# Supplementary material for: Zinc acquisition and its contribution to Klebsiella pneumoniae virulence
Source: Front Cell Infect Microbiol. 2024 Jan 5;13:1322973. doi: 10.3389/fcimb.2023.1322973 (PMC10797113; doi:10.3389/fcimb.2023.1322973)
Supplement: Supplementary file 2 [file Table_1.xlsx]

## Sheet: SI table. Summary of hits.
Table S1. Genomic screening of Klebsiella spp.
Summary of hits by count (number of hits), ratio (number of hits/total genomes) and variation of target gene screens
		znuA	znuB	znuC	mepM	zniA	zniB	zniC	znuCBA-mepM operon	zniCBA operon
Counts	Present*	2691	2586	2683	2677	2687	2626	2589	2586	2597
	Partial*	2	55	11	5	3	14	63	-	-
	Ambiguous*	2	7	0	3	1	12	21	-	-
	Contig break	7	52	8	15	5	35	8	77	27
	Ns	0	0	0	0	0	0	1	0	1
	Sum hits	2702	2700	2702	2700	2696	2687	2682	2663	2625
	Premature stop*	4	3	3	6	8	14	14	-	-
	Absent*	0	3	1	0	2	5	10	43	81
Ratios	Present*	0.994457	0.955654	0.9915	0.989283	0.992979	0.970436	0.956763	0.955654	0.959719
	Partial*	0.000739098	0.0203252	0.00406504	0.00184775	0.00110865	0.00517369	0.0232816	-	-
	Ambiguous*	0.000739098	0.00258684	0	0.00110865	0.000369549	0.00443459	0.00776053	-	-
	Contig break	0.00258684	0.0192166	0.00295639	0.00554324	0.00184775	0.0129342	0.00295639	0.0284553	0.00997783
	Ns	0	0	0	0	0	0	0.000369549	0	0.000369549
	Total hits	0.998522	0.997783	0.998522	0.997783	0.996305	0.992979	0.991131	0.984109	0.970067
	Premature stop*	0.0014782	0.00110865	0.00110865	0.00221729	0.00295639	0.00517369	0.00517369	-	-
	Absent*	0	0.00110865	0.000369549	0	0.000739098	0.00184775	0.00369549	0.0158906	0.0299335
	Total	1	1	1	1	1	1	1	1	1
Variation	Nucleotide pairwise identity (%)^	99	98.5	98.6	98.6	98.3	98.2	98.3	98.7	98.2
	Unique amino acid variants^	101	110	64	63	121	86	102	-	-
	Amino acid pairwise identity (%)^	99.3	99.4	99.7	99.8	98.8	99.1	98.6	-	-
^Variation data calculated on full length data - excludes partial and ambiguous hits
* Gene status (present, absent, partial, ambigous) as determined by full length and fragment screening, with status assigned as per the key below:
*KEY		znuA	znuB	znuC	mepM	zniA	zniB	zniC
Gene length (bp)		945	786	753	1320	879	864	678
Gene fragments screened (240 bp)		3	3	3	3	3	3	3
*Definition		Fragments present in genome
*Present		3
*Partial		2
*Ambiguous		1
*Absent		0

## Sheet: Full hits table
Names tree	Species	Strain	Country	Accession	Reference	Source	infection	Year	znuA	znuB	znuC	mepM	zniA	zniB	zniC	znuCBA-mepM operon	zniCBA operon
TTSH18_S27_	Klebsiella pneumoniae	TTSH1	Singapore	SRR5082381	Lee et al.	human	infection		PRESENT	PRESENT	PRESENT	PRESENT	PRESENT	PRESENT	PRESENT	PRESENT	PRESENT
TTSH13_S26_	Klebsiella pneumoniae	TTSH1	Singapore	SRR5082356	Lee et al.	human	infection		PRESENT	PRESENT	PRESENT	PRESENT	PRESENT	PRESENT	PRESENT	PRESENT	PRESENT
TTSH05_S25_	Klebsiella pneumoniae	TTSH0	Singapore	SRR5082358	Lee et al.	human	infection		PRESENT	PRESENT	PRESENT	PRESENT	PRESENT	PRESENT	PRESENT	PRESENT	PRESENT
TTSH04_S24_	Klebsiella quasipneumoniae subsp. similipneumoniae	TTSH0	Singapore	SRR5082375	Lee et al.	human	infection		PRESENT	PRESENT	PRESENT	PRESENT	PRESENT	PRESENT	PRESENT	PRESENT	PRESENT
SRR2098816	Klebsiella variicola	Kpn0052	USA	SRR2098816	Davis et al.	human	infection	2011	PRESENT	PRESENT	PRESENT	PRESENT	PRESENT	PRESENT	PRESENT	PRESENT	PRESENT
SRR2098815	Klebsiella variicola	Kpn0044	USA	SRR2098815	Davis et al.	pork		2012	PRESENT	PRESENT	PRESENT	PRESENT	PRESENT	PRESENT	PRESENT	PRESENT	PRESENT
SRR2098814	Klebsiella pneumoniae	Kpn0027	USA	SRR2098814	Davis et al.	chicken		2012	PRESENT	PRESENT	PRESENT	PRESENT	PRESENT	PRESENT	PRESENT	PRESENT	PRESENT
SRR2098813	Klebsiella variicola	Kpn0060	USA	SRR2098813	Davis et al.	human	infection	2012	PRESENT	PRESENT	PRESENT	STOPS	PRESENT	PRESENT	PRESENT	ABSENT	PRESENT
SRR2098812	Klebsiella variicola	Kpn0058	USA	SRR2098812	Davis et al.	human	infection	2012	CONTIG	AMBIGUOUS	CONTIG	CONTIG	PRESENT	AMBIGUOUS	PARTIAL	ABSENT	ABSENT
SRR2098811	Klebsiella variicola	Kpn0045	USA	SRR2098811	Davis et al.	human	infection	2011	PRESENT	PRESENT	PRESENT	PRESENT	PRESENT	PRESENT	PRESENT	PRESENT	PRESENT
SRR2098810	Klebsiella variicola	Kpn0063	USA	SRR2098810	Davis et al.	human	infection	2012	PRESENT	PRESENT	PRESENT	PRESENT	PRESENT	PRESENT	PRESENT	PRESENT	PRESENT
SRR2098809	Klebsiella variicola	Kpn0054	USA	SRR2098809	Davis et al.	human	infection	2012	PRESENT	PRESENT	PRESENT	PRESENT	PRESENT	PRESENT	PRESENT	PRESENT	PRESENT
SRR2098807	Klebsiella variicola	Kpn0020	USA	SRR2098807	Davis et al.	pork		2012	PRESENT	PRESENT	PRESENT	CONTIG	PRESENT	CONTIG	PRESENT	ABSENT	ABSENT
SRR2098802	Klebsiella variicola	Kpn0042	USA	SRR2098802	Davis et al.	chicken		2012	PRESENT	PRESENT	PRESENT	PRESENT	PRESENT	PRESENT	PRESENT	PRESENT	PRESENT
SRR2098801	Klebsiella variicola	Kpn0040	USA	SRR2098801	Davis et al.	chicken		2012	PRESENT	PRESENT	PRESENT	PRESENT	PRESENT	PRESENT	PRESENT	PRESENT	PRESENT
SRR2098800	Klebsiella variicola	Kpn0073	USA	SRR2098800	Davis et al.	human	infection	2012	PRESENT	PRESENT	PRESENT	PRESENT	PRESENT	PRESENT	PRESENT	PRESENT	PRESENT
SRR2098799	Klebsiella pneumoniae	Kpn0081	USA	SRR2098799	Davis et al.	human	infection	2012	PRESENT	PRESENT	PRESENT	PRESENT	PRESENT	PRESENT	PRESENT	PRESENT	PRESENT
SRR2098797	Klebsiella pneumoniae	Kpn0057	USA	SRR2098797	Davis et al.	human	infection	2012	PRESENT	PRESENT	PRESENT	PRESENT	PRESENT	PRESENT	PRESENT	PRESENT	PRESENT
SRR2098794	Klebsiella pneumoniae	Kpn0082	USA	SRR2098794	Davis et al.	human	infection	2012	PRESENT	PRESENT	PRESENT	PRESENT	PRESENT	PRESENT	PRESENT	PRESENT	PRESENT
SRR2098790	Klebsiella pneumoniae	Kpn0041	USA	SRR2098790	Davis et al.	pork		2012	PRESENT	PRESENT	PRESENT	PRESENT	PRESENT	PRESENT	PRESENT	PRESENT	PRESENT
SRR2098789	Klebsiella pneumoniae	Kpn0068	USA	SRR2098789	Davis et al.	human	infection	2012	PRESENT	PRESENT	PRESENT	PARTIAL	PRESENT	PARTIAL	CONTIG	ABSENT	ABSENT
SRR2098788	Klebsiella pneumoniae	Kpn0021	USA	SRR2098788	Davis et al.	chicken		2012	PRESENT	PRESENT	PRESENT	PRESENT	PRESENT	PRESENT	PRESENT	PRESENT	PRESENT
SRR2098787	Klebsiella pneumoniae	Kpn0002	USA	SRR2098787	Davis et al.	chicken		2012	PRESENT	PRESENT	PRESENT	PRESENT	PRESENT	PRESENT	PRESENT	PRESENT	PRESENT
SRR2098785	Klebsiella pneumoniae	Kpn0070	USA	SRR2098785	Davis et al.	human	infection	2012	PRESENT	PRESENT	PRESENT	PRESENT	PRESENT	PRESENT	PRESENT	PRESENT	PRESENT
SRR2098783	Klebsiella pneumoniae	Kpn0003	USA	SRR2098783	Davis et al.	chicken		2012	PRESENT	PRESENT	PRESENT	PRESENT	PRESENT	PRESENT	PRESENT	PRESENT	PRESENT
SRR2098780	Klebsiella pneumoniae	Kpn0067	USA	SRR2098780	Davis et al.	human	infection	2012	CONTIG	PARTIAL	CONTIG	PRESENT	PRESENT	PRESENT	PRESENT	ABSENT	PRESENT
SRR2098777	Klebsiella pneumoniae	Kpn0007	USA	SRR2098777	Davis et al.	chicken		2012	PRESENT	PRESENT	PRESENT	PRESENT	PRESENT	PRESENT	PRESENT	PRESENT	PRESENT
SRR2098776	Klebsiella pneumoniae	Kpn0077	USA	SRR2098776	Davis et al.	human	infection	2012	PRESENT	PRESENT	PRESENT	PRESENT	PRESENT	PRESENT	PRESENT	PRESENT	PRESENT
SRR2098775	Klebsiella pneumoniae	Kpn0025	USA	SRR2098775	Davis et al.	chicken		2012	PRESENT	PRESENT	PRESENT	PRESENT	PRESENT	PRESENT	PRESENT	PRESENT	PRESENT
SRR2098774	Klebsiella pneumoniae	Kpn0009	USA	SRR2098774	Davis et al.	turkey		2012	PRESENT	PRESENT	PRESENT	PRESENT	PRESENT	PRESENT	PRESENT	PRESENT	PRESENT
SRR2098773	Klebsiella pneumoniae	Kpn0038	USA	SRR2098773	Davis et al.	chicken		2012	PRESENT	PRESENT	PRESENT	PRESENT	PRESENT	PRESENT	PRESENT	PRESENT	PRESENT
SRR2098772	Klebsiella pneumoniae	Kpn0001	USA	SRR2098772	Davis et al.	chicken		2012	PRESENT	PRESENT	PRESENT	PRESENT	PRESENT	PRESENT	PRESENT	PRESENT	PRESENT
SRR2098771	Klebsiella pneumoniae	Kpn0032	USA	SRR2098771	Davis et al.	pork		2012	PRESENT	PRESENT	PRESENT	PRESENT	PRESENT	PRESENT	PRESENT	PRESENT	PRESENT
SRR2098770	Klebsiella pneumoniae	Kpn0031	USA	SRR2098770	Davis et al.	pork		2012	PRESENT	PRESENT	PRESENT	PRESENT	PRESENT	PRESENT	PRESENT	PRESENT	PRESENT
SRR2098769	Klebsiella pneumoniae	Kpn0030	USA	SRR2098769	Davis et al.	pork		2012	PRESENT	PRESENT	PRESENT	PRESENT	PRESENT	PRESENT	PRESENT	PRESENT	PRESENT
SRR2098768	Klebsiella pneumoniae	Kpn0017	USA	SRR2098768	Davis et al.	turkey		2012	PRESENT	PRESENT	PRESENT	PRESENT	PRESENT	PRESENT	PRESENT	PRESENT	PRESENT
SRR2098767	Klebsiella pneumoniae	Kpn0050	USA	SRR2098767	Davis et al.	human	infection	2011	PRESENT	AMBIGUOUS	CONTIG	PRESENT	PRESENT	PRESENT	PRESENT	ABSENT	PRESENT
SRR2098766	Klebsiella pneumoniae	Kpn0014	USA	SRR2098766	Davis et al.	turkey		2012	PARTIAL	AMBIGUOUS	PRESENT	CONTIG	STOPS	PRESENT	PARTIAL	ABSENT	ABSENT
SRR2098765	Klebsiella pneumoniae	Kpn0035	USA	SRR2098765	Davis et al.	turkey		2012	PRESENT	PRESENT	PRESENT	PRESENT	PRESENT	PRESENT	PRESENT	PRESENT	PRESENT
SRR2098764	Klebsiella pneumoniae	Kpn0012	USA	SRR2098764	Davis et al.	turkey		2012	PRESENT	PRESENT	PRESENT	PRESENT	PRESENT	PRESENT	PRESENT	PRESENT	PRESENT
SRR2098763	Klebsiella pneumoniae	Kpn0005	USA	SRR2098763	Davis et al.	chicken		2012	PRESENT	PRESENT	CONTIG	PRESENT	PRESENT	PRESENT	PRESENT	ABSENT	PRESENT
SRR2098762	Klebsiella pneumoniae	Kpn0056	USA	SRR2098762	Davis et al.	human	infection	2012	PRESENT	PRESENT	PRESENT	PRESENT	PRESENT	PRESENT	PRESENT	PRESENT	PRESENT
SRR2098761	Klebsiella pneumoniae	Kpn0022	USA	SRR2098761	Davis et al.	chicken		2012	PRESENT	PRESENT	PRESENT	PRESENT	PRESENT	PRESENT	PRESENT	PRESENT	PRESENT
SRR2098760	Klebsiella pneumoniae	Kpn0024	USA	SRR2098760	Davis et al.	turkey		2012	PRESENT	PRESENT	PRESENT	PRESENT	PRESENT	PRESENT	PRESENT	PRESENT	PRESENT
SRR2098759	Klebsiella pneumoniae	Kpn0023	USA	SRR2098759	Davis et al.	turkey		2012	PRESENT	PRESENT	PRESENT	PRESENT	PRESENT	PRESENT	PRESENT	PRESENT	PRESENT
SRR2098758	Klebsiella pneumoniae	Kpn0074	USA	SRR2098758	Davis et al.	human	infection	2012	PRESENT	PRESENT	PRESENT	STOPS	PRESENT	PRESENT	PRESENT	PRESENT	PRESENT
SRR2098757	Klebsiella pneumoniae	Kpn0069	USA	SRR2098757	Davis et al.	human	infection	2012	PRESENT	PRESENT	PRESENT	PRESENT	PRESENT	PRESENT	PRESENT	PRESENT	PRESENT
SRR2098756	Klebsiella pneumoniae	Kpn0033	USA	SRR2098756	Davis et al.	turkey		2012	PRESENT	PRESENT	PRESENT	CONTIG	PRESENT	PRESENT	PRESENT	ABSENT	PRESENT
SRR2098755	Klebsiella pneumoniae	Kpn0080	USA	SRR2098755	Davis et al.	human	infection	2012	PRESENT	PRESENT	PRESENT	PRESENT	PRESENT	PRESENT	PRESENT	PRESENT	PRESENT
SRR2098754	Klebsiella pneumoniae	Kpn0051	USA	SRR2098754	Davis et al.	human	infection	2011	PRESENT	PRESENT	PRESENT	PRESENT	PRESENT	PRESENT	PRESENT	PRESENT	PRESENT
SRR2098753	Klebsiella pneumoniae	Kpn0076	USA	SRR2098753	Davis et al.	human	infection	2012	PRESENT	PRESENT	PRESENT	PRESENT	PRESENT	PRESENT	PRESENT	PRESENT	PRESENT
SRR2098752	Klebsiella pneumoniae	Kpn0043	USA	SRR2098752	Davis et al.	turkey		2012	PRESENT	PRESENT	PRESENT	CONTIG	PRESENT	PRESENT	PRESENT	ABSENT	PRESENT
SRR2098751	Klebsiella pneumoniae	Kpn0039	USA	SRR2098751	Davis et al.	turkey		2012	PRESENT	PRESENT	PRESENT	PRESENT	PRESENT	PRESENT	PRESENT	PRESENT	PRESENT
SRR2098710	Klebsiella pneumoniae	Kpn0019	USA	SRR2098710	Davis et al.	pork		2012	PRESENT	PRESENT	PRESENT	PRESENT	PRESENT	PRESENT	PRESENT	PRESENT	PRESENT
SRR2098701	Klebsiella pneumoniae	Kpn0006	USA	SRR2098701	Davis et al.	chicken		2012	PRESENT	PARTIAL	PRESENT	CONTIG	PRESENT	STOPS	PARTIAL	ABSENT	CONTIG
SRR2098700	Klebsiella pneumoniae	Kpn0047	USA	SRR2098700	Davis et al.	human	infection	2011	PRESENT	PARTIAL	PRESENT	PRESENT	PRESENT	PRESENT	PRESENT	PRESENT	PRESENT
SRR2098699	Klebsiella pneumoniae	Kpn0034	USA	SRR2098699	Davis et al.	turkey		2012	PRESENT	PRESENT	PRESENT	PRESENT	PRESENT	PRESENT	PRESENT	PRESENT	PRESENT
SRR2098698	Klebsiella pneumoniae	Kpn0016	USA	SRR2098698	Davis et al.	turkey		2012	PRESENT	PRESENT	PRESENT	PRESENT	PRESENT	PRESENT	PRESENT	PRESENT	PRESENT
SRR2098697	Klebsiella pneumoniae	Kpn0004	USA	SRR2098697	Davis et al.	chicken		2012	PRESENT	PRESENT	PRESENT	PRESENT	PRESENT	PRESENT	PRESENT	PRESENT	PRESENT
SRR2098696	Klebsiella pneumoniae	Kpn0026	USA	SRR2098696	Davis et al.	pork		2012	PRESENT	PRESENT	PRESENT	PRESENT	PRESENT	PRESENT	PRESENT	PRESENT	PRESENT
SRR2098695	Klebsiella pneumoniae	Kpn0064	USA	SRR2098695	Davis et al.	human	infection	2012	CONTIG	CONTIG	PRESENT	PARTIAL	CONTIG	CONTIG	PRESENT	ABSENT	ABSENT
SRR2098694	Klebsiella pneumoniae	Kpn0018	USA	SRR2098694	Davis et al.	pork		2012	PRESENT	PRESENT	PRESENT	PRESENT	PRESENT	PRESENT	PRESENT	PRESENT	PRESENT
SRR2098693	Klebsiella pneumoniae	Kpn0059	USA	SRR2098693	Davis et al.	human	infection	2012	PRESENT	PRESENT	PRESENT	CONTIG	PRESENT	PRESENT	PRESENT	ABSENT	PRESENT
SRR2098691	Klebsiella pneumoniae	Kpn0036	USA	SRR2098691	Davis et al.	pork		2012	PRESENT	PRESENT	PRESENT	PRESENT	PRESENT	PRESENT	PRESENT	PRESENT	PRESENT
SRR2098690	Klebsiella pneumoniae	Kpn0010	USA	SRR2098690	Davis et al.	turkey		2012	PRESENT	PRESENT	PRESENT	PRESENT	PRESENT	PRESENT	PRESENT	PRESENT	PRESENT
SRR2098689	Klebsiella pneumoniae	Kpn0008	USA	SRR2098689	Davis et al.	turkey		2012	PRESENT	PRESENT	PRESENT	PRESENT	PRESENT	PRESENT	PRESENT	PRESENT	PRESENT
SRR2098688	Klebsiella pneumoniae	Kpn0028	USA	SRR2098688	Davis et al.	chicken		2012	PRESENT	PRESENT	PRESENT	STOPS	PRESENT	PRESENT	PRESENT	PRESENT	PRESENT
SRR2098687	Klebsiella pneumoniae	Kpn0029	USA	SRR2098687	Davis et al.	chicken		2012	PRESENT	PRESENT	PRESENT	PRESENT	PRESENT	PRESENT	PRESENT	PRESENT	PRESENT
SRR2098686	Klebsiella pneumoniae	Kpn0049	USA	SRR2098686	Davis et al.	human	infection	2011	AMBIGUOUS	CONTIG	PRESENT	AMBIGUOUS	PRESENT	PRESENT	PRESENT	ABSENT	ABSENT
SRR2098685	Klebsiella pneumoniae	Kpn0015	USA	SRR2098685	Davis et al.	turkey		2012	PRESENT	PRESENT	PRESENT	CONTIG	PRESENT	PRESENT	PRESENT	ABSENT	PRESENT
SRR2098684	Klebsiella pneumoniae	Kpn0011	USA	SRR2098684	Davis et al.	turkey		2012	PRESENT	PRESENT	PRESENT	PRESENT	PRESENT	PRESENT	PRESENT	PRESENT	PRESENT
SRR2098683	Klebsiella pneumoniae	Kpn0013	USA	SRR2098683	Davis et al.	turkey		2012	PRESENT	PRESENT	PRESENT	PRESENT	PRESENT	PRESENT	PRESENT	PRESENT	PRESENT
SRR2098682	Klebsiella pneumoniae	Kpn0046	USA	SRR2098682	Davis et al.	human	infection	2011	PRESENT	CONTIG	CONTIG	PRESENT	PRESENT	PRESENT	PRESENT	CONTIG	PRESENT
SRR2098681	Klebsiella pneumoniae	Kpn0075	USA	SRR2098681	Davis et al.	human	infection	2012	PRESENT	PRESENT	PRESENT	PRESENT	PRESENT	PRESENT	PRESENT	PRESENT	PRESENT
SRR2098680	Klebsiella pneumoniae	Kpn0071	USA	SRR2098680	Davis et al.	human	infection	2012	PRESENT	PRESENT	PRESENT	PRESENT	PRESENT	PRESENT	PRESENT	PRESENT	PRESENT
SRR2098679	Klebsiella pneumoniae	Kpn0078	USA	SRR2098679	Davis et al.	human	infection	2012	PRESENT	PRESENT	PRESENT	PRESENT	PRESENT	PRESENT	PRESENT	PRESENT	PRESENT
SRR2098678	Klebsiella pneumoniae	Kpn0066	USA	SRR2098678	Davis et al.	human	infection	2012	PRESENT	PRESENT	PRESENT	CONTIG	PRESENT	PRESENT	PRESENT	ABSENT	PRESENT
SRR2098677	Klebsiella pneumoniae	Kpn0062	USA	SRR2098677	Davis et al.	human	infection	2012	PRESENT	PRESENT	PARTIAL	CONTIG	PRESENT	PRESENT	PRESENT	ABSENT	PRESENT
SRR2098676	Klebsiella pneumoniae	Kpn0065	USA	SRR2098676	Davis et al.	human	infection	2012	PRESENT	PRESENT	PRESENT	PRESENT	PRESENT	PRESENT	PRESENT	PRESENT	PRESENT
SRR2098675	Klebsiella pneumoniae	Kpn0079	USA	SRR2098675	Davis et al.	human	infection	2012	PRESENT	PRESENT	PRESENT	PRESENT	PRESENT	PRESENT	PRESENT	PRESENT	PRESENT
SRR2098672	Klebsiella quasipneumoniae subsp. similipneumoniae	Kpn0048	USA	SRR2098672	Davis et al.	human	infection	2011	PRESENT	CONTIG	PRESENT	PRESENT	PARTIAL	CONTIG	PRESENT	CONTIG	ABSENT
SRR1561364	Klebsiella pneumoniae	US-WV-2011b	USA	SRR1561364	Bowers et al.	human		2011	PRESENT	PRESENT	PRESENT	PRESENT	PRESENT	PRESENT	PRESENT	PRESENT	PRESENT
SRR1561363	Klebsiella pneumoniae	US-WV-2011a	USA	SRR1561363	Bowers et al.	human		2011	PRESENT	PRESENT	PRESENT	PRESENT	PRESENT	PRESENT	PRESENT	PRESENT	PRESENT
SRR1561362	Klebsiella pneumoniae	US-WA-2010	USA	SRR1561362	Bowers et al.	human		2010	PRESENT	PRESENT	PRESENT	PRESENT	PRESENT	PRESENT	PRESENT	PRESENT	PRESENT
SRR1561361	Klebsiella pneumoniae	US-VA-2008b	USA	SRR1561361	Bowers et al.	human		2008	PRESENT	PRESENT	PRESENT	PRESENT	PRESENT	PRESENT	PRESENT	PRESENT	PRESENT
SRR1561360	Klebsiella pneumoniae	US-VA-2008a	USA	SRR1561360	Bowers et al.	human		2008	PRESENT	PRESENT	PRESENT	PRESENT	PRESENT	PRESENT	PRESENT	PRESENT	PRESENT
SRR1561358	Klebsiella pneumoniae	US-TX-2011	USA	SRR1561358	Bowers et al.	human		2011	PRESENT	PRESENT	PRESENT	PRESENT	PRESENT	PRESENT	PRESENT	PRESENT	PRESENT
SRR1561357	Klebsiella pneumoniae	US-TX-2001	USA	SRR1561357	Bowers et al.	human		2001	PRESENT	PRESENT	PRESENT	PRESENT	PRESENT	PRESENT	PRESENT	PRESENT	PRESENT
SRR1561356	Klebsiella pneumoniae	US-SD-2012	USA	SRR1561356	Bowers et al.	human		2012	PRESENT	STOPS	PRESENT	PRESENT	PRESENT	PRESENT	PRESENT	PRESENT	PRESENT
SRR1561355	Klebsiella pneumoniae	US-RI-2008	USA	SRR1561355	Bowers et al.	human		2008	PRESENT	PRESENT	PRESENT	PRESENT	PRESENT	PRESENT	PRESENT	PRESENT	PRESENT
SRR1561354	Klebsiella pneumoniae	US-PA-2011b	USA	SRR1561354	Bowers et al.	human		2011	PRESENT	PRESENT	PRESENT	PRESENT	PRESENT	PRESENT	PRESENT	PRESENT	PRESENT
SRR1561353	Klebsiella pneumoniae	US-PA-2011a	USA	SRR1561353	Bowers et al.	human		2011	PRESENT	PRESENT	PRESENT	PRESENT	PRESENT	PRESENT	PRESENT	PRESENT	PRESENT
SRR1561352	Klebsiella pneumoniae	US-PA-2008	USA	SRR1561352	Bowers et al.	human		2008	PRESENT	PARTIAL	PRESENT	PRESENT	PRESENT	PRESENT	PRESENT	CONTIG	PRESENT
SRR1561351	Klebsiella pneumoniae	US-PA-2007	USA	SRR1561351	Bowers et al.	human		2007	PRESENT	PRESENT	PRESENT	PRESENT	PRESENT	PRESENT	PRESENT	PRESENT	PRESENT
SRR1561350	Klebsiella pneumoniae	US-PA-2005b	USA	SRR1561350	Bowers et al.	human		2005	PRESENT	PRESENT	PRESENT	PRESENT	PRESENT	PRESENT	PRESENT	PRESENT	PRESENT
SRR1561349	Klebsiella pneumoniae	US-PA-2005a	USA	SRR1561349	Bowers et al.	human		2005	PRESENT	PRESENT	PRESENT	PRESENT	PRESENT	PRESENT	PRESENT	PRESENT	PRESENT
SRR1561348	Klebsiella quasipneumoniae subsp. similipneumoniae	US-PA-2001	USA	SRR1561348	Bowers et al.	human		2001	PRESENT	PRESENT	PRESENT	PRESENT	PRESENT	PRESENT	PRESENT	PRESENT	PRESENT
SRR1561347	Klebsiella pneumoniae	US-OR-2010	USA	SRR1561347	Bowers et al.	human		2010	PRESENT	PRESENT	PRESENT	PRESENT	PRESENT	PRESENT	PRESENT	PRESENT	PRESENT
SRR1561346	Klebsiella pneumoniae	US-NY-2010	USA	SRR1561346	Bowers et al.	human		2010	PRESENT	PARTIAL	PRESENT	PRESENT	PRESENT	PRESENT	PRESENT	PRESENT	PRESENT
SRR1561345	Klebsiella pneumoniae	US-NY-2009c	USA	SRR1561345	Bowers et al.	human		2009	PRESENT	PRESENT	PRESENT	PRESENT	PRESENT	PRESENT	PRESENT	PRESENT	PRESENT
SRR1561344	Klebsiella pneumoniae	US-NY-2009b	USA	SRR1561344	Bowers et al.	human		2009	PRESENT	PRESENT	PRESENT	PRESENT	PRESENT	PRESENT	PRESENT	PRESENT	PRESENT
SRR1561343	Klebsiella pneumoniae	US-NY-2009a	USA	SRR1561343	Bowers et al.	human		2009	PRESENT	PRESENT	PRESENT	PRESENT	PRESENT	PRESENT	PRESENT	PRESENT	PRESENT
SRR1561342	Klebsiella pneumoniae	US-NY-2005d	USA	SRR1561342	Bowers et al.	human		2005	PRESENT	PRESENT	PRESENT	PRESENT	PRESENT	PRESENT	PRESENT	PRESENT	PRESENT
SRR1561341	Klebsiella pneumoniae	US-NY-2005c	USA	SRR1561341	Bowers et al.	human		2005	PRESENT	PRESENT	PRESENT	PRESENT	PRESENT	PRESENT	PRESENT	PRESENT	PRESENT
SRR1561340	Klebsiella pneumoniae	US-NY-2005b	USA	SRR1561340	Bowers et al.	human		2005	PRESENT	PRESENT	PRESENT	PRESENT	PRESENT	PRESENT	PRESENT	PRESENT	PRESENT
SRR1561339	Klebsiella pneumoniae	US-NY-2005a	USA	SRR1561339	Bowers et al.	human		2005	PRESENT	PRESENT	PRESENT	PRESENT	PRESENT	PRESENT	PRESENT	PRESENT	PRESENT
SRR1561338	Klebsiella pneumoniae	US-NY-2004d	USA	SRR1561338	Bowers et al.	human		2004	PRESENT	PRESENT	PRESENT	PRESENT	PRESENT	PRESENT	PRESENT	PRESENT	PRESENT
SRR1561337	Klebsiella pneumoniae	US-NY-2004c	USA	SRR1561337	Bowers et al.	human		2004	PRESENT	PRESENT	PRESENT	PRESENT	PRESENT	PRESENT	PRESENT	PRESENT	PRESENT
SRR1561336	Klebsiella pneumoniae	US-NY-2004b	USA	SRR1561336	Bowers et al.	human		2004	PRESENT	PRESENT	PRESENT	PRESENT	PRESENT	PRESENT	PRESENT	PRESENT	PRESENT
SRR1561335	Klebsiella pneumoniae	US-NY-2004a	USA	SRR1561335	Bowers et al.	human		2004	PRESENT	PRESENT	PRESENT	PRESENT	PRESENT	PRESENT	PRESENT	PRESENT	PRESENT
SRR1561334	Klebsiella pneumoniae	US-NM-2007	USA	SRR1561334	Bowers et al.	human		2007	PRESENT	PRESENT	PRESENT	PRESENT	PRESENT	PRESENT	PRESENT	PRESENT	PRESENT
SRR1561333	Klebsiella pneumoniae	US-NJ-2007b	USA	SRR1561333	Bowers et al.	human		2007	PRESENT	PRESENT	PRESENT	PRESENT	PRESENT	PRESENT	PRESENT	PRESENT	PRESENT
SRR1561332	Klebsiella pneumoniae	US-NJ-2007a	USA	SRR1561332	Bowers et al.	human		2007	PRESENT	PRESENT	PRESENT	PRESENT	PRESENT	PRESENT	PRESENT	PRESENT	PRESENT
SRR1561331	Klebsiella pneumoniae	US-NJ-2006	USA	SRR1561331	Bowers et al.	human		2006	PRESENT	PRESENT	PRESENT	PRESENT	PRESENT	PRESENT	PRESENT	PRESENT	PRESENT
SRR1561330	Klebsiella pneumoniae	US-NJ-2005	USA	SRR1561330	Bowers et al.	human		2005	PRESENT	PRESENT	PRESENT	PRESENT	PRESENT	PRESENT	PRESENT	PRESENT	PRESENT
SRR1561329	Klebsiella pneumoniae	US-NJ-2004b	USA	SRR1561329	Bowers et al.	human		2004	PRESENT	PRESENT	PRESENT	PRESENT	PRESENT	PRESENT	PRESENT	PRESENT	PRESENT
SRR1561328	Klebsiella pneumoniae	US-NJ-2004a	USA	SRR1561328	Bowers et al.	human		2004	PRESENT	PRESENT	PRESENT	PRESENT	PRESENT	PRESENT	PRESENT	PRESENT	PRESENT
SRR1561327	Klebsiella pneumoniae	US-NJ-2003	USA	SRR1561327	Bowers et al.	human		2003	PRESENT	PARTIAL	PRESENT	PRESENT	PRESENT	PRESENT	PRESENT	PRESENT	PRESENT
SRR1561326	Klebsiella pneumoniae	US-NH-2008	USA	SRR1561326	Bowers et al.	human		2008	PRESENT	PRESENT	PRESENT	PRESENT	PRESENT	PRESENT	PRESENT	PRESENT	PRESENT
SRR1561325	Klebsiella pneumoniae	US-ND-2011	USA	SRR1561325	Bowers et al.	human		2011	PRESENT	PRESENT	PRESENT	PRESENT	PRESENT	PRESENT	PRESENT	PRESENT	PRESENT
SRR1561324	Klebsiella pneumoniae	US-NC-1996	USA	SRR1561324	Bowers et al.	human		1996	PRESENT	PRESENT	PRESENT	PRESENT	PRESENT	PRESENT	PRESENT	PRESENT	PRESENT
SRR1561323	Klebsiella pneumoniae	US-MO-2006	USA	SRR1561323	Bowers et al.	human		2006	PRESENT	PRESENT	PRESENT	PRESENT	PRESENT	PRESENT	PRESENT	PRESENT	PRESENT
SRR1561321	Klebsiella pneumoniae	US-MD-2011	USA	SRR1561321	Bowers et al.	human		2011	PRESENT	PRESENT	PRESENT	PRESENT	PRESENT	PRESENT	PRESENT	PRESENT	PRESENT
SRR1561320	Klebsiella pneumoniae	US-MD-2006	USA	SRR1561320	Bowers et al.	human		2006	PRESENT	PRESENT	PRESENT	PRESENT	PRESENT	PRESENT	PRESENT	PRESENT	PRESENT
SRR1561319	Klebsiella pneumoniae	US-MD-2005	USA	SRR1561319	Bowers et al.	human		2005	PRESENT	PRESENT	PRESENT	PRESENT	PRESENT	PRESENT	PRESENT	PRESENT	PRESENT
SRR1561318	Klebsiella pneumoniae	US-MA-2008	USA	SRR1561318	Bowers et al.	human		2008	PRESENT	PRESENT	PRESENT	PRESENT	PRESENT	PRESENT	PRESENT	PRESENT	PRESENT
SRR1561317	Klebsiella pneumoniae	US-MA-2007	USA	SRR1561317	Bowers et al.	human		2007	PRESENT	PRESENT	PRESENT	PRESENT	PRESENT	PRESENT	PRESENT	PRESENT	PRESENT
SRR1561316	Klebsiella pneumoniae	US-IL-2009b	USA	SRR1561316	Bowers et al.	human		2009	PRESENT	PRESENT	PRESENT	PRESENT	PRESENT	PRESENT	PRESENT	PRESENT	PRESENT
SRR1561315	Klebsiella pneumoniae	US-IL-2009a	USA	SRR1561315	Bowers et al.	human		2009	PRESENT	PRESENT	PRESENT	PRESENT	PRESENT	PRESENT	PRESENT	PRESENT	PRESENT
SRR1561314	Klebsiella pneumoniae	US-IL-2008b	USA	SRR1561314	Bowers et al.	human		2008	PRESENT	PRESENT	PRESENT	PRESENT	PRESENT	PRESENT	PRESENT	PRESENT	PRESENT
SRR1561313	Klebsiella pneumoniae	US-IL-2008a	USA	SRR1561313	Bowers et al.	human		2008	PRESENT	PRESENT	PRESENT	PRESENT	PRESENT	PRESENT	PRESENT	PRESENT	PRESENT
SRR1561312	Klebsiella pneumoniae	US-GA-2009d	USA	SRR1561312	Bowers et al.	human		2009	PRESENT	PRESENT	PRESENT	PRESENT	PRESENT	PRESENT	PRESENT	PRESENT	PRESENT
SRR1561311	Klebsiella pneumoniae	US-GA-2009c	USA	SRR1561311	Bowers et al.	human		2009	PRESENT	CONTIG	PRESENT	PRESENT	PRESENT	PRESENT	PRESENT	CONTIG	PRESENT
SRR1561310	Klebsiella variicola	US-GA-2009b	USA	SRR1561310	Bowers et al.	human		2009	PRESENT	PRESENT	PRESENT	PRESENT	PRESENT	PRESENT	PRESENT	PRESENT	PRESENT
SRR1561309	Klebsiella pneumoniae	US-GA-2009a	USA	SRR1561309	Bowers et al.	human		2009	PRESENT	PRESENT	PRESENT	PRESENT	PRESENT	PRESENT	CONTIG	PRESENT	ABSENT
SRR1561308	Klebsiella pneumoniae	US-GA-2007	USA	SRR1561308	Bowers et al.	human		2007	PRESENT	PRESENT	PRESENT	PRESENT	PRESENT	PRESENT	PRESENT	PRESENT	PRESENT
SRR1561307	Klebsiella pneumoniae	US-GA-2006b	USA	SRR1561307	Bowers et al.	human		2006	PRESENT	PRESENT	PRESENT	PRESENT	PRESENT	PRESENT	PRESENT	PRESENT	PRESENT
SRR1561306	Klebsiella pneumoniae	US-GA-2006a	USA	SRR1561306	Bowers et al.	human		2006	PRESENT	PRESENT	PRESENT	PRESENT	PRESENT	PRESENT	PRESENT	PRESENT	PRESENT
SRR1561305	Klebsiella pneumoniae	US-FL-2011	USA	SRR1561305	Bowers et al.	human		2011	PRESENT	PRESENT	PRESENT	PRESENT	PRESENT	PRESENT	PRESENT	PRESENT	PRESENT
SRR1561304	Klebsiella pneumoniae	US-FL-2008	USA	SRR1561304	Bowers et al.	human		2008	PRESENT	PRESENT	PRESENT	PRESENT	PRESENT	PRESENT	PRESENT	PRESENT	PRESENT
SRR1561303	Klebsiella pneumoniae	US-DE-2007	USA	SRR1561303	Bowers et al.	human		2007	PRESENT	PRESENT	PRESENT	PRESENT	PRESENT	PRESENT	PRESENT	PRESENT	PRESENT
SRR1561302	Klebsiella pneumoniae	US-DE-2006	USA	SRR1561302	Bowers et al.	human		2006	PRESENT	PRESENT	PRESENT	PRESENT	PRESENT	PRESENT	PRESENT	PRESENT	PRESENT
SRR1561301	Klebsiella pneumoniae	US-CO-2007	USA	SRR1561301	Bowers et al.	human		2007	PRESENT	PRESENT	PRESENT	PRESENT	PRESENT	PRESENT	PRESENT	PRESENT	PRESENT
SRR1561300	Klebsiella pneumoniae	US-CA-2011	USA	SRR1561300	Bowers et al.	human		2011	PRESENT	PRESENT	PRESENT	PRESENT	PRESENT	PRESENT	PRESENT	PRESENT	PRESENT
SRR1561299	Klebsiella pneumoniae	US-CA-2010b	USA	SRR1561299	Bowers et al.	human		2010	PRESENT	PRESENT	PRESENT	PRESENT	PRESENT	PRESENT	PRESENT	PRESENT	PRESENT
SRR1561298	Klebsiella pneumoniae	US-CA-2010a	USA	SRR1561298	Bowers et al.	human		2010	PRESENT	PRESENT	PRESENT	PRESENT	PRESENT	PRESENT	PRESENT	PRESENT	PRESENT
SRR1561297	Klebsiella pneumoniae	US-CA-2008	USA	SRR1561297	Bowers et al.	human		2008	PRESENT	PRESENT	PRESENT	PRESENT	PRESENT	PRESENT	PRESENT	PRESENT	PRESENT
SRR1561296	Klebsiella pneumoniae	US-CA-2007b	USA	SRR1561296	Bowers et al.	human		2007	PRESENT	PRESENT	PRESENT	PRESENT	PRESENT	PRESENT	PRESENT	PRESENT	PRESENT
SRR1561295	Klebsiella pneumoniae	US-CA-2007a	USA	SRR1561295	Bowers et al.	human		2007	PRESENT	PRESENT	PRESENT	PRESENT	PRESENT	PRESENT	PRESENT	PRESENT	PRESENT
SRR1561294	Klebsiella pneumoniae	US-AZ-2006b	USA	SRR1561294	Bowers et al.	human		2006	PRESENT	PRESENT	PRESENT	PRESENT	PRESENT	PRESENT	PRESENT	PRESENT	PRESENT
SRR1561293	Klebsiella pneumoniae	US-AZ-2006a	USA	SRR1561293	Bowers et al.	human		2006	PRESENT	PRESENT	PRESENT	PRESENT	PRESENT	PRESENT	PRESENT	PRESENT	PRESENT
SRR1561292	Klebsiella pneumoniae	Thailand-2008i	Thailand	SRR1561292	Bowers et al.	human		2008	PRESENT	PARTIAL	PRESENT	PRESENT	PRESENT	PRESENT	AMBIGUOUS	CONTIG	ABSENT
SRR1561291	Klebsiella pneumoniae	Thailand-2008h	Thailand	SRR1561291	Bowers et al.	human		2008	PRESENT	PRESENT	PRESENT	PRESENT	PRESENT	CONTIG	PARTIAL	PRESENT	ABSENT
SRR1561290	Klebsiella pneumoniae	Thailand-2008g	Thailand	SRR1561290	Bowers et al.	human		2008	PRESENT	PARTIAL	PRESENT	PRESENT	PRESENT	AMBIGUOUS	PARTIAL	CONTIG	ABSENT
SRR1561289	Klebsiella pneumoniae	Thailand-2008f	Thailand	SRR1561289	Bowers et al.	human		2008	PRESENT	PRESENT	PRESENT	PRESENT	PRESENT	CONTIG	PARTIAL	PRESENT	ABSENT
SRR1561287	Klebsiella pneumoniae	Thailand-2008d	Thailand	SRR1561287	Bowers et al.	human		2008	PRESENT	CONTIG	PRESENT	PRESENT	PRESENT	CONTIG	ABSENT	CONTIG	ABSENT
SRR1561286	Klebsiella pneumoniae	Thailand-2008c	Thailand	SRR1561286	Bowers et al.			2008	PRESENT	PARTIAL	PARTIAL	PRESENT	CONTIG	ABSENT	ABSENT	ABSENT	ABSENT
SRR1561285	Klebsiella pneumoniae	Thailand-2008b	Thailand	SRR1561285	Bowers et al.	human		2008	PRESENT	CONTIG	PRESENT	PRESENT	PRESENT	PRESENT	AMBIGUOUS	CONTIG	CONTIG
SRR1561284	Klebsiella pneumoniae	Thailand-2008a	Thailand	SRR1561284	Bowers et al.	human		2008	PRESENT	PARTIAL	PRESENT	PRESENT	PRESENT	AMBIGUOUS	PARTIAL	PRESENT	ABSENT
SRR1561283	Klebsiella pneumoniae	Thailand-2007	Thailand	SRR1561283	Bowers et al.	human		2007	PRESENT	PARTIAL	PRESENT	PRESENT	PRESENT	AMBIGUOUS	CONTIG	CONTIG	ABSENT
SRR1561282	Klebsiella pneumoniae	Singapore-2008	Singapore	SRR1561282	Bowers et al.	human		2008	PRESENT	PARTIAL	PARTIAL	PRESENT	PRESENT	PARTIAL	AMBIGUOUS	ABSENT	ABSENT
SRR1561281	Klebsiella pneumoniae	Poland-2009e	Poland	SRR1561281	Bowers et al.	human		2009	PRESENT	CONTIG	PRESENT	PRESENT	PRESENT	CONTIG	PARTIAL	CONTIG	ABSENT
SRR1561280	Klebsiella pneumoniae	Poland-2009d	Poland	SRR1561280	Bowers et al.	human		2009	PRESENT	PRESENT	PRESENT	PRESENT	PRESENT	CONTIG	PRESENT	PRESENT	ABSENT
SRR1561279	Klebsiella pneumoniae	Poland-2009c	Poland	SRR1561279	Bowers et al.			2009	PRESENT	PARTIAL	PRESENT	PRESENT	PRESENT	PARTIAL	AMBIGUOUS	ABSENT	ABSENT
SRR1561278	Klebsiella pneumoniae	Poland-2009b	Poland	SRR1561278	Bowers et al.	human		2009	PRESENT	CONTIG	PARTIAL	PRESENT	PRESENT	CONTIG	AMBIGUOUS	ABSENT	ABSENT
SRR1561277	Klebsiella pneumoniae	Poland-2009a	Poland	SRR1561277	Bowers et al.	human		2009	PRESENT	PARTIAL	PRESENT	PRESENT	PRESENT	CONTIG	CONTIG	CONTIG	ABSENT
SRR1561276	Klebsiella pneumoniae	Poland-2008	Poland	SRR1561276	Bowers et al.	human		2008	PRESENT	CONTIG	PRESENT	PRESENT	PRESENT	PRESENT	PARTIAL	CONTIG	CONTIG
SRR1561275	Klebsiella pneumoniae	Philippines-2009	Philippines	SRR1561275	Bowers et al.			2009	PRESENT	CONTIG	PRESENT	PRESENT	PRESENT	CONTIG	PARTIAL	CONTIG	ABSENT
SRR1561274	Klebsiella pneumoniae	Malaysia-2009	Malaysia	SRR1561274	Bowers et al.	human		2009	PRESENT	CONTIG	PRESENT	PRESENT	PRESENT	PRESENT	PARTIAL	CONTIG	CONTIG
SRR1561273	Klebsiella pneumoniae	Malaysia-2008	Malaysia	SRR1561273	Bowers et al.			2008	PRESENT	ABSENT	PARTIAL	CONTIG	AMBIGUOUS	ABSENT	ABSENT	ABSENT	ABSENT
SRR1561271	Klebsiella pneumoniae	Italy-Palermo-2011j	Italy	SRR1561271	Bowers et al.	human		2011	PRESENT	PRESENT	PRESENT	PRESENT	PRESENT	PRESENT	PRESENT	PRESENT	PRESENT
SRR1561270	Klebsiella pneumoniae	Italy-Palermo-2011i	Italy	SRR1561270	Bowers et al.	human		2011	PRESENT	PRESENT	PRESENT	PRESENT	PRESENT	PRESENT	PRESENT	PRESENT	PRESENT
SRR1561269	Klebsiella pneumoniae	Italy-Palermo-2011h	Italy	SRR1561269	Bowers et al.	human		2011	PRESENT	PRESENT	PRESENT	PRESENT	PRESENT	PRESENT	PRESENT	PRESENT	PRESENT
SRR1561268	Klebsiella pneumoniae	Italy-Palermo-2011g	Italy	SRR1561268	Bowers et al.	human		2011	PRESENT	PRESENT	PRESENT	PRESENT	PRESENT	PRESENT	PRESENT	PRESENT	PRESENT
SRR1561267	Klebsiella pneumoniae	Italy-Palermo-2011f	Italy	SRR1561267	Bowers et al.	human		2011	PRESENT	PRESENT	PRESENT	PRESENT	PRESENT	PRESENT	PRESENT	PRESENT	PRESENT
SRR1561266	Klebsiella pneumoniae	Italy-Palermo-2011e	Italy	SRR1561266	Bowers et al.	human		2011	PRESENT	PRESENT	PRESENT	PRESENT	PRESENT	PRESENT	PRESENT	PRESENT	PRESENT
SRR1561265	Klebsiella pneumoniae	Italy-Palermo-2011d	Italy	SRR1561265	Bowers et al.	human		2011	PRESENT	PRESENT	PRESENT	PRESENT	PRESENT	PRESENT	PRESENT	PRESENT	PRESENT
SRR1561264	Klebsiella pneumoniae	Italy-Palermo-2011c	Italy	SRR1561264	Bowers et al.	human		2011	PRESENT	PRESENT	PRESENT	PRESENT	PRESENT	PRESENT	PRESENT	PRESENT	PRESENT
SRR1561263	Klebsiella pneumoniae	Italy-Palermo-2011b	Italy	SRR1561263	Bowers et al.	human		2011	PRESENT	PRESENT	PRESENT	PRESENT	PRESENT	PRESENT	PRESENT	PRESENT	PRESENT
SRR1561262	Klebsiella pneumoniae	Italy-Palermo-2011a	Italy	SRR1561262	Bowers et al.	human		2011	PRESENT	PRESENT	PRESENT	PRESENT	PRESENT	PRESENT	PRESENT	PRESENT	PRESENT
SRR1561260	Klebsiella pneumoniae	Italy-Palermo-2010d	Italy	SRR1561260	Bowers et al.	human		2010	PRESENT	PRESENT	PRESENT	PRESENT	PRESENT	PRESENT	PRESENT	PRESENT	PRESENT
SRR1561259	Klebsiella pneumoniae	Italy-Palermo-2010c	Italy	SRR1561259	Bowers et al.	human		2010	PRESENT	PRESENT	PRESENT	PRESENT	PRESENT	PRESENT	PRESENT	PRESENT	PRESENT
SRR1561258	Klebsiella pneumoniae	Italy-Palermo-2010b	Italy	SRR1561258	Bowers et al.	human		2010	PRESENT	PRESENT	PRESENT	PRESENT	PRESENT	PRESENT	PRESENT	PRESENT	PRESENT
SRR1561257	Klebsiella pneumoniae	Italy-Palermo-2010a	Italy	SRR1561257	Bowers et al.	human		2010	PRESENT	PRESENT	PRESENT	PRESENT	PRESENT	PRESENT	PRESENT	PRESENT	ABSENT
SRR1561256	Klebsiella pneumoniae	Italy-Palermo-2009l	Italy	SRR1561256	Bowers et al.	human		2009	PRESENT	PRESENT	PRESENT	PRESENT	PRESENT	PRESENT	PRESENT	PRESENT	PRESENT
SRR1561255	Klebsiella pneumoniae	Italy-Palermo-2009k	Italy	SRR1561255	Bowers et al.	human		2009	PRESENT	PRESENT	PRESENT	PRESENT	PRESENT	PRESENT	PRESENT	PRESENT	PRESENT
SRR1561254	Klebsiella pneumoniae	Italy-Palermo-2009j	Italy	SRR1561254	Bowers et al.	human		2009	PRESENT	PRESENT	PRESENT	PRESENT	PRESENT	PRESENT	PRESENT	PRESENT	PRESENT
SRR1561253	Klebsiella pneumoniae	Italy-Palermo-2009i	Italy	SRR1561253	Bowers et al.	human		2009	PRESENT	PRESENT	PRESENT	PRESENT	PRESENT	PRESENT	PRESENT	PRESENT	PRESENT
SRR1561252	Klebsiella pneumoniae	Italy-Palermo-2009h	Italy	SRR1561252	Bowers et al.	human		2009	PRESENT	PRESENT	PRESENT	PRESENT	PRESENT	PRESENT	PRESENT	PRESENT	PRESENT
SRR1561251	Klebsiella pneumoniae	Italy-Palermo-2009g	Italy	SRR1561251	Bowers et al.	human		2009	PRESENT	PRESENT	PRESENT	PRESENT	PRESENT	PRESENT	PRESENT	PRESENT	PRESENT
SRR1561250	Klebsiella pneumoniae	Italy-Palermo-2009f	Italy	SRR1561250	Bowers et al.	human		2009	PRESENT	PRESENT	PRESENT	PRESENT	PRESENT	PRESENT	PRESENT	PRESENT	PRESENT
SRR1561249	Klebsiella pneumoniae	Italy-Palermo-2009e	Italy	SRR1561249	Bowers et al.	human		2009	PRESENT	PRESENT	PRESENT	PRESENT	PRESENT	PRESENT	PRESENT	PRESENT	PRESENT
SRR1561248	Klebsiella pneumoniae	Italy-Palermo-2009d	Italy	SRR1561248	Bowers et al.	human		2009	PRESENT	PRESENT	PRESENT	PRESENT	PRESENT	PRESENT	PRESENT	PRESENT	PRESENT
SRR1561247	Klebsiella pneumoniae	Italy-Palermo-2009c	Italy	SRR1561247	Bowers et al.	human		2009	PRESENT	PRESENT	PRESENT	PRESENT	PRESENT	PRESENT	PRESENT	PRESENT	PRESENT
SRR1561246	Klebsiella pneumoniae	Italy-Palermo-2009b	Italy	SRR1561246	Bowers et al.	human		2009	PRESENT	PRESENT	PRESENT	PRESENT	PRESENT	PRESENT	PRESENT	PRESENT	PRESENT
SRR1561245	Klebsiella pneumoniae	Italy-Palermo-2009a	Italy	SRR1561245	Bowers et al.	human		2009	PRESENT	PRESENT	PRESENT	PRESENT	PRESENT	PRESENT	PRESENT	PRESENT	PRESENT
SRR1561244	Klebsiella pneumoniae	Italy-Palermo-2008	Italy	SRR1561244	Bowers et al.	human		2008	PRESENT	PRESENT	PRESENT	PRESENT	PRESENT	PRESENT	PRESENT	PRESENT	PRESENT
SRR1561243	Klebsiella pneumoniae	Italy-2011c	Italy	SRR1561243	Bowers et al.	human		2011	PRESENT	CONTIG	PRESENT	PRESENT	PRESENT	AMBIGUOUS	AMBIGUOUS	CONTIG	ABSENT
SRR1561242	Klebsiella pneumoniae	Italy-2011b	Italy	SRR1561242	Bowers et al.	human		2011	PRESENT	CONTIG	PRESENT	PRESENT	PRESENT	PRESENT	PRESENT	CONTIG	PRESENT
SRR1561241	Klebsiella pneumoniae	Italy-2011a	Italy	SRR1561241	Bowers et al.	human		2011	PRESENT	PARTIAL	PRESENT	PRESENT	PRESENT	CONTIG	AMBIGUOUS	PRESENT	ABSENT
SRR1561240	Klebsiella pneumoniae	Italy-2009	Italy	SRR1561240	Bowers et al.	human		2009	PRESENT	PRESENT	PARTIAL	PRESENT	PRESENT	CONTIG	ABSENT	ABSENT	ABSENT
SRR1561239	Klebsiella pneumoniae	Italy-2008	Italy	SRR1561239	Bowers et al.	human		2008	PRESENT	PARTIAL	PRESENT	PRESENT	PRESENT	PRESENT	PRESENT	CONTIG	PRESENT
SRR1561238	Klebsiella pneumoniae	Israel-2007d	Israel	SRR1561238	Bowers et al.	human		2007	PRESENT	PRESENT	PRESENT	PRESENT	PRESENT	PRESENT	PRESENT	PRESENT	PRESENT
SRR1561237	Klebsiella pneumoniae	Israel-2007c	Israel	SRR1561237	Bowers et al.	human		2007	PRESENT	PRESENT	PRESENT	PRESENT	PRESENT	PRESENT	PRESENT	PRESENT	PRESENT
SRR1561236	Klebsiella pneumoniae	Israel-2007b	Israel	SRR1561236	Bowers et al.	human		2007	PRESENT	PRESENT	PRESENT	PRESENT	PRESENT	PRESENT	PRESENT	PRESENT	PRESENT
SRR1561234	Klebsiella pneumoniae	Indonesia-2008	Indonesia	SRR1561234	Bowers et al.			2008	PRESENT	CONTIG	STOPS	PRESENT	PRESENT	PRESENT	ABSENT	ABSENT	ABSENT
SRR1561233	Klebsiella pneumoniae	India-2008c	India	SRR1561233	Bowers et al.	human		2008	PRESENT	CONTIG	PRESENT	PRESENT	PRESENT	CONTIG	AMBIGUOUS	CONTIG	ABSENT
SRR1561232	Klebsiella pneumoniae	India-2008b	India	SRR1561232	Bowers et al.	human		2008	PRESENT	PRESENT	PRESENT	PRESENT	PRESENT	PRESENT	PARTIAL	PRESENT	CONTIG
SRR1561231	Klebsiella pneumoniae	India-2008a	India	SRR1561231	Bowers et al.			2008	PRESENT	CONTIG	PARTIAL	PRESENT	PRESENT	ABSENT	AMBIGUOUS	ABSENT	ABSENT
SRR1561230	Klebsiella pneumoniae	India-2007b	India	SRR1561230	Bowers et al.	human		2007	PRESENT	STOPS	PRESENT	PRESENT	PRESENT	PRESENT	PRESENT	PRESENT	PRESENT
SRR1561228	Klebsiella pneumoniae	Hong Kong-2008	Hong Kong	SRR1561228	Bowers et al.	human		2008	PRESENT	PARTIAL	PRESENT	PRESENT	PRESENT	CONTIG	PARTIAL	CONTIG	ABSENT
SRR1561227	Klebsiella pneumoniae	Guatemala-2009	Guatemala	SRR1561227	Bowers et al.	human		2009	PRESENT	PRESENT	PRESENT	PRESENT	PRESENT	PRESENT	PRESENT	PRESENT	PRESENT
SRR1561226	Klebsiella pneumoniae	Greece-2011	Greece	SRR1561226	Bowers et al.	human		2011	PRESENT	PARTIAL	PRESENT	PRESENT	PRESENT	PRESENT	PARTIAL	CONTIG	CONTIG
SRR1561225	Klebsiella pneumoniae	Greece-2010	Greece	SRR1561225	Bowers et al.	human		2010	PRESENT	CONTIG	PRESENT	PRESENT	PRESENT	AMBIGUOUS	PARTIAL	CONTIG	ABSENT
SRR1561224	Klebsiella pneumoniae	Greece-2009	Greece	SRR1561224	Bowers et al.			2009	PRESENT	PARTIAL	PRESENT	PRESENT	STOPS	CONTIG	AMBIGUOUS	ABSENT	ABSENT
SRR1561223	Klebsiella pneumoniae	Greece-2008	Greece	SRR1561223	Bowers et al.	human		2008	PRESENT	PARTIAL	PRESENT	PRESENT	PRESENT	PARTIAL	PRESENT	PRESENT	ABSENT
SRR1561222	Klebsiella pneumoniae	Greece-2007	Greece	SRR1561222	Bowers et al.	human		2007	PRESENT	PRESENT	PRESENT	PRESENT	PRESENT	PARTIAL	AMBIGUOUS	PRESENT	ABSENT
SRR1561221	Klebsiella pneumoniae	Finland-2009c	Finland	SRR1561221	Bowers et al.	human		2009	PRESENT	PRESENT	PRESENT	PRESENT	PRESENT	PRESENT	PRESENT	PRESENT	PRESENT
SRR1561220	Klebsiella pneumoniae	Finland-2009b	Finland	SRR1561220	Bowers et al.	human		2009	PRESENT	PARTIAL	PRESENT	PRESENT	PRESENT	CONTIG	PARTIAL	CONTIG	ABSENT
SRR1561219	Klebsiella pneumoniae	Finland-2009a	Finland	SRR1561219	Bowers et al.	human		2009	PRESENT	PARTIAL	PRESENT	PRESENT	PRESENT	CONTIG	AMBIGUOUS	CONTIG	ABSENT
SRR1561218	Klebsiella pneumoniae	Denmark-2009b	Denmark	SRR1561218	Bowers et al.	human		2009	PRESENT	PARTIAL	PRESENT	PRESENT	PRESENT	PRESENT	PARTIAL	CONTIG	CONTIG
SRR1561217	Klebsiella pneumoniae	Denmark-2009a	Denmark	SRR1561217	Bowers et al.	human		2009	PRESENT	PRESENT	PRESENT	PRESENT	PRESENT	PARTIAL	PRESENT	PRESENT	ABSENT
SRR1561216	Klebsiella pneumoniae	Colombia-2009b	Colombia	SRR1561216	Bowers et al.	human		2009	PRESENT	PRESENT	PRESENT	PRESENT	PRESENT	PRESENT	PRESENT	PRESENT	PRESENT
SRR1561215	Klebsiella pneumoniae	Colombia-2009a	Colombia	SRR1561215	Bowers et al.	human		2009	PRESENT	PRESENT	PRESENT	PRESENT	PRESENT	PRESENT	PRESENT	PRESENT	PRESENT
SRR1561214	Klebsiella pneumoniae	Canada-2009d	Canada	SRR1561214	Bowers et al.	human		2009	PRESENT	PRESENT	PRESENT	PRESENT	PRESENT	PRESENT	PRESENT	PRESENT	PRESENT
SRR1561213	Klebsiella pneumoniae	Canada-2009c	Canada	SRR1561213	Bowers et al.	human		2009	PRESENT	PRESENT	PRESENT	PRESENT	PRESENT	PRESENT	PRESENT	PRESENT	PRESENT
SRR1561212	Klebsiella pneumoniae	Canada-2009b	Canada	SRR1561212	Bowers et al.	human		2009	PRESENT	PRESENT	PRESENT	PRESENT	PRESENT	PRESENT	PRESENT	PRESENT	PRESENT
SRR1561211	Klebsiella pneumoniae	Canada-2009a	Canada	SRR1561211	Bowers et al.	human		2009	PRESENT	CONTIG	PRESENT	PRESENT	PRESENT	PRESENT	PRESENT	CONTIG	PRESENT
SRR1561210	Klebsiella pneumoniae	Brazil-2010e	Brazil	SRR1561210	Bowers et al.	human		2010	PRESENT	CONTIG	PRESENT	PRESENT	PRESENT	PRESENT	PARTIAL	CONTIG	CONTIG
SRR1561209	Klebsiella pneumoniae	Brazil-2010d	Brazil	SRR1561209	Bowers et al.	human		2010	PRESENT	PARTIAL	PRESENT	PRESENT	PRESENT	PRESENT	PRESENT	PRESENT	PRESENT
SRR1561208	Klebsiella pneumoniae	Brazil-2010c	Brazil	SRR1561208	Bowers et al.	human		2010	PRESENT	PRESENT	PRESENT	PRESENT	PRESENT	PRESENT	PRESENT	PRESENT	PRESENT
SRR1561207	Klebsiella pneumoniae	Brazil-2010b	Brazil	SRR1561207	Bowers et al.	human		2010	PRESENT	PRESENT	PRESENT	PRESENT	PRESENT	PRESENT	PRESENT	PRESENT	PRESENT
SRR1561206	Klebsiella pneumoniae	Brazil-2010a	Brazil	SRR1561206	Bowers et al.	human		2010	PRESENT	PRESENT	PRESENT	PRESENT	PRESENT	PRESENT	PRESENT	PRESENT	PRESENT
SRR1561205	Klebsiella pneumoniae	Brazil-2009b	Brazil	SRR1561205	Bowers et al.	human		2009	PRESENT	PRESENT	PRESENT	PRESENT	PRESENT	PRESENT	PRESENT	PRESENT	PRESENT
SRR1561204	Klebsiella pneumoniae	Brazil-2009a	Brazil	SRR1561204	Bowers et al.	human		2009	PRESENT	PRESENT	PRESENT	PRESENT	PRESENT	PRESENT	PARTIAL	PRESENT	CONTIG
SRR1561203	Klebsiella pneumoniae	Brazil-2008b	Brazil	SRR1561203	Bowers et al.	human		2008	PRESENT	PRESENT	PRESENT	PRESENT	PRESENT	PRESENT	PRESENT	PRESENT	PRESENT
SRR1561202	Klebsiella pneumoniae	Brazil-2008a	Brazil	SRR1561202	Bowers et al.	human		2008	PRESENT	PRESENT	PRESENT	PRESENT	PRESENT	PRESENT	PRESENT	PRESENT	PRESENT
SRR1561201	Klebsiella pneumoniae	Brazil-2007b	Brazil	SRR1561201	Bowers et al.	human		2007	PRESENT	PRESENT	PRESENT	PRESENT	PRESENT	STOPS	PARTIAL	PRESENT	CONTIG
SRR1561200	Klebsiella pneumoniae	Brazil-2007a	Brazil	SRR1561200	Bowers et al.	human		2007	PRESENT	CONTIG	PRESENT	PRESENT	PRESENT	CONTIG	PRESENT	CONTIG	ABSENT
SRR1561199	Klebsiella pneumoniae	Brazil-2006	Brazil	SRR1561199	Bowers et al.	human		2006	PRESENT	PRESENT	PRESENT	PRESENT	PRESENT	PRESENT	PRESENT	PRESENT	PRESENT
SRR1561198	Klebsiella pneumoniae	Australia-2010	Australia	SRR1561198	Bowers et al.	human		2010	PRESENT	PRESENT	PRESENT	PRESENT	PRESENT	PRESENT	AMBIGUOUS	PRESENT	CONTIG
SRR1508883	Klebsiella pneumoniae	C5243	Nepal	SRR1508883	Stoesser et al. 2014	human	infection	2008	PRESENT	PRESENT	PRESENT	PRESENT	PRESENT	PRESENT	PRESENT	PRESENT	PRESENT
SRR1508882	Klebsiella pneumoniae	C5250	Nepal	SRR1508882	Stoesser et al. 2014	human	infection	2008	PRESENT	PRESENT	PRESENT	PRESENT	PRESENT	PRESENT	PRESENT	PRESENT	PRESENT
SRR1508881	Klebsiella pneumoniae	C369	Nepal	SRR1508881	Stoesser et al. 2014	human	infection	2009	PRESENT	PRESENT	PRESENT	PRESENT	PRESENT	PRESENT	PRESENT	PRESENT	PRESENT
SRR1508877	Klebsiella pneumoniae	H1167	Nepal	SRR1508877	Stoesser et al. 2014	human	infection	2011	PRESENT	PRESENT	PRESENT	PRESENT	PRESENT	PRESENT	PRESENT	PRESENT	PRESENT
SRR1508876	Klebsiella pneumoniae	H1265	Nepal	SRR1508876	Stoesser et al. 2014	human	infection	2011	PRESENT	PRESENT	PRESENT	PRESENT	PRESENT	PRESENT	PRESENT	PRESENT	PRESENT
SRR1508874	Klebsiella pneumoniae	H1277	Nepal	SRR1508874	Stoesser et al. 2014	human	infection	2011	PRESENT	PRESENT	PRESENT	PRESENT	PRESENT	PRESENT	PRESENT	PRESENT	PRESENT
SRR1508873	Klebsiella pneumoniae	H1271	Nepal	SRR1508873	Stoesser et al. 2014	human	infection	2011	PRESENT	PRESENT	PRESENT	PRESENT	PRESENT	PRESENT	PRESENT	PRESENT	PRESENT
SRR1508872	Klebsiella pneumoniae	H1263	Nepal	SRR1508872	Stoesser et al. 2014	human	infection	2011	PRESENT	PRESENT	PRESENT	PRESENT	PRESENT	PRESENT	PRESENT	PRESENT	PRESENT
SRR1508866	Klebsiella pneumoniae	C1046	Nepal	SRR1508866	Stoesser et al. 2014	human	infection	2011	PRESENT	PRESENT	PRESENT	PRESENT	PRESENT	PRESENT	PRESENT	PRESENT	PRESENT
SRR1508865	Klebsiella pneumoniae	H1438	Nepal	SRR1508865	Stoesser et al. 2014	human	infection	2012	PRESENT	PRESENT	PRESENT	PRESENT	PRESENT	PRESENT	PRESENT	PRESENT	PRESENT
SRR1508864	Klebsiella pneumoniae	H1183	Nepal	SRR1508864	Stoesser et al. 2014	human	infection	2011	PRESENT	PRESENT	PRESENT	PRESENT	PRESENT	PRESENT	PRESENT	PRESENT	PRESENT
SRR1508863	Klebsiella pneumoniae	H1545	Nepal	SRR1508863	Stoesser et al. 2014	human	infection	2012	PRESENT	PRESENT	PRESENT	PRESENT	PRESENT	PRESENT	PRESENT	PRESENT	PRESENT
SRR1508862	Klebsiella pneumoniae	H1496	Nepal	SRR1508862	Stoesser et al. 2014	human	infection	2012	PRESENT	PRESENT	PRESENT	PRESENT	PRESENT	PRESENT	PRESENT	PRESENT	PRESENT
SRR1508861	Klebsiella pneumoniae	H1460	Nepal	SRR1508861	Stoesser et al. 2014	human	infection	2012	PRESENT	PRESENT	PRESENT	PRESENT	PRESENT	PRESENT	PRESENT	PRESENT	PRESENT
SRR1508860	Klebsiella pneumoniae	H1360	Nepal	SRR1508860	Stoesser et al. 2014	human	infection	2012	PRESENT	PRESENT	PRESENT	PRESENT	PRESENT	PRESENT	PRESENT	PRESENT	PRESENT
SRR1508859	Klebsiella pneumoniae	H1361	Nepal	SRR1508859	Stoesser et al. 2014	human	infection	2012	PRESENT	PRESENT	PRESENT	PRESENT	PRESENT	PRESENT	PRESENT	PRESENT	PRESENT
SRR1508858	Klebsiella pneumoniae	H1247	Nepal	SRR1508858	Stoesser et al. 2014	human	infection	2011	PRESENT	PRESENT	PRESENT	PRESENT	PRESENT	PRESENT	PRESENT	PRESENT	PRESENT
SRR1508857	Klebsiella pneumoniae	H1267	Nepal	SRR1508857	Stoesser et al. 2014	human	infection	2011	PRESENT	PRESENT	PRESENT	PRESENT	PRESENT	PRESENT	PRESENT	PRESENT	PRESENT
SRR1508855	Klebsiella pneumoniae	H32	Nepal	SRR1508855	Stoesser et al. 2014	human	infection	2012	PRESENT	PRESENT	PRESENT	PRESENT	PRESENT	PRESENT	PRESENT	PRESENT	PRESENT
SRR1508854	Klebsiella pneumoniae	H31	Nepal	SRR1508854	Stoesser et al. 2014	human	infection	2012	PRESENT	PRESENT	PRESENT	PRESENT	PRESENT	PRESENT	PRESENT	PRESENT	PRESENT
SRR1508853	Klebsiella pneumoniae	H30	Nepal	SRR1508853	Stoesser et al. 2014	human	infection	2011	PRESENT	PRESENT	PRESENT	PRESENT	PRESENT	PRESENT	PRESENT	PRESENT	PRESENT
SRR1508852	Klebsiella pneumoniae	PMK26b	Nepal	SRR1508852	Stoesser et al. 2014	human	infection	2012	PRESENT	PRESENT	PRESENT	PRESENT	PRESENT	PRESENT	PRESENT	PRESENT	PRESENT
SRR1508851	Klebsiella pneumoniae	PMK26a	Nepal	SRR1508851	Stoesser et al. 2014	human	infection	2012	PRESENT	PRESENT	PRESENT	PRESENT	PRESENT	PRESENT	PRESENT	PRESENT	PRESENT
SRR1508850	Klebsiella pneumoniae	PMK25	Nepal	SRR1508850	Stoesser et al. 2014	human	infection	2012	PRESENT	PRESENT	PRESENT	PRESENT	PRESENT	PRESENT	PRESENT	PRESENT	PRESENT
SRR1508849	Klebsiella pneumoniae	PMK24	Nepal	SRR1508849	Stoesser et al. 2014	human	infection	2012	PRESENT	PRESENT	PRESENT	PRESENT	PRESENT	PRESENT	PRESENT	PRESENT	PRESENT
SRR1508848	Klebsiella pneumoniae	PMK23	Nepal	SRR1508848	Stoesser et al. 2014	human	infection	2012	PRESENT	PRESENT	PRESENT	PRESENT	PRESENT	PRESENT	PRESENT	PRESENT	PRESENT
SRR1508847	Klebsiella pneumoniae	PMK22	Nepal	SRR1508847	Stoesser et al. 2014	human	infection	2012	PRESENT	PRESENT	PRESENT	PRESENT	PRESENT	PRESENT	PRESENT	PRESENT	PRESENT
SRR1508846	Klebsiella pneumoniae	PMK21e	Nepal	SRR1508846	Stoesser et al. 2014	human	infection	2012	PRESENT	PRESENT	PRESENT	PRESENT	PRESENT	PRESENT	PRESENT	PRESENT	PRESENT
SRR1508845	Klebsiella pneumoniae	PMK21d	Nepal	SRR1508845	Stoesser et al. 2014	human	infection	2012	PRESENT	PRESENT	PRESENT	PRESENT	PRESENT	PRESENT	PRESENT	PRESENT	PRESENT
SRR1508844	Klebsiella pneumoniae	PMK21c	Nepal	SRR1508844	Stoesser et al. 2014	human	infection	2012	PRESENT	PRESENT	PRESENT	PRESENT	PRESENT	PRESENT	PRESENT	PRESENT	PRESENT
SRR1508843	Klebsiella pneumoniae	PMK21b	Nepal	SRR1508843	Stoesser et al. 2014	human	infection	2012	PRESENT	PRESENT	PRESENT	PRESENT	PRESENT	PRESENT	PRESENT	PRESENT	PRESENT
SRR1508842	Klebsiella pneumoniae	PMK21a	Nepal	SRR1508842	Stoesser et al. 2014	human	infection	2012	PRESENT	PRESENT	PRESENT	PRESENT	PRESENT	PRESENT	PRESENT	PRESENT	PRESENT
SRR1508841	Klebsiella pneumoniae	PMK20a	Nepal	SRR1508841	Stoesser et al. 2014	human	infection	2012	PRESENT	PRESENT	PRESENT	PRESENT	PRESENT	PRESENT	PRESENT	PRESENT	PRESENT
SRR1508840	Klebsiella pneumoniae	PMK19	Nepal	SRR1508840	Stoesser et al. 2014	human	infection	2012	PRESENT	PRESENT	PRESENT	PRESENT	PRESENT	PRESENT	PRESENT	PRESENT	PRESENT
SRR1508839	Klebsiella pneumoniae	PMK18	Nepal	SRR1508839	Stoesser et al. 2014	human	infection	2012	PRESENT	PRESENT	PRESENT	PRESENT	PRESENT	PRESENT	PRESENT	PRESENT	PRESENT
SRR1508838	Klebsiella pneumoniae	PMK17	Nepal	SRR1508838	Stoesser et al. 2014	human	infection	2012	PRESENT	PRESENT	PRESENT	PRESENT	PRESENT	PRESENT	PRESENT	PRESENT	PRESENT
SRR1508837	Klebsiella pneumoniae	PMK16	Nepal	SRR1508837	Stoesser et al. 2014	human	infection	2012	PRESENT	PRESENT	PRESENT	PRESENT	PRESENT	PRESENT	PRESENT	PRESENT	PRESENT
SRR1508836	Klebsiella pneumoniae	PMK15	Nepal	SRR1508836	Stoesser et al. 2014	human	infection	2012	PRESENT	PRESENT	PRESENT	PRESENT	PRESENT	PRESENT	PRESENT	PRESENT	PRESENT
SRR1508835	Klebsiella pneumoniae	PMK14	Nepal	SRR1508835	Stoesser et al. 2014	human	infection	2012	PRESENT	PRESENT	PRESENT	PRESENT	PRESENT	PRESENT	PRESENT	PRESENT	PRESENT
SRR1508834	Klebsiella pneumoniae	PMK13b	Nepal	SRR1508834	Stoesser et al. 2014	human	infection	2012	PRESENT	PRESENT	PRESENT	PRESENT	PRESENT	PRESENT	PRESENT	PRESENT	PRESENT
SRR1508833	Klebsiella pneumoniae	PMK13a	Nepal	SRR1508833	Stoesser et al. 2014	human	infection	2012	PRESENT	PRESENT	PRESENT	PRESENT	PRESENT	PRESENT	PRESENT	PRESENT	PRESENT
SRR1508832	Klebsiella pneumoniae	PMK12	Nepal	SRR1508832	Stoesser et al. 2014	human	infection	2012	PRESENT	PRESENT	PRESENT	PRESENT	PRESENT	PRESENT	PRESENT	PRESENT	PRESENT
SRR1508831	Klebsiella pneumoniae	PMK11	Nepal	SRR1508831	Stoesser et al. 2014	human	infection	2012	PRESENT	PRESENT	PRESENT	PRESENT	PRESENT	PRESENT	PRESENT	PRESENT	PRESENT
SRR1508830	Klebsiella pneumoniae	PMK10	Nepal	SRR1508830	Stoesser et al. 2014	human	infection	2012	PRESENT	PRESENT	PRESENT	PRESENT	PRESENT	PRESENT	PRESENT	PRESENT	PRESENT
SRR1508829	Klebsiella pneumoniae	PMK9	Nepal	SRR1508829	Stoesser et al. 2014	human	infection	2011	PRESENT	PRESENT	PRESENT	PRESENT	PRESENT	PRESENT	PRESENT	PRESENT	PRESENT
SRR1508827	Klebsiella pneumoniae	PMK7	Nepal	SRR1508827	Stoesser et al. 2014	human	infection	2011	PRESENT	PRESENT	PRESENT	PRESENT	PRESENT	PRESENT	PRESENT	PRESENT	PRESENT
SRR1508826	Klebsiella pneumoniae	PMK6	Nepal	SRR1508826	Stoesser et al. 2014	human	infection	2011	PRESENT	PRESENT	PRESENT	PRESENT	PRESENT	PRESENT	PRESENT	PRESENT	PRESENT
SRR1508825	Klebsiella pneumoniae	PMK5b	Nepal	SRR1508825	Stoesser et al. 2014	human	infection	2011	PRESENT	PRESENT	PRESENT	PRESENT	PRESENT	PRESENT	PRESENT	PRESENT	PRESENT
SRR1508824	Klebsiella pneumoniae	PMK5a	Nepal	SRR1508824	Stoesser et al. 2014	human	infection	2011	PRESENT	PRESENT	PRESENT	PRESENT	PRESENT	PRESENT	PRESENT	PRESENT	PRESENT
SRR1508823	Klebsiella pneumoniae	PMK4b	Nepal	SRR1508823	Stoesser et al. 2014	human	infection	2011	PRESENT	PRESENT	PRESENT	PRESENT	PRESENT	PRESENT	PRESENT	PRESENT	PRESENT
SRR1508822	Klebsiella pneumoniae	PMK4a	Nepal	SRR1508822	Stoesser et al. 2014	human	infection	2011	PRESENT	PRESENT	PRESENT	PRESENT	PRESENT	PRESENT	PRESENT	PRESENT	PRESENT
SRR1508821	Klebsiella pneumoniae	PMK3	Nepal	SRR1508821	Stoesser et al. 2014	human	infection	2011	PRESENT	PRESENT	PRESENT	PRESENT	PRESENT	PRESENT	PRESENT	PRESENT	PRESENT
SRR1508820	Klebsiella pneumoniae	H2	Nepal	SRR1508820	Stoesser et al. 2014	human	infection	2011	PRESENT	PRESENT	PRESENT	PRESENT	PRESENT	PRESENT	PRESENT	PRESENT	PRESENT
SRR1508819	Klebsiella pneumoniae	PMK1	Nepal	SRR1508819	Stoesser et al. 2014	human	infection	2011	PRESENT	PRESENT	PRESENT	PRESENT	PRESENT	PRESENT	PRESENT	PRESENT	PRESENT
SRR1167022	Klebsiella pneumoniae	1825_ST512	Colombia	SRR1167022	Deleo et al.	human	infection	2012	PRESENT	PRESENT	PRESENT	PRESENT	PRESENT	PRESENT	PRESENT	PRESENT	PRESENT
SRR1167021	Klebsiella pneumoniae	1824_ST258	USA	SRR1167021	Deleo et al.	human	infection	2012	PRESENT	PRESENT	PRESENT	PRESENT	PRESENT	PRESENT	PRESENT	PRESENT	PRESENT
SRR1167017	Klebsiella pneumoniae	1820_ST258	USA	SRR1167017	Deleo et al.	human	infection	2011	PRESENT	PRESENT	PRESENT	PRESENT	PRESENT	PRESENT	PRESENT	PRESENT	PRESENT
SRR1167016	Klebsiella pneumoniae	1819_ST258	USA	SRR1167016	Deleo et al.	human	infection	2011	PRESENT	PRESENT	PRESENT	PRESENT	PRESENT	PRESENT	PRESENT	PRESENT	PRESENT
SRR1167015	Klebsiella pneumoniae	1818_ST258	USA	SRR1167015	Deleo et al.	human	infection	2010	PRESENT	PRESENT	PRESENT	PRESENT	PRESENT	PRESENT	PRESENT	PRESENT	PRESENT
SRR1167014	Klebsiella pneumoniae	1817_ST258	USA	SRR1167014	Deleo et al.	human	infection	2010	PRESENT	PRESENT	PRESENT	PRESENT	PRESENT	PRESENT	PRESENT	PRESENT	PRESENT
SRR1167009	Klebsiella pneumoniae	1812_ST258	USA	SRR1167009	Deleo et al.	human	infection	2011	PRESENT	PRESENT	PRESENT	PRESENT	PRESENT	PRESENT	PRESENT	PRESENT	PRESENT
SRR1167008	Klebsiella pneumoniae	1811_ST258	USA	SRR1167008	Deleo et al.	human	infection	2010	PRESENT	PRESENT	PRESENT	PRESENT	PRESENT	PRESENT	PRESENT	PRESENT	PRESENT
SRR1167007	Klebsiella pneumoniae	1810_ST258	USA	SRR1167007	Deleo et al.	human	infection	2011	PRESENT	PRESENT	PRESENT	PRESENT	PRESENT	PRESENT	PRESENT	PRESENT	PRESENT
SRR1167006	Klebsiella pneumoniae	1809_ST258	USA	SRR1167006	Deleo et al.	human	infection	2010	PRESENT	PRESENT	PRESENT	PRESENT	PRESENT	PRESENT	PRESENT	PRESENT	PRESENT
SRR1167005	Klebsiella pneumoniae	1808_ST258	USA	SRR1167005	Deleo et al.	human	infection	2010	PRESENT	PRESENT	PRESENT	PRESENT	PRESENT	PRESENT	PRESENT	PRESENT	PRESENT
SRR1167004	Klebsiella pneumoniae	1807_ST258	USA	SRR1167004	Deleo et al.	human	infection	2010	PRESENT	PRESENT	PRESENT	PRESENT	PRESENT	PRESENT	PRESENT	PRESENT	PRESENT
SRR1167003	Klebsiella pneumoniae	1806_ST258	USA	SRR1167003	Deleo et al.	human	infection	2010	PRESENT	PRESENT	PRESENT	PRESENT	PRESENT	PRESENT	PRESENT	PRESENT	PRESENT
SRR1167002	Klebsiella pneumoniae	1805_ST258	USA	SRR1167002	Deleo et al.	human	infection	2010	PRESENT	PRESENT	PRESENT	PRESENT	PRESENT	PRESENT	PRESENT	PRESENT	PRESENT
SRR1167001	Klebsiella pneumoniae	1804_ST258	USA	SRR1167001	Deleo et al.	human	infection	2010	PRESENT	PRESENT	PRESENT	PRESENT	PRESENT	PRESENT	PRESENT	PRESENT	PRESENT
SRR1166999	Klebsiella pneumoniae	1802_ST258	USA	SRR1166999	Deleo et al.	human	infection	2011	PRESENT	PRESENT	PRESENT	PRESENT	PRESENT	PRESENT	PRESENT	PRESENT	PRESENT
SRR1166998	Klebsiella pneumoniae	1801_ST258	USA	SRR1166998	Deleo et al.	human	infection	2011	PRESENT	PRESENT	PRESENT	PRESENT	PRESENT	PRESENT	PRESENT	PRESENT	PRESENT
SRR1166997	Klebsiella pneumoniae	1800_ST258	USA	SRR1166997	Deleo et al.	human	infection	2010	PRESENT	PRESENT	PRESENT	PRESENT	PRESENT	PRESENT	PRESENT	PRESENT	PRESENT
SRR1166996	Klebsiella pneumoniae	1798_ST258	USA	SRR1166996	Deleo et al.	human	infection	2010	PRESENT	PRESENT	PRESENT	PRESENT	PRESENT	PRESENT	PRESENT	PRESENT	PRESENT
SRR1166995	Klebsiella pneumoniae	1797_ST258	USA	SRR1166995	Deleo et al.	human	infection	2010	PRESENT	PRESENT	PRESENT	PRESENT	PRESENT	PRESENT	PRESENT	PRESENT	PRESENT
SRR1166994	Klebsiella pneumoniae	1796_ST258	USA	SRR1166994	Deleo et al.	human	infection	2010	PRESENT	PRESENT	PRESENT	PRESENT	PRESENT	PRESENT	PRESENT	PRESENT	PRESENT
SRR1166993	Klebsiella pneumoniae	1795_ST258	Italy	SRR1166993	Deleo et al.	human	infection	2009	PRESENT	PRESENT	PRESENT	PRESENT	PRESENT	PRESENT	PRESENT	PRESENT	PRESENT
SRR1166992	Klebsiella pneumoniae	1794_ST258	USA	SRR1166992	Deleo et al.	human	infection	2009	PRESENT	PRESENT	PRESENT	PRESENT	PRESENT	PRESENT	PRESENT	PRESENT	PRESENT
SRR1166991	Klebsiella pneumoniae	1793_ST258	USA	SRR1166991	Deleo et al.	human	infection	2009	PRESENT	PRESENT	PRESENT	PRESENT	PRESENT	PRESENT	PRESENT	PRESENT	PRESENT
SRR1166990	Klebsiella pneumoniae	1792_ST512	Colombia	SRR1166990	Deleo et al.	human	infection	2010	PRESENT	PRESENT	PRESENT	PRESENT	PRESENT	PRESENT	PRESENT	PRESENT	PRESENT
SRR1166989	Klebsiella pneumoniae	1791_ST512	Colombia	SRR1166989	Deleo et al.	human	infection	2010	PRESENT	PRESENT	PRESENT	PRESENT	PRESENT	PRESENT	PRESENT	PRESENT	PRESENT
SRR1166988	Klebsiella pneumoniae	1790_ST258	USA	SRR1166988	Deleo et al.	human	infection	2011	PRESENT	PRESENT	PRESENT	PRESENT	PRESENT	PRESENT	PRESENT	PRESENT	PRESENT
SRR1166987	Klebsiella pneumoniae	1789_ST258	USA	SRR1166987	Deleo et al.	human	infection	2011	PRESENT	PRESENT	PRESENT	PRESENT	PRESENT	PRESENT	PRESENT	PRESENT	PRESENT
SRR1166986	Klebsiella pneumoniae	1788_ST258	USA	SRR1166986	Deleo et al.	human	infection	2011	PRESENT	PRESENT	PRESENT	PRESENT	PRESENT	PRESENT	PRESENT	PRESENT	PRESENT
SRR1166985	Klebsiella pneumoniae	1787_ST258	USA	SRR1166985	Deleo et al.	human	infection	2010	PRESENT	PRESENT	PRESENT	PRESENT	PRESENT	PRESENT	PRESENT	PRESENT	PRESENT
SRR1166984	Klebsiella pneumoniae	1786_ST258	USA	SRR1166984	Deleo et al.	human	infection	2010	PRESENT	PRESENT	PRESENT	PRESENT	PRESENT	PRESENT	PRESENT	PRESENT	PRESENT
SRR1166983	Klebsiella pneumoniae	1785_ST258	USA	SRR1166983	Deleo et al.	human	infection	2009	PRESENT	PRESENT	PRESENT	PRESENT	PRESENT	PRESENT	PRESENT	PRESENT	PRESENT
SRR1166982	Klebsiella pneumoniae	1784_ST258	USA	SRR1166982	Deleo et al.	human	infection	2008	PRESENT	PRESENT	PRESENT	PRESENT	PRESENT	PRESENT	PRESENT	PRESENT	PRESENT
SRR1166981	Klebsiella pneumoniae	1783_ST258	USA	SRR1166981	Deleo et al.	human	infection	2007	PRESENT	PRESENT	PRESENT	PRESENT	PRESENT	PRESENT	PRESENT	PRESENT	PRESENT
SRR1166980	Klebsiella pneumoniae	1782_ST258	USA	SRR1166980	Deleo et al.	human	infection	2006	PRESENT	PRESENT	PRESENT	PRESENT	PRESENT	PRESENT	PRESENT	PRESENT	PRESENT
SRR1166978	Klebsiella pneumoniae	1780_ST258	USA	SRR1166978	Deleo et al.	human	infection	2010	PRESENT	PRESENT	PRESENT	PRESENT	PRESENT	PRESENT	PRESENT	PRESENT	PRESENT
SRR1166977	Klebsiella pneumoniae	1779_ST258	USA	SRR1166977	Deleo et al.	human	infection	2010	PRESENT	PRESENT	PRESENT	PRESENT	PRESENT	PRESENT	PRESENT	PRESENT	PRESENT
SRR1166976	Klebsiella pneumoniae	1778_ST258	USA	SRR1166976	Deleo et al.	human	infection	2010	PRESENT	PRESENT	PRESENT	PRESENT	PRESENT	PRESENT	PRESENT	PRESENT	PRESENT
SRR1166975	Klebsiella pneumoniae	NJST258_1_ST258	USA	SRR1166975	Deleo et al.	human	infection	2010	PRESENT	PRESENT	PRESENT	PRESENT	STOPS	PRESENT	PRESENT	PRESENT	PRESENT
SRR1166974	Klebsiella pneumoniae	1776_ST258	USA	SRR1166974	Deleo et al.	human	infection	2009	PRESENT	PRESENT	PRESENT	PRESENT	PRESENT	PRESENT	PRESENT	PRESENT	PRESENT
SRR1166973	Klebsiella pneumoniae	1775_ST258	Canada	SRR1166973	Deleo et al.	human	infection	2009	PRESENT	PRESENT	PRESENT	PRESENT	PRESENT	PRESENT	PRESENT	PRESENT	PRESENT
SRR1166972	Klebsiella pneumoniae	1774_ST258	Canada	SRR1166972	Deleo et al.	human	infection	2009	PRESENT	PRESENT	PRESENT	PRESENT	PRESENT	PRESENT	PRESENT	PRESENT	PRESENT
SRR1166971	Klebsiella pneumoniae	1773_ST258	Canada	SRR1166971	Deleo et al.	human	infection	2007	PRESENT	PRESENT	PRESENT	PRESENT	PRESENT	PRESENT	PRESENT	PRESENT	PRESENT
SRR1166970	Klebsiella pneumoniae	1772_ST258	USA	SRR1166970	Deleo et al.	human	infection	2010	PRESENT	PRESENT	PRESENT	PRESENT	PRESENT	PRESENT	PRESENT	PRESENT	PRESENT
SRR1166969	Klebsiella pneumoniae	1771_ST258	USA	SRR1166969	Deleo et al.	human	infection	2010	PRESENT	PRESENT	PRESENT	PRESENT	PRESENT	PRESENT	PRESENT	PRESENT	PRESENT
SRR1166968	Klebsiella pneumoniae	1770_ST258	USA	SRR1166968	Deleo et al.	human	infection	2010	PRESENT	PRESENT	PRESENT	PRESENT	PRESENT	PRESENT	PRESENT	PRESENT	PRESENT
SRR1166967	Klebsiella pneumoniae	1769_ST258	USA	SRR1166967	Deleo et al.	human	infection	2009	PRESENT	PRESENT	PRESENT	PRESENT	PRESENT	PRESENT	PRESENT	PRESENT	PRESENT
SRR1166966	Klebsiella pneumoniae	1768_ST379	USA	SRR1166966	Deleo et al.	human	infection	2009	PRESENT	PRESENT	PRESENT	PRESENT	PRESENT	PRESENT	PRESENT	PRESENT	PRESENT
SRR1166965	Klebsiella pneumoniae	1767_ST379	USA	SRR1166965	Deleo et al.	human	infection	2009	PRESENT	PRESENT	PRESENT	PRESENT	PRESENT	PRESENT	PRESENT	PRESENT	PRESENT
SRR1166964	Klebsiella pneumoniae	1766_ST258	USA	SRR1166964	Deleo et al.	human	infection	2009	PRESENT	PRESENT	PRESENT	PRESENT	PRESENT	PRESENT	PRESENT	PRESENT	PRESENT
SRR1166963	Klebsiella pneumoniae	1765_ST258	USA	SRR1166963	Deleo et al.	human	infection	2009	PRESENT	PRESENT	PRESENT	PRESENT	PRESENT	PRESENT	PRESENT	PRESENT	PRESENT
SRR1166962	Klebsiella pneumoniae	1764_ST258	USA	SRR1166962	Deleo et al.	human	infection	2009	PRESENT	PRESENT	PRESENT	PRESENT	PRESENT	PRESENT	PRESENT	PRESENT	PRESENT
SRR1166961	Klebsiella pneumoniae	1763_ST379	USA	SRR1166961	Deleo et al.	human	infection	2009	PRESENT	PRESENT	PRESENT	PRESENT	PRESENT	PRESENT	PRESENT	PRESENT	PRESENT
SRR1166960	Klebsiella pneumoniae	1762_ST258	USA	SRR1166960	Deleo et al.	human	infection	2009	PRESENT	PRESENT	PRESENT	PRESENT	PRESENT	PRESENT	PRESENT	PRESENT	PRESENT
SRR1166959	Klebsiella pneumoniae	1761_ST258	USA	SRR1166959	Deleo et al.	human	infection	2009	PRESENT	PRESENT	PRESENT	PRESENT	PRESENT	PRESENT	PRESENT	PRESENT	PRESENT
SRR1166958	Klebsiella pneumoniae	1760_ST379	USA	SRR1166958	Deleo et al.	human	infection	2009	PRESENT	PRESENT	PRESENT	PRESENT	PRESENT	PRESENT	PRESENT	PRESENT	PRESENT
SRR1166957	Klebsiella pneumoniae	1759_ST258	USA	SRR1166957	Deleo et al.	human	infection	2009	PRESENT	PRESENT	PRESENT	PRESENT	PRESENT	PRESENT	PRESENT	PRESENT	PRESENT
SRR1166956	Klebsiella pneumoniae	1758_ST258	USA	SRR1166956	Deleo et al.	human	infection	2007	PRESENT	PRESENT	PRESENT	PRESENT	PRESENT	PRESENT	PRESENT	PRESENT	PRESENT
SRR1166955	Klebsiella pneumoniae	1757_ST258	USA	SRR1166955	Deleo et al.	human	infection	2007	PRESENT	PRESENT	PRESENT	PRESENT	PRESENT	PRESENT	PRESENT	PRESENT	PRESENT
SRR1166954	Klebsiella pneumoniae	1756_ST418	USA	SRR1166954	Deleo et al.	human	infection	2007	PRESENT	PRESENT	PRESENT	PRESENT	PRESENT	PRESENT	PRESENT	PRESENT	PRESENT
SRR1166953	Klebsiella pneumoniae	1755_ST258	USA	SRR1166953	Deleo et al.	human	infection	2007	PRESENT	PRESENT	PRESENT	PRESENT	PRESENT	PRESENT	PRESENT	PRESENT	PRESENT
SRR1166952	Klebsiella pneumoniae	1754_ST258	USA	SRR1166952	Deleo et al.	human	infection	2007	PRESENT	PRESENT	PRESENT	PRESENT	PRESENT	PRESENT	PRESENT	PRESENT	PRESENT
SRR1166951	Klebsiella pneumoniae	1753_ST258	USA	SRR1166951	Deleo et al.	human	infection	2006	PRESENT	PRESENT	PRESENT	PRESENT	PRESENT	PRESENT	PRESENT	PRESENT	PRESENT
SRR1166950	Klebsiella pneumoniae	1752_ST258	USA	SRR1166950	Deleo et al.	human	infection	2005	PRESENT	PRESENT	PRESENT	PRESENT	PRESENT	PRESENT	PRESENT	PRESENT	PRESENT
SRR1166949	Klebsiella pneumoniae	1751_ST258	USA	SRR1166949	Deleo et al.	human	infection	2005	PRESENT	PRESENT	PRESENT	PRESENT	PRESENT	PRESENT	PRESENT	PRESENT	PRESENT
SRR1166948	Klebsiella pneumoniae	1750_ST258	USA	SRR1166948	Deleo et al.	human	infection	2004	PRESENT	PRESENT	PRESENT	PRESENT	PRESENT	PRESENT	PRESENT	PRESENT	PRESENT
SRR1166947	Klebsiella pneumoniae	1749_ST258	USA	SRR1166947	Deleo et al.	human	infection	2004	PRESENT	PRESENT	PRESENT	PRESENT	PRESENT	PRESENT	PRESENT	PRESENT	PRESENT
SRR1166946	Klebsiella pneumoniae	1748_ST258	USA	SRR1166946	Deleo et al.	human	infection	2004	PRESENT	PRESENT	PRESENT	PRESENT	PRESENT	PRESENT	PRESENT	PRESENT	PRESENT
SRR1166945	Klebsiella pneumoniae	1747_ST258	USA	SRR1166945	Deleo et al.	human	infection	2003	PRESENT	PRESENT	PRESENT	PRESENT	PRESENT	PRESENT	PRESENT	PRESENT	PRESENT
SGH10_S23_	Klebsiella pneumoniae	SGH10	Singapore	SRR5082357	Lee et al.	human	infection		PRESENT	PRESENT	PRESENT	PRESENT	PRESENT	PRESENT	PRESENT	PRESENT	PRESENT
SGH07_S22_	Klebsiella pneumoniae	SGH07	Singapore	SRR5082363	Lee et al.	human	infection		PRESENT	PRESENT	PRESENT	PRESENT	PRESENT	PRESENT	PRESENT	PRESENT	PRESENT
SGH05_S21_	Klebsiella pneumoniae	SGH05	Singapore	SRR5082378	Lee et al.	human	infection		PRESENT	PRESENT	PRESENT	PRESENT	PRESENT	PRESENT	PRESENT	PRESENT	PRESENT
SGH04_S20_	Klebsiella pneumoniae	SGH04	Singapore	SRR5082359	Lee et al.	human	infection		PRESENT	PRESENT	PRESENT	PRESENT	PRESENT	PRESENT	PRESENT	PRESENT	PRESENT
SB53	Klebsiella pneumoniae	SB53	Spain	GCA_022032015.1	Bialek-Davenet et al.			1997	PRESENT	PRESENT	PRESENT	PRESENT	PRESENT	PRESENT	PRESENT	PRESENT	PRESENT
SB4447	Klebsiella pneumoniae	SB4447	France	ERR560509	Bialek-Davenet et al.			2009	PRESENT	PRESENT	PRESENT	PRESENT	PRESENT	PRESENT	PARTIAL	PRESENT	PRESENT
SB4386	Klebsiella pneumoniae	SB4386	France	ERR560507	Bialek-Davenet et al.			2008	PRESENT	PRESENT	PRESENT	PRESENT	PRESENT	PRESENT	PRESENT	PRESENT	PRESENT
SB4385	Klebsiella pneumoniae	SB4385	France	ERR560506	Bialek-Davenet et al.			2008	PRESENT	PRESENT	PRESENT	PRESENT	PRESENT	CONTIG	PARTIAL	PRESENT	ABSENT
SB3309	Klebsiella pneumoniae	SB3309	France	ERR562350	Bialek-Davenet et al.			1985	PRESENT	PRESENT	PRESENT	PRESENT	PRESENT	PRESENT	PRESENT	PRESENT	PRESENT
SB2803	Klebsiella pneumoniae	SB2803	Netherlands	ERR562348	Bialek-Davenet et al.			1999	PRESENT	PRESENT	PRESENT	PRESENT	PRESENT	PRESENT	PRESENT	PRESENT	PRESENT
NUH36_S19_	Klebsiella pneumoniae	NUH36	Singapore	SRR5082366	Lee et al.	human	infection		PRESENT	PRESENT	PRESENT	PRESENT	PRESENT	PRESENT	PRESENT	PRESENT	PRESENT
NUH29_S18_	Klebsiella pneumoniae	NUH29	Singapore	SRR5082370	Lee et al.	human	infection		PRESENT	PRESENT	PRESENT	PRESENT	PRESENT	PRESENT	PRESENT	PRESENT	PRESENT
NUH28_S17_	Klebsiella pneumoniae	NUH28	Singapore	SRR5082365	Lee et al.	human	infection		PRESENT	PRESENT	PRESENT	PRESENT	PRESENT	PRESENT	PRESENT	PRESENT	PRESENT
NUH27_S16_	Klebsiella pneumoniae	NUH27	Singapore	SRR5082377	Lee et al.	human	infection		PRESENT	PRESENT	PRESENT	PRESENT	PRESENT	PRESENT	PRESENT	PRESENT	PRESENT
NUH26_S15_	Klebsiella pneumoniae	NUH26	Singapore	SRR5082376	Lee et al.	human	infection		PRESENT	PRESENT	PRESENT	PRESENT	PRESENT	PRESENT	PRESENT	PRESENT	PRESENT
NUH24_S14_	Klebsiella pneumoniae	NUH24	Singapore	SRR5082371	Lee et al.	human	infection		PRESENT	PRESENT	PRESENT	PRESENT	PRESENT	PRESENT	PRESENT	PRESENT	PRESENT
NUH23_S13_	Klebsiella pneumoniae	NUH23	Singapore	SRR5082362	Lee et al.	human	infection		PRESENT	PRESENT	PRESENT	PRESENT	PRESENT	PRESENT	PRESENT	PRESENT	PRESENT
NUH19_S12_	Klebsiella pneumoniae	NUH19	Singapore	SRR5082369	Lee et al.	human	infection		PRESENT	PRESENT	PRESENT	PRESENT	PRESENT	PRESENT	PRESENT	PRESENT	PRESENT
NUH17_S11_	Klebsiella pneumoniae	NUH17	Singapore	SRR5082367	Lee et al.	human	infection		PRESENT	PRESENT	PRESENT	PRESENT	PRESENT	PRESENT	PRESENT	PRESENT	PRESENT
NUH16_S10_	Klebsiella pneumoniae	NUH16	Singapore	SRR5082364	Lee et al.	human	infection		PRESENT	PRESENT	PRESENT	PRESENT	PRESENT	PRESENT	PRESENT	PRESENT	PRESENT
NUH15_S9_	Klebsiella pneumoniae	NUH15	Singapore	SRR5082361	Lee et al.	human	infection		PRESENT	PRESENT	PRESENT	PRESENT	PRESENT	PRESENT	PRESENT	PRESENT	PRESENT
NUH14_S8_	Klebsiella pneumoniae	NUH14	Singapore	SRR5083110	Lee et al.	human	infection		PRESENT	PRESENT	PRESENT	PRESENT	PRESENT	PRESENT	PRESENT	PRESENT	PRESENT
NUH11_S7_	Klebsiella pneumoniae	NUH11	Singapore	SRR5082372	Lee et al.	human	infection		PRESENT	PRESENT	PRESENT	PRESENT	PRESENT	PRESENT	PRESENT	PRESENT	PRESENT
NUH09_S6_	Klebsiella pneumoniae	NUH09	Singapore	SRR5082360	Lee et al.	human	infection		PRESENT	PRESENT	PRESENT	PRESENT	PRESENT	PRESENT	PRESENT	PRESENT	PRESENT
NUH08_S5_	Klebsiella pneumoniae	NUH08	Singapore	SRR5082374	Lee et al.	human	infection		PRESENT	PRESENT	PRESENT	PRESENT	PRESENT	PRESENT	PRESENT	PRESENT	PRESENT
NUH04_S4_	Klebsiella pneumoniae	NUH04	Singapore	SRR5082379	Lee et al.	human	infection		PRESENT	PRESENT	PRESENT	PRESENT	PRESENT	PRESENT	PRESENT	PRESENT	PRESENT
NUH03_S3_	Klebsiella pneumoniae	NUH03	Singapore	SRR5082368	Lee et al.	human	infection		PRESENT	PRESENT	PRESENT	PRESENT	PRESENT	PRESENT	PRESENT	PRESENT	PRESENT
NUH02_S2_	Klebsiella pneumoniae	NUH02	Singapore	SRR5082380	Lee et al.	human	infection		PRESENT	PRESENT	PRESENT	PRESENT	PRESENT	PRESENT	PRESENT	PRESENT	PRESENT
NUH01_S1_	Klebsiella pneumoniae	NUH01	Singapore	SRR5082373	Lee et al.	human	infection		PRESENT	PRESENT	PRESENT	PRESENT	PRESENT	PRESENT	PRESENT	PRESENT	PRESENT
NCTC9662	Klebsiella pneumoniae	NCTC9662	USA	ERR1070154		human	sputum	1955	PRESENT	PRESENT	PRESENT	PRESENT	PRESENT	PRESENT	STOPS	PRESENT	PRESENT
NCTC9661	Klebsiella pneumoniae	NCTC9661	USA	ERR1070153		human	sputum	1955	PRESENT	PRESENT	PRESENT	PRESENT	PRESENT	PRESENT	STOPS	PRESENT	PRESENT
NCTC9660	Klebsiella pneumoniae	NCTC9660	USA	ERR972340				1955	PRESENT	PRESENT	PRESENT	PRESENT	PRESENT	PRESENT	PRESENT	PRESENT	PRESENT
NCTC9657	Klebsiella pneumoniae	NCTC9657		ERR1046593			respiratory tract	1955	PRESENT	PRESENT	PRESENT	PRESENT	PRESENT	PRESENT	PRESENT	PRESENT	PRESENT
NCTC9656	Klebsiella pneumoniae	NCTC9656	USA	ERR968280		bovine	mastitis	1955	PRESENT	PRESENT	PRESENT	PRESENT	PRESENT	PRESENT	PRESENT	PRESENT	PRESENT
NCTC9645	Klebsiella pneumoniae	NCTC9645	USA	GCA_900451835.1				1955	PRESENT	PRESENT	PRESENT	PRESENT	PRESENT	PRESENT	PRESENT	PRESENT	PRESENT
NCTC9637	Klebsiella pneumoniae	NCTC9637	USA	ERR956953				1955	PRESENT	PRESENT	PRESENT	PRESENT	PRESENT	PRESENT	PRESENT	PRESENT	PRESENT
NCTC9635	Klebsiella pneumoniae	NCTC9635	USA	ERR950059				1955	PRESENT	PRESENT	PRESENT	PRESENT	PRESENT	PRESENT	PRESENT	PRESENT	PRESENT
NCTC9632	Klebsiella pneumoniae	NCTC9632	USA	ERR956950				1955	PRESENT	PRESENT	PRESENT	PRESENT	PRESENT	PRESENT	PRESENT	PRESENT	PRESENT
NCTC9601	Klebsiella pneumoniae	NCTC9601	UK	GCA_900451695.1			nose	1954	PRESENT	PRESENT	PRESENT	PRESENT	PRESENT	PRESENT	PRESENT	PRESENT	PRESENT
NCTC9504	Klebsiella pneumoniae	NCTC9504	USA	ERR690969		human	post-operative infection	1954	PRESENT	PRESENT	PRESENT	PRESENT	PRESENT	PRESENT	PRESENT	PRESENT	PRESENT
NCTC9494	Klebsiella pneumoniae	NCTC9494	USA	ERR690976		human	sputum	1954	PRESENT	PRESENT	PRESENT	PRESENT	PRESENT	PRESENT	PRESENT	PRESENT	PRESENT
NCTC9177	Klebsiella variicola	NCTC9177	Denmark	ERR690974		human	sputum	1952	PRESENT	PRESENT	PRESENT	PRESENT	PRESENT	PRESENT	PRESENT	PRESENT	PRESENT
NCTC9143	Klebsiella pneumoniae	NCTC9143	Denmark	ERR987673		human	urine	1952	PRESENT	PRESENT	PRESENT	PRESENT	PRESENT	PRESENT	PRESENT	PRESENT	PRESENT
NCTC9140	Klebsiella pneumoniae	NCTC9140	Denmark	ERR690973		human	urine	1952	PRESENT	PRESENT	PRESENT	PRESENT	PRESENT	PRESENT	PRESENT	PRESENT	PRESENT
NCTC9139	Klebsiella pneumoniae	NCTC9139	Denmark	ERR926626		human	heart valve	1952	PRESENT	PRESENT	PRESENT	PRESENT	PRESENT	PRESENT	PRESENT	PRESENT	PRESENT
NCTC9138	Klebsiella pneumoniae	NCTC9138	Denmark	ERR1025274		human	bronchial washings	1952	PRESENT	PRESENT	PRESENT	PRESENT	PRESENT	PRESENT	PRESENT	PRESENT	PRESENT
NCTC9137	Klebsiella pneumoniae	NCTC9137	Denmark	ERR1025273		human	urine	1952	PRESENT	PRESENT	PRESENT	PRESENT	PRESENT	PRESENT	PRESENT	PRESENT	PRESENT
NCTC9136	Klebsiella pneumoniae	NCTC9136	Denmark	ERR1046604		human	surgical incision drainage	1952	PRESENT	PRESENT	PRESENT	PRESENT	PRESENT	PRESENT	PRESENT	PRESENT	PRESENT
NCTC9135	Klebsiella pneumoniae	NCTC9135	Denmark	ERR1046603		human	diarrhoea	1951	PRESENT	STOPS	PRESENT	PRESENT	PRESENT	PRESENT	PRESENT	PRESENT	PRESENT
NCTC9134	Klebsiella pneumoniae	NCTC9134	Denmark	ERR987672		human	urine	1952	PRESENT	PRESENT	PRESENT	PRESENT	PRESENT	PRESENT	PRESENT	PRESENT	PRESENT
NCTC9133	Klebsiella pneumoniae	NCTC9133	Denmark	ERR956948		human	urine	1952	PRESENT	PRESENT	PRESENT	PRESENT	PRESENT	PRESENT	PRESENT	PRESENT	PRESENT
NCTC9132	Klebsiella pneumoniae	NCTC9132	Denmark	ERR956947		human	urine	1952	PRESENT	PRESENT	PRESENT	PRESENT	PRESENT	PRESENT	PRESENT	PRESENT	PRESENT
NCTC9130	Klebsiella pneumoniae	NCTC9130	Denmark	ERR950082		human	urine	1952	PRESENT	PRESENT	PRESENT	PRESENT	PRESENT	PRESENT	PRESENT	PRESENT	PRESENT
NCTC9129	Klebsiella pneumoniae	NCTC9129	Denmark	ERR1016528		human	urine	1952	PRESENT	PRESENT	PRESENT	PRESENT	PRESENT	PRESENT	PRESENT	PRESENT	PRESENT
NCTC9128	Klebsiella pneumoniae	NCTC9128		GCA_900451565.1		human	urine		PRESENT	PRESENT	PRESENT	PRESENT	PRESENT	PRESENT	PRESENT	PRESENT	PRESENT
NCTC9127	Klebsiella pneumoniae	NCTC9127	USA	ERR950081		food	ice cream	1933	PRESENT	PRESENT	PRESENT	PRESENT	PRESENT	PRESENT	PRESENT	PRESENT	PRESENT
NCTC8895	Klebsiella pneumoniae	NCTC8895		ERR950080		human	sputum	1952	PRESENT	PRESENT	PRESENT	PRESENT	PRESENT	PRESENT	PRESENT	PRESENT	PRESENT
NCTC8883	Klebsiella pneumoniae	NCTC8883		ERR950079		human	sputum	1952	PRESENT	PRESENT	PRESENT	PRESENT	PRESENT	PRESENT	PRESENT	PRESENT	PRESENT
NCTC8849	Klebsiella pneumoniae	NCTC8849	UK	ERR950078		human	respiratory	1951	PRESENT	PRESENT	PRESENT	PRESENT	PRESENT	PRESENT	PRESENT	PRESENT	PRESENT
NCTC8839	Klebsiella pneumoniae	NCTC8839		ERR950062		human	sputum	1951	PRESENT	PRESENT	PRESENT	PRESENT	PRESENT	PRESENT	PRESENT	PRESENT	PRESENT
NCTC8172	Klebsiella pneumoniae	NCTC8172	UK	ERR910549		food	butter	1950	PRESENT	PRESENT	PRESENT	PRESENT	PRESENT	PRESENT	PRESENT	PRESENT	PRESENT
NCTC7799	Klebsiella pneumoniae	NCTC7799	UK	ERS744780		human	nose	1948	PRESENT	PRESENT	PRESENT	PRESENT	PRESENT	PRESENT	STOPS	PRESENT	PRESENT
NCTC7427	Klebsiella pneumoniae	NCTC7427		ERR999928				1948	PRESENT	PRESENT	PRESENT	PRESENT	PRESENT	PRESENT	PRESENT	PRESENT	PRESENT
NCTC5057	Klebsiella pneumoniae	NCTC5057		ERR1046595					PRESENT	PRESENT	PRESENT	PRESENT	PRESENT	PRESENT	PRESENT	PRESENT	PRESENT
NCTC5056	Klebsiella pneumoniae	NCTC5056		ERR985351		human	pneumonia		PRESENT	PRESENT	PRESENT	PRESENT	PRESENT	PRESENT	PRESENT	PRESENT	PRESENT
NCTC5054	Klebsiella pneumoniae	NCTC5054		ERR985350		human	pnuemonia	1937	PRESENT	PRESENT	PRESENT	PRESENT	PRESENT	PRESENT	PRESENT	PRESENT	PRESENT
NCTC5053	Klebsiella pneumoniae	NCTC5053		ERR1144973				1934	PRESENT	PRESENT	PRESENT	PRESENT	PRESENT	PRESENT	STOPS	PRESENT	PRESENT
NCTC5052	Klebsiella pneumoniae	NCTC5052	Netherlands	ERR985349				1934	PRESENT	PRESENT	PRESENT	PRESENT	PRESENT	PRESENT	PRESENT	PRESENT	PRESENT
NCTC5051	Klebsiella pneumoniae	unknown		GCF_900451855.1					PRESENT	PRESENT	PRESENT	PRESENT	PRESENT	PRESENT	STOPS	PRESENT	PRESENT
NCTC5050	Klebsiella pneumoniae	NCTC5050	Indonesia	ERR676887		human	nose	1931	PRESENT	PRESENT	PRESENT	PRESENT	PRESENT	PRESENT	PRESENT	PRESENT	PRESENT
NCTC5047	Klebsiella pneumoniae	NCTC5047	Netherlands	ERS736956		human	nose	1937	PRESENT	PRESENT	PRESENT	PRESENT	PRESENT	PRESENT	PRESENT	PRESENT	PRESENT
NCTC5046	Klebsiella pneumoniae	NCTC5046	Indonesia	ERS513127		human	nose	1934	PRESENT	PRESENT	PRESENT	PRESENT	PRESENT	PRESENT	PRESENT	PRESENT	PRESENT
NCTC204	Klebsiella pneumoniae	NCTC204	UK	ERR1140973				1920	PRESENT	PRESENT	PRESENT	PRESENT	PRESENT	PRESENT	STOPS	PRESENT	PRESENT
NCTC1936	Klebsiella pneumoniae	NCTC1936	Netherlands	ERS736957		human	nose	1925	PRESENT	PRESENT	PRESENT	PRESENT	PRESENT	PRESENT	PRESENT	PRESENT	PRESENT
NCTC13635	Klebsiella pneumoniae	NCTC13635		ERR731670		cow's milk	cow's milk		PRESENT	PRESENT	PRESENT	PRESENT	PRESENT	PRESENT	PRESENT	PRESENT	PRESENT
NCTC13465	Klebsiella pneumoniae	NCTC13465		GCA_900461465.1					PRESENT	PRESENT	PRESENT	PRESENT	PRESENT	PRESENT	PRESENT	PRESENT	PRESENT
NCTC13443	Klebsiella pneumoniae	NCTC13443	UK	ERR731657				2009	PRESENT	PRESENT	PRESENT	PRESENT	PRESENT	PRESENT	PRESENT	PRESENT	PRESENT
NCTC13442	Klebsiella pneumoniae	NCTC13442		ERR718784					PRESENT	PRESENT	PRESENT	PRESENT	PRESENT	PRESENT	PRESENT	PRESENT	PRESENT
NCTC13440	Klebsiella pneumoniae	NCTC13440		ERR718782					PRESENT	PRESENT	PRESENT	PRESENT	PRESENT	PRESENT	PRESENT	PRESENT	PRESENT
NCTC13439	Klebsiella pneumoniae	NCTC13439	Italy	ERR718781				2006	PRESENT	PRESENT	PRESENT	PRESENT	PRESENT	PRESENT	PRESENT	PRESENT	PRESENT
NCTC13438	Klebsiella pneumoniae	NCTC13438	UK	ERR718780				2007	PRESENT	PRESENT	PRESENT	PRESENT	PRESENT	PRESENT	PRESENT	PRESENT	PRESENT
NCTC13368	Klebsiella quasipneumoniae subsp. similipneumoniae	NCTC13368	USA	ERR987684				1994	PRESENT	PRESENT	PRESENT	PRESENT	PRESENT	PRESENT	PRESENT	PRESENT	PRESENT
NCTC12463	Klebsiella pneumoniae	NCTC12463		GCA_900451415.1					PRESENT	PRESENT	PRESENT	PRESENT	PRESENT	PRESENT	PRESENT	PRESENT	PRESENT
NCTC11698	Klebsiella pneumoniae	NCTC11698		ERR980612					PRESENT	PRESENT	PRESENT	PRESENT	PRESENT	PRESENT	PRESENT	PRESENT	PRESENT
NCTC11697	Klebsiella pneumoniae	NCTC11697		ERR902059				1984	PRESENT	PRESENT	PRESENT	PRESENT	PRESENT	PRESENT	PRESENT	PRESENT	PRESENT
NCTC11695	Klebsiella variicola	NCTC11695		ERR718767					PRESENT	PRESENT	PRESENT	PRESENT	PRESENT	PRESENT	PRESENT	PRESENT	PRESENT
NCTC11693	Klebsiella pneumoniae	NCTC11693		ERR902058					PRESENT	PRESENT	PRESENT	PRESENT	PRESENT	PRESENT	PRESENT	PRESENT	PRESENT
NCTC11692	Klebsiella pneumoniae	NCTC11692		ERR902057					PRESENT	PRESENT	PRESENT	PRESENT	PRESENT	PRESENT	PRESENT	ABSENT	PRESENT
NCTC11689	Klebsiella pneumoniae	NCTC11689		ERR910529					PRESENT	PRESENT	PRESENT	PRESENT	PRESENT	PRESENT	PRESENT	PRESENT	PRESENT
NCTC11688	Klebsiella pneumoniae	NCTC11688		ERR902055					PRESENT	PRESENT	PRESENT	PRESENT	PRESENT	PRESENT	PRESENT	PRESENT	PRESENT
NCTC11687	Klebsiella pneumoniae	NCTC11687		ERR902054					PRESENT	PRESENT	PRESENT	PRESENT	PRESENT	PRESENT	PRESENT	PRESENT	PRESENT
NCTC11686	Klebsiella pneumoniae	NCTC11686		ERR910527					PRESENT	PRESENT	PRESENT	PRESENT	PRESENT	PRESENT	PRESENT	PRESENT	PRESENT
NCTC11684	Klebsiella pneumoniae	NCTC11684		ERR910526					PRESENT	PRESENT	PRESENT	PRESENT	PRESENT	PRESENT	PRESENT	PRESENT	PRESENT
NCTC11682	Klebsiella pneumoniae	NCTC11682		ERR906334					PRESENT	PRESENT	PRESENT	PRESENT	PRESENT	PRESENT	PRESENT	PRESENT	PRESENT
NCTC11680	Klebsiella pneumoniae	NCTC11680		ERR902053					PRESENT	PRESENT	PRESENT	PRESENT	PRESENT	PRESENT	PRESENT	PRESENT	PRESENT
NCTC11679	Klebsiella pneumoniae	NCTC11679		ERR906333					PRESENT	PRESENT	PRESENT	PRESENT	PRESENT	PRESENT	PRESENT	PRESENT	PRESENT
NCTC11678	Klebsiella pneumoniae	NCTC11678		ERR902052					PRESENT	PRESENT	PRESENT	PRESENT	PRESENT	PRESENT	PRESENT	PRESENT	PRESENT
NCTC11676	Klebsiella pneumoniae	NCTC11676		ERR902051				1979	PRESENT	PRESENT	PRESENT	PRESENT	PRESENT	PRESENT	PRESENT	PRESENT	PRESENT
NCTC11675	Klebsiella pneumoniae	NCTC11675		ERR968272					PRESENT	PRESENT	PRESENT	PRESENT	PRESENT	PRESENT	PRESENT	PRESENT	PRESENT
NCTC11674	Klebsiella pneumoniae	NCTC11674		ERR902050					PRESENT	PRESENT	PRESENT	PRESENT	PRESENT	PRESENT	PRESENT	PRESENT	PRESENT
NCTC11359	Klebsiella pneumoniae	NCTC11359		ERR902049				1954	PRESENT	PRESENT	PRESENT	PRESENT	PRESENT	PRESENT	PRESENT	PRESENT	PRESENT
NCTC11358	Klebsiella pneumoniae	NCTC11358		ERR902048					PRESENT	PRESENT	PRESENT	PRESENT	PRESENT	PRESENT	PRESENT	PRESENT	PRESENT
NCTC11357	Klebsiella quasipneumoniae subsp. similipneumoniae	NCTC11357		ERR886527					PRESENT	PRESENT	PRESENT	PRESENT	PRESENT	PRESENT	PRESENT	PRESENT	PRESENT
NCTC11228	Klebsiella pneumoniae	NCTC11228		ERR980634					PRESENT	PRESENT	PRESENT	PRESENT	PRESENT	PRESENT	PRESENT	PRESENT	PRESENT
NCTC10314	Klebsiella pneumoniae	NCTC10314	UK	ERR695652				1960	PRESENT	PRESENT	PRESENT	PRESENT	PRESENT	PRESENT	PRESENT	PRESENT	PRESENT
NCTC10313	Klebsiella pneumoniae	NCTC10313		ERR695651					PRESENT	PRESENT	PRESENT	PRESENT	PRESENT	PRESENT	PRESENT	PRESENT	PRESENT
NCTC10262	Klebsiella variicola	NCTC10262		ERR956954					PRESENT	PRESENT	PRESENT	PRESENT	PRESENT	PRESENT	PRESENT	PRESENT	PRESENT
NCTC10246	Klebsiella pneumoniae	NCTC10246	USA	ERR1070156				1948	PRESENT	PRESENT	PRESENT	PRESENT	PRESENT	PRESENT	PRESENT	PRESENT	PRESENT
NCTC10213	Klebsiella pneumoniae	NCTC10213	USA	ERR879388		human	throat	1960	PRESENT	PRESENT	PRESENT	PRESENT	PRESENT	PRESENT	PRESENT	PRESENT	PRESENT
NCTC10004	Klebsiella pneumoniae	NCTC10004	USA	ERR879386		human	urine	1958	PRESENT	PRESENT	PRESENT	PRESENT	PRESENT	PRESENT	PRESENT	PRESENT	PRESENT
KP34	Klebsiella pneumoniae	unknown		SRR5082402	Novel				PRESENT	PRESENT	PRESENT	PRESENT	PRESENT	PRESENT	PRESENT	PRESENT	PRESENT
KP33	Klebsiella pneumoniae	unknown		SRR5082387	Novel				PRESENT	PRESENT	PRESENT	PRESENT	PRESENT	PRESENT	PRESENT	PRESENT	PRESENT
KP32	Klebsiella pneumoniae	unknown		SRR5082385	Novel				PRESENT	PRESENT	PRESENT	PRESENT	PRESENT	PRESENT	PRESENT	PRESENT	PRESENT
KP31	Klebsiella pneumoniae	unknown		SRR5082399	Novel				PRESENT	PRESENT	PRESENT	PRESENT	PRESENT	PRESENT	PRESENT	PRESENT	PRESENT
KP30	Klebsiella pneumoniae	unknown		SRR5082398	Novel				PRESENT	PRESENT	PRESENT	PRESENT	PRESENT	PRESENT	PRESENT	PRESENT	PRESENT
KP29	Klebsiella pneumoniae	unknown		SRR5082397	Novel				PRESENT	PRESENT	PRESENT	PRESENT	PRESENT	PRESENT	PRESENT	PRESENT	PRESENT
KP28	Klebsiella pneumoniae	unknown		SRR5082394	Novel				PRESENT	PRESENT	PRESENT	PRESENT	PRESENT	PRESENT	PRESENT	PRESENT	PRESENT
KP27	Klebsiella pneumoniae	unknown		SRR5082392	Novel				PRESENT	PRESENT	PRESENT	PRESENT	PRESENT	PRESENT	PRESENT	PRESENT	PRESENT
KP26	Klebsiella pneumoniae	unknown		SRR5082389	Novel				PRESENT	PRESENT	PRESENT	PRESENT	PRESENT	PRESENT	PRESENT	PRESENT	PRESENT
KP25	Klebsiella pneumoniae	unknown		SRR5082384	Novel	human			PRESENT	PRESENT	PRESENT	PRESENT	PRESENT	PRESENT	PRESENT	PRESENT	PRESENT
KP23	Klebsiella pneumoniae	unknown		SRR5082401	Novel				PRESENT	PRESENT	PRESENT	PRESENT	PRESENT	PRESENT	PRESENT	PRESENT	PRESENT
KP22	Klebsiella pneumoniae	unknown		SRR5082403	Novel				PRESENT	PRESENT	PRESENT	PRESENT	PRESENT	PRESENT	PRESENT	PRESENT	PRESENT
KP21	Klebsiella pneumoniae	unknown		SRR5082382	Novel				PRESENT	PRESENT	PRESENT	PRESENT	PRESENT	PRESENT	PRESENT	PRESENT	PRESENT
KP2	Klebsiella pneumoniae								PRESENT	PRESENT	PRESENT	PRESENT	PRESENT	PRESENT	PRESENT	PRESENT	PRESENT
KP19	Klebsiella pneumoniae	unknown		SRR5082391	Novel				PRESENT	PRESENT	PRESENT	PRESENT	PRESENT	PRESENT	PRESENT	PRESENT	PRESENT
KP18	Klebsiella pneumoniae	unknown		SRR5082396	Novel				PRESENT	PRESENT	PRESENT	PRESENT	PRESENT	PRESENT	PRESENT	PRESENT	PRESENT
KP17	Klebsiella pneumoniae	unknown		SRR5082395	Novel				PRESENT	PRESENT	PRESENT	PRESENT	PRESENT	PRESENT	PRESENT	PRESENT	PRESENT
KP16	Klebsiella pneumoniae	unknown		SRR5082383	Novel				PRESENT	PRESENT	PRESENT	PRESENT	PRESENT	PRESENT	PRESENT	PRESENT	PRESENT
KP15	Klebsiella pneumoniae	unknown		SRR5082400	Novel				PRESENT	PRESENT	PRESENT	PRESENT	PRESENT	PRESENT	PRESENT	PRESENT	PRESENT
KP14	Klebsiella pneumoniae	unknown		SRR5082390	Novel				PRESENT	PRESENT	PRESENT	PRESENT	PRESENT	PRESENT	PRESENT	PRESENT	PRESENT
KP13	Klebsiella pneumoniae	unknown		SRR5082393	Novel				PRESENT	PRESENT	PRESENT	PRESENT	PRESENT	PRESENT	PRESENT	PRESENT	PRESENT
Klebsiella_variicola_At-22	Klebsiella variicola	K. variicola At-22	South America	NC_013850	Holt et al 2015	Atta cephalotes fungus garden		2003-2006	PRESENT	PRESENT	PRESENT	PRESENT	PRESENT	PRESENT	PRESENT	PRESENT	PRESENT
Klebsiella_sp_MS_92-3	Klebsiella pneumoniae	MS_92-3	USA	AFBO01	Holt et al 2015	Human			PRESENT	PRESENT	PRESENT	PRESENT	PRESENT	PRESENT	PRESENT	PRESENT	PRESENT
Klebsiella_sp_4_1_44FAA	Klebsiella pneumoniae	4 1 44FAA	USA?	ACWO01	Holt et al 2015	Human			PRESENT	PRESENT	PRESENT	PRESENT	PRESENT	PRESENT	PRESENT	PRESENT	PRESENT
Klebsiella_sp_1_1_55	Klebsiella variicola	1 1 55	USA?	ACXA01	Holt et al 2015	Human			PRESENT	PRESENT	PRESENT	PRESENT	PRESENT	PRESENT	PRESENT	PRESENT	PRESENT
Klebsiella_pneumoniae_WGLW3	Klebsiella pneumoniae	WGLW3	USA?	AMLN01	Holt et al 2015	Human			PRESENT	PRESENT	PRESENT	PRESENT	PRESENT	PRESENT	PRESENT	PRESENT	PRESENT
Klebsiella_pneumoniae_WGLW1	Klebsiella pneumoniae	WGLW1	USA	AMLL01	Holt et al 2015	Human			PRESENT	PRESENT	PRESENT	PRESENT	PRESENT	PRESENT	PRESENT	PRESENT	PRESENT
Klebsiella_pneumoniae_NTUH-K2044	Klebsiella pneumoniae	NTUH-K2044	Taiwan	NC_012731	Holt et al 2015	Human			PRESENT	PRESENT	PRESENT	PRESENT	PRESENT	PRESENT	PRESENT	PRESENT	PRESENT
Klebsiella_pneumoniae_MGH_78578	Klebsiella pneumoniae	MGH 78578	USA?	NC_009648	Holt et al 2015	Human		1994	PRESENT	PRESENT	PRESENT	PRESENT	PRESENT	PRESENT	PRESENT	PRESENT	PRESENT
Klebsiella_pneumoniae_LZ	Klebsiella pneumoniae	LZ	China	AJVY01	Holt et al 2015	Environmental		2010	PRESENT	PRESENT	PRESENT	PRESENT	PRESENT	PRESENT	PRESENT	PRESENT	PRESENT
Klebsiella_pneumoniae_LCT-KP214	Klebsiella pneumoniae	LCT-KP214	China	AJHE01	Holt et al 2015	Human			PRESENT	PRESENT	PRESENT	PRESENT	PRESENT	PRESENT	PRESENT	PRESENT	PRESENT
Klebsiella_pneumoniae_KPNIH9	Klebsiella pneumoniae	KPNIH9	USA	AKAB01	Holt et al 2015	Human		2011	PRESENT	PRESENT	PRESENT	PRESENT	PRESENT	PRESENT	PRESENT	PRESENT	PRESENT
Klebsiella_pneumoniae_KPNIH8	Klebsiella pneumoniae	KPNIH8	USA	AKAA01	Holt et al 2015	Human		2011	PRESENT	PRESENT	PRESENT	PRESENT	PRESENT	PRESENT	PRESENT	PRESENT	PRESENT
Klebsiella_pneumoniae_KPNIH7	Klebsiella pneumoniae	KPNIH7	USA	AJZZ01	Holt et al 2015	Environmental		2011	PRESENT	PRESENT	PRESENT	PRESENT	PRESENT	PRESENT	PRESENT	PRESENT	PRESENT
Klebsiella_pneumoniae_KPNIH6	Klebsiella pneumoniae	KPNIH6	USA	AJZY01	Holt et al 2015	Human		2011	PRESENT	PRESENT	PRESENT	PRESENT	PRESENT	PRESENT	PRESENT	PRESENT	PRESENT
Klebsiella_pneumoniae_KPNIH5	Klebsiella pneumoniae	KPNIH5	USA	AJZX01	Holt et al 2015	Human		2011	PRESENT	PRESENT	PRESENT	PRESENT	PRESENT	PRESENT	PRESENT	PRESENT	PRESENT
Klebsiella_pneumoniae_KPNIH4	Klebsiella pneumoniae	KPNIH4	USA	AJZW01	Holt et al 2015	Human		2011	PRESENT	PRESENT	PRESENT	PRESENT	PRESENT	PRESENT	PRESENT	PRESENT	PRESENT
Klebsiella_pneumoniae_KPNIH23	Klebsiella pneumoniae	KPNIH23	USA	AKAN01	Holt et al 2015	Human		2011	PRESENT	PRESENT	PRESENT	PRESENT	PRESENT	PRESENT	PRESENT	PRESENT	PRESENT
Klebsiella_pneumoniae_KPNIH22	Klebsiella pneumoniae	KPNIH22	USA	AKAM01	Holt et al 2015	Human		2011	PRESENT	PRESENT	PRESENT	PRESENT	PRESENT	PRESENT	PRESENT	PRESENT	PRESENT
Klebsiella_pneumoniae_KPNIH21	Klebsiella pneumoniae	KPNIH21	USA	AKAL01	Holt et al 2015	Human		2011	PRESENT	PRESENT	PRESENT	PRESENT	PRESENT	PRESENT	PRESENT	PRESENT	PRESENT
Klebsiella_pneumoniae_KPNIH20	Klebsiella pneumoniae	KPNIH20	USA	AKAK01	Holt et al 2015	Human		2011	PRESENT	PRESENT	PRESENT	PRESENT	PRESENT	PRESENT	PRESENT	PRESENT	PRESENT
Klebsiella_pneumoniae_KPNIH2	Klebsiella pneumoniae	KPNIH2	USA	AJZV01	Holt et al 2015	Human		2011	PRESENT	PRESENT	PRESENT	PRESENT	PRESENT	PRESENT	PRESENT	PRESENT	PRESENT
Klebsiella_pneumoniae_KPNIH19	Klebsiella pneumoniae	KPNIH19	USA	AKAJ01	Holt et al 2015	Human		2011	STOPS	PRESENT	PRESENT	PRESENT	PRESENT	PRESENT	PRESENT	PRESENT	PRESENT
Klebsiella_pneumoniae_KPNIH18	Klebsiella pneumoniae	KPNIH18	USA	AKAI01	Holt et al 2015	Human		2011	PRESENT	PRESENT	PRESENT	PRESENT	PRESENT	PRESENT	PRESENT	PRESENT	PRESENT
Klebsiella_pneumoniae_KPNIH17	Klebsiella pneumoniae	KPNIH17	USA	AKAH01	Holt et al 2015	Human		2011	PRESENT	PRESENT	PRESENT	PRESENT	PRESENT	PRESENT	PRESENT	PRESENT	PRESENT
Klebsiella_pneumoniae_KPNIH16	Klebsiella pneumoniae	KPNIH16	USA	AKAG01	Holt et al 2015	Human		2011	PRESENT	PRESENT	PRESENT	PRESENT	PRESENT	PRESENT	PRESENT	PRESENT	PRESENT
Klebsiella_pneumoniae_KPNIH14	Klebsiella pneumoniae	KPNIH14	USA	AKAF01	Holt et al 2015	Human		2011	PRESENT	PRESENT	PRESENT	PRESENT	PRESENT	PRESENT	PRESENT	PRESENT	PRESENT
Klebsiella_pneumoniae_KPNIH12	Klebsiella pneumoniae	KPNIH12	USA	AKAE01	Holt et al 2015	Human		2011	PRESENT	PRESENT	PRESENT	PRESENT	PRESENT	PRESENT	PRESENT	PRESENT	PRESENT
Klebsiella_pneumoniae_KPNIH11	Klebsiella pneumoniae	KPNIH11	USA	AKAD01	Holt et al 2015	Human		2011	PRESENT	PRESENT	PRESENT	PRESENT	PRESENT	PRESENT	PRESENT	PRESENT	PRESENT
Klebsiella_pneumoniae_KPNIH10	Klebsiella pneumoniae	KPNIH10	USA	AKAC01	Holt et al 2015	Human		2011	PRESENT	PRESENT	PRESENT	PRESENT	PRESENT	PRESENT	PRESENT	PRESENT	PRESENT
Klebsiella_pneumoniae_KPNIH1	Klebsiella pneumoniae	KPNIH1	USA	AJZU01	Holt et al 2015	Human		2011	PRESENT	PRESENT	PRESENT	PRESENT	PRESENT	PRESENT	PRESENT	PRESENT	PRESENT
Klebsiella_pneumoniae_KCTC_2242	Klebsiella pneumoniae	KCTC 2242	South Korea	NC_017540	Holt et al 2015	Human			PRESENT	PRESENT	PRESENT	PRESENT	PRESENT	PRESENT	PRESENT	PRESENT	PRESENT
Klebsiella_pneumoniae_JH1	Klebsiella pneumoniae	JH1	USA?	AFQK01	Holt et al 2015	Human			PRESENT	PRESENT	PRESENT	PRESENT	PRESENT	PRESENT	PRESENT	PRESENT	PRESENT
Klebsiella_pneumoniae_JC2877	Klebsiella pneumoniae	JC2877		AJJI01	Holt et al 2015	Human			PRESENT	PRESENT	PRESENT	PRESENT	PRESENT	PRESENT	PRESENT	PRESENT	PRESENT
Klebsiella_pneumoniae_HS11286	Klebsiella pneumoniae	HS11286	China	NC_016838	Holt et al 2015	Human		2011	PRESENT	PRESENT	PRESENT	PRESENT	PRESENT	PRESENT	PRESENT	PRESENT	PRESENT
Klebsiella_pneumoniae_342	Klebsiella variicola	342		NC_0011281	Holt et al 2015	Plant			PRESENT	PRESENT	PRESENT	PRESENT	PRESENT	PRESENT	PRESENT	PRESENT	PRESENT
Klebsiella_pneumoniae_1191100241	Klebsiella pneumoniae	1191100241	Netherlands	AFXH01	Holt et al 2015	Human		2011	PRESENT	PRESENT	PRESENT	PRESENT	PRESENT	PRESENT	PARTIAL	PRESENT	CONTIG
Klebsiella_pneumoniae_1162281	Klebsiella pneumoniae	1162281		AFQL01	Holt et al 2015	Human			PRESENT	PRESENT	PRESENT	PRESENT	PRESENT	PRESENT	PRESENT	PRESENT	PRESENT
Klebsiella_pneumoniae_1084	Klebsiella pneumoniae	1084	Taiwan	NC_018522	Holt et al 2015	Human		2002	PRESENT	PRESENT	PRESENT	PRESENT	PRESENT	PRESENT	PRESENT	PRESENT	PRESENT
Klebs_rhinoscleromatis_ATCC_13884	Klebsiella pneumoniae	subsp rhinoscleromatis ATCC 13884	Indonesia	ACZD01	Holt et al 2015	Human	infection	1973	PRESENT	PRESENT	PRESENT	PRESENT	PRESENT	PRESENT	PARTIAL	PRESENT	PRESENT
KC0278	Klebsiella pneumoniae	INF332	Australia	SRR5082464	wyres et al. 2016	human	infection	2014	PRESENT	PRESENT	PRESENT	PRESENT	PRESENT	PRESENT	PRESENT	PRESENT	PRESENT
KC0205	Klebsiella variicola	INF255	Australia	SRR5082485	wyres et al. 2016	human	infection	2013	PRESENT	PRESENT	PRESENT	PRESENT	PRESENT	PRESENT	PRESENT	PRESENT	PRESENT
ERR732775	Klebsiella pneumoniae	TG01970	USA	ERR732775	Struve et al.	human		2006	PRESENT	PRESENT	PRESENT	PRESENT	PRESENT	PRESENT	PRESENT	PRESENT	PRESENT
ERR732774	Klebsiella pneumoniae	TG04609	USA	ERR732774	Struve et al.	human	infection	2006	PRESENT	PRESENT	PRESENT	PRESENT	PRESENT	PRESENT	PRESENT	PRESENT	PRESENT
ERR732499	Klebsiella pneumoniae	TG12369	USA	ERR732499	Struve et al.	human		2000	PRESENT	PRESENT	PRESENT	PRESENT	PRESENT	PRESENT	PRESENT	PRESENT	PRESENT
ERR727156	Klebsiella pneumoniae	TG22672	USA	ERR727156	Struve et al.	human		2010	PRESENT	CONTIG	PRESENT	PRESENT	PRESENT	PRESENT	PRESENT	CONTIG	PRESENT
ERR727155	Klebsiella pneumoniae	TG30739	USA	ERR727155	Struve et al.	human	infection	2011	PRESENT	PARTIAL	PRESENT	PRESENT	PRESENT	CONTIG	CONTIG	CONTIG	ABSENT
ERR727154	Klebsiella pneumoniae	TG28459	USA	ERR727154	Struve et al.	human	infection	2011	PRESENT	CONTIG	PARTIAL	PRESENT	CONTIG	PARTIAL	PARTIAL	ABSENT	ABSENT
ERR727153	Klebsiella pneumoniae	TG22706	USA	ERR727153	Struve et al.	human		2010	PRESENT	PRESENT	PRESENT	PRESENT	PRESENT	PRESENT	CONTIG	PRESENT	CONTIG
ERR727152	Klebsiella pneumoniae	TG22675	USA	ERR727152	Struve et al.	human		2010	PRESENT	CONTIG	PRESENT	PRESENT	PRESENT	PRESENT	PRESENT	CONTIG	PRESENT
ERR727151	Klebsiella pneumoniae	TG22030	USA	ERR727151	Struve et al.	human		2011	PRESENT	CONTIG	PRESENT	PRESENT	PRESENT	PRESENT	PRESENT	CONTIG	PRESENT
ERR727150	Klebsiella pneumoniae	TG22026	USA	ERR727150	Struve et al.	human		2011	PRESENT	CONTIG	PARTIAL	PRESENT	PRESENT	AMBIGUOUS	PARTIAL	ABSENT	ABSENT
ERR727149	Klebsiella pneumoniae	TG21996	USA	ERR727149	Struve et al.	human		2011	PRESENT	CONTIG	CONTIG	PRESENT	PRESENT	CONTIG	PARTIAL	ABSENT	ABSENT
ERR727148	Klebsiella pneumoniae	TG21950	USA	ERR727148	Struve et al.	human		2010	PRESENT	CONTIG	PRESENT	PRESENT	PRESENT	PARTIAL	AMBIGUOUS	CONTIG	ABSENT
ERR726901	Klebsiella pneumoniae	TG21942	USA	ERR726901	Struve et al.	human		2010	PRESENT	PRESENT	PRESENT	PRESENT	PRESENT	PRESENT	PRESENT	PRESENT	PRESENT
ERR720265	Klebsiella pneumoniae	TG21984	USA	ERR720265	Struve et al.	human		2010	PRESENT	PRESENT	PRESENT	PRESENT	PRESENT	PRESENT	PRESENT	PRESENT	PRESENT
ERR720264	Klebsiella pneumoniae	TG21982	USA	ERR720264	Struve et al.	human	infection	2010	PRESENT	PRESENT	PRESENT	PRESENT	PRESENT	PRESENT	PRESENT	PRESENT	PRESENT
ERR720263	Klebsiella pneumoniae	TG21980	USA	ERR720263	Struve et al.	human	infection	2010	PRESENT	PRESENT	PRESENT	PRESENT	PRESENT	PRESENT	PRESENT	PRESENT	PRESENT
ERR720262	Klebsiella pneumoniae	TG21976	USA	ERR720262	Struve et al.	human	infection	2011	PRESENT	PRESENT	PRESENT	PRESENT	PRESENT	PRESENT	PRESENT	PRESENT	PRESENT
ERR720261	Klebsiella pneumoniae	TG21974	USA	ERR720261	Struve et al.	human	infection	2011	PRESENT	PRESENT	PRESENT	PRESENT	PRESENT	PRESENT	PRESENT	PRESENT	PRESENT
ERR720259	Klebsiella pneumoniae	TG21587	USA	ERR720259	Struve et al.				PRESENT	PRESENT	PRESENT	PRESENT	PRESENT	PRESENT	PRESENT	PRESENT	PRESENT
ERR720257	Klebsiella pneumoniae	TG21569	USA	ERR720257	Struve et al.			1990-1991	PRESENT	PRESENT	PRESENT	PRESENT	PRESENT	PRESENT	PRESENT	PRESENT	PRESENT
ERR720256	Klebsiella pneumoniae	TG21545	USA	ERR720256	Struve et al.			2008	PRESENT	PRESENT	PRESENT	PRESENT	PRESENT	PRESENT	PRESENT	PRESENT	PRESENT
ERR720255	Klebsiella pneumoniae	TG21539	USA	ERR720255	Struve et al.				PRESENT	PRESENT	PRESENT	PRESENT	PRESENT	PRESENT	PRESENT	PRESENT	PRESENT
ERR720254	Klebsiella pneumoniae	TG12387	USA	ERR720254	Struve et al.	human	infection	2007	PRESENT	PRESENT	PRESENT	PRESENT	PRESENT	PRESENT	PRESENT	PRESENT	PRESENT
ERR720253	Klebsiella pneumoniae	TG12378	USA	ERR720253	Struve et al.	human		2000	PRESENT	PRESENT	PRESENT	PRESENT	PRESENT	PRESENT	PRESENT	PRESENT	PRESENT
ERR720252	Klebsiella pneumoniae	TG12372	USA	ERR720252	Struve et al.	human		2000	PRESENT	PRESENT	PRESENT	PRESENT	PRESENT	PRESENT	PRESENT	PRESENT	PRESENT
ERR720251	Klebsiella pneumoniae	TG12366	USA	ERR720251	Struve et al.	human		1999	PRESENT	PRESENT	PRESENT	PRESENT	PRESENT	PRESENT	PRESENT	PRESENT	PRESENT
ERR720250	Klebsiella pneumoniae	TG12357	USA	ERR720250	Struve et al.	human		1999	PRESENT	PRESENT	PRESENT	PRESENT	PRESENT	PRESENT	PRESENT	PRESENT	PRESENT
ERR720249	Klebsiella pneumoniae	TG12354	USA	ERR720249	Struve et al.	human		1999	PRESENT	PRESENT	PRESENT	PRESENT	PRESENT	PRESENT	PRESENT	PRESENT	PRESENT
ERR720248	Klebsiella pneumoniae	TG12351	USA	ERR720248	Struve et al.	human		2006	PRESENT	PRESENT	PRESENT	PRESENT	PRESENT	PRESENT	PRESENT	PRESENT	PRESENT
ERR720247	Klebsiella pneumoniae	TG12336	USA	ERR720247	Struve et al.	human	infection	2006	PRESENT	PRESENT	PRESENT	PRESENT	PRESENT	PRESENT	PRESENT	PRESENT	PRESENT
ERR720246	Klebsiella pneumoniae	TG12333	USA	ERR720246	Struve et al.	human	infection	2006	PRESENT	PRESENT	PRESENT	PRESENT	PRESENT	PRESENT	PRESENT	PRESENT	PRESENT
ERR720245	Klebsiella pneumoniae	TG04605	USA	ERR720245	Struve et al.	human	infection	2005	PRESENT	PRESENT	PRESENT	PRESENT	PRESENT	PRESENT	PRESENT	PRESENT	PRESENT
ERR720244	Klebsiella pneumoniae	TG04601	USA	ERR720244	Struve et al.	human	infection	2005	PRESENT	PRESENT	PRESENT	PRESENT	PRESENT	PRESENT	PRESENT	PRESENT	PRESENT
ERR718793	Klebsiella pneumoniae	CAS951	Norway	ERR718793	Struve et al.	human	infection	2012	PRESENT	PRESENT	PRESENT	PRESENT	PRESENT	CONTIG	PRESENT	PRESENT	ABSENT
ERR713648	Klebsiella pneumoniae	Sp221	Denmark	ERR713648	Struve et al.	human	infection	1990-1992	PRESENT	PRESENT	PRESENT	PRESENT	PRESENT	PRESENT	PRESENT	PRESENT	PRESENT
ERR713647	Klebsiella pneumoniae	Sp29	Denmark	ERR713647	Struve et al.	human	infection	1990-1992	PRESENT	PRESENT	PRESENT	PRESENT	PRESENT	PRESENT	PRESENT	PRESENT	PRESENT
ERR713646	Klebsiella pneumoniae	8045		ERR713646	Struve et al.	human	infection		PRESENT	PRESENT	PRESENT	PRESENT	PRESENT	PRESENT	PRESENT	PRESENT	PRESENT
ERR713645	Klebsiella pneumoniae	A5054		ERR713645	Struve et al.	human	infection		PRESENT	PRESENT	PRESENT	PRESENT	PRESENT	PRESENT	PRESENT	PRESENT	PRESENT
ERR713644	Klebsiella pneumoniae	CAS813	Denmark	ERR713644	Struve et al.	human	infection	2008	PRESENT	PRESENT	PRESENT	PRESENT	PRESENT	PRESENT	PRESENT	PRESENT	PRESENT
ERR713643	Klebsiella pneumoniae	CAS727	Norway	ERR713643	Struve et al.	human	infection	2008	PRESENT	PRESENT	PRESENT	PRESENT	PRESENT	PRESENT	PRESENT	PRESENT	PRESENT
ERR713642	Klebsiella pneumoniae	CAS726	Sweden	ERR713642	Struve et al.	human	infection	2008	PRESENT	PRESENT	PRESENT	PRESENT	PRESENT	PRESENT	PRESENT	PRESENT	PRESENT
ERR713641	Klebsiella pneumoniae	CAS698	USA	ERR713641	Struve et al.	human	infection	2006	PRESENT	PRESENT	PRESENT	PRESENT	PRESENT	PRESENT	PRESENT	PRESENT	PRESENT
ERR713524	Klebsiella pneumoniae	CAS690	Canada	ERR713524	Struve et al.	human	infection	2005	PRESENT	PRESENT	PRESENT	PRESENT	PRESENT	PRESENT	PRESENT	PRESENT	PRESENT
ERR713523	Klebsiella pneumoniae	CAS686	Taiwan	ERR713523	Struve et al.	human	infection	1996	PRESENT	PRESENT	PRESENT	PRESENT	PRESENT	PRESENT	PRESENT	PRESENT	PRESENT
ERR713522	Klebsiella pneumoniae	CAS691	Canada	ERR713522	Struve et al.	human	infection	2005	PRESENT	PRESENT	PRESENT	PRESENT	PRESENT	PRESENT	PRESENT	PRESENT	PRESENT
ERR713521	Klebsiella pneumoniae	CAS683	USA	ERR713521	Struve et al.	human	infection	2004	PRESENT	PRESENT	PRESENT	PRESENT	PRESENT	PRESENT	PRESENT	PRESENT	PRESENT
ERR712904	Klebsiella pneumoniae	CAS992	South Africa	ERR712904	Struve et al.	human	infection	1997	AMBIGUOUS	AMBIGUOUS	PRESENT	PRESENT	PRESENT	PRESENT	AMBIGUOUS	ABSENT	CONTIG
ERR712903	Klebsiella pneumoniae	CAS991	South Africa	ERR712903	Struve et al.	human	infection	1997	PRESENT	PRESENT	PRESENT	PRESENT	PRESENT	PRESENT	PRESENT	PRESENT	PRESENT
ERR712902	Klebsiella pneumoniae	CAS990	South Africa	ERR712902	Struve et al.	human	infection	1996	PRESENT	ABSENT	CONTIG	PRESENT	PRESENT	PARTIAL	PRESENT	ABSENT	ABSENT
ERR712901	Klebsiella pneumoniae	CAS989	South Africa	ERR712901	Struve et al.	human	infection	1996	PRESENT	PRESENT	PRESENT	PRESENT	PRESENT	PRESENT	PRESENT	PRESENT	PRESENT
ERR712900	Klebsiella pneumoniae	CAS988	Taiwan	ERR712900	Struve et al.	human	infection	1997	PRESENT	PRESENT	PRESENT	PRESENT	PRESENT	PRESENT	PRESENT	PRESENT	PRESENT
ERR712899	Klebsiella pneumoniae	CAS987	Taiwan	ERR712899	Struve et al.	human	infection	1996	PRESENT	PRESENT	PRESENT	PRESENT	PRESENT	PRESENT	PRESENT	PRESENT	PRESENT
ERR712794	Klebsiella pneumoniae	CAS986	Taiwan	ERR712794	Struve et al.	human	infection	1996	PRESENT	PRESENT	PRESENT	PRESENT	PRESENT	PRESENT	PRESENT	PRESENT	PRESENT
ERR712793	Klebsiella pneumoniae	CAS985	Taiwan	ERR712793	Struve et al.	human	infection	1996	PRESENT	PRESENT	PRESENT	PRESENT	PRESENT	PRESENT	PRESENT	PRESENT	PRESENT
ERR712792	Klebsiella pneumoniae	CAS984	Taiwan	ERR712792	Struve et al.	human	infection	1996	PRESENT	PRESENT	PRESENT	PRESENT	PRESENT	PRESENT	PRESENT	PRESENT	PRESENT
ERR712791	Klebsiella pneumoniae	CAS983	Taiwan	ERR712791	Struve et al.	human	infection	1996	PRESENT	PRESENT	PRESENT	PRESENT	PRESENT	PRESENT	PRESENT	PRESENT	PRESENT
ERR712790	Klebsiella pneumoniae	CAS906	Norway	ERR712790	Struve et al.	human	infection	2010	PRESENT	PRESENT	PRESENT	PRESENT	PRESENT	PRESENT	PRESENT	PRESENT	PRESENT
ERR712789	Klebsiella pneumoniae	CAS905	Norway	ERR712789	Struve et al.	human	infection	2010	PRESENT	PRESENT	PRESENT	PRESENT	PRESENT	PRESENT	PRESENT	PRESENT	PRESENT
ERR712626	Klebsiella pneumoniae	CAS701	USA	ERR712626	Struve et al.	human	infection	2007	PRESENT	PRESENT	PRESENT	PRESENT	PRESENT	PRESENT	PRESENT	PRESENT	PRESENT
ERR712625	Klebsiella pneumoniae	CAS699	USA	ERR712625	Struve et al.	human	infection	2007	PRESENT	PRESENT	PRESENT	PRESENT	PRESENT	PRESENT	PRESENT	PRESENT	PRESENT
ERR712624	Klebsiella pneumoniae	CAS695	Canada	ERR712624	Struve et al.	human	infection	2006	PRESENT	PRESENT	PRESENT	PRESENT	PRESENT	PRESENT	PRESENT	PRESENT	PRESENT
ERR712623	Klebsiella pneumoniae	CAS694	Canada	ERR712623	Struve et al.	human	infection	2006	PRESENT	PRESENT	PRESENT	PRESENT	PRESENT	PRESENT	PRESENT	PRESENT	PRESENT
ERR706870	Klebsiella pneumoniae	CAS692	Canada	ERR706870	Struve et al.	human	infection	2006	PRESENT	PRESENT	PRESENT	PRESENT	PRESENT	PRESENT	PRESENT	PRESENT	PRESENT
ERR706869	Klebsiella pneumoniae	CAS689	Canada	ERR706869	Struve et al.	human	infection	2005	PRESENT	PRESENT	PRESENT	PRESENT	PRESENT	PRESENT	PRESENT	PRESENT	PRESENT
ERR706868	Klebsiella pneumoniae	CAS688	USA	ERR706868	Struve et al.	human	infection	2005	PRESENT	PRESENT	PRESENT	PRESENT	PRESENT	PRESENT	PRESENT	PRESENT	PRESENT
ERR699269	Klebsiella pneumoniae	CAS687	USA	ERR699269	Struve et al.	human	infection	2005	PRESENT	PRESENT	PRESENT	PRESENT	PRESENT	PRESENT	PRESENT	PRESENT	PRESENT
ERR699266	Klebsiella pneumoniae	CAS685	USA	ERR699266	Struve et al.	human	infection	2005	PRESENT	PRESENT	PRESENT	PRESENT	PRESENT	PRESENT	PRESENT	PRESENT	PRESENT
ERR562360	Klebsiella pneumoniae	SB4698	France	ERR562360	Bialek-Davenet et al.	human	infection	2012	PRESENT	PRESENT	PRESENT	PRESENT	PRESENT	PRESENT	PRESENT	PRESENT	PRESENT
ERR562359	Klebsiella pneumoniae	SB4565	France	ERR562359	Bialek-Davenet et al.	human	infection	2011	PRESENT	PRESENT	PRESENT	PRESENT	PRESENT	PRESENT	PARTIAL	PRESENT	PRESENT
ERR562357	Klebsiella pneumoniae	SB4467	France	ERR562357	Bialek-Davenet et al.	human	infection	2011	PRESENT	PRESENT	PRESENT	PRESENT	PRESENT	PRESENT	PRESENT	PRESENT	PRESENT
ERR562354	Klebsiella pneumoniae	SB3927	Taiwan	ERR562354	Bialek-Davenet et al.	human	infection		PRESENT	PRESENT	PRESENT	PRESENT	PRESENT	PRESENT	PRESENT	PRESENT	PRESENT
ERR562353	Klebsiella pneumoniae	SB3926	Taiwan	ERR562353	Bialek-Davenet et al.	human	infection		PRESENT	PRESENT	PRESENT	PRESENT	PRESENT	PRESENT	PRESENT	PRESENT	PRESENT
ERR560525	Klebsiella pneumoniae	SB4763	France	ERR560525	Bialek-Davenet et al.	human	infection	2012	PRESENT	PRESENT	PRESENT	PRESENT	PRESENT	PRESENT	PRESENT	PRESENT	PRESENT
ERR560524	Klebsiella pneumoniae	SB4762	France	ERR560524	Bialek-Davenet et al.	human	infection	1992	PRESENT	PRESENT	PRESENT	PRESENT	PRESENT	PRESENT	PRESENT	PRESENT	PRESENT
ERR560523	Klebsiella pneumoniae	SB4722	Madagascar	ERR560523	Bialek-Davenet et al.	human	infection	2007	PRESENT	PRESENT	PRESENT	PRESENT	PRESENT	PRESENT	PRESENT	PRESENT	PRESENT
ERR560522	Klebsiella pneumoniae	SB4721	Vietnam	ERR560522	Bialek-Davenet et al.	human	infection	2008	PRESENT	PRESENT	PRESENT	PRESENT	PRESENT	PRESENT	PRESENT	PRESENT	PRESENT
ERR560521	Klebsiella pneumoniae	SB4720	Madagascar	ERR560521	Bialek-Davenet et al.	human	infection	2007	PRESENT	PRESENT	PRESENT	PRESENT	PRESENT	PRESENT	PRESENT	PRESENT	PRESENT
ERR560520	Klebsiella pneumoniae	SB4539	France	ERR560520	Bialek-Davenet et al.	human	infection	2008	PRESENT	PRESENT	PRESENT	PRESENT	PRESENT	PRESENT	PRESENT	PRESENT	PRESENT
ERR560519	Klebsiella pneumoniae	SB4538	France	ERR560519	Bialek-Davenet et al.	human	infection	2008	PRESENT	PRESENT	PRESENT	PRESENT	PRESENT	PRESENT	PRESENT	PRESENT	PRESENT
ERR560518	Klebsiella pneumoniae	SB4537	France	ERR560518	Bialek-Davenet et al.	human	infection	2008	PRESENT	PRESENT	PRESENT	PRESENT	PRESENT	CONTIG	PARTIAL	PRESENT	ABSENT
ERR560517	Klebsiella pneumoniae	SB4534	France	ERR560517	Bialek-Davenet et al.	human	infection	2010	PRESENT	PRESENT	PRESENT	PRESENT	PRESENT	PRESENT	PRESENT	PRESENT	PRESENT
ERR560516	Klebsiella pneumoniae	SB4533	France	ERR560516	Bialek-Davenet et al.	human	infection	2010	PRESENT	PRESENT	PRESENT	PRESENT	PRESENT	PRESENT	PRESENT	PRESENT	PRESENT
ERR560515	Klebsiella pneumoniae	SB4523	France	ERR560515	Bialek-Davenet et al.	human	infection		PRESENT	PRESENT	PRESENT	PRESENT	PRESENT	PRESENT	PRESENT	PRESENT	PRESENT
ERR560514	Klebsiella pneumoniae	SB4519	France	ERR560514	Bialek-Davenet et al.	human	infection		PRESENT	PRESENT	PRESENT	PRESENT	PRESENT	PRESENT	PRESENT	PRESENT	PRESENT
ERR560513	Klebsiella pneumoniae	SB4472	France	ERR560513	Bialek-Davenet et al.	lemur	infection	1987	PRESENT	PRESENT	PRESENT	PRESENT	PRESENT	PRESENT	PRESENT	PRESENT	PRESENT
ERR560512	Klebsiella pneumoniae	SB4454	Taiwan	ERR560512	Bialek-Davenet et al.	human	infection		PRESENT	PARTIAL	PRESENT	PRESENT	PRESENT	CONTIG	AMBIGUOUS	CONTIG	ABSENT
ERR560511	Klebsiella pneumoniae	SB4449	France	ERR560511	Bialek-Davenet et al.	human	infection	2010	PRESENT	PRESENT	PRESENT	PRESENT	PRESENT	PRESENT	PRESENT	PRESENT	PRESENT
ERR560510	Klebsiella pneumoniae	SB4448	France	ERR560510	Bialek-Davenet et al.	human	infection	2010	PRESENT	PRESENT	PRESENT	PRESENT	PRESENT	PRESENT	PARTIAL	PRESENT	CONTIG
ERR560508	Klebsiella pneumoniae	SB4446	France	ERR560508	Bialek-Davenet et al.	human	infection		PRESENT	PRESENT	PRESENT	PRESENT	PRESENT	PRESENT	PRESENT	PRESENT	PRESENT
ERR560505	Klebsiella pneumoniae	SB4384	France	ERR560505	Bialek-Davenet et al.	human	infection		PRESENT	PRESENT	PRESENT	PRESENT	PRESENT	PRESENT	PRESENT	PRESENT	PRESENT
ERR560503	Klebsiella pneumoniae	SB4312	France	ERR560503	Bialek-Davenet et al.	human	infection	2009	PRESENT	PRESENT	PRESENT	PRESENT	PRESENT	PRESENT	PRESENT	PRESENT	PRESENT
ERR560501	Klebsiella pneumoniae	SB3431	France	ERR560501	Bialek-Davenet et al.	human	infection		PRESENT	PRESENT	PRESENT	PRESENT	PRESENT	CONTIG	PARTIAL	PRESENT	ABSENT
ERR560500	Klebsiella pneumoniae	SB3332	Martinique	ERR560500	Bialek-Davenet et al.	human	infection	2003	PRESENT	PRESENT	PRESENT	PRESENT	PRESENT	CONTIG	PARTIAL	PRESENT	ABSENT
ERR560499	Klebsiella pneumoniae	SB3197		ERR560499	Bialek-Davenet et al.				PRESENT	PRESENT	PRESENT	PRESENT	PRESENT	PRESENT	PRESENT	PRESENT	PRESENT
ERR349854	Klebsiella pneumoniae	599	Nepal	ERR349854	The et al.	human	infection	2012	PRESENT	PRESENT	PRESENT	PRESENT	PRESENT	PRESENT	PRESENT	PRESENT	PRESENT
ERR349853	Klebsiella pneumoniae	588	Nepal	ERR349853	The et al.	human	infection	2012	PRESENT	PRESENT	PRESENT	PRESENT	PRESENT	PRESENT	PRESENT	PRESENT	PRESENT
ERR349849	Klebsiella pneumoniae	577	Nepal	ERR349849	The et al.	human	infection	2012	PRESENT	PRESENT	PRESENT	PRESENT	PRESENT	PRESENT	PRESENT	PRESENT	PRESENT
ERR349848	Klebsiella pneumoniae	573	Nepal	ERR349848	The et al.	human	infection	2012	PRESENT	PRESENT	PRESENT	PRESENT	PRESENT	PRESENT	PRESENT	PRESENT	PRESENT
ERR349847	Klebsiella pneumoniae	573	Nepal	ERR349847	The et al.	human	infection	2012	PRESENT	PRESENT	PRESENT	PRESENT	PRESENT	PRESENT	PRESENT	PRESENT	PRESENT
ERR349846	Klebsiella pneumoniae	570	Nepal	ERR349846	The et al.	human	infection	2012	PRESENT	PRESENT	PRESENT	PRESENT	PRESENT	PRESENT	PRESENT	PRESENT	PRESENT
ERR349845	Klebsiella pneumoniae	568	Nepal	ERR349845	The et al.	human	infection	2012	PRESENT	PRESENT	PRESENT	PRESENT	PRESENT	PRESENT	PRESENT	PRESENT	PRESENT
ERR349844	Klebsiella pneumoniae	567	Nepal	ERR349844	The et al.	human		2012	PRESENT	PRESENT	PRESENT	PRESENT	PRESENT	PRESENT	PRESENT	PRESENT	PRESENT
ERR349843	Klebsiella pneumoniae	558	Nepal	ERR349843	The et al.	human	infection	2012	PRESENT	PRESENT	PRESENT	PRESENT	PRESENT	PRESENT	PRESENT	PRESENT	PRESENT
ERR349842	Klebsiella pneumoniae	550	Nepal	ERR349842	The et al.	human	infection	2012	PRESENT	PRESENT	PRESENT	PRESENT	PRESENT	PRESENT	PRESENT	PRESENT	PRESENT
ERR349841	Klebsiella pneumoniae	544	Nepal	ERR349841	The et al.	human	infection	2012	PRESENT	PRESENT	PRESENT	PRESENT	PRESENT	PRESENT	PRESENT	PRESENT	PRESENT
ERR349839	Klebsiella pneumoniae	540	Nepal	ERR349839	The et al.	human	infection	2012	PRESENT	PRESENT	PRESENT	PRESENT	PRESENT	PRESENT	PRESENT	PRESENT	PRESENT
ERR349838	Klebsiella pneumoniae	539	Nepal	ERR349838	The et al.	human	infection	2012	PRESENT	PRESENT	PRESENT	PRESENT	PRESENT	PRESENT	PRESENT	PRESENT	PRESENT
ERR349835	Klebsiella pneumoniae	526	Nepal	ERR349835	The et al.	human	infection	2012	PRESENT	PRESENT	PRESENT	PRESENT	PRESENT	PRESENT	PRESENT	PRESENT	PRESENT
ERR349834	Klebsiella pneumoniae	524	Nepal	ERR349834	The et al.	human		2012	PRESENT	PRESENT	PRESENT	PRESENT	PRESENT	PRESENT	PRESENT	PRESENT	PRESENT
ERR349833	Klebsiella pneumoniae	519	Nepal	ERR349833	The et al.	human	infection	2012	PRESENT	PRESENT	PRESENT	PRESENT	PRESENT	PRESENT	PRESENT	PRESENT	PRESENT
ERR349828	Klebsiella pneumoniae	501	Nepal	ERR349828	The et al.	human	infection	2012	PRESENT	PRESENT	PRESENT	PRESENT	PRESENT	PRESENT	PRESENT	PRESENT	PRESENT
ERR349826	Klebsiella pneumoniae	486	Nepal	ERR349826	The et al.	human	infection	2012	PRESENT	PRESENT	PRESENT	PRESENT	PRESENT	PRESENT	PRESENT	PRESENT	PRESENT
ERR349825	Klebsiella pneumoniae	484	Nepal	ERR349825	The et al.	human		2012	PRESENT	PRESENT	PRESENT	PRESENT	PRESENT	PRESENT	PRESENT	PRESENT	PRESENT
ERR349824	Klebsiella pneumoniae	482	Nepal	ERR349824	The et al.	human	infection	2012	PRESENT	PRESENT	PRESENT	PRESENT	PRESENT	PRESENT	PRESENT	PRESENT	PRESENT
ERR349823	Klebsiella pneumoniae	458	Nepal	ERR349823	The et al.	human		2012	PRESENT	PRESENT	PRESENT	PRESENT	PRESENT	PRESENT	PRESENT	PRESENT	PRESENT
ERR349822	Klebsiella pneumoniae	448	Nepal	ERR349822	The et al.	human	infection	2012	PRESENT	PRESENT	PRESENT	PRESENT	PRESENT	PRESENT	PRESENT	PRESENT	PRESENT
ERR349821	Klebsiella pneumoniae	446	Nepal	ERR349821	The et al.	human	infection	2012	PRESENT	PRESENT	PRESENT	PRESENT	PRESENT	PRESENT	PRESENT	PRESENT	PRESENT
ERR349820	Klebsiella pneumoniae	441	Nepal	ERR349820	The et al.	human		2012	PRESENT	PRESENT	PRESENT	PRESENT	PRESENT	PRESENT	PRESENT	PRESENT	PRESENT
ERR349819	Klebsiella pneumoniae	435	Nepal	ERR349819	The et al.	human		2012	PRESENT	PRESENT	PRESENT	PRESENT	PRESENT	PRESENT	PRESENT	PRESENT	PRESENT
ERR349818	Klebsiella pneumoniae	434	Nepal	ERR349818	The et al.	human	infection	2012	PRESENT	PRESENT	PRESENT	PRESENT	PRESENT	PRESENT	PRESENT	PRESENT	PRESENT
ERR349817	Klebsiella pneumoniae	432	Nepal	ERR349817	The et al.	human		2012	PRESENT	PRESENT	PRESENT	PRESENT	PRESENT	PRESENT	PRESENT	PRESENT	PRESENT
ERR349816	Klebsiella pneumoniae	426	Nepal	ERR349816	The et al.	human	infection	2012	PRESENT	PRESENT	PRESENT	PRESENT	PRESENT	PRESENT	PRESENT	PRESENT	PRESENT
ERR349815	Klebsiella pneumoniae	424	Nepal	ERR349815	The et al.	human	infection	2012	PRESENT	PRESENT	PRESENT	PRESENT	PRESENT	PRESENT	PRESENT	PRESENT	PRESENT
ERR349814	Klebsiella pneumoniae	422	Nepal	ERR349814	The et al.	human		2012	PRESENT	PRESENT	PRESENT	PRESENT	PRESENT	PRESENT	PRESENT	PRESENT	PRESENT
ERR349813	Klebsiella pneumoniae	420	Nepal	ERR349813	The et al.	human		2012	PRESENT	PRESENT	PRESENT	PRESENT	PRESENT	PRESENT	PRESENT	PRESENT	PRESENT
ERR349812	Klebsiella pneumoniae	412	Nepal	ERR349812	The et al.	human	infection	2012	PRESENT	PRESENT	PRESENT	PRESENT	PRESENT	PRESENT	PRESENT	PRESENT	PRESENT
ERR349811	Klebsiella pneumoniae	405	Nepal	ERR349811	The et al.	human	infection	2012	PRESENT	PRESENT	PRESENT	PRESENT	PRESENT	PRESENT	PRESENT	PRESENT	PRESENT
ERR349808	Klebsiella pneumoniae	352	Nepal	ERR349808	The et al.	human		2012	PRESENT	PRESENT	PRESENT	PRESENT	PRESENT	PRESENT	PRESENT	PRESENT	PRESENT
ERR349807	Klebsiella pneumoniae	329	Nepal	ERR349807	The et al.	human	infection	2012	PRESENT	PRESENT	PRESENT	PRESENT	PRESENT	PRESENT	PRESENT	PRESENT	PRESENT
ERR349806	Klebsiella pneumoniae	321	Nepal	ERR349806	The et al.	human	infection	2012	PRESENT	PRESENT	PRESENT	PRESENT	PRESENT	PRESENT	PRESENT	PRESENT	PRESENT
ERR349805	Klebsiella pneumoniae	320	Nepal	ERR349805	The et al.	human	infection	2012	PRESENT	PRESENT	PRESENT	PRESENT	PRESENT	PRESENT	PRESENT	PRESENT	PRESENT
ERR349803	Klebsiella pneumoniae	305	Nepal	ERR349803	The et al.	human	infection	2012	PRESENT	PRESENT	PRESENT	PRESENT	PRESENT	PRESENT	PRESENT	PRESENT	PRESENT
ERR349800	Klebsiella pneumoniae	283	Nepal	ERR349800	The et al.	human		2012	PRESENT	PRESENT	PRESENT	PRESENT	PRESENT	PRESENT	PRESENT	PRESENT	PRESENT
ERR349799	Klebsiella pneumoniae	281	Nepal	ERR349799	The et al.	human		2012	PRESENT	PRESENT	PRESENT	PRESENT	PRESENT	PRESENT	PRESENT	PRESENT	PRESENT
ERR349798	Klebsiella pneumoniae	276	Nepal	ERR349798	The et al.	human	infection	2012	PRESENT	PRESENT	PRESENT	PRESENT	PRESENT	PRESENT	PRESENT	PRESENT	PRESENT
ERR349797	Klebsiella pneumoniae	273	Nepal	ERR349797	The et al.	human	infection	2012	PRESENT	PRESENT	PRESENT	PRESENT	PRESENT	PRESENT	PRESENT	PRESENT	PRESENT
ERR349795	Klebsiella pneumoniae	270	Nepal	ERR349795	The et al.	human	infection	2012	PRESENT	PRESENT	PRESENT	PRESENT	PRESENT	PRESENT	PRESENT	PRESENT	PRESENT
ERR349793	Klebsiella quasipneumoniae subsp. similipneumoniae	262	Nepal	ERR349793	The et al.	human	infection	2012	PRESENT	PRESENT	PRESENT	PRESENT	PRESENT	PRESENT	PRESENT	PRESENT	PRESENT
ERR349791	Klebsiella pneumoniae	237	Nepal	ERR349791	The et al.	human	infection	2012	PRESENT	PRESENT	PRESENT	PRESENT	PRESENT	PRESENT	PRESENT	PRESENT	PRESENT
ERR349790	Klebsiella pneumoniae	234	Nepal	ERR349790	The et al.	human	infection	2012	PRESENT	PRESENT	PRESENT	PRESENT	PRESENT	PRESENT	PRESENT	PRESENT	PRESENT
ERR349789	Klebsiella pneumoniae	230	Nepal	ERR349789	The et al.	human	infection	2012	PRESENT	PRESENT	PRESENT	PRESENT	PRESENT	PRESENT	PRESENT	PRESENT	PRESENT
ERR349788	Klebsiella pneumoniae	225	Nepal	ERR349788	The et al.	human	infection	2012	PRESENT	PRESENT	PRESENT	PRESENT	PRESENT	PRESENT	PRESENT	PRESENT	PRESENT
ERR349787	Klebsiella pneumoniae	215	Nepal	ERR349787	The et al.	human	infection	2012	PRESENT	PRESENT	PRESENT	PRESENT	PRESENT	PRESENT	PRESENT	PRESENT	PRESENT
ERR349786	Klebsiella pneumoniae	214	Nepal	ERR349786	The et al.	human	infection	2012	PRESENT	PRESENT	PRESENT	PRESENT	PRESENT	PRESENT	PRESENT	PRESENT	PRESENT
ERR349785	Klebsiella pneumoniae	212	Nepal	ERR349785	The et al.	human	infection	2012	PRESENT	PRESENT	PRESENT	PRESENT	PRESENT	PRESENT	PRESENT	PRESENT	PRESENT
ERR349784	Klebsiella pneumoniae	209	Nepal	ERR349784	The et al.	human	carriage	2012	PRESENT	PRESENT	PRESENT	PRESENT	PRESENT	PRESENT	PRESENT	PRESENT	PRESENT
ERR349780	Klebsiella pneumoniae	186	Nepal	ERR349780	The et al.	human	infection	2012	PRESENT	PRESENT	PRESENT	PRESENT	PRESENT	PRESENT	PRESENT	PRESENT	PRESENT
ERR349777	Klebsiella pneumoniae	170	Nepal	ERR349777	The et al.	human	infection	2012	PRESENT	PRESENT	PRESENT	PRESENT	PRESENT	PRESENT	PRESENT	PRESENT	PRESENT
ERR349775	Klebsiella pneumoniae	159	Nepal	ERR349775	The et al.	human		2012	PRESENT	PRESENT	PRESENT	PRESENT	PRESENT	PRESENT	PRESENT	PRESENT	PRESENT
ERR349774	Klebsiella pneumoniae	157	Nepal	ERR349774	The et al.	human	carriage	2012	PRESENT	PRESENT	PRESENT	PRESENT	PRESENT	PRESENT	PRESENT	PRESENT	PRESENT
ERR349773	Klebsiella pneumoniae	153	Nepal	ERR349773	The et al.	human		2012	PRESENT	PRESENT	PRESENT	PRESENT	PRESENT	PRESENT	PRESENT	PRESENT	PRESENT
ERR349770	Klebsiella pneumoniae	139	Nepal	ERR349770	The et al.	human	infection	2012	PRESENT	PRESENT	PRESENT	PRESENT	PRESENT	PRESENT	PRESENT	PRESENT	PRESENT
ERR349769	Klebsiella pneumoniae	137	Nepal	ERR349769	The et al.	human		2012	PRESENT	PRESENT	PRESENT	PRESENT	PRESENT	PRESENT	PRESENT	PRESENT	PRESENT
ERR349768	Klebsiella pneumoniae	136	Nepal	ERR349768	The et al.	human	infection	2012	PRESENT	PRESENT	PRESENT	PRESENT	PRESENT	PRESENT	PRESENT	PRESENT	PRESENT
ERR349767	Klebsiella pneumoniae	132	Nepal	ERR349767	The et al.	human	infection	2012	PRESENT	PRESENT	PRESENT	PRESENT	PRESENT	PRESENT	PRESENT	PRESENT	PRESENT
ERR349766	Klebsiella pneumoniae	131	Nepal	ERR349766	The et al.	human	infection	2012	PRESENT	PRESENT	PRESENT	PRESENT	PRESENT	PRESENT	PRESENT	PRESENT	PRESENT
ERR349765	Klebsiella pneumoniae	127	Nepal	ERR349765	The et al.	human	infection	2012	PRESENT	PRESENT	PRESENT	PRESENT	PRESENT	PRESENT	PRESENT	PRESENT	PRESENT
ERR349764	Klebsiella pneumoniae	126	Nepal	ERR349764	The et al.	human	infection	2012	PRESENT	PRESENT	PRESENT	PRESENT	PRESENT	PRESENT	PRESENT	PRESENT	PRESENT
ERR349763	Klebsiella pneumoniae	120	Nepal	ERR349763	The et al.	human	infection	2012	PRESENT	PRESENT	PRESENT	PRESENT	PRESENT	PRESENT	PRESENT	PRESENT	PRESENT
ERR349759	Klebsiella pneumoniae	108	Nepal	ERR349759	The et al.	human	infection	2012	PRESENT	PRESENT	PRESENT	PRESENT	PRESENT	PRESENT	PRESENT	PRESENT	PRESENT
ERR349757	Klebsiella pneumoniae	98	Nepal	ERR349757	The et al.	human	infection	2012	PRESENT	PRESENT	PRESENT	PRESENT	PRESENT	PRESENT	PRESENT	PRESENT	PRESENT
ERR349756	Klebsiella pneumoniae	94	Nepal	ERR349756	The et al.	human	infection	2012	PRESENT	PRESENT	PRESENT	PRESENT	PRESENT	PRESENT	PRESENT	PRESENT	PRESENT
ERR349755	Klebsiella pneumoniae	93	Nepal	ERR349755	The et al.	human	infection	2012	PRESENT	PRESENT	PRESENT	PRESENT	PRESENT	PRESENT	PRESENT	PRESENT	PRESENT
ERR349754	Klebsiella pneumoniae	86	Nepal	ERR349754	The et al.	human	infection	2012	PRESENT	PRESENT	PRESENT	PRESENT	PRESENT	PRESENT	PRESENT	PRESENT	PRESENT
ERR349753	Klebsiella pneumoniae	81	Nepal	ERR349753	The et al.	human	infection	2012	PRESENT	PRESENT	PRESENT	PRESENT	PRESENT	PRESENT	PRESENT	PRESENT	PRESENT
ERR349752	Klebsiella pneumoniae	80	Nepal	ERR349752	The et al.	human	infection	2012	PRESENT	PRESENT	PRESENT	PRESENT	PRESENT	PRESENT	PRESENT	PRESENT	PRESENT
ERR349751	Klebsiella pneumoniae	72	Nepal	ERR349751	The et al.	human		2012	PRESENT	PRESENT	PRESENT	PRESENT	PRESENT	PRESENT	PRESENT	PRESENT	PRESENT
ERR349749	Klebsiella pneumoniae	50	Nepal	ERR349749	The et al.	human	infection	2012	PRESENT	PRESENT	PRESENT	PRESENT	PRESENT	PRESENT	PRESENT	PRESENT	PRESENT
ERR349748	Klebsiella pneumoniae	24	Nepal	ERR349748	The et al.	human		2012	PRESENT	PRESENT	PRESENT	PRESENT	PRESENT	PRESENT	PRESENT	PRESENT	PRESENT
ERR349747	Klebsiella pneumoniae	16	Nepal	ERR349747	The et al.	human	infection	2012	PRESENT	PRESENT	PRESENT	PRESENT	PRESENT	PRESENT	PRESENT	PRESENT	PRESENT
ERR316992	Klebsiella pneumoniae	M585		ERR316992	Wand et al.	human	infection	1940	PRESENT	PRESENT	PRESENT	PRESENT	PRESENT	PRESENT	PRESENT	PRESENT	PRESENT
ERR314567	Klebsiella pneumoniae	unknown	UK	ERR314567	Ellington et al.	human		2007	PRESENT	PRESENT	PRESENT	PRESENT	PRESENT	PRESENT	PRESENT	PRESENT	PRESENT
ERR314565	Klebsiella pneumoniae	unknown	UK	ERR314565	Ellington et al.	human		2007	PRESENT	PRESENT	PRESENT	PRESENT	PRESENT	PRESENT	PRESENT	PRESENT	PRESENT
ERR314564	Klebsiella pneumoniae	unknown	UK	ERR314564	Ellington et al.	human		2007	PRESENT	PRESENT	PRESENT	PRESENT	PRESENT	PRESENT	PRESENT	PRESENT	PRESENT
ERR314563	Klebsiella pneumoniae	unknown	UK	ERR314563	Ellington et al.	human			PRESENT	PRESENT	PRESENT	PRESENT	PRESENT	PRESENT	PRESENT	PRESENT	PRESENT
ERR314562	Klebsiella pneumoniae	unknown	UK	ERR314562	Ellington et al.	human		2007	PRESENT	PRESENT	PRESENT	PRESENT	PRESENT	PRESENT	PRESENT	PRESENT	PRESENT
ERR314561	Klebsiella pneumoniae	unknown	UK	ERR314561	Ellington et al.	human		2007	PRESENT	PRESENT	PRESENT	PRESENT	PRESENT	PRESENT	PRESENT	PRESENT	PRESENT
ERR314560	Klebsiella pneumoniae	unknown	UK	ERR314560	Ellington et al.	human		2006	PRESENT	PRESENT	PRESENT	PRESENT	PRESENT	PRESENT	PRESENT	PRESENT	PRESENT
ERR314558	Klebsiella pneumoniae	unknown	UK	ERR314558	Ellington et al.	human			PRESENT	PRESENT	PRESENT	PRESENT	PRESENT	PRESENT	PRESENT	PRESENT	PRESENT
ERR314557	Klebsiella pneumoniae	unknown	UK	ERR314557	Ellington et al.	human		2012	PRESENT	PRESENT	PRESENT	PRESENT	PRESENT	PRESENT	PRESENT	PRESENT	PRESENT
ERR314556	Klebsiella pneumoniae	unknown	UK	ERR314556	Ellington et al.	human			PRESENT	PRESENT	PRESENT	PRESENT	PRESENT	PRESENT	PRESENT	PRESENT	PRESENT
ERR314555	Klebsiella pneumoniae	unknown	UK	ERR314555	Ellington et al.	human		2012	PRESENT	PRESENT	PRESENT	PRESENT	PRESENT	PRESENT	PRESENT	PRESENT	PRESENT
ERR314554	Klebsiella pneumoniae	unknown	UK	ERR314554	Ellington et al.	human			PRESENT	PRESENT	PRESENT	PRESENT	PRESENT	PRESENT	PRESENT	PRESENT	PRESENT
ERR314553	Klebsiella pneumoniae	unknown	UK	ERR314553	Ellington et al.	human			PRESENT	PRESENT	PRESENT	PRESENT	PRESENT	PRESENT	PRESENT	PRESENT	PRESENT
ERR314551	Klebsiella pneumoniae	unknown	UK	ERR314551	Ellington et al.	human			PRESENT	PRESENT	PRESENT	PRESENT	PRESENT	PRESENT	PRESENT	PRESENT	PRESENT
ERR314550	Klebsiella pneumoniae	unknown	UK	ERR314550	Ellington et al.	human		2012	PRESENT	PRESENT	PRESENT	PRESENT	PRESENT	PRESENT	PRESENT	PRESENT	PRESENT
ERR314549	Klebsiella pneumoniae	unknown	UK	ERR314549	Ellington et al.	human		2012	PRESENT	PRESENT	PRESENT	PRESENT	PRESENT	PRESENT	PRESENT	PRESENT	PRESENT
ERR314547	Klebsiella pneumoniae	unknown	UK	ERR314547	Ellington et al.	human		2012	PRESENT	PRESENT	PRESENT	PRESENT	PRESENT	PRESENT	PRESENT	PRESENT	PRESENT
ERR314546	Klebsiella pneumoniae	unknown	UK	ERR314546	Ellington et al.	human			PRESENT	PRESENT	PRESENT	PRESENT	PRESENT	PRESENT	PRESENT	PRESENT	PRESENT
ERR314545	Klebsiella pneumoniae	unknown	UK	ERR314545	Ellington et al.	human			PRESENT	PRESENT	PRESENT	PRESENT	PRESENT	PRESENT	PRESENT	PRESENT	PRESENT
ERR314544	Klebsiella pneumoniae	unknown	UK	ERR314544	Ellington et al.	human			PRESENT	PRESENT	PRESENT	PRESENT	PRESENT	PRESENT	PRESENT	PRESENT	PRESENT
ERR314542	Klebsiella pneumoniae	unknown	UK	ERR314542	Ellington et al.	human			PRESENT	PRESENT	PRESENT	PRESENT	PRESENT	PRESENT	PRESENT	PRESENT	PRESENT
ERR314541	Klebsiella pneumoniae	unknown	UK	ERR314541	Ellington et al.	human			PRESENT	PRESENT	PRESENT	PRESENT	PRESENT	PRESENT	PRESENT	PRESENT	PRESENT
ERR314538	Klebsiella pneumoniae	unknown	UK	ERR314538	Ellington et al.	human			PRESENT	PRESENT	PRESENT	PRESENT	PRESENT	PRESENT	PRESENT	PRESENT	PRESENT
ERR314537	Klebsiella pneumoniae	unknown	UK	ERR314537	Ellington et al.	human		2012	PRESENT	PRESENT	PRESENT	PRESENT	PRESENT	PRESENT	PRESENT	PRESENT	PRESENT
ERR314536	Klebsiella pneumoniae	unknown	UK	ERR314536	Ellington et al.	human		2012	PRESENT	PRESENT	PRESENT	PRESENT	PRESENT	PRESENT	PRESENT	PRESENT	PRESENT
ERR314535	Klebsiella pneumoniae	unknown	UK	ERR314535	Ellington et al.	human		2012	PRESENT	PRESENT	PRESENT	PRESENT	PRESENT	PRESENT	PRESENT	PRESENT	PRESENT
ERR314534	Klebsiella pneumoniae	unknown	UK	ERR314534	Ellington et al.	human		2012	PRESENT	PRESENT	PRESENT	PRESENT	PRESENT	PRESENT	PRESENT	PRESENT	PRESENT
ERR314533	Klebsiella pneumoniae	unknown	UK	ERR314533	Ellington et al.	human			PRESENT	PRESENT	PRESENT	PRESENT	PRESENT	PRESENT	PRESENT	PRESENT	PRESENT
ERR314532	Klebsiella pneumoniae	unknown	UK	ERR314532	Ellington et al.	human		2012	PRESENT	PRESENT	PRESENT	PRESENT	PRESENT	PRESENT	PRESENT	PRESENT	PRESENT
ERR314531	Klebsiella pneumoniae	unknown	UK	ERR314531	Ellington et al.	human			PRESENT	PRESENT	PRESENT	PRESENT	PRESENT	PRESENT	PRESENT	PRESENT	PRESENT
ERR314530	Klebsiella pneumoniae	unknown	UK	ERR314530	Ellington et al.	human		2012	PRESENT	PRESENT	PRESENT	PRESENT	PRESENT	PRESENT	PRESENT	PRESENT	PRESENT
ERR314529	Klebsiella variicola	unknown	UK	ERR314529	Ellington et al.	human			PRESENT	PRESENT	PRESENT	PRESENT	PRESENT	PRESENT	PRESENT	PRESENT	PRESENT
ERR314528	Klebsiella variicola	unknown	UK	ERR314528	Ellington et al.	human		2012	PRESENT	PRESENT	PRESENT	PRESENT	PRESENT	PRESENT	PRESENT	PRESENT	PRESENT
ERR314527	Klebsiella pneumoniae	unknown	UK	ERR314527	Ellington et al.	human		2012	PRESENT	PRESENT	PRESENT	PRESENT	PRESENT	PRESENT	PRESENT	PRESENT	PRESENT
ERR314525	Klebsiella pneumoniae	unknown	UK	ERR314525	Ellington et al.	human		2012	PRESENT	PRESENT	PRESENT	PRESENT	PRESENT	PRESENT	PRESENT	PRESENT	PRESENT
ERR314524	Klebsiella pneumoniae	unknown	UK	ERR314524	Ellington et al.	human			PRESENT	PRESENT	PRESENT	PRESENT	PRESENT	PRESENT	PRESENT	PRESENT	PRESENT
ERR314523	Klebsiella pneumoniae	unknown	UK	ERR314523	Ellington et al.	human			PRESENT	PRESENT	PRESENT	PRESENT	PRESENT	PRESENT	PRESENT	PRESENT	PRESENT
ERR314522	Klebsiella pneumoniae	unknown	UK	ERR314522	Ellington et al.	human		2011	PRESENT	PRESENT	PRESENT	PRESENT	PRESENT	PRESENT	PRESENT	PRESENT	PRESENT
ERR314520	Klebsiella pneumoniae	unknown	UK	ERR314520	Ellington et al.	human		2011	PRESENT	PRESENT	PRESENT	PRESENT	PRESENT	PRESENT	PRESENT	PRESENT	PRESENT
ERR314519	Klebsiella pneumoniae	unknown	UK	ERR314519	Ellington et al.	human		2011	PRESENT	PRESENT	PRESENT	PRESENT	PRESENT	PRESENT	PRESENT	PRESENT	PRESENT
ERR314515	Klebsiella pneumoniae	unknown	UK	ERR314515	Ellington et al.	human			PRESENT	PRESENT	PRESENT	PRESENT	PRESENT	PRESENT	PRESENT	PRESENT	PRESENT
ERR314514	Klebsiella quasipneumoniae subsp. quasipneumoniae	unknown	UK	ERR314514	Ellington et al.	human		2012	PRESENT	PRESENT	PRESENT	PRESENT	PRESENT	PRESENT	PRESENT	PRESENT	PRESENT
ERR314506	Klebsiella pneumoniae	unknown	UK	ERR314506	Ellington et al.	human		2012	PRESENT	PRESENT	PRESENT	PRESENT	PRESENT	PRESENT	PRESENT	PRESENT	PRESENT
ERR314505	Klebsiella pneumoniae	unknown	UK	ERR314505	Ellington et al.	human		2012	PRESENT	PRESENT	PRESENT	PRESENT	PRESENT	PRESENT	PRESENT	PRESENT	PRESENT
ERR314501	Klebsiella pneumoniae	unknown	UK	ERR314501	Ellington et al.	human		2012	PRESENT	PRESENT	PRESENT	PRESENT	PRESENT	PRESENT	PRESENT	PRESENT	PRESENT
ERR314500	Klebsiella pneumoniae	unknown	UK	ERR314500	Ellington et al.	human		2012	PRESENT	PRESENT	PRESENT	PRESENT	PRESENT	PRESENT	PRESENT	PRESENT	PRESENT
ERR314497	Klebsiella pneumoniae	unknown	UK	ERR314497	Ellington et al.	human			PRESENT	PRESENT	PRESENT	PRESENT	PRESENT	PRESENT	PRESENT	PRESENT	PRESENT
ERR314495	Klebsiella variicola	unknown	UK	ERR314495	Ellington et al.	human		2012	PRESENT	PRESENT	PRESENT	PRESENT	PRESENT	PRESENT	PRESENT	PRESENT	PRESENT
ERR314491	Klebsiella pneumoniae	unknown	UK	ERR314491	Ellington et al.	human		2011	PRESENT	PRESENT	PRESENT	PRESENT	PRESENT	PRESENT	PRESENT	PRESENT	PRESENT
ERR314490	Klebsiella pneumoniae	unknown	UK	ERR314490	Ellington et al.	human			PRESENT	PRESENT	PRESENT	PRESENT	PRESENT	PRESENT	PRESENT	PRESENT	PRESENT
ERR314489	Klebsiella variicola	unknown	UK	ERR314489	Ellington et al.	human		2012	PRESENT	PRESENT	PRESENT	PRESENT	PRESENT	PRESENT	PRESENT	PRESENT	PRESENT
ERR314467	Klebsiella pneumoniae	unknown	UK	ERR314467	Ellington et al.	human		2012	PRESENT	PRESENT	PRESENT	PRESENT	PRESENT	PRESENT	PRESENT	PRESENT	PRESENT
ERR314466	Klebsiella pneumoniae	unknown	UK	ERR314466	Ellington et al.	human		2012	PRESENT	PRESENT	PRESENT	PRESENT	PRESENT	PRESENT	PRESENT	PRESENT	PRESENT
ERR314465	Klebsiella pneumoniae	unknown	UK	ERR314465	Ellington et al.	human		2012	PRESENT	PRESENT	PRESENT	PRESENT	PRESENT	PRESENT	PRESENT	PRESENT	PRESENT
ERR314459	Klebsiella pneumoniae	unknown	UK	ERR314459	Ellington et al.	human		2012	PRESENT	PRESENT	PRESENT	PRESENT	PRESENT	PRESENT	PRESENT	PRESENT	PRESENT
ERR314458	Klebsiella pneumoniae	unknown	UK	ERR314458	Ellington et al.	human		2012	PRESENT	PRESENT	PRESENT	PRESENT	PRESENT	PRESENT	PRESENT	PRESENT	PRESENT
ERR314442	Klebsiella pneumoniae	unknown	UK	ERR314442	Ellington et al.	human		2012	PRESENT	PRESENT	PRESENT	PRESENT	PRESENT	PRESENT	PRESENT	PRESENT	PRESENT
ERR314441	Klebsiella pneumoniae	unknown	UK	ERR314441	Ellington et al.	human		2012	PRESENT	PRESENT	PRESENT	PRESENT	PRESENT	PRESENT	PRESENT	PRESENT	PRESENT
ERR314438	Klebsiella pneumoniae	unknown	UK	ERR314438	Ellington et al.	human		2011	PRESENT	PRESENT	PRESENT	PRESENT	PRESENT	PRESENT	PRESENT	PRESENT	PRESENT
ERR314437	Klebsiella pneumoniae	unknown	UK	ERR314437	Ellington et al.	human			PRESENT	PRESENT	PRESENT	PRESENT	PRESENT	PRESENT	PRESENT	PRESENT	PRESENT
ERR314435	Klebsiella pneumoniae	unknown	UK	ERR314435	Ellington et al.	human		2012	PRESENT	PRESENT	PRESENT	PRESENT	PRESENT	PRESENT	PRESENT	PRESENT	PRESENT
ERR314432	Klebsiella pneumoniae	unknown	UK	ERR314432	Ellington et al.	human		2012	PRESENT	PRESENT	PRESENT	PRESENT	PRESENT	PRESENT	PRESENT	PRESENT	PRESENT
ERR314431	Klebsiella pneumoniae	unknown	UK	ERR314431	Ellington et al.	human		2012	PRESENT	PRESENT	PRESENT	PRESENT	PRESENT	PRESENT	PRESENT	PRESENT	PRESENT
ERR314421	Klebsiella pneumoniae	unknown	UK	ERR314421	Ellington et al.	human		2012	PRESENT	PRESENT	PRESENT	PRESENT	PRESENT	PRESENT	PRESENT	PRESENT	PRESENT
ERR314420	Klebsiella pneumoniae	unknown	UK	ERR314420	Ellington et al.	human		2011	PRESENT	PRESENT	PRESENT	PRESENT	PRESENT	PRESENT	PRESENT	PRESENT	PRESENT
ERR314419	Klebsiella pneumoniae	unknown	UK	ERR314419	Ellington et al.	human		2011	PRESENT	PRESENT	PRESENT	PRESENT	PRESENT	PRESENT	PRESENT	PRESENT	PRESENT
ERR314418	Klebsiella pneumoniae	unknown	UK	ERR314418	Ellington et al.	human		2012	PRESENT	PRESENT	PRESENT	PRESENT	PRESENT	PRESENT	PRESENT	PRESENT	PRESENT
ERR314417	Klebsiella pneumoniae	unknown	UK	ERR314417	Ellington et al.	human		2012	PRESENT	PRESENT	PRESENT	PRESENT	PRESENT	PRESENT	PRESENT	PRESENT	PRESENT
ERR314415	Klebsiella pneumoniae	unknown	UK	ERR314415	Ellington et al.	human		2012	PRESENT	PRESENT	PRESENT	PRESENT	PRESENT	PRESENT	PRESENT	PRESENT	PRESENT
ERR314412	Klebsiella pneumoniae	unknown	UK	ERR314412	Ellington et al.	human		2012	PRESENT	PRESENT	PRESENT	PRESENT	PRESENT	PRESENT	PRESENT	PRESENT	PRESENT
ERR314408	Klebsiella pneumoniae	unknown	UK	ERR314408	Ellington et al.	human		2012	PRESENT	PRESENT	PRESENT	PRESENT	PRESENT	PRESENT	PRESENT	PRESENT	PRESENT
ERR314407	Klebsiella pneumoniae	unknown	UK	ERR314407	Ellington et al.	human		2012	PRESENT	PRESENT	PRESENT	PRESENT	PRESENT	PRESENT	PRESENT	PRESENT	PRESENT
ERR314404	Klebsiella variicola	unknown	UK	ERR314404	Ellington et al.	human		2012	PRESENT	PRESENT	PRESENT	PRESENT	PRESENT	PRESENT	PRESENT	PRESENT	PRESENT
ERR314402	Klebsiella pneumoniae	unknown	UK	ERR314402	Ellington et al.	human		2012	PRESENT	PRESENT	PRESENT	PRESENT	PRESENT	PRESENT	PRESENT	PRESENT	PRESENT
ERR314400	Klebsiella pneumoniae	unknown	UK	ERR314400	Ellington et al.	human		2012	PRESENT	PRESENT	PRESENT	PRESENT	PRESENT	PRESENT	PRESENT	PRESENT	PRESENT
ERR314350	Klebsiella pneumoniae	M433		ERR314350	Wand et al.			1940	PRESENT	PRESENT	PRESENT	PRESENT	PRESENT	PRESENT	PRESENT	PRESENT	PRESENT
ERR314347	Klebsiella pneumoniae	M426		ERR314347	Wand et al.			1940	PRESENT	PRESENT	PRESENT	PRESENT	PRESENT	PRESENT	PRESENT	PRESENT	PRESENT
ERR314345	Klebsiella pneumoniae	M414		ERR314345	Wand et al.			1940	PRESENT	PRESENT	PRESENT	PRESENT	PRESENT	PRESENT	PRESENT	PRESENT	PRESENT
ERR314344	Klebsiella pneumoniae	M403		ERR314344	Wand et al.			1940	PRESENT	PRESENT	PRESENT	PRESENT	PRESENT	PRESENT	STOPS	PRESENT	PRESENT
ERR314342	Klebsiella pneumoniae	M400		ERR314342	Wand et al.			1940	PRESENT	PRESENT	PRESENT	PRESENT	PRESENT	PRESENT	PRESENT	PRESENT	PRESENT
ERR314341	Klebsiella pneumoniae	M399		ERR314341	Wand et al.			1940	PRESENT	PRESENT	PRESENT	PRESENT	PRESENT	PRESENT	PRESENT	PRESENT	PRESENT
ERR314340	Klebsiella pneumoniae	M398		ERR314340	Wand et al.			1940	PRESENT	PRESENT	PRESENT	PRESENT	PRESENT	PRESENT	PRESENT	PRESENT	PRESENT
ERR314330	Klebsiella pneumoniae	M372		ERR314330	Wand et al.			1949	PRESENT	PRESENT	PRESENT	PRESENT	PRESENT	STOPS	PRESENT	PRESENT	PRESENT
ERR314329	Klebsiella pneumoniae	M371		ERR314329	Wand et al.			1949	PRESENT	PRESENT	PRESENT	PRESENT	PRESENT	STOPS	PRESENT	PRESENT	PRESENT
ERR314326	Klebsiella pneumoniae	M345		ERR314326	Wand et al.			1940	PRESENT	PRESENT	PRESENT	PRESENT	PRESENT	PRESENT	PRESENT	PRESENT	PRESENT
ERR314324	Klebsiella pneumoniae	M343		ERR314324	Wand et al.			1946	PRESENT	PRESENT	PRESENT	PRESENT	PRESENT	PRESENT	PRESENT	PRESENT	PRESENT
ERR314323	Klebsiella pneumoniae	M342		ERR314323	Wand et al.			1949	PRESENT	PRESENT	PRESENT	PRESENT	PRESENT	STOPS	PRESENT	PRESENT	PRESENT
ERR311562	Klebsiella pneumoniae	unknown	UK	ERR311562	Ellington et al.	human		2011	PRESENT	PRESENT	PRESENT	PRESENT	PRESENT	PRESENT	PRESENT	PRESENT	PRESENT
ERR311554	Klebsiella variicola	unknown	UK	ERR311554	Ellington et al.	human		2011	PRESENT	PRESENT	PRESENT	PRESENT	PRESENT	PRESENT	PRESENT	PRESENT	PRESENT
ERR311483	Klebsiella pneumoniae	unknown	UK	ERR311483	Ellington et al.	human		2012	PRESENT	PRESENT	PRESENT	PRESENT	PRESENT	PRESENT	PRESENT	PRESENT	PRESENT
ERR311479	Klebsiella pneumoniae	unknown	UK	ERR311479	Ellington et al.	human			PRESENT	PRESENT	PRESENT	PRESENT	PRESENT	PRESENT	PRESENT	PRESENT	PRESENT
ERR311478	Klebsiella pneumoniae	unknown	UK	ERR311478	Ellington et al.	human			PRESENT	PRESENT	PRESENT	PRESENT	PRESENT	PRESENT	PRESENT	PRESENT	PRESENT
ERR311477	Klebsiella pneumoniae	unknown	UK	ERR311477	Ellington et al.	human			PRESENT	PRESENT	PRESENT	PRESENT	PRESENT	PRESENT	PRESENT	PRESENT	PRESENT
ERR311471	Klebsiella pneumoniae	unknown	UK	ERR311471	Ellington et al.	human		2012	PRESENT	PRESENT	PRESENT	PRESENT	PRESENT	PRESENT	PRESENT	PRESENT	PRESENT
ERR311470	Klebsiella pneumoniae	unknown	UK	ERR311470	Ellington et al.	human			PRESENT	PRESENT	PRESENT	PRESENT	PRESENT	PRESENT	PRESENT	PRESENT	PRESENT
ERR304799	Klebsiella pneumoniae	unknown	UK	ERR304799	Ellington et al.	human		2011	PRESENT	PRESENT	PRESENT	PRESENT	PRESENT	PRESENT	PRESENT	PRESENT	PRESENT
ERR304797	Klebsiella pneumoniae	unknown	UK	ERR304797	Ellington et al.	human		2011	PRESENT	PRESENT	PRESENT	PRESENT	PRESENT	PRESENT	PRESENT	PRESENT	PRESENT
ERR304794	Klebsiella pneumoniae	unknown	UK	ERR304794	Ellington et al.	human		2010	PRESENT	PRESENT	PRESENT	PRESENT	PRESENT	PRESENT	PRESENT	PRESENT	PRESENT
ERR304793	Klebsiella pneumoniae	unknown	UK	ERR304793	Ellington et al.	human		2010	PRESENT	PRESENT	PRESENT	PRESENT	PRESENT	PRESENT	PRESENT	PRESENT	PRESENT
ERR304792	Klebsiella pneumoniae	unknown	UK	ERR304792	Ellington et al.	human		2009	PRESENT	PRESENT	PRESENT	PRESENT	PRESENT	PRESENT	PRESENT	PRESENT	PRESENT
ERR304791	Klebsiella quasipneumoniae subsp. quasipneumoniae	unknown	UK	ERR304791	Ellington et al.	human		2008	PRESENT	PRESENT	PRESENT	PRESENT	PRESENT	PRESENT	PRESENT	PRESENT	PRESENT
ERR304790	Klebsiella pneumoniae	unknown	UK	ERR304790	Ellington et al.	human		2008	PRESENT	PRESENT	PRESENT	PRESENT	PRESENT	PRESENT	PRESENT	PRESENT	PRESENT
ERR304789	Klebsiella pneumoniae	unknown	UK	ERR304789	Ellington et al.	human		2007	PRESENT	PRESENT	PRESENT	PRESENT	PRESENT	PRESENT	PRESENT	PRESENT	PRESENT
ERR304788	Klebsiella pneumoniae	unknown	UK	ERR304788	Ellington et al.	human		2007	PRESENT	PRESENT	PRESENT	PRESENT	PRESENT	PRESENT	PRESENT	PRESENT	PRESENT
ERR279267	Klebsiella pneumoniae	M635		ERR279267	Wand et al.			1940	PRESENT	PRESENT	PRESENT	PRESENT	PRESENT	PRESENT	PRESENT	PRESENT	PRESENT
ERR279266	Klebsiella pneumoniae	M636		ERR279266	Wand et al.			1940	PRESENT	PRESENT	PRESENT	PRESENT	PRESENT	PRESENT	PRESENT	PRESENT	PRESENT
ERR279265	Klebsiella pneumoniae	M637		ERR279265	Wand et al.				PRESENT	PRESENT	PRESENT	PRESENT	PRESENT	PRESENT	PRESENT	PRESENT	PRESENT
ERR279255	Klebsiella pneumoniae	M665		ERR279255	Wand et al.			1935	PRESENT	PRESENT	PRESENT	PRESENT	PRESENT	PRESENT	PRESENT	PRESENT	PRESENT
ERR279244	Klebsiella pneumoniae	M404		ERR279244	Wand et al.			1940	PRESENT	PRESENT	PRESENT	PRESENT	PRESENT	PRESENT	STOPS	PRESENT	PRESENT
ERR279216	Klebsiella pneumoniae	M583		ERR279216	Wand et al.			1932	PRESENT	PRESENT	PRESENT	PRESENT	PRESENT	PRESENT	PRESENT	PRESENT	PRESENT
ERR279215	Klebsiella pneumoniae	M584		ERR279215	Wand et al.			1932	PRESENT	PRESENT	PRESENT	PRESENT	PRESENT	PRESENT	PRESENT	PRESENT	PRESENT
ERR279214	Klebsiella pneumoniae	M586		ERR279214	Wand et al.	human	infection	1940	PRESENT	PRESENT	PRESENT	PRESENT	PRESENT	PRESENT	PRESENT	PRESENT	PRESENT
ERR279213	Klebsiella pneumoniae	M587		ERR279213	Wand et al.			1947	PRESENT	PRESENT	PRESENT	PRESENT	PRESENT	PRESENT	PRESENT	PRESENT	PRESENT
ERR279212	Klebsiella pneumoniae	M588		ERR279212	Wand et al.			1947	PRESENT	PRESENT	PRESENT	PRESENT	PRESENT	PRESENT	PRESENT	PRESENT	PRESENT
ERR276989	Klebsiella pneumoniae	unknown	UK	ERR276989	Stoesser et al. 2013				PRESENT	PRESENT	PRESENT	PRESENT	PRESENT	PRESENT	PRESENT	PRESENT	PRESENT
ERR276988	Klebsiella pneumoniae	unknown	UK	ERR276988	Stoesser et al. 2013				PRESENT	PRESENT	PRESENT	PRESENT	PRESENT	PRESENT	PRESENT	PRESENT	PRESENT
ERR276987	Klebsiella pneumoniae	unknown	UK	ERR276987	Stoesser et al. 2013				PRESENT	PRESENT	PRESENT	PRESENT	PRESENT	PRESENT	PRESENT	PRESENT	PRESENT
ERR276986	Klebsiella pneumoniae	unknown	UK	ERR276986	Stoesser et al. 2013				PRESENT	PRESENT	PRESENT	PRESENT	PRESENT	PRESENT	PRESENT	PRESENT	PRESENT
ERR276985	Klebsiella pneumoniae	unknown	UK	ERR276985	Stoesser et al. 2013				PRESENT	PRESENT	PRESENT	PRESENT	PRESENT	PRESENT	PRESENT	PRESENT	PRESENT
ERR276984	Klebsiella pneumoniae	unknown	UK	ERR276984	Stoesser et al. 2013				PRESENT	PRESENT	PRESENT	PRESENT	PRESENT	PRESENT	PRESENT	PRESENT	PRESENT
ERR276983	Klebsiella pneumoniae	unknown	UK	ERR276983	Stoesser et al. 2013				PRESENT	PRESENT	PRESENT	PRESENT	PRESENT	PRESENT	PRESENT	PRESENT	PRESENT
ERR276982	Klebsiella pneumoniae	unknown	UK	ERR276982	Stoesser et al. 2013				PRESENT	PRESENT	PRESENT	PRESENT	PRESENT	PRESENT	PRESENT	PRESENT	PRESENT
ERR276981	Klebsiella pneumoniae	unknown	UK	ERR276981	Stoesser et al. 2013				PRESENT	PRESENT	PRESENT	PRESENT	PRESENT	PRESENT	PRESENT	PRESENT	PRESENT
ERR276980	Klebsiella pneumoniae	unknown	UK	ERR276980	Stoesser et al. 2013				PRESENT	PRESENT	PRESENT	PRESENT	PRESENT	PRESENT	PRESENT	PRESENT	PRESENT
ERR276979	Klebsiella pneumoniae	unknown	UK	ERR276979	Stoesser et al. 2013				PRESENT	PRESENT	PRESENT	PRESENT	PRESENT	PRESENT	PRESENT	PRESENT	PRESENT
ERR276978	Klebsiella pneumoniae	unknown	UK	ERR276978	Stoesser et al. 2013				PRESENT	PRESENT	PRESENT	PRESENT	PRESENT	PRESENT	PRESENT	PRESENT	PRESENT
ERR276977	Klebsiella pneumoniae	unknown	UK	ERR276977	Stoesser et al. 2013				PRESENT	PRESENT	PRESENT	PRESENT	PRESENT	PRESENT	PRESENT	PRESENT	PRESENT
ERR276976	Klebsiella variicola	unknown	UK	ERR276976	Stoesser et al. 2013				PRESENT	PRESENT	PRESENT	PRESENT	PRESENT	PRESENT	PRESENT	PRESENT	PRESENT
ERR276975	Klebsiella pneumoniae	unknown	UK	ERR276975	Stoesser et al. 2013				PRESENT	PRESENT	PRESENT	PRESENT	PRESENT	PRESENT	PRESENT	PRESENT	PRESENT
ERR276974	Klebsiella pneumoniae	unknown	UK	ERR276974	Stoesser et al. 2013				PRESENT	PRESENT	PRESENT	PRESENT	PRESENT	PRESENT	PRESENT	PRESENT	PRESENT
ERR276973	Klebsiella pneumoniae	unknown	UK	ERR276973	Stoesser et al. 2013				PRESENT	PRESENT	PRESENT	PRESENT	PRESENT	PRESENT	PRESENT	PRESENT	PRESENT
ERR276972	Klebsiella pneumoniae	unknown	UK	ERR276972	Stoesser et al. 2013				PRESENT	PRESENT	PRESENT	PRESENT	PRESENT	PRESENT	PRESENT	PRESENT	PRESENT
ERR276971	Klebsiella pneumoniae	unknown	UK	ERR276971	Stoesser et al. 2013				PRESENT	PRESENT	PRESENT	PRESENT	PRESENT	PRESENT	PRESENT	PRESENT	PRESENT
ERR276970	Klebsiella pneumoniae	unknown	UK	ERR276970	Stoesser et al. 2013				PRESENT	PRESENT	PRESENT	PRESENT	PRESENT	PRESENT	PRESENT	PRESENT	PRESENT
ERR276969	Klebsiella pneumoniae	unknown	UK	ERR276969	Stoesser et al. 2013				PRESENT	PRESENT	PRESENT	PRESENT	PRESENT	PRESENT	PRESENT	PRESENT	PRESENT
ERR276968	Klebsiella pneumoniae	unknown	UK	ERR276968	Stoesser et al. 2013				PRESENT	PRESENT	PRESENT	PRESENT	PRESENT	PRESENT	PRESENT	PRESENT	PRESENT
ERR276967	Klebsiella pneumoniae	unknown	UK	ERR276967	Stoesser et al. 2013				PRESENT	PRESENT	PRESENT	PRESENT	PRESENT	PRESENT	PRESENT	PRESENT	PRESENT
ERR276966	Klebsiella pneumoniae	unknown	UK	ERR276966	Stoesser et al. 2013				PRESENT	PRESENT	PRESENT	PRESENT	PRESENT	PRESENT	PRESENT	PRESENT	PRESENT
ERR276965	Klebsiella pneumoniae	unknown	UK	ERR276965	Stoesser et al. 2013				PRESENT	PRESENT	PRESENT	PRESENT	PRESENT	PRESENT	PRESENT	PRESENT	PRESENT
ERR276964	Klebsiella pneumoniae	unknown	UK	ERR276964	Stoesser et al. 2013				PRESENT	PRESENT	PRESENT	PRESENT	PRESENT	PRESENT	PRESENT	PRESENT	PRESENT
ERR276963	Klebsiella pneumoniae	unknown	UK	ERR276963	Stoesser et al. 2013				PRESENT	PRESENT	PRESENT	PRESENT	PRESENT	PRESENT	PRESENT	PRESENT	PRESENT
ERR276962	Klebsiella pneumoniae	unknown	UK	ERR276962	Stoesser et al. 2013				PRESENT	PRESENT	PRESENT	PRESENT	PRESENT	PRESENT	PRESENT	PRESENT	PRESENT
ERR276961	Klebsiella pneumoniae	unknown	UK	ERR276961	Stoesser et al. 2013				PRESENT	PRESENT	PRESENT	PRESENT	PRESENT	PRESENT	PRESENT	PRESENT	PRESENT
ERR276960	Klebsiella pneumoniae	unknown	UK	ERR276960	Stoesser et al. 2013				PRESENT	PRESENT	PRESENT	PRESENT	PRESENT	PRESENT	PRESENT	PRESENT	PRESENT
ERR276959	Klebsiella pneumoniae	unknown	UK	ERR276959	Stoesser et al. 2013				PRESENT	PRESENT	PRESENT	PRESENT	PRESENT	PRESENT	PRESENT	PRESENT	PRESENT
ERR276958	Klebsiella pneumoniae	unknown	UK	ERR276958	Stoesser et al. 2013				PRESENT	PRESENT	PRESENT	PRESENT	PRESENT	PRESENT	PRESENT	PRESENT	PRESENT
ERR276957	Klebsiella pneumoniae	unknown	UK	ERR276957	Stoesser et al. 2013				PRESENT	PRESENT	PRESENT	PRESENT	PRESENT	PRESENT	PRESENT	PRESENT	PRESENT
ERR276956	Klebsiella pneumoniae	unknown	UK	ERR276956	Stoesser et al. 2013				PRESENT	PRESENT	PRESENT	PRESENT	PRESENT	PRESENT	PRESENT	PRESENT	PRESENT
ERR276955	Klebsiella pneumoniae	unknown	UK	ERR276955	Stoesser et al. 2013				PRESENT	PRESENT	PRESENT	PRESENT	PRESENT	PRESENT	PRESENT	PRESENT	PRESENT
ERR276954	Klebsiella pneumoniae	unknown	UK	ERR276954	Stoesser et al. 2013				PRESENT	PRESENT	PRESENT	PRESENT	PRESENT	PRESENT	PRESENT	PRESENT	PRESENT
ERR276953	Klebsiella pneumoniae	unknown	UK	ERR276953	Stoesser et al. 2013				PRESENT	PRESENT	PRESENT	PRESENT	PRESENT	PRESENT	PRESENT	PRESENT	PRESENT
ERR276952	Klebsiella pneumoniae	unknown	UK	ERR276952	Stoesser et al. 2013				PRESENT	PRESENT	PRESENT	PRESENT	PRESENT	PRESENT	PRESENT	PRESENT	PRESENT
ERR276951	Klebsiella pneumoniae	unknown	UK	ERR276951	Stoesser et al. 2013				PRESENT	PRESENT	PRESENT	PRESENT	PRESENT	PRESENT	PRESENT	PRESENT	PRESENT
ERR276950	Klebsiella pneumoniae	unknown	UK	ERR276950	Stoesser et al. 2013				PRESENT	PRESENT	PRESENT	PRESENT	PRESENT	PRESENT	PRESENT	PRESENT	PRESENT
ERR276949	Klebsiella pneumoniae	unknown	UK	ERR276949	Stoesser et al. 2013				PRESENT	PRESENT	PRESENT	PRESENT	PRESENT	PRESENT	PRESENT	PRESENT	PRESENT
ERR276948	Klebsiella pneumoniae	unknown	UK	ERR276948	Stoesser et al. 2013				PRESENT	PRESENT	PRESENT	PRESENT	PRESENT	PRESENT	PRESENT	PRESENT	PRESENT
ERR276947	Klebsiella pneumoniae	unknown	UK	ERR276947	Stoesser et al. 2013				PRESENT	PRESENT	PRESENT	PRESENT	PRESENT	PRESENT	PRESENT	PRESENT	PRESENT
ERR276946	Klebsiella pneumoniae	unknown	UK	ERR276946	Stoesser et al. 2013				PRESENT	PRESENT	PRESENT	PRESENT	PRESENT	PRESENT	PRESENT	PRESENT	PRESENT
ERR276945	Klebsiella pneumoniae	unknown	UK	ERR276945	Stoesser et al. 2013				PRESENT	PRESENT	PRESENT	PRESENT	PRESENT	PRESENT	PRESENT	PRESENT	PRESENT
ERR276944	Klebsiella pneumoniae	unknown	UK	ERR276944	Stoesser et al. 2013				PRESENT	PRESENT	PRESENT	PRESENT	PRESENT	PRESENT	PRESENT	PRESENT	PRESENT
ERR276943	Klebsiella pneumoniae	unknown	UK	ERR276943	Stoesser et al. 2013				PRESENT	PRESENT	PRESENT	PRESENT	PRESENT	PRESENT	PRESENT	PRESENT	PRESENT
ERR276942	Klebsiella pneumoniae	unknown	UK	ERR276942	Stoesser et al. 2013				PRESENT	PRESENT	PRESENT	PRESENT	PRESENT	PRESENT	PRESENT	PRESENT	PRESENT
ERR276941	Klebsiella variicola	unknown	UK	ERR276941	Stoesser et al. 2013				PRESENT	PRESENT	PRESENT	PRESENT	PRESENT	PRESENT	PRESENT	PRESENT	PRESENT
ERR276940	Klebsiella pneumoniae	unknown	UK	ERR276940	Stoesser et al. 2013				PRESENT	PRESENT	PRESENT	PRESENT	PRESENT	PRESENT	PRESENT	PRESENT	PRESENT
ERR276939	Klebsiella pneumoniae	unknown	UK	ERR276939	Stoesser et al. 2013				PRESENT	PRESENT	PRESENT	PRESENT	PRESENT	PRESENT	PRESENT	PRESENT	PRESENT
ERR276938	Klebsiella pneumoniae	unknown	UK	ERR276938	Stoesser et al. 2013				PRESENT	PRESENT	PRESENT	PRESENT	PRESENT	PRESENT	PRESENT	PRESENT	PRESENT
ERR276937	Klebsiella pneumoniae	unknown	UK	ERR276937	Stoesser et al. 2013				PRESENT	PRESENT	PRESENT	PRESENT	PRESENT	PRESENT	PRESENT	PRESENT	PRESENT
ERR276936	Klebsiella pneumoniae	unknown	UK	ERR276936	Stoesser et al. 2013				PRESENT	PRESENT	PRESENT	PRESENT	PRESENT	PRESENT	PRESENT	PRESENT	PRESENT
ERR276935	Klebsiella quasipneumoniae subsp. similipneumoniae	unknown	UK	ERR276935	Stoesser et al. 2013				PRESENT	PRESENT	PRESENT	PRESENT	PRESENT	PRESENT	PRESENT	PRESENT	PRESENT
ERR276934	Klebsiella pneumoniae	unknown	UK	ERR276934	Stoesser et al. 2013				PRESENT	PRESENT	PRESENT	PRESENT	PRESENT	PRESENT	PRESENT	PRESENT	PRESENT
ERR276933	Klebsiella variicola	unknown	UK	ERR276933	Stoesser et al. 2013				PRESENT	PRESENT	PRESENT	PRESENT	PRESENT	PRESENT	PRESENT	PRESENT	PRESENT
ERR276932	Klebsiella pneumoniae	unknown	UK	ERR276932	Stoesser et al. 2013				PRESENT	PRESENT	PRESENT	PRESENT	PRESENT	PRESENT	PRESENT	PRESENT	PRESENT
ERR276931	Klebsiella variicola	unknown	UK	ERR276931	Stoesser et al. 2013				PRESENT	PRESENT	PRESENT	PRESENT	PRESENT	PRESENT	PRESENT	PRESENT	PRESENT
ERR276930	Klebsiella pneumoniae	unknown	UK	ERR276930	Stoesser et al. 2013				PRESENT	PRESENT	PRESENT	PRESENT	PRESENT	PRESENT	PRESENT	PRESENT	PRESENT
ERR276929	Klebsiella pneumoniae	unknown	UK	ERR276929	Stoesser et al. 2013				PRESENT	PRESENT	PRESENT	PRESENT	PRESENT	PRESENT	PRESENT	PRESENT	PRESENT
ERR276928	Klebsiella variicola	unknown	UK	ERR276928	Stoesser et al. 2013				PRESENT	PRESENT	PRESENT	PRESENT	PRESENT	PRESENT	PRESENT	PRESENT	PRESENT
ERR276927	Klebsiella pneumoniae	unknown	UK	ERR276927	Stoesser et al. 2013				PRESENT	PRESENT	PRESENT	PRESENT	PRESENT	PRESENT	PRESENT	PRESENT	PRESENT
ERR276926	Klebsiella pneumoniae	unknown	UK	ERR276926	Stoesser et al. 2013				PRESENT	PRESENT	PRESENT	PRESENT	PRESENT	PRESENT	PRESENT	PRESENT	PRESENT
ERR276925	Klebsiella pneumoniae	unknown	UK	ERR276925	Stoesser et al. 2013				PRESENT	PRESENT	PRESENT	PRESENT	PRESENT	PRESENT	PRESENT	PRESENT	PRESENT
ERR276924	Klebsiella variicola	unknown	UK	ERR276924	Stoesser et al. 2013				PRESENT	PRESENT	PRESENT	PRESENT	PRESENT	PRESENT	PRESENT	PRESENT	PRESENT
ERR276923	Klebsiella pneumoniae	unknown	UK	ERR276923	Stoesser et al. 2013				PRESENT	PRESENT	PRESENT	PRESENT	PRESENT	PRESENT	PRESENT	PRESENT	PRESENT
ERR276922	Klebsiella pneumoniae	unknown	UK	ERR276922	Stoesser et al. 2013				PRESENT	PRESENT	PRESENT	PRESENT	PRESENT	PRESENT	PRESENT	PRESENT	PRESENT
ERR276921	Klebsiella pneumoniae	unknown	UK	ERR276921	Stoesser et al. 2013				PRESENT	PRESENT	PRESENT	PRESENT	PRESENT	PRESENT	PRESENT	PRESENT	PRESENT
ERR257692	Klebsiella pneumoniae	unknown	UK	ERR257692	Ellington et al.	human			PRESENT	PRESENT	PRESENT	PRESENT	PRESENT	PRESENT	PRESENT	PRESENT	PRESENT
ERR257691	Klebsiella pneumoniae	unknown	UK	ERR257691	Ellington et al.	human		2010	PRESENT	PRESENT	PRESENT	PRESENT	PRESENT	PRESENT	PRESENT	PRESENT	PRESENT
ERR257690	Klebsiella pneumoniae	unknown	UK	ERR257690	Ellington et al.	human		2009	PRESENT	PRESENT	PRESENT	PRESENT	PRESENT	PRESENT	PRESENT	PRESENT	PRESENT
ERR257689	Klebsiella quasipneumoniae subsp. similipneumoniae	unknown	UK	ERR257689	Ellington et al.	human		2008	PRESENT	PRESENT	PRESENT	PRESENT	PRESENT	PRESENT	PRESENT	PRESENT	PRESENT
ERR257688	Klebsiella pneumoniae	unknown	UK	ERR257688	Ellington et al.	human			PRESENT	PRESENT	PRESENT	PRESENT	PRESENT	PRESENT	PRESENT	PRESENT	PRESENT
ERR257687	Klebsiella quasivariicola	unknown	UK	ERR257687	Ellington et al.	human		2006	PRESENT	PRESENT	PRESENT	PRESENT	PRESENT	PRESENT	PRESENT	PRESENT	PRESENT
ERR257686	Klebsiella pneumoniae	unknown	UK	ERR257686	Ellington et al.	human		2006	PRESENT	PRESENT	PRESENT	PRESENT	PRESENT	PRESENT	PRESENT	PRESENT	PRESENT
ERR257685	Klebsiella pneumoniae	unknown	UK	ERR257685	Ellington et al.	human		2011	PRESENT	PRESENT	PRESENT	PRESENT	PRESENT	PRESENT	PRESENT	PRESENT	PRESENT
ERR257684	Klebsiella pneumoniae	unknown	UK	ERR257684	Ellington et al.	human		2011	PRESENT	PRESENT	PRESENT	PRESENT	PRESENT	PRESENT	PRESENT	PRESENT	PRESENT
ERR257683	Klebsiella pneumoniae	unknown	UK	ERR257683	Ellington et al.	human		2010	PRESENT	PRESENT	PRESENT	PRESENT	PRESENT	PRESENT	PRESENT	PRESENT	PRESENT
ERR257682	Klebsiella pneumoniae	unknown	UK	ERR257682	Ellington et al.	human		2009	PRESENT	PRESENT	PRESENT	PRESENT	PRESENT	PRESENT	PRESENT	PRESENT	PRESENT
ERR257681	Klebsiella pneumoniae	unknown	UK	ERR257681	Ellington et al.	human		2008	PRESENT	PRESENT	PRESENT	PRESENT	PRESENT	PRESENT	PRESENT	PRESENT	PRESENT
ERR257680	Klebsiella pneumoniae	unknown	UK	ERR257680	Ellington et al.	human			PRESENT	PRESENT	PRESENT	PRESENT	PRESENT	PRESENT	PRESENT	PRESENT	PRESENT
ERR257679	Klebsiella pneumoniae	unknown	UK	ERR257679	Ellington et al.	human		2006	PRESENT	PRESENT	PRESENT	PRESENT	PRESENT	PRESENT	PRESENT	PRESENT	PRESENT
ERR257678	Klebsiella pneumoniae	unknown	UK	ERR257678	Ellington et al.	human		2006	PRESENT	PRESENT	PRESENT	PRESENT	PRESENT	PRESENT	PRESENT	PRESENT	PRESENT
ERR257677	Klebsiella pneumoniae	unknown	UK	ERR257677	Ellington et al.	human		2011	PRESENT	PRESENT	PRESENT	PRESENT	PRESENT	PRESENT	PRESENT	PRESENT	PRESENT
ERR257676	Klebsiella pneumoniae	unknown	UK	ERR257676	Ellington et al.	human		2011	PRESENT	PRESENT	PRESENT	PRESENT	PRESENT	PRESENT	PRESENT	PRESENT	PRESENT
ERR257675	Klebsiella pneumoniae	unknown	UK	ERR257675	Ellington et al.	human		2010	PRESENT	PRESENT	PRESENT	PRESENT	PRESENT	PRESENT	PRESENT	PRESENT	PRESENT
ERR257674	Klebsiella pneumoniae	unknown	UK	ERR257674	Ellington et al.	human		2009	PRESENT	PRESENT	PRESENT	PRESENT	PRESENT	PRESENT	PRESENT	PRESENT	PRESENT
ERR257673	Klebsiella pneumoniae	unknown	UK	ERR257673	Ellington et al.	human		2008	PRESENT	PRESENT	PRESENT	PRESENT	PRESENT	PRESENT	PRESENT	PRESENT	PRESENT
ERR257672	Klebsiella pneumoniae	unknown	UK	ERR257672	Ellington et al.	human		2007	PRESENT	PRESENT	PRESENT	PRESENT	PRESENT	PRESENT	PRESENT	PRESENT	PRESENT
ERR257671	Klebsiella pneumoniae	unknown	UK	ERR257671	Ellington et al.	human		2006	PRESENT	PRESENT	PRESENT	PRESENT	PRESENT	PRESENT	PRESENT	PRESENT	PRESENT
ERR257670	Klebsiella pneumoniae	unknown	UK	ERR257670	Ellington et al.	human		2006	PRESENT	PRESENT	PRESENT	PRESENT	PRESENT	PRESENT	PRESENT	PRESENT	PRESENT
ERR257669	Klebsiella pneumoniae	unknown	UK	ERR257669	Ellington et al.	human		2011	PRESENT	PRESENT	PRESENT	PRESENT	PRESENT	PRESENT	PRESENT	PRESENT	PRESENT
ERR257668	Klebsiella pneumoniae	unknown	UK	ERR257668	Ellington et al.	human		2011	PRESENT	PRESENT	PRESENT	PRESENT	PRESENT	PRESENT	PRESENT	PRESENT	PRESENT
ERR257667	Klebsiella pneumoniae	unknown	UK	ERR257667	Ellington et al.	human			PRESENT	PRESENT	PRESENT	PRESENT	PRESENT	PRESENT	PRESENT	PRESENT	PRESENT
ERR257666	Klebsiella pneumoniae	unknown	UK	ERR257666	Ellington et al.	human		2009	PRESENT	PRESENT	PRESENT	PRESENT	PRESENT	PRESENT	PRESENT	PRESENT	PRESENT
ERR257665	Klebsiella pneumoniae	unknown	UK	ERR257665	Ellington et al.	human		2008	PRESENT	PRESENT	PRESENT	PRESENT	PRESENT	PRESENT	PRESENT	PRESENT	PRESENT
ERR257664	Klebsiella pneumoniae	unknown	UK	ERR257664	Ellington et al.	human		2007	PRESENT	PRESENT	PRESENT	PRESENT	PRESENT	PRESENT	PRESENT	PRESENT	PRESENT
ERR257663	Klebsiella pneumoniae	unknown	UK	ERR257663	Ellington et al.	human		2011	PRESENT	PRESENT	PRESENT	PRESENT	PRESENT	PRESENT	PRESENT	PRESENT	PRESENT
ERR257662	Klebsiella pneumoniae	unknown	UK	ERR257662	Ellington et al.	human		2006	PRESENT	PRESENT	PRESENT	PRESENT	PRESENT	PRESENT	PRESENT	PRESENT	PRESENT
ERR257661	Klebsiella pneumoniae	unknown	UK	ERR257661	Ellington et al.	human		2011	PRESENT	PRESENT	PRESENT	PRESENT	PRESENT	PRESENT	PRESENT	PRESENT	PRESENT
ERR257660	Klebsiella pneumoniae	unknown	UK	ERR257660	Ellington et al.	human		2011	PRESENT	PRESENT	PRESENT	PRESENT	PRESENT	PRESENT	PRESENT	PRESENT	PRESENT
ERR257658	Klebsiella pneumoniae	unknown	UK	ERR257658	Ellington et al.	human		2009	PRESENT	PRESENT	PRESENT	PRESENT	PRESENT	PRESENT	PRESENT	PRESENT	PRESENT
ERR257657	Klebsiella pneumoniae	unknown	UK	ERR257657	Ellington et al.	human		2008	PRESENT	PRESENT	PRESENT	PRESENT	PRESENT	PRESENT	PRESENT	PRESENT	PRESENT
ERR257656	Klebsiella pneumoniae	unknown	UK	ERR257656	Ellington et al.	human		2006	PRESENT	PRESENT	PRESENT	PRESENT	PRESENT	PRESENT	PRESENT	PRESENT	PRESENT
ERR257655	Klebsiella pneumoniae	unknown	UK	ERR257655	Ellington et al.	human			PRESENT	PRESENT	PRESENT	PRESENT	PRESENT	PRESENT	PRESENT	PRESENT	PRESENT
ERR257654	Klebsiella pneumoniae	unknown	UK	ERR257654	Ellington et al.	human		2006	PRESENT	PRESENT	PRESENT	PRESENT	PRESENT	PRESENT	PRESENT	PRESENT	PRESENT
ERR257653	Klebsiella pneumoniae	unknown	UK	ERR257653	Ellington et al.	human		2011	PRESENT	PRESENT	PRESENT	PRESENT	PRESENT	PRESENT	PRESENT	PRESENT	PRESENT
ERR257652	Klebsiella pneumoniae	unknown	UK	ERR257652	Ellington et al.	human		2011	PRESENT	PRESENT	PRESENT	PRESENT	PRESENT	PRESENT	PRESENT	PRESENT	PRESENT
ERR257651	Klebsiella pneumoniae	unknown	UK	ERR257651	Ellington et al.	human		2010	PRESENT	PRESENT	PRESENT	PRESENT	PRESENT	PRESENT	PRESENT	PRESENT	PRESENT
ERR257650	Klebsiella quasipneumoniae subsp. similipneumoniae	unknown	UK	ERR257650	Ellington et al.	human		2009	PRESENT	PRESENT	PRESENT	PRESENT	PRESENT	PRESENT	PRESENT	PRESENT	PRESENT
ERR257649	Klebsiella pneumoniae	unknown	UK	ERR257649	Ellington et al.	human			PRESENT	PRESENT	PRESENT	PRESENT	PRESENT	PRESENT	PRESENT	PRESENT	PRESENT
ERR257648	Klebsiella pneumoniae	unknown	UK	ERR257648	Ellington et al.	human		2011	PRESENT	PRESENT	PRESENT	PRESENT	PRESENT	PRESENT	PRESENT	PRESENT	PRESENT
ERR257647	Klebsiella pneumoniae	unknown	UK	ERR257647	Ellington et al.	human		2006	PRESENT	PRESENT	PRESENT	PRESENT	PRESENT	PRESENT	PRESENT	PRESENT	PRESENT
ERR257646	Klebsiella pneumoniae	unknown	UK	ERR257646	Ellington et al.	human		2006	PRESENT	PRESENT	PRESENT	PRESENT	PRESENT	PRESENT	PRESENT	PRESENT	PRESENT
ERR257645	Klebsiella pneumoniae	unknown	UK	ERR257645	Ellington et al.	human		2011	PRESENT	PRESENT	PRESENT	PRESENT	PRESENT	PRESENT	PRESENT	PRESENT	PRESENT
ERR257644	Klebsiella pneumoniae	unknown	UK	ERR257644	Ellington et al.	human		2010	PRESENT	PRESENT	PRESENT	PRESENT	PRESENT	PRESENT	PRESENT	PRESENT	PRESENT
ERR257643	Klebsiella quasipneumoniae subsp. similipneumoniae	unknown	UK	ERR257643	Ellington et al.	human		2010	PRESENT	PRESENT	PRESENT	PRESENT	PRESENT	PRESENT	PRESENT	PRESENT	PRESENT
ERR257642	Klebsiella pneumoniae	unknown	UK	ERR257642	Ellington et al.	human		2009	PRESENT	PRESENT	PRESENT	PRESENT	PRESENT	PRESENT	PRESENT	PRESENT	PRESENT
ERR257641	Klebsiella pneumoniae	unknown	UK	ERR257641	Ellington et al.	human		2007	PRESENT	PRESENT	PRESENT	PRESENT	PRESENT	PRESENT	PRESENT	PRESENT	PRESENT
ERR257640	Klebsiella pneumoniae	unknown	UK	ERR257640	Ellington et al.	human		2006	PRESENT	PRESENT	PRESENT	PRESENT	PRESENT	PRESENT	PRESENT	PRESENT	PRESENT
ERR257639	Klebsiella pneumoniae	unknown	UK	ERR257639	Ellington et al.	human		2006	PRESENT	PRESENT	PRESENT	PRESENT	PRESENT	PRESENT	PRESENT	PRESENT	PRESENT
ERR257638	Klebsiella pneumoniae	unknown	UK	ERR257638	Ellington et al.	human		2006	PRESENT	PRESENT	PRESENT	PRESENT	PRESENT	PRESENT	PRESENT	PRESENT	PRESENT
ERR257637	Klebsiella pneumoniae	unknown	UK	ERR257637	Ellington et al.	human			PRESENT	PRESENT	PRESENT	PRESENT	PRESENT	PRESENT	PRESENT	PRESENT	PRESENT
ERR257636	Klebsiella pneumoniae	unknown	UK	ERR257636	Ellington et al.	human		2010	PRESENT	PRESENT	PRESENT	PRESENT	PRESENT	PRESENT	PRESENT	PRESENT	PRESENT
ERR257635	Klebsiella quasipneumoniae subsp. similipneumoniae	unknown	UK	ERR257635	Ellington et al.	human		2010	PRESENT	PRESENT	PRESENT	PRESENT	PRESENT	PRESENT	PRESENT	PRESENT	PRESENT
ERR257634	Klebsiella pneumoniae	unknown	UK	ERR257634	Ellington et al.	human		2009	PRESENT	PRESENT	PRESENT	PRESENT	PRESENT	PRESENT	PRESENT	PRESENT	PRESENT
ERR257633	Klebsiella pneumoniae	unknown	UK	ERR257633	Ellington et al.	human		2007	PRESENT	PRESENT	PRESENT	PRESENT	PRESENT	PRESENT	PRESENT	PRESENT	PRESENT
ERR257632	Klebsiella pneumoniae	unknown	UK	ERR257632	Ellington et al.	human		2006	PRESENT	PRESENT	PRESENT	PRESENT	PRESENT	PRESENT	PRESENT	PRESENT	PRESENT
ERR257631	Klebsiella pneumoniae	unknown	UK	ERR257631	Ellington et al.	human		2006	PRESENT	PRESENT	PRESENT	PRESENT	PRESENT	PRESENT	PRESENT	PRESENT	PRESENT
ERR257630	Klebsiella pneumoniae	unknown	UK	ERR257630	Ellington et al.	human		2006	PRESENT	PRESENT	PRESENT	PRESENT	PRESENT	PRESENT	PRESENT	PRESENT	PRESENT
ERR257629	Klebsiella pneumoniae	unknown	UK	ERR257629	Ellington et al.	human		2011	PRESENT	PRESENT	PRESENT	PRESENT	PRESENT	PRESENT	PRESENT	PRESENT	PRESENT
ERR257628	Klebsiella pneumoniae	unknown	UK	ERR257628	Ellington et al.	human		2010	PRESENT	PRESENT	PRESENT	PRESENT	PRESENT	PRESENT	PRESENT	PRESENT	PRESENT
ERR257627	Klebsiella pneumoniae	unknown	UK	ERR257627	Ellington et al.	human		2010	PRESENT	PRESENT	PRESENT	PRESENT	PRESENT	PRESENT	PRESENT	PRESENT	PRESENT
ERR257626	Klebsiella pneumoniae	unknown	UK	ERR257626	Ellington et al.	human			PRESENT	PRESENT	PRESENT	PRESENT	PRESENT	PRESENT	PRESENT	PRESENT	PRESENT
ERR257625	Klebsiella pneumoniae	unknown	UK	ERR257625	Ellington et al.	human		2007	PRESENT	PRESENT	PRESENT	PRESENT	PRESENT	PRESENT	PRESENT	PRESENT	PRESENT
ERR257624	Klebsiella pneumoniae	unknown	UK	ERR257624	Ellington et al.	human		2006	PRESENT	PRESENT	PRESENT	PRESENT	PRESENT	PRESENT	PRESENT	PRESENT	PRESENT
ERR257623	Klebsiella pneumoniae	unknown	UK	ERR257623	Ellington et al.	human		2006	PRESENT	PRESENT	PRESENT	PRESENT	PRESENT	PRESENT	PRESENT	PRESENT	PRESENT
ERR257622	Klebsiella pneumoniae	unknown	UK	ERR257622	Ellington et al.	human		2006	PRESENT	PRESENT	PRESENT	PRESENT	PRESENT	PRESENT	PRESENT	PRESENT	PRESENT
ERR257621	Klebsiella pneumoniae	unknown	UK	ERR257621	Ellington et al.	human		2011	PRESENT	PRESENT	PRESENT	PRESENT	PRESENT	PRESENT	PRESENT	PRESENT	PRESENT
ERR257620	Klebsiella pneumoniae	unknown	UK	ERR257620	Ellington et al.	human		2010	PRESENT	PRESENT	PRESENT	PRESENT	PRESENT	PRESENT	PRESENT	PRESENT	PRESENT
ERR257619	Klebsiella quasipneumoniae subsp. similipneumoniae	unknown	UK	ERR257619	Ellington et al.	human		2009	PRESENT	PRESENT	PRESENT	PRESENT	PRESENT	PRESENT	PRESENT	PRESENT	PRESENT
ERR257618	Klebsiella pneumoniae	unknown	UK	ERR257618	Ellington et al.	human		2008	PRESENT	PRESENT	PRESENT	PRESENT	PRESENT	PRESENT	PRESENT	PRESENT	PRESENT
ERR257617	Klebsiella pneumoniae	unknown	UK	ERR257617	Ellington et al.	human		2007	PRESENT	PRESENT	PRESENT	PRESENT	PRESENT	PRESENT	PRESENT	PRESENT	PRESENT
ERR257616	Klebsiella variicola	unknown	UK	ERR257616	Ellington et al.	human		2006	PRESENT	PRESENT	PRESENT	PRESENT	PRESENT	PRESENT	PRESENT	PRESENT	PRESENT
ERR257615	Klebsiella variicola	unknown	UK	ERR257615	Ellington et al.	human		2006	PRESENT	PRESENT	PRESENT	PRESENT	PRESENT	PRESENT	PRESENT	PRESENT	PRESENT
ERR257614	Klebsiella pneumoniae	unknown	UK	ERR257614	Ellington et al.	human		2006	PRESENT	PRESENT	PRESENT	PRESENT	PRESENT	PRESENT	PRESENT	PRESENT	PRESENT
ERR257612	Klebsiella pneumoniae	unknown	UK	ERR257612	Ellington et al.	human		2010	PRESENT	PRESENT	PRESENT	PRESENT	PRESENT	PRESENT	PRESENT	PRESENT	PRESENT
ERR257611	Klebsiella pneumoniae	unknown	UK	ERR257611	Ellington et al.	human		2009	PRESENT	PRESENT	PRESENT	PRESENT	PRESENT	PRESENT	PRESENT	PRESENT	PRESENT
ERR257610	Klebsiella pneumoniae	unknown	UK	ERR257610	Ellington et al.	human		2008	PRESENT	PRESENT	PRESENT	PRESENT	PRESENT	PRESENT	PRESENT	PRESENT	PRESENT
ERR257609	Klebsiella pneumoniae	unknown	UK	ERR257609	Ellington et al.	human		2007	PRESENT	PRESENT	PRESENT	PRESENT	PRESENT	PRESENT	PRESENT	PRESENT	PRESENT
ERR257608	Klebsiella pneumoniae	unknown	UK	ERR257608	Ellington et al.	human		2006	PRESENT	PRESENT	PRESENT	PRESENT	PRESENT	PRESENT	PRESENT	PRESENT	PRESENT
ERR257607	Klebsiella pneumoniae	unknown	UK	ERR257607	Ellington et al.	human		2006	PRESENT	PRESENT	PRESENT	PRESENT	PRESENT	PRESENT	PRESENT	PRESENT	PRESENT
ERR257606	Klebsiella pneumoniae	unknown	UK	ERR257606	Ellington et al.	human		2006	PRESENT	PRESENT	PRESENT	PRESENT	PRESENT	PRESENT	PRESENT	PRESENT	PRESENT
ERR257605	Klebsiella pneumoniae	unknown	UK	ERR257605	Ellington et al.	human			PRESENT	PRESENT	PRESENT	PRESENT	PRESENT	PRESENT	PRESENT	PRESENT	PRESENT
ERR257604	Klebsiella pneumoniae	unknown	UK	ERR257604	Ellington et al.	human		2010	PRESENT	PRESENT	PRESENT	PRESENT	PRESENT	PRESENT	PRESENT	PRESENT	PRESENT
ERR257603	Klebsiella pneumoniae	unknown	UK	ERR257603	Ellington et al.	human		2009	PRESENT	PRESENT	PRESENT	PRESENT	PRESENT	PRESENT	PRESENT	PRESENT	PRESENT
ERR257602	Klebsiella pneumoniae	unknown	UK	ERR257602	Ellington et al.	human		2008	PRESENT	PRESENT	PRESENT	PRESENT	PRESENT	PRESENT	PRESENT	PRESENT	PRESENT
ERR257601	Klebsiella pneumoniae	unknown	UK	ERR257601	Ellington et al.	human		2007	PRESENT	PRESENT	PRESENT	PRESENT	PRESENT	PRESENT	PRESENT	PRESENT	PRESENT
ERR257600	Klebsiella pneumoniae	unknown	UK	ERR257600	Ellington et al.	human		2006	PRESENT	PRESENT	PRESENT	PRESENT	PRESENT	PRESENT	PRESENT	PRESENT	PRESENT
ERR257599	Klebsiella pneumoniae	unknown	UK	ERR257599	Ellington et al.	human		2006	PRESENT	PRESENT	PRESENT	PRESENT	PRESENT	PRESENT	PRESENT	PRESENT	PRESENT
ERR257598	Klebsiella pneumoniae	unknown	UK	ERR257598	Ellington et al.	human		2006	PRESENT	PRESENT	PRESENT	PRESENT	PRESENT	PRESENT	PRESENT	PRESENT	PRESENT
ERR230443	Klebsiella pneumoniae	M176		ERR230443	Wand et al.			1935	PRESENT	PRESENT	PRESENT	PRESENT	PRESENT	PRESENT	PRESENT	PRESENT	PRESENT
ERR230441	Klebsiella pneumoniae	M124		ERR230441	Wand et al.			1940	PRESENT	PRESENT	PRESENT	PRESENT	PRESENT	PRESENT	PRESENT	PRESENT	PRESENT
ERR230435	Klebsiella pneumoniae	M175A		ERR230435	Wand et al.			1941	PRESENT	PRESENT	PRESENT	PRESENT	PRESENT	PRESENT	PRESENT	PRESENT	PRESENT
ERR230425	Klebsiella pneumoniae	M109		ERR230425	Wand et al.			1932	PRESENT	PRESENT	PRESENT	PRESENT	PRESENT	PRESENT	PRESENT	PRESENT	PRESENT
ERR230408	Klebsiella pneumoniae	M70		ERR230408	Wand et al.	human	infection	1940	PRESENT	PRESENT	PRESENT	PRESENT	PRESENT	PRESENT	PRESENT	PRESENT	PRESENT
ERR230407	Klebsiella pneumoniae	M45		ERR230407	Wand et al.			1940	PRESENT	PRESENT	PRESENT	PRESENT	PRESENT	PRESENT	PRESENT	PRESENT	PRESENT
ERR230400	Klebsiella pneumoniae	M69		ERR230400	Wand et al.			1940	PRESENT	PRESENT	PRESENT	PRESENT	PRESENT	PRESENT	PRESENT	PRESENT	PRESENT
ERR230399	Klebsiella pneumoniae	M44		ERR230399	Wand et al.			1937	PRESENT	PRESENT	PRESENT	PRESENT	PRESENT	PRESENT	PRESENT	PRESENT	PRESENT
ERR230391	Klebsiella pneumoniae	M43		ERR230391	Wand et al.			1940	PRESENT	PRESENT	PRESENT	PRESENT	PRESENT	PRESENT	PRESENT	PRESENT	PRESENT
ERR230383	Klebsiella pneumoniae	M42		ERR230383	Wand et al.			1935	PRESENT	PRESENT	PRESENT	PRESENT	PRESENT	PRESENT	PRESENT	PRESENT	PRESENT
ERR204293	Klebsiella pneumoniae	M295		ERR204293	Wand et al.			1940	PRESENT	PRESENT	PRESENT	PRESENT	PRESENT	PRESENT	PRESENT	PRESENT	PRESENT
ERR204292	Klebsiella pneumoniae	M19		ERR204292	Wand et al.				PRESENT	PRESENT	PRESENT	PRESENT	PRESENT	PRESENT	PRESENT	PRESENT	PRESENT
DMG1700368	Klebsiella pneumoniae	FK1934	China	GCA_022016995.1		Human	infection	2013	PRESENT	PRESENT	PRESENT	PRESENT	PRESENT	PRESENT	PRESENT	PRESENT	PRESENT
DMG1700367	Klebsiella quasipneumoniae subsp. similipneumoniae	FK688	China	GCA_022016955.1		Human	infection	2013	PRESENT	PRESENT	PRESENT	PRESENT	PRESENT	PRESENT	PRESENT	PRESENT	PRESENT
AUSMDU00003509_S75_	Klebsiella pneumoniae	INF339	Australia	SRR5082465	wyres et al. 2016	human	infection	2014	PRESENT	PRESENT	PRESENT	PRESENT	PRESENT	PRESENT	PRESENT	PRESENT	PRESENT
AUSMDU00003508_S65_	Klebsiella pneumoniae	INF333	Australia	SRR5082463	wyres et al. 2016	human	infection	2014	PRESENT	PRESENT	PRESENT	PRESENT	PRESENT	PRESENT	PRESENT	PRESENT	PRESENT
AUSMDU00003507_S55_	Klebsiella pneumoniae	INF326	Australia	SRR5082453	wyres et al. 2016	human	infection	2014	PRESENT	PRESENT	PRESENT	PRESENT	PRESENT	PRESENT	PRESENT	PRESENT	PRESENT
AUSMDU00003506_S45_	Klebsiella variicola	INF312	Australia	SRR5082449	wyres et al. 2016	human	infection	2014	PRESENT	PRESENT	PRESENT	PRESENT	PRESENT	PRESENT	PRESENT	PRESENT	PRESENT
AUSMDU00003505_S35_	Klebsiella pneumoniae	INF311	Australia	SRR5082461	wyres et al. 2016	human	infection	2014	PRESENT	PRESENT	PRESENT	PRESENT	PRESENT	PRESENT	PRESENT	PRESENT	PRESENT
AUSMDU00003503_S16_	Klebsiella pneumoniae	INF298	Australia	SRR5082469	wyres et al. 2016	human	infection	2014	PRESENT	PRESENT	PRESENT	PRESENT	PRESENT	PRESENT	PRESENT	PRESENT	PRESENT
AUSMDU00003502_S14_	Klebsiella pneumoniae	INF293	Australia	SRR5082445	wyres et al. 2016	human	infection	2014	PRESENT	PRESENT	PRESENT	PRESENT	PRESENT	PRESENT	PRESENT	PRESENT	PRESENT
AUSMDU00003501_S12_	Klebsiella pneumoniae	INF277	Australia	SRR5082454	wyres et al. 2016	human	infection	2014	PRESENT	PRESENT	PRESENT	PRESENT	PRESENT	PRESENT	PRESENT	PRESENT	PRESENT
AUSMDU00003500_S10_	Klebsiella pneumoniae	INF275	Australia	SRR5082447	wyres et al. 2016	human	infection	2014	PRESENT	PRESENT	PRESENT	PRESENT	PRESENT	PRESENT	PRESENT	PRESENT	PRESENT
AUSMDU00003497_S4_	Klebsiella variicola	INF244	Australia	SRR5082455	wyres et al. 2016	human	infection	2013	PRESENT	PRESENT	PRESENT	PRESENT	PRESENT	PRESENT	PRESENT	PRESENT	PRESENT
AUSMDU00003494_S13_	Klebsiella pneumoniae	INF143	Australia	SRR5082458	wyres et al. 2016	human	infection	2013	PRESENT	PRESENT	PRESENT	PRESENT	PRESENT	PRESENT	PRESENT	PRESENT	PRESENT
AUSMDU00003493_S11_	Klebsiella pneumoniae	INF061	Australia	SRR5082459	wyres et al. 2016	human	infection	2013	PRESENT	PRESENT	PRESENT	PRESENT	PRESENT	PRESENT	PRESENT	PRESENT	PRESENT
AUSMDU00003488_S1_	Klebsiella pneumoniae	KSB1_10I	Australia	SRR5082450	wyres et al. 2016	human	carriage	2014	PRESENT	PRESENT	PRESENT	PRESENT	PRESENT	PRESENT	PRESENT	PRESENT	PRESENT
AUSMDU00003486_S10_	Klebsiella pneumoniae	INF346	Australia	SRR5082488	wyres et al. 2016	human		2014	PRESENT	PRESENT	PRESENT	PRESENT	PRESENT	PRESENT	PRESENT	PRESENT	PRESENT
AUSMDU00003485_S9_	Klebsiella pneumoniae	INF302	Australia	SRR5082444	wyres et al. 2016	human	infection	2014	PRESENT	PRESENT	PRESENT	PRESENT	PRESENT	PRESENT	PRESENT	PRESENT	PRESENT
AUSMDU00003484_S16_	Klebsiella variicola	INF209	Australia	SRR5082470	wyres et al. 2016	human		2013	PRESENT	PRESENT	PRESENT	PRESENT	PRESENT	PRESENT	PRESENT	PRESENT	PRESENT
AUSMDU00003483_S15_	Klebsiella pneumoniae	INF158	Australia	SRR5082491	wyres et al. 2016	human	infection	2013	PRESENT	PRESENT	PRESENT	PRESENT	PRESENT	PRESENT	PRESENT	PRESENT	PRESENT
AUSMDU00003482_S14_	Klebsiella pneumoniae	INF157	Australia	SRR5082482	wyres et al. 2016	human		2013	PRESENT	PRESENT	PRESENT	PRESENT	PRESENT	PRESENT	PRESENT	PRESENT	PRESENT
AUSMDU00003481_S13_	Klebsiella pneumoniae	KSB2_6C	Australia	SRR5082479	wyres et al. 2016	human		2014	PRESENT	PRESENT	PRESENT	PRESENT	PRESENT	PRESENT	PRESENT	PRESENT	PRESENT
AUSMDU00003480_S12_	Klebsiella pneumoniae	KSB2_5C	Australia	SRR5082471	wyres et al. 2016	human	carriage	2014	PRESENT	PRESENT	PRESENT	PRESENT	PRESENT	PRESENT	PRESENT	PRESENT	PRESENT
AUSMDU00003479_S11_	Klebsiella pneumoniae	KSB2_9A	Australia	SRR5082480	wyres et al. 2016	human	carriage	2014	PRESENT	PRESENT	PRESENT	PRESENT	PRESENT	PRESENT	PRESENT	PRESENT	PRESENT
AUSMDU00003478_S10_	Klebsiella pneumoniae	KSB2_5A	Australia	SRR5082474	wyres et al. 2016	human	carriage	2014	PRESENT	PRESENT	PRESENT	PRESENT	PRESENT	PRESENT	PRESENT	PRESENT	PRESENT
AUSMDU00003477_S9_	Klebsiella pneumoniae	KSB2_2B	Australia	SRR5082467	wyres et al. 2016	human	carriage	2014	PRESENT	PRESENT	PRESENT	PRESENT	PRESENT	PRESENT	PRESENT	PRESENT	PRESENT
AUSMDU00003475_S7_	Klebsiella pneumoniae	KSB2_8B	Australia	SRR5082466	wyres et al. 2016	human	carriage	2014	PRESENT	PRESENT	PRESENT	PRESENT	PRESENT	PRESENT	PRESENT	PRESENT	PRESENT
AUSMDU00003473_S5_	Klebsiella pneumoniae	KSB1_9I	Australia	SRR5082457	wyres et al. 2016	human	carriage	2014	PRESENT	PRESENT	PRESENT	PRESENT	PRESENT	PRESENT	PRESENT	PRESENT	PRESENT
AUSMDU00003471_S3_	Klebsiella pneumoniae	KSB1_5H	Australia	SRR5082462	wyres et al. 2016	human	carriage	2014	PRESENT	PRESENT	PRESENT	PRESENT	PRESENT	PRESENT	PRESENT	PRESENT	PRESENT
AUSMDU00003470_S2_	Klebsiella variicola	KSB1_4F	Australia	SRR5082484	wyres et al. 2016	human		2013	PRESENT	PRESENT	PRESENT	PRESENT	PRESENT	PRESENT	PRESENT	PRESENT	PRESENT
AUSMDU00003469_S1_	Klebsiella variicola	KSB1_10E	Australia	SRR5082478	wyres et al. 2016	human		2013	PRESENT	PRESENT	PRESENT	PRESENT	PRESENT	PRESENT	PRESENT	PRESENT	PRESENT
861365_4	Klebsiella pneumoniae	SB3432		FO203501.1,FO203500.1	PATRIC				PRESENT	PRESENT	PRESENT	PRESENT	PRESENT	PRESENT	PRESENT	PRESENT	PRESENT
667127_8	Klebsiella pneumoniae	Urmite		CDNT01000000	PATRIC				PRESENT	PRESENT	PRESENT	PRESENT	PRESENT	PRESENT	PRESENT	PRESENT	PRESENT
573_1887	Klebsiella variicola	1335_KPNE	USA	JVTE01000000	PATRIC	human			PRESENT	PRESENT	PRESENT	PRESENT	PRESENT	PRESENT	PRESENT	PRESENT	PRESENT
573_1886	Klebsiella pneumoniae	912_KPNE	USA	JUOG01000000	PATRIC	human			PRESENT	PRESENT	PRESENT	PRESENT	PRESENT	CONTIG	PRESENT	PRESENT	ABSENT
573_1885	Klebsiella pneumoniae	B199	Israel	LJCB01000000	PATRIC	human	infection		PRESENT	PRESENT	PRESENT	PRESENT	PRESENT	PRESENT	PRESENT	PRESENT	PRESENT
573_1884	Klebsiella pneumoniae	B86	Israel	LJCD01000000	PATRIC	human	infection		PRESENT	PRESENT	PRESENT	PRESENT	PRESENT	PRESENT	PRESENT	PRESENT	PRESENT
573_1762	Klebsiella pneumoniae	unknown		CXPD01000000	PATRIC				PRESENT	PRESENT	PRESENT	PRESENT	PRESENT	PRESENT	PRESENT	PRESENT	PRESENT
573_1761	Klebsiella pneumoniae	KP617	Korea	CP012753,CP012754,CP012755	PATRIC	human	infection	2013	PRESENT	PRESENT	PRESENT	PRESENT	PRESENT	PRESENT	PRESENT	PRESENT	PRESENT
573_1760	Klebsiella pneumoniae	SY-B2	USA	LIPK01000000	PATRIC	human		2014	PRESENT	PRESENT	PRESENT	PRESENT	PRESENT	PRESENT	PRESENT	PRESENT	PRESENT
573_1759	Klebsiella pneumoniae	SY-B	USA	LIPL01000000	PATRIC	human	infection	2014	PRESENT	PRESENT	PRESENT	PRESENT	PRESENT	PRESENT	PRESENT	PRESENT	PRESENT
573_1758	Klebsiella pneumoniae	SY-A	USA	LIPM01000000	PATRIC	human	infection	2014	PRESENT	PRESENT	PRESENT	PRESENT	PRESENT	PRESENT	PRESENT	PRESENT	PRESENT
573_1757	Klebsiella pneumoniae	ST258	Australia	LGAB01000000	PATRIC	human	infection	2014	PRESENT	PRESENT	PRESENT	PRESENT	PRESENT	PRESENT	PRESENT	PRESENT	PRESENT
573_1756	Klebsiella pneumoniae	CHS86	USA	LGKC01000000	PATRIC	human			PRESENT	PRESENT	PRESENT	PRESENT	PRESENT	PRESENT	PRESENT	PRESENT	PRESENT
573_1755	Klebsiella pneumoniae	CHS87	USA	LGKB01000000	PATRIC	human			PRESENT	PRESENT	PRESENT	PRESENT	PRESENT	PRESENT	PRESENT	PRESENT	PRESENT
573_1754	Klebsiella pneumoniae	CHS103	USA	LGKA01000000	PATRIC	human			PRESENT	PRESENT	PRESENT	PRESENT	PRESENT	PRESENT	PRESENT	PRESENT	PRESENT
573_1753	Klebsiella pneumoniae	CHS108	USA	LGJZ01000000	PATRIC	human			PRESENT	PRESENT	PRESENT	PRESENT	PRESENT	PRESENT	PRESENT	PRESENT	PRESENT
573_1752	Klebsiella pneumoniae	CHS119	USA	LGJY01000000	PATRIC	human			PRESENT	PRESENT	PRESENT	PRESENT	PRESENT	PRESENT	PRESENT	PRESENT	PRESENT
573_1751	Klebsiella pneumoniae	CHS120	USA	LGJX01000000	PATRIC	human			PRESENT	PRESENT	PRESENT	PRESENT	PRESENT	PRESENT	PRESENT	PRESENT	PRESENT
573_1750	Klebsiella pneumoniae	CHS124	USA	LGJW01000000	PATRIC	human			PRESENT	PRESENT	PRESENT	PRESENT	PRESENT	PRESENT	PRESENT	PRESENT	PRESENT
573_1749	Klebsiella pneumoniae	CHS136	USA	LGJU01000000	PATRIC	human			PRESENT	PRESENT	PRESENT	PRESENT	PRESENT	PRESENT	PRESENT	PRESENT	PRESENT
573_1748	Klebsiella pneumoniae	CHS130	USA	LGJV01000000	PATRIC	human			PRESENT	PRESENT	PRESENT	PRESENT	PRESENT	PRESENT	PRESENT	PRESENT	PRESENT
573_1747	Klebsiella pneumoniae	CHS175	USA	LGJS01000000	PATRIC	human			PRESENT	PRESENT	PRESENT	PRESENT	PRESENT	PRESENT	PRESENT	PRESENT	PRESENT
573_1746	Klebsiella pneumoniae	CHS171	USA	LGJT01000000	PATRIC	human			PRESENT	PRESENT	PRESENT	PRESENT	PRESENT	PRESENT	PRESENT	PRESENT	PRESENT
573_1745	Klebsiella pneumoniae	CHS187	USA	LGJQ01000000	PATRIC	human			PRESENT	PRESENT	PRESENT	PRESENT	PRESENT	PRESENT	PRESENT	PRESENT	PRESENT
573_1744	Klebsiella pneumoniae	CHS178	USA	LGJR01000000	PATRIC	human			PRESENT	PRESENT	PRESENT	PRESENT	PRESENT	PRESENT	PRESENT	PRESENT	PRESENT
573_1743	Klebsiella pneumoniae	CHS196	USA	LGJP01000000	PATRIC	human			PRESENT	PRESENT	PRESENT	PRESENT	PRESENT	PRESENT	PRESENT	PRESENT	PRESENT
573_1742	Klebsiella pneumoniae	CHS198	USA	LGJO01000000	PATRIC	human			PRESENT	PRESENT	PRESENT	PRESENT	PRESENT	PRESENT	PRESENT	PRESENT	PRESENT
573_1741	Klebsiella pneumoniae	CHS212	USA	LGJN01000000	PATRIC	human			PRESENT	PRESENT	PRESENT	PRESENT	PRESENT	PRESENT	PRESENT	PRESENT	PRESENT
573_1740	Klebsiella pneumoniae	CHS238	USA	LGJM01000000	PATRIC	human			PRESENT	PRESENT	PRESENT	PRESENT	PRESENT	PRESENT	PRESENT	PRESENT	PRESENT
573_1739	Klebsiella pneumoniae	CHS239	USA	LGJL01000000	PATRIC	human			PRESENT	PRESENT	PRESENT	PRESENT	PRESENT	PRESENT	PRESENT	PRESENT	PRESENT
573_1738	Klebsiella pneumoniae	UCI69		LGJI01000000	PATRIC	human			PRESENT	PRESENT	PRESENT	PRESENT	PRESENT	PRESENT	PRESENT	PRESENT	PRESENT
573_1737	Klebsiella pneumoniae	CHS240	USA	LGJK01000000	PATRIC	human			PRESENT	PRESENT	PRESENT	PRESENT	PRESENT	PRESENT	PRESENT	PRESENT	PRESENT
573_1736	Klebsiella pneumoniae	MGH83		LGJJ01000000	PATRIC	human			PRESENT	PRESENT	PRESENT	PRESENT	PRESENT	PRESENT	PRESENT	PRESENT	PRESENT
573_1734	Klebsiella pneumoniae	unknown		CDFX01000000	PATRIC			2013	PRESENT	PRESENT	PRESENT	PRESENT	PRESENT	PRESENT	PRESENT	PRESENT	PRESENT
573_1733	Klebsiella pneumoniae	unknown		CDFZ01000000	PATRIC			2013	PRESENT	PRESENT	PRESENT	PRESENT	PRESENT	PRESENT	PRESENT	PRESENT	PRESENT
573_1732	Klebsiella pneumoniae	unknown		CDFW01000000	PATRIC			2013	PRESENT	PRESENT	PRESENT	PRESENT	PRESENT	PRESENT	PRESENT	PRESENT	PRESENT
573_1731	Klebsiella pneumoniae	unknown		CDFY01000000	PATRIC			2013	PRESENT	PRESENT	PRESENT	PRESENT	PRESENT	PRESENT	PRESENT	PRESENT	PRESENT
573_1730	Klebsiella pneumoniae	unknown		CDFV01000000	PATRIC			2013	PRESENT	PRESENT	PRESENT	PRESENT	PRESENT	PRESENT	PRESENT	PRESENT	PRESENT
573_1729	Klebsiella pneumoniae	unknown		CDFU01000000	PATRIC			2013	PRESENT	PRESENT	PRESENT	PRESENT	PRESENT	PRESENT	PRESENT	PRESENT	PRESENT
573_1728	Klebsiella pneumoniae	unknown		CDFT01000000	PATRIC			2013	PRESENT	PRESENT	PRESENT	PRESENT	PRESENT	PRESENT	PRESENT	PRESENT	PRESENT
573_1727	Klebsiella pneumoniae	unknown		CDGD01000000	PATRIC			2013	PRESENT	PRESENT	PRESENT	PRESENT	PRESENT	PRESENT	PRESENT	PRESENT	PRESENT
573_1726	Klebsiella pneumoniae	unknown		CDGC01000000	PATRIC			2013	PRESENT	PRESENT	PRESENT	PRESENT	PRESENT	PRESENT	PRESENT	PRESENT	PRESENT
573_1725	Klebsiella pneumoniae	unknown		CDGB01000000	PATRIC			2011	PRESENT	PRESENT	PRESENT	PRESENT	PRESENT	PRESENT	PRESENT	PRESENT	PRESENT
573_1724	Klebsiella pneumoniae	unknown		CDGA01000000	PATRIC			2011	PRESENT	PRESENT	PRESENT	PRESENT	PRESENT	PRESENT	PRESENT	PRESENT	PRESENT
573_1723	Klebsiella pneumoniae	unknown		CDFO01000000	PATRIC			2011	PRESENT	PRESENT	PRESENT	PRESENT	PRESENT	PRESENT	PRESENT	PRESENT	PRESENT
573_1722	Klebsiella pneumoniae	unknown		CDFQ01000000	PATRIC			2011	PRESENT	PRESENT	PRESENT	PRESENT	PRESENT	PRESENT	PRESENT	PRESENT	PRESENT
573_1721	Klebsiella pneumoniae	unknown		CDFR01000000	PATRIC			2013	PRESENT	PRESENT	PRESENT	PRESENT	PRESENT	PRESENT	PRESENT	PRESENT	PRESENT
573_1720	Klebsiella pneumoniae	unknown		CDFP01000000	PATRIC			2013	PRESENT	PRESENT	PRESENT	PRESENT	PRESENT	PRESENT	PRESENT	PRESENT	PRESENT
573_1719	Klebsiella pneumoniae	unknown		CDFM01000000	PATRIC			2012	PRESENT	PRESENT	PRESENT	PRESENT	PRESENT	PRESENT	PRESENT	PRESENT	PRESENT
573_1717	Klebsiella pneumoniae	98_KPNE	USA	JULE01000000	PATRIC	human			PRESENT	PRESENT	PRESENT	PRESENT	PRESENT	PRESENT	PRESENT	PRESENT	PRESENT
573_1716	Klebsiella pneumoniae	930_KPNE	USA	JUND01000000	PATRIC	human			PRESENT	PRESENT	PRESENT	PRESENT	PRESENT	PRESENT	PRESENT	PRESENT	PRESENT
573_1715	Klebsiella pneumoniae	913_KPNE	USA	JUOE01000000	PATRIC	human			PRESENT	PRESENT	PRESENT	PRESENT	PRESENT	PRESENT	PRESENT	PRESENT	PRESENT
573_1714	Klebsiella quasipneumoniae subsp. quasipneumoniae	865_KPNE	USA	JUQB01000000	PATRIC	human			PRESENT	PRESENT	PRESENT	PRESENT	PRESENT	PRESENT	PRESENT	PRESENT	PRESENT
573_1713	Klebsiella pneumoniae	863_KPNE	USA	JUQD01000000	PATRIC	human			PRESENT	PRESENT	PRESENT	PRESENT	PRESENT	PRESENT	PRESENT	PRESENT	PRESENT
573_1712	Klebsiella variicola	837_KPNE	USA	JURE01000000	PATRIC	human			PRESENT	PRESENT	PRESENT	PRESENT	PRESENT	PRESENT	PRESENT	PRESENT	PRESENT
573_1711	Klebsiella variicola	834_KPNE	USA	JURH01000000	PATRIC	human			PRESENT	PRESENT	PRESENT	PRESENT	PRESENT	PRESENT	PRESENT	PRESENT	PRESENT
573_1710	Klebsiella pneumoniae	755.rep2_KPNE	USA	JUUH01000000	PATRIC	human			PRESENT	PRESENT	PRESENT	PRESENT	PRESENT	PRESENT	PRESENT	PRESENT	PRESENT
573_1709	Klebsiella pneumoniae	755.rep1_KPNE	USA	JUUI01000000	PATRIC	human			PRESENT	PRESENT	PRESENT	PRESENT	PRESENT	PRESENT	PRESENT	PRESENT	PRESENT
573_1708	Klebsiella pneumoniae	887_KPNE	USA	JUPH01000000	PATRIC	human			PRESENT	PRESENT	PRESENT	PRESENT	PRESENT	PRESENT	PRESENT	PRESENT	PRESENT
573_1707	Klebsiella pneumoniae	845_KPNE	USA	JUQV01000000	PATRIC	human			PRESENT	PRESENT	PRESENT	PRESENT	PRESENT	PRESENT	PRESENT	PRESENT	PRESENT
573_1706	Klebsiella variicola	836_KPNE	USA	JURF01000000	PATRIC	human			PRESENT	PRESENT	PRESENT	PRESENT	PRESENT	PRESENT	PRESENT	PRESENT	PRESENT
573_1705	Klebsiella variicola	835_KPNE	USA	JURG01000000	PATRIC	human			PRESENT	PRESENT	PRESENT	PRESENT	PRESENT	PRESENT	PRESENT	PRESENT	PRESENT
573_1704	Klebsiella variicola	833_KPNE	USA	JURI01000000	PATRIC	human			PRESENT	CONTIG	PRESENT	PRESENT	PRESENT	PRESENT	PRESENT	CONTIG	PRESENT
573_1703	Klebsiella pneumoniae	813_KPNE	USA	JURV01000000	PATRIC	human			PRESENT	PRESENT	PRESENT	PRESENT	PRESENT	PRESENT	PRESENT	PRESENT	PRESENT
573_1702	Klebsiella variicola	780_KPNE	USA	JUTF01000000	PATRIC	human			PRESENT	PRESENT	PRESENT	PRESENT	PRESENT	PRESENT	PRESENT	PRESENT	PRESENT
573_1701	Klebsiella pneumoniae	743_KPNE	USA	JUUV01000000	PATRIC	human			PRESENT	PRESENT	PRESENT	PRESENT	PRESENT	PRESENT	PRESENT	PRESENT	PRESENT
573_1700	Klebsiella pneumoniae	741_KPNE	USA	JUUX01000000	PATRIC	human			PRESENT	PRESENT	PRESENT	PRESENT	PRESENT	PRESENT	PRESENT	PRESENT	PRESENT
573_1699	Klebsiella pneumoniae	733_KPNE	USA	JUVG01000000	PATRIC	human			PRESENT	PRESENT	PRESENT	PRESENT	PRESENT	PRESENT	PRESENT	PRESENT	PRESENT
573_1698	Klebsiella pneumoniae	731_KPNE	USA	JUVI01000000	PATRIC	human			PRESENT	PRESENT	PRESENT	PRESENT	PRESENT	PRESENT	PRESENT	PRESENT	PRESENT
573_1697	Klebsiella pneumoniae	648_KPNE	USA	JUYR01000000	PATRIC	human			PRESENT	PRESENT	PRESENT	PRESENT	PRESENT	PRESENT	PRESENT	PRESENT	PRESENT
573_1696	Klebsiella pneumoniae	501_KPNE	USA	JVEQ01000000	PATRIC	human			PRESENT	PRESENT	PRESENT	PRESENT	PRESENT	PRESENT	PRESENT	PRESENT	PRESENT
573_1695	Klebsiella pneumoniae	436_KPNE	USA	JVHD01000000	PATRIC	human			PRESENT	PRESENT	PRESENT	PRESENT	PRESENT	PRESENT	PRESENT	PRESENT	PRESENT
573_1694	Klebsiella pneumoniae	221_KPNE	USA	JVPK01000000	PATRIC	human			PRESENT	PRESENT	PRESENT	PRESENT	PRESENT	PRESENT	PRESENT	PRESENT	PRESENT
573_1693	Klebsiella pneumoniae	187_KPNE	USA	JVQU01000000	PATRIC	human			PRESENT	PRESENT	PRESENT	PRESENT	PRESENT	PRESENT	PRESENT	PRESENT	PRESENT
573_1692	Klebsiella pneumoniae	570_KPNE	USA	JVBQ01000000	PATRIC	human			PRESENT	PRESENT	PRESENT	PRESENT	PRESENT	PRESENT	PRESENT	PRESENT	PRESENT
573_1691	Klebsiella pneumoniae	500_KPNE	USA	JVER01000000	PATRIC	human			PRESENT	PRESENT	PRESENT	PRESENT	PRESENT	PRESENT	PRESENT	PRESENT	PRESENT
573_1690	Klebsiella pneumoniae	194_KPNE	USA	JVQM01000000	PATRIC	human			PRESENT	PRESENT	PRESENT	PRESENT	PRESENT	PRESENT	PRESENT	PRESENT	PRESENT
573_1689	Klebsiella pneumoniae	1263_KPNE	USA	JVWL01000000	PATRIC	human			PRESENT	PRESENT	PRESENT	PRESENT	PRESENT	PRESENT	PRESENT	PRESENT	PRESENT
573_1688	Klebsiella pneumoniae	1035_KPNE	USA	JWFI01000000	PATRIC	human			CONTIG	CONTIG	PRESENT	PRESENT	PRESENT	PRESENT	PRESENT	ABSENT	PRESENT
573_1687	Klebsiella pneumoniae	1010_KPNE	USA	JWGK01000000	PATRIC	human			PRESENT	PRESENT	PRESENT	PRESENT	PRESENT	PRESENT	PRESENT	PRESENT	PRESENT
573_1686	Klebsiella pneumoniae	1331_KPNE	USA	JVTI01000000	PATRIC	human			PRESENT	PRESENT	PRESENT	PRESENT	PRESENT	PRESENT	PRESENT	PRESENT	PRESENT
573_1685	Klebsiella pneumoniae	1239_KPNE	USA	JVXM01000000	PATRIC	human			PRESENT	PRESENT	PRESENT	PRESENT	PRESENT	PRESENT	PRESENT	PRESENT	PRESENT
573_1684	Klebsiella pneumoniae	1041_KPNE	USA	JWFB01000000	PATRIC	human			PRESENT	PRESENT	PRESENT	PRESENT	PRESENT	PRESENT	PRESENT	PRESENT	PRESENT
573_1683	Klebsiella quasipneumoniae subsp. similipneumoniae	1294_KPNE	USA	JVVC01000000	PATRIC	human			PRESENT	PRESENT	PRESENT	PRESENT	PRESENT	PRESENT	PRESENT	PRESENT	PRESENT
573_1682	Klebsiella pneumoniae	1183_KPNE	USA	JVZX01000000	PATRIC	human			PRESENT	PRESENT	PRESENT	PRESENT	PRESENT	PRESENT	PRESENT	PRESENT	PRESENT
573_1681	Klebsiella pneumoniae	1098_KPNE	USA	JWDA01000000	PATRIC	human			PRESENT	CONTIG	PRESENT	PRESENT	PRESENT	PRESENT	PRESENT	CONTIG	PRESENT
573_1680	Klebsiella pneumoniae	1012_KPNE	USA	JWGI01000000	PATRIC	human			PRESENT	PRESENT	PRESENT	PRESENT	PRESENT	PRESENT	PRESENT	PRESENT	PRESENT
573_1679	Klebsiella pneumoniae	JS86C16	USA	LDZO01000000	PATRIC	human	infection	2013	PRESENT	PRESENT	PRESENT	PRESENT	PRESENT	PRESENT	PRESENT	PRESENT	PRESENT
573_1678	Klebsiella pneumoniae	UCI96		LFBQ01000000	PATRIC	human			PRESENT	PRESENT	PRESENT	PRESENT	PRESENT	PRESENT	PRESENT	PRESENT	PRESENT
573_1677	Klebsiella pneumoniae	UCI95		LFBP01000000	PATRIC	human			PRESENT	PRESENT	PRESENT	PRESENT	PRESENT	PRESENT	PRESENT	PRESENT	PRESENT
573_1676	Klebsiella pneumoniae	UCI94		LFBO01000000	PATRIC	human			PRESENT	PRESENT	PRESENT	PRESENT	PRESENT	PRESENT	PRESENT	PRESENT	PRESENT
573_1675	Klebsiella pneumoniae	UCI93		LFBN01000000	PATRIC	human			PRESENT	PRESENT	PRESENT	PRESENT	PRESENT	PRESENT	PRESENT	PRESENT	PRESENT
573_1674	Klebsiella pneumoniae	UCI92		LFBM01000000	PATRIC	human			PRESENT	PRESENT	PRESENT	PRESENT	PRESENT	PRESENT	PRESENT	PRESENT	PRESENT
573_1673	Klebsiella pneumoniae	UCI91		LFBL01000000	PATRIC	human			PRESENT	PRESENT	PRESENT	PRESENT	PRESENT	PRESENT	PRESENT	PRESENT	PRESENT
573_1672	Klebsiella pneumoniae	UCI82		LFBK01000000	PATRIC	human			PRESENT	PRESENT	PRESENT	PRESENT	PRESENT	PRESENT	PRESENT	PRESENT	PRESENT
573_1671	Klebsiella pneumoniae	UCI81		LFBJ01000000	PATRIC	human			PRESENT	PRESENT	PRESENT	PRESENT	PRESENT	PRESENT	PRESENT	PRESENT	PRESENT
573_1670	Klebsiella pneumoniae	UCI76		LFBI01000000	PATRIC	human			PRESENT	PRESENT	PRESENT	PRESENT	PRESENT	PRESENT	PRESENT	PRESENT	PRESENT
573_1669	Klebsiella pneumoniae	UCI75		LFBH01000000	PATRIC	human			PRESENT	PRESENT	PRESENT	PRESENT	PRESENT	PRESENT	PRESENT	PRESENT	PRESENT
573_1668	Klebsiella pneumoniae	UCI70		LFBG01000000	PATRIC	human			PRESENT	PRESENT	PRESENT	PRESENT	PRESENT	PRESENT	PRESENT	PRESENT	PRESENT
573_1667	Klebsiella pneumoniae	BIDMC96		LFBF01000000	PATRIC	human			PRESENT	PRESENT	PRESENT	PRESENT	PRESENT	PRESENT	PRESENT	PRESENT	PRESENT
573_1666	Klebsiella quasipneumoniae subsp. similipneumoniae	BIDMC95		LFBE01000000	PATRIC	human			PRESENT	PRESENT	PRESENT	PRESENT	PRESENT	PRESENT	PRESENT	PRESENT	PRESENT
573_1665	Klebsiella pneumoniae	BIDMC91		LFBD01000000	PATRIC	human			PRESENT	PRESENT	PRESENT	PRESENT	PRESENT	PRESENT	PRESENT	PRESENT	PRESENT
573_1664	Klebsiella variicola	BIDMC90		LFBC01000000	PATRIC	human			PRESENT	PRESENT	PRESENT	PRESENT	PRESENT	PRESENT	PRESENT	PRESENT	PRESENT
573_1663	Klebsiella pneumoniae	BIDMC89		LFBB01000000	PATRIC	human			PRESENT	PRESENT	PRESENT	PRESENT	PRESENT	PRESENT	PRESENT	PRESENT	PRESENT
573_1662	Klebsiella variicola	BIDMC88		LFBA01000000	PATRIC	human			PRESENT	PRESENT	PRESENT	PRESENT	PRESENT	PRESENT	PRESENT	PRESENT	PRESENT
573_1661	Klebsiella pneumoniae	BIDMC86		LFAZ01000000	PATRIC	human			PRESENT	PRESENT	PRESENT	PRESENT	PRESENT	PRESENT	PRESENT	PRESENT	PRESENT
573_1660	Klebsiella pneumoniae	BIDMC85		LFAY01000000	PATRIC	human			PRESENT	PRESENT	PRESENT	PRESENT	PRESENT	PRESENT	PRESENT	PRESENT	PRESENT
573_1659	Klebsiella pneumoniae	MGH126		LFAX01000000	PATRIC	human			PRESENT	PRESENT	PRESENT	PRESENT	PRESENT	PRESENT	PRESENT	PRESENT	PRESENT
573_1658	Klebsiella pneumoniae	MGH125		LFAW01000000	PATRIC	human			PRESENT	PRESENT	PRESENT	PRESENT	PRESENT	PRESENT	PRESENT	PRESENT	PRESENT
573_1657	Klebsiella pneumoniae	MGH124		LFAV01000000	PATRIC	human			PRESENT	PRESENT	PRESENT	PRESENT	PRESENT	PRESENT	PRESENT	PRESENT	PRESENT
573_1656	Klebsiella quasipneumoniae subsp. similipneumoniae	MGH123		LFAU01000000	PATRIC	human			PRESENT	PRESENT	PRESENT	PRESENT	PRESENT	PRESENT	PRESENT	PRESENT	PRESENT
573_1655	Klebsiella pneumoniae	MGH118		LFAT01000000	PATRIC	human			PRESENT	PRESENT	PRESENT	PRESENT	PRESENT	PRESENT	PRESENT	PRESENT	PRESENT
573_1654	Klebsiella pneumoniae	MGH117		LFAS01000000	PATRIC	human			PRESENT	PRESENT	PRESENT	PRESENT	PRESENT	PRESENT	PRESENT	PRESENT	PRESENT
573_1653	Klebsiella pneumoniae	MGH115		LFAQ01000000	PATRIC	human			PRESENT	PRESENT	PRESENT	PRESENT	PRESENT	PRESENT	PRESENT	PRESENT	PRESENT
573_1652	Klebsiella pneumoniae	MGH116		LFAR01000000	PATRIC	human			PRESENT	PRESENT	PRESENT	PRESENT	PRESENT	PRESENT	PRESENT	PRESENT	PRESENT
573_1651	Klebsiella variicola	MGH114		LFAP01000000	PATRIC	human			PRESENT	PRESENT	PRESENT	PRESENT	PRESENT	PRESENT	PRESENT	PRESENT	PRESENT
573_1650	Klebsiella quasipneumoniae subsp. quasipneumoniae	MGH113		LFAO01000000	PATRIC	human			PRESENT	PRESENT	PRESENT	PRESENT	PRESENT	PRESENT	PRESENT	PRESENT	PRESENT
573_1649	Klebsiella pneumoniae	MGH112		LFAN01000000	PATRIC	human			PRESENT	PRESENT	PRESENT	PRESENT	PRESENT	PRESENT	PRESENT	PRESENT	PRESENT
573_1648	Klebsiella pneumoniae	MGH111		LFAM01000000	PATRIC	human			PRESENT	PRESENT	PRESENT	PRESENT	PRESENT	PRESENT	PRESENT	PRESENT	PRESENT
573_1647	Klebsiella pneumoniae	MGH102		LFAL01000000	PATRIC	human			PRESENT	PRESENT	PRESENT	PRESENT	PRESENT	PRESENT	PRESENT	PRESENT	PRESENT
573_1646	Klebsiella pneumoniae	MGH101		LFAK01000000	PATRIC	human			PRESENT	PRESENT	PRESENT	PRESENT	PRESENT	PRESENT	PRESENT	PRESENT	PRESENT
573_1645	Klebsiella pneumoniae	MGH98		LFAJ01000000	PATRIC	human			PARTIAL	PRESENT	PRESENT	STOPS	PRESENT	PRESENT	PRESENT	ABSENT	PRESENT
573_1644	Klebsiella pneumoniae	MGH97		LFAI01000000	PATRIC	human			PRESENT	PRESENT	PRESENT	PRESENT	PRESENT	PRESENT	PRESENT	PRESENT	PRESENT
573_1643	Klebsiella pneumoniae	MGH95		LFAG01000000	PATRIC	human			PRESENT	PRESENT	PRESENT	PRESENT	PRESENT	PRESENT	PRESENT	PRESENT	PRESENT
573_1642	Klebsiella quasipneumoniae subsp. quasipneumoniae	MGH96		LFAH01000000	PATRIC	human			PRESENT	PRESENT	PRESENT	PRESENT	PRESENT	PRESENT	PRESENT	PRESENT	PRESENT
573_1641	Klebsiella pneumoniae	MGH94		LFAF01000000	PATRIC	human			PRESENT	PRESENT	PRESENT	PRESENT	PRESENT	PRESENT	PRESENT	PRESENT	PRESENT
573_1640	Klebsiella pneumoniae	MGH93		LFAE01000000	PATRIC	human			PRESENT	PRESENT	PRESENT	PRESENT	PRESENT	PRESENT	PRESENT	PRESENT	PRESENT
573_1639	Klebsiella variicola	MGH92		LFAD01000000	PATRIC	human			PRESENT	PRESENT	PRESENT	PRESENT	PRESENT	PRESENT	PRESENT	PRESENT	PRESENT
573_1638	Klebsiella pneumoniae	MGH91		LFAC01000000	PATRIC	human			PRESENT	PRESENT	PRESENT	PRESENT	PRESENT	PRESENT	PRESENT	PRESENT	PRESENT
573_1637	Klebsiella pneumoniae	MGH90		LFAB01000000	PATRIC	human			PRESENT	PRESENT	PRESENT	PRESENT	PRESENT	PRESENT	PRESENT	PRESENT	PRESENT
573_1636	Klebsiella pneumoniae	MGH89		LFAA01000000	PATRIC	human			PRESENT	PRESENT	PRESENT	PRESENT	PRESENT	PRESENT	PRESENT	PRESENT	PRESENT
573_1635	Klebsiella pneumoniae	MGH84		LEZZ01000000	PATRIC	human			PRESENT	PRESENT	PRESENT	PRESENT	PRESENT	PRESENT	PRESENT	PRESENT	PRESENT
573_1634	Klebsiella pneumoniae	MGH82		LEZY01000000	PATRIC	human			PRESENT	PRESENT	PRESENT	PRESENT	PRESENT	PRESENT	PRESENT	PRESENT	PRESENT
573_1633	Klebsiella pneumoniae	MGH81		LEZX01000000	PATRIC	human			PRESENT	PRESENT	PRESENT	PRESENT	PRESENT	PRESENT	PRESENT	PRESENT	PRESENT
573_1632	Klebsiella pneumoniae	BWH62	USA	LEZW01000000	PATRIC	human			PRESENT	PRESENT	PRESENT	PRESENT	PRESENT	PRESENT	PRESENT	PRESENT	PRESENT
573_1631	Klebsiella pneumoniae	BWH58	USA	LEZV01000000	PATRIC	human			PRESENT	PRESENT	PRESENT	PRESENT	PRESENT	PRESENT	PRESENT	PRESENT	PRESENT
573_1630	Klebsiella pneumoniae	BWH53	USA	LEZU01000000	PATRIC	human			PRESENT	PRESENT	PRESENT	PRESENT	PRESENT	PRESENT	PRESENT	PRESENT	PRESENT
573_1629	Klebsiella pneumoniae	CHS237	USA	LEZT01000000	PATRIC	human			PRESENT	PRESENT	PRESENT	PRESENT	PRESENT	PRESENT	PRESENT	PRESENT	PRESENT
573_1628	Klebsiella pneumoniae	CHS236	USA	LEZS01000000	PATRIC	human			PRESENT	PRESENT	PRESENT	PRESENT	PRESENT	PRESENT	PRESENT	PRESENT	PRESENT
573_1627	Klebsiella pneumoniae	CHS235	USA	LEZR01000000	PATRIC	human			PRESENT	PRESENT	PRESENT	PRESENT	PRESENT	PRESENT	PRESENT	PRESENT	PRESENT
573_1626	Klebsiella pneumoniae	CHS234	USA	LEZQ01000000	PATRIC	human			PRESENT	PRESENT	PRESENT	PRESENT	PRESENT	PRESENT	PRESENT	PRESENT	PRESENT
573_1625	Klebsiella pneumoniae	CHS232	USA	LEZP01000000	PATRIC	human			PRESENT	PRESENT	PRESENT	PRESENT	PRESENT	PRESENT	PRESENT	PRESENT	PRESENT
573_1624	Klebsiella pneumoniae	CHS231	USA	LEZO01000000	PATRIC	human			PRESENT	PRESENT	PRESENT	PRESENT	PRESENT	PRESENT	PRESENT	PRESENT	PRESENT
573_1623	Klebsiella pneumoniae	CHS230	USA	LEZN01000000	PATRIC	human			PRESENT	PRESENT	PRESENT	PRESENT	PRESENT	PRESENT	PRESENT	PRESENT	PRESENT
573_1622	Klebsiella pneumoniae	CHS229	USA	LEZM01000000	PATRIC	human			PRESENT	PRESENT	PRESENT	PRESENT	PRESENT	PRESENT	PRESENT	PRESENT	PRESENT
573_1621	Klebsiella pneumoniae	CHS228	USA	LEZL01000000	PATRIC	human			PRESENT	PRESENT	PRESENT	PRESENT	PRESENT	PRESENT	PRESENT	PRESENT	PRESENT
573_1620	Klebsiella pneumoniae	CHS226	USA	LEZK01000000	PATRIC	human			PRESENT	PRESENT	PRESENT	PRESENT	PRESENT	PRESENT	PRESENT	PRESENT	PRESENT
573_1619	Klebsiella pneumoniae	CHS225	USA	LEZJ01000000	PATRIC	human			PRESENT	PRESENT	PRESENT	PRESENT	PRESENT	PRESENT	PRESENT	PRESENT	PRESENT
573_1618	Klebsiella pneumoniae	CHS224	USA	LEZI01000000	PATRIC	human			PRESENT	PRESENT	PRESENT	PRESENT	PRESENT	PRESENT	PRESENT	PRESENT	PRESENT
573_1617	Klebsiella pneumoniae	CHS223	USA	LEZH01000000	PATRIC	human			PRESENT	PRESENT	PRESENT	PRESENT	PRESENT	PRESENT	PRESENT	PRESENT	PRESENT
573_1616	Klebsiella pneumoniae	CHS221	USA	LEZG01000000	PATRIC	human			PRESENT	PRESENT	PRESENT	PRESENT	PRESENT	PRESENT	PRESENT	PRESENT	PRESENT
573_1615	Klebsiella pneumoniae	CHS220	USA	LEZF01000000	PATRIC	human			PRESENT	PRESENT	PRESENT	PRESENT	PRESENT	PRESENT	PRESENT	PRESENT	PRESENT
573_1614	Klebsiella pneumoniae	CHS219	USA	LEZE01000000	PATRIC	human			PRESENT	PRESENT	PRESENT	PRESENT	PRESENT	PRESENT	PRESENT	PRESENT	PRESENT
573_1613	Klebsiella pneumoniae	CHS218	USA	LEZD01000000	PATRIC	human			PRESENT	PRESENT	PRESENT	PRESENT	PRESENT	PRESENT	PRESENT	PRESENT	PRESENT
573_1612	Klebsiella pneumoniae	CHS217	USA	LEZC01000000	PATRIC	human			PRESENT	PRESENT	PRESENT	PRESENT	PRESENT	PRESENT	PRESENT	PRESENT	PRESENT
573_1611	Klebsiella pneumoniae	CHS216	USA	LEZB01000000	PATRIC	human			PRESENT	PRESENT	PRESENT	PRESENT	PRESENT	PRESENT	PRESENT	PRESENT	PRESENT
573_1610	Klebsiella pneumoniae	CHS215	USA	LEZA01000000	PATRIC	human			PRESENT	PRESENT	PRESENT	PRESENT	PRESENT	PRESENT	PRESENT	PRESENT	PRESENT
573_1609	Klebsiella pneumoniae	CHS214	USA	LEYZ01000000	PATRIC	human			PRESENT	PRESENT	PRESENT	PRESENT	PRESENT	PRESENT	PRESENT	PRESENT	PRESENT
573_1608	Klebsiella pneumoniae	CHS213	USA	LEYY01000000	PATRIC	human			PRESENT	PRESENT	PRESENT	PRESENT	PRESENT	PRESENT	PRESENT	PRESENT	PRESENT
573_1607	Klebsiella pneumoniae	CHS211	USA	LEYX01000000	PATRIC	human			PRESENT	PRESENT	PRESENT	PRESENT	PRESENT	PRESENT	PRESENT	PRESENT	PRESENT
573_1606	Klebsiella pneumoniae	CHS210	USA	LEYW01000000	PATRIC	human			PRESENT	PRESENT	PRESENT	PRESENT	PRESENT	PRESENT	PRESENT	PRESENT	PRESENT
573_1605	Klebsiella pneumoniae	CHS209	USA	LEYV01000000	PATRIC	human			PRESENT	PRESENT	PRESENT	PRESENT	PRESENT	PRESENT	PRESENT	PRESENT	PRESENT
573_1604	Klebsiella pneumoniae	CHS208	USA	LEYU01000000	PATRIC	human			PRESENT	PRESENT	PRESENT	PRESENT	PRESENT	PRESENT	PRESENT	PRESENT	PRESENT
573_1603	Klebsiella pneumoniae	CHS207	USA	LEYT01000000	PATRIC	human			PRESENT	PRESENT	PRESENT	PRESENT	PRESENT	PRESENT	PRESENT	PRESENT	PRESENT
573_1602	Klebsiella pneumoniae	CHS206	USA	LEYS01000000	PATRIC	human			PRESENT	PRESENT	PRESENT	PRESENT	PRESENT	PRESENT	PRESENT	PRESENT	PRESENT
573_1601	Klebsiella pneumoniae	CHS205	USA	LEYR01000000	PATRIC	human			PRESENT	PRESENT	PRESENT	PRESENT	PRESENT	PRESENT	PRESENT	PRESENT	PRESENT
573_1600	Klebsiella pneumoniae	CHS202	USA	LEYQ01000000	PATRIC	human			PRESENT	PRESENT	PRESENT	PRESENT	PRESENT	PRESENT	PRESENT	PRESENT	PRESENT
573_1599	Klebsiella pneumoniae	CHS201	USA	LEYP01000000	PATRIC	human			PRESENT	PRESENT	PRESENT	PRESENT	PRESENT	PRESENT	PRESENT	PRESENT	PRESENT
573_1598	Klebsiella pneumoniae	CHS200	USA	LEYO01000000	PATRIC	human			PRESENT	PRESENT	PRESENT	PRESENT	PRESENT	PRESENT	PRESENT	PRESENT	PRESENT
573_1597	Klebsiella pneumoniae	CHS197	USA	LEYM01000000	PATRIC	human			PRESENT	PRESENT	PRESENT	PRESENT	PRESENT	PRESENT	PRESENT	PRESENT	PRESENT
573_1596	Klebsiella pneumoniae	CHS195	USA	LEYL01000000	PATRIC	human			PRESENT	PRESENT	PRESENT	PRESENT	PRESENT	PRESENT	PRESENT	PRESENT	PRESENT
573_1595	Klebsiella pneumoniae	CHS194	USA	LEYK01000000	PATRIC	human			PRESENT	PRESENT	PRESENT	PRESENT	PRESENT	PRESENT	PRESENT	PRESENT	PRESENT
573_1594	Klebsiella pneumoniae	CHS192	USA	LEYJ01000000	PATRIC	human			PRESENT	PRESENT	PRESENT	PRESENT	PRESENT	PRESENT	PRESENT	PRESENT	PRESENT
573_1593	Klebsiella pneumoniae	CHS191	USA	LEYI01000000	PATRIC	human			PRESENT	PRESENT	PRESENT	PRESENT	PRESENT	PRESENT	PRESENT	PRESENT	PRESENT
573_1592	Klebsiella pneumoniae	CHS189	USA	LEYH01000000	PATRIC	human			PRESENT	PRESENT	PRESENT	PRESENT	PRESENT	PRESENT	PRESENT	PRESENT	PRESENT
573_1591	Klebsiella pneumoniae	CHS186	USA	LEYG01000000	PATRIC	human			PRESENT	PRESENT	PRESENT	PRESENT	PRESENT	PRESENT	PRESENT	PRESENT	PRESENT
573_1590	Klebsiella pneumoniae	CHS185	USA	LEYF01000000	PATRIC	human			PRESENT	PRESENT	PRESENT	PRESENT	PRESENT	PRESENT	PRESENT	PRESENT	PRESENT
573_1589	Klebsiella pneumoniae	CHS184	USA	LEYE01000000	PATRIC	human			PRESENT	PRESENT	PRESENT	PRESENT	PRESENT	PRESENT	PRESENT	PRESENT	PRESENT
573_1588	Klebsiella pneumoniae	CHS183	USA	LEYD01000000	PATRIC	human			PRESENT	PRESENT	PRESENT	PRESENT	PRESENT	PRESENT	PRESENT	PRESENT	PRESENT
573_1587	Klebsiella pneumoniae	CHS182	USA	LEYC01000000	PATRIC	human			PRESENT	PRESENT	PRESENT	PRESENT	PRESENT	PRESENT	PRESENT	PRESENT	PRESENT
573_1586	Klebsiella pneumoniae	CHS181	USA	LEYB01000000	PATRIC	human			PRESENT	PRESENT	PRESENT	PRESENT	PRESENT	PRESENT	PRESENT	PRESENT	PRESENT
573_1585	Klebsiella pneumoniae	CHS179	USA	LEYA01000000	PATRIC	human			PRESENT	PRESENT	PRESENT	PRESENT	PRESENT	PRESENT	PRESENT	PRESENT	PRESENT
573_1584	Klebsiella pneumoniae	CHS177	USA	LEXZ01000000	PATRIC	human			PRESENT	PRESENT	PRESENT	PRESENT	PRESENT	PRESENT	PRESENT	PRESENT	PRESENT
573_1583	Klebsiella pneumoniae	CHS176	USA	LEXY01000000	PATRIC	human			PRESENT	PRESENT	PRESENT	PRESENT	PRESENT	PRESENT	PRESENT	PRESENT	PRESENT
573_1582	Klebsiella pneumoniae	CHS174	USA	LEXX01000000	PATRIC	human			PRESENT	PRESENT	PRESENT	PRESENT	PRESENT	PRESENT	PRESENT	PRESENT	PRESENT
573_1581	Klebsiella pneumoniae	CHS173	USA	LEXW01000000	PATRIC	human			PRESENT	PRESENT	PRESENT	PRESENT	PRESENT	PRESENT	PRESENT	PRESENT	PRESENT
573_1580	Klebsiella pneumoniae	CHS172	USA	LEXV01000000	PATRIC	human			PRESENT	PRESENT	PRESENT	PRESENT	PRESENT	PRESENT	PRESENT	PRESENT	PRESENT
573_1579	Klebsiella pneumoniae	CHS170	USA	LEXU01000000	PATRIC	human			PRESENT	PRESENT	PRESENT	PRESENT	PRESENT	PRESENT	PRESENT	PRESENT	PRESENT
573_1578	Klebsiella pneumoniae	CHS169	USA	LEXT01000000	PATRIC	human			PRESENT	PRESENT	PRESENT	PRESENT	PRESENT	PRESENT	PRESENT	PRESENT	PRESENT
573_1577	Klebsiella pneumoniae	CHS168	USA	LEXS01000000	PATRIC	human			PRESENT	PRESENT	PRESENT	PRESENT	PRESENT	PRESENT	PRESENT	PRESENT	PRESENT
573_1576	Klebsiella pneumoniae	CHS167	USA	LEXR01000000	PATRIC	human			PRESENT	PRESENT	PRESENT	PRESENT	PRESENT	PRESENT	PRESENT	PRESENT	PRESENT
573_1575	Klebsiella pneumoniae	CHS166	USA	LEXQ01000000	PATRIC	human			PRESENT	PRESENT	PRESENT	PRESENT	PRESENT	PRESENT	PRESENT	PRESENT	PRESENT
573_1574	Klebsiella pneumoniae	CHS165	USA	LEXP01000000	PATRIC	human			PRESENT	PRESENT	PRESENT	PRESENT	PRESENT	PRESENT	PRESENT	PRESENT	PRESENT
573_1573	Klebsiella pneumoniae	CHS164	USA	LEXO01000000	PATRIC	human			PRESENT	PRESENT	PRESENT	PRESENT	PRESENT	PRESENT	PRESENT	PRESENT	PRESENT
573_1572	Klebsiella pneumoniae	CHS162	USA	LEXM01000000	PATRIC	human			PRESENT	PRESENT	PRESENT	PRESENT	PRESENT	PRESENT	PRESENT	PRESENT	PRESENT
573_1571	Klebsiella pneumoniae	CHS163	USA	LEXN01000000	PATRIC	human			PRESENT	PRESENT	PRESENT	PRESENT	PRESENT	PRESENT	PRESENT	PRESENT	PRESENT
573_1570	Klebsiella pneumoniae	CHS161	USA	LEXL01000000	PATRIC	human			PRESENT	PRESENT	PRESENT	PRESENT	PRESENT	PRESENT	PRESENT	PRESENT	PRESENT
573_1569	Klebsiella pneumoniae	CHS160	USA	LEXK01000000	PATRIC	human			PRESENT	PRESENT	PRESENT	PRESENT	PRESENT	PRESENT	PRESENT	PRESENT	PRESENT
573_1568	Klebsiella pneumoniae	CHS158	USA	LEXI01000000	PATRIC	human			PRESENT	PRESENT	PRESENT	PRESENT	PRESENT	PRESENT	PRESENT	PRESENT	PRESENT
573_1567	Klebsiella pneumoniae	CHS159	USA	LEXJ01000000	PATRIC	human			PRESENT	PRESENT	PRESENT	PRESENT	PRESENT	PRESENT	PRESENT	PRESENT	PRESENT
573_1566	Klebsiella pneumoniae	CHS157	USA	LEXH01000000	PATRIC	human			PRESENT	PRESENT	PRESENT	PRESENT	PRESENT	PRESENT	PRESENT	PRESENT	PRESENT
573_1565	Klebsiella pneumoniae	CHS155	USA	LEXF01000000	PATRIC	human			PRESENT	PRESENT	PRESENT	PRESENT	PRESENT	PRESENT	PRESENT	PRESENT	PRESENT
573_1564	Klebsiella pneumoniae	CHS156	USA	LEXG01000000	PATRIC	human			PRESENT	PRESENT	PRESENT	PRESENT	PRESENT	PRESENT	PRESENT	PRESENT	PRESENT
573_1563	Klebsiella pneumoniae	CHS154	USA	LEXE01000000	PATRIC	human			PRESENT	PRESENT	PRESENT	PRESENT	PRESENT	PRESENT	PRESENT	PRESENT	PRESENT
573_1562	Klebsiella pneumoniae	CHS152	USA	LEXD01000000	PATRIC	human			PRESENT	PRESENT	PRESENT	PRESENT	PRESENT	PRESENT	PRESENT	PRESENT	PRESENT
573_1561	Klebsiella pneumoniae	CHS151	USA	LEXC01000000	PATRIC	human			PRESENT	PRESENT	PRESENT	PRESENT	PRESENT	PRESENT	PRESENT	PRESENT	PRESENT
573_1560	Klebsiella pneumoniae	CHS149	USA	LEXA01000000	PATRIC	human			PRESENT	PRESENT	PRESENT	PRESENT	PRESENT	PRESENT	PRESENT	PRESENT	PRESENT
573_1559	Klebsiella pneumoniae	CHS150	USA	LEXB01000000	PATRIC	human			PRESENT	PRESENT	PRESENT	PRESENT	PRESENT	PRESENT	PRESENT	PRESENT	PRESENT
573_1558	Klebsiella pneumoniae	CHS148	USA	LEWZ01000000	PATRIC	human			PRESENT	PRESENT	PRESENT	PRESENT	PRESENT	PRESENT	PRESENT	PRESENT	PRESENT
573_1557	Klebsiella pneumoniae	CHS147	USA	LEWY01000000	PATRIC	human			PRESENT	PRESENT	PRESENT	PRESENT	PRESENT	PRESENT	PRESENT	PRESENT	PRESENT
573_1556	Klebsiella pneumoniae	CHS146	USA	LEWX01000000	PATRIC	human			PRESENT	PRESENT	PRESENT	PRESENT	PRESENT	PRESENT	PRESENT	PRESENT	PRESENT
573_1555	Klebsiella pneumoniae	CHS145	USA	LEWW01000000	PATRIC	human			PRESENT	PRESENT	PRESENT	PRESENT	PRESENT	PRESENT	PRESENT	PRESENT	PRESENT
573_1554	Klebsiella pneumoniae	CHS144	USA	LEWV01000000	PATRIC	human			PRESENT	PRESENT	PRESENT	PRESENT	PRESENT	PRESENT	PRESENT	PRESENT	PRESENT
573_1553	Klebsiella pneumoniae	CHS142	USA	LEWU01000000	PATRIC	human			PRESENT	PRESENT	PRESENT	PRESENT	PRESENT	PRESENT	PRESENT	PRESENT	PRESENT
573_1552	Klebsiella pneumoniae	CHS141	USA	LEWT01000000	PATRIC	human			PRESENT	PRESENT	PRESENT	PRESENT	PRESENT	PRESENT	PRESENT	PRESENT	PRESENT
573_1551	Klebsiella pneumoniae	CHS140	USA	LEWS01000000	PATRIC	human			PRESENT	PRESENT	PRESENT	PRESENT	PRESENT	PRESENT	PRESENT	PRESENT	PRESENT
573_1550	Klebsiella pneumoniae	CHS138	USA	LEWQ01000000	PATRIC	human			PRESENT	PRESENT	PRESENT	PRESENT	PRESENT	PRESENT	PRESENT	PRESENT	PRESENT
573_1549	Klebsiella pneumoniae	CHS139	USA	LEWR01000000	PATRIC	human			PRESENT	PRESENT	PRESENT	PRESENT	PRESENT	PRESENT	PRESENT	PRESENT	PRESENT
573_1548	Klebsiella pneumoniae	CHS137	USA	LEWP01000000	PATRIC	human			PRESENT	PRESENT	PRESENT	PRESENT	PRESENT	PRESENT	PRESENT	PRESENT	PRESENT
573_1547	Klebsiella pneumoniae	CHS135	USA	LEWO01000000	PATRIC	human			PRESENT	PRESENT	PRESENT	PRESENT	PRESENT	PRESENT	PRESENT	PRESENT	PRESENT
573_1546	Klebsiella pneumoniae	CHS134	USA	LEWN01000000	PATRIC	human			PRESENT	PRESENT	PRESENT	PRESENT	PRESENT	PRESENT	PRESENT	PRESENT	PRESENT
573_1545	Klebsiella pneumoniae	CHS133	USA	LEWM01000000	PATRIC	human			PRESENT	PRESENT	PRESENT	PRESENT	PRESENT	PRESENT	PRESENT	PRESENT	PRESENT
573_1544	Klebsiella pneumoniae	CHS132	USA	LEWL01000000	PATRIC	human			PRESENT	PRESENT	PRESENT	PRESENT	PRESENT	PRESENT	PRESENT	PRESENT	PRESENT
573_1543	Klebsiella pneumoniae	CHS131	USA	LEWK01000000	PATRIC	human			PRESENT	PRESENT	PRESENT	PRESENT	PRESENT	PRESENT	PRESENT	PRESENT	PRESENT
573_1542	Klebsiella pneumoniae	CHS129	USA	LEWJ01000000	PATRIC	human			PRESENT	PRESENT	PRESENT	PRESENT	PRESENT	PRESENT	PRESENT	PRESENT	PRESENT
573_1541	Klebsiella pneumoniae	CHS128	USA	LEWI01000000	PATRIC	human			PRESENT	PRESENT	PRESENT	PRESENT	PRESENT	PRESENT	PRESENT	PRESENT	PRESENT
573_1540	Klebsiella pneumoniae	CHS127	USA	LEWH01000000	PATRIC	human			PRESENT	PRESENT	PRESENT	PRESENT	PRESENT	PRESENT	PRESENT	PRESENT	PRESENT
573_1539	Klebsiella pneumoniae	CHS125	USA	LEWF01000000	PATRIC	human			PRESENT	PRESENT	PRESENT	PRESENT	PRESENT	PRESENT	PRESENT	PRESENT	PRESENT
573_1538	Klebsiella pneumoniae	CHS126	USA	LEWG01000000	PATRIC	human			PRESENT	PRESENT	PRESENT	PRESENT	PRESENT	PRESENT	PRESENT	PRESENT	PRESENT
573_1537	Klebsiella pneumoniae	CHS123	USA	LEWE01000000	PATRIC	human			PRESENT	PRESENT	PRESENT	PRESENT	PRESENT	PRESENT	PRESENT	PRESENT	PRESENT
573_1536	Klebsiella pneumoniae	CHS122	USA	LEWD01000000	PATRIC	human			PRESENT	PRESENT	PRESENT	PRESENT	PRESENT	PRESENT	PRESENT	PRESENT	PRESENT
573_1535	Klebsiella pneumoniae	CHS121	USA	LEWC01000000	PATRIC	human			PRESENT	PRESENT	PRESENT	PRESENT	PRESENT	PRESENT	PRESENT	PRESENT	PRESENT
573_1534	Klebsiella pneumoniae	CHS118	USA	LEWB01000000	PATRIC	human			PRESENT	PRESENT	PRESENT	PRESENT	PRESENT	PRESENT	PRESENT	PRESENT	PRESENT
573_1533	Klebsiella pneumoniae	CHS117	USA	LEWA01000000	PATRIC	human			PRESENT	PRESENT	PRESENT	PRESENT	PRESENT	PRESENT	PRESENT	PRESENT	PRESENT
573_1532	Klebsiella pneumoniae	CHS116	USA	LEVZ01000000	PATRIC	human			PRESENT	PRESENT	PRESENT	PRESENT	PRESENT	PRESENT	PRESENT	PRESENT	PRESENT
573_1531	Klebsiella pneumoniae	CHS115	USA	LEVY01000000	PATRIC	human			PRESENT	PRESENT	PRESENT	PRESENT	PRESENT	PRESENT	PRESENT	PRESENT	PRESENT
573_1530	Klebsiella pneumoniae	CHS114	USA	LEVX01000000	PATRIC	human			PRESENT	PRESENT	PRESENT	PRESENT	PRESENT	PRESENT	PRESENT	PRESENT	PRESENT
573_1529	Klebsiella pneumoniae	CHS113	USA	LEVW01000000	PATRIC	human			PRESENT	PRESENT	PRESENT	PRESENT	PRESENT	PRESENT	PRESENT	PRESENT	PRESENT
573_1528	Klebsiella pneumoniae	CHS111	USA	LEVU01000000	PATRIC	human			PRESENT	PRESENT	PRESENT	PRESENT	PRESENT	PRESENT	PRESENT	PRESENT	PRESENT
573_1527	Klebsiella pneumoniae	CHS112	USA	LEVV01000000	PATRIC	human			PRESENT	PRESENT	PRESENT	PRESENT	PRESENT	PRESENT	PRESENT	PRESENT	PRESENT
573_1526	Klebsiella pneumoniae	CHS110	USA	LEVT01000000	PATRIC	human			PRESENT	PRESENT	PRESENT	PRESENT	PRESENT	PRESENT	PRESENT	PRESENT	PRESENT
573_1525	Klebsiella pneumoniae	CHS109	USA	LEVS01000000	PATRIC	human			PRESENT	PRESENT	PRESENT	PRESENT	PRESENT	PRESENT	PRESENT	PRESENT	PRESENT
573_1524	Klebsiella pneumoniae	CHS107	USA	LEVR01000000	PATRIC	human			PRESENT	PRESENT	PRESENT	PRESENT	PRESENT	PRESENT	PRESENT	PRESENT	PRESENT
573_1523	Klebsiella pneumoniae	CHS106	USA	LEVQ01000000	PATRIC	human			PRESENT	PRESENT	PRESENT	PRESENT	PRESENT	PRESENT	PRESENT	PRESENT	PRESENT
573_1522	Klebsiella pneumoniae	CHS105	USA	LEVP01000000	PATRIC	human			PRESENT	PRESENT	PRESENT	PRESENT	PRESENT	PRESENT	PRESENT	PRESENT	PRESENT
573_1521	Klebsiella pneumoniae	CHS104	USA	LEVO01000000	PATRIC	human			PRESENT	PRESENT	PRESENT	PRESENT	PRESENT	PRESENT	PRESENT	PRESENT	PRESENT
573_1520	Klebsiella pneumoniae	CHS102	USA	LEVN01000000	PATRIC	human			PRESENT	PRESENT	PRESENT	PRESENT	PRESENT	PRESENT	PRESENT	PRESENT	PRESENT
573_1519	Klebsiella pneumoniae	CHS101	USA	LEVM01000000	PATRIC	human			PRESENT	PRESENT	PRESENT	PRESENT	PRESENT	PRESENT	PRESENT	PRESENT	PRESENT
573_1518	Klebsiella pneumoniae	CHS100	USA	LEVL01000000	PATRIC	human			PRESENT	PRESENT	PRESENT	PRESENT	PRESENT	PRESENT	PRESENT	PRESENT	PRESENT
573_1517	Klebsiella pneumoniae	CHS99	USA	LEVK01000000	PATRIC	human			PRESENT	PRESENT	PRESENT	PRESENT	PRESENT	PRESENT	PRESENT	PRESENT	PRESENT
573_1516	Klebsiella pneumoniae	CHS98	USA	LEVJ01000000	PATRIC	human			PRESENT	PRESENT	PRESENT	PRESENT	PRESENT	PRESENT	PRESENT	PRESENT	PRESENT
573_1515	Klebsiella pneumoniae	CHS97	USA	LEVI01000000	PATRIC	human			PRESENT	PRESENT	PRESENT	PRESENT	PRESENT	PRESENT	PRESENT	PRESENT	PRESENT
573_1514	Klebsiella pneumoniae	CHS96	USA	LEVH01000000	PATRIC	human			PRESENT	PRESENT	PRESENT	PRESENT	PRESENT	PRESENT	PRESENT	PRESENT	PRESENT
573_1513	Klebsiella pneumoniae	CHS95	USA	LEVG01000000	PATRIC	human			PRESENT	PRESENT	PRESENT	PRESENT	PRESENT	PRESENT	PRESENT	PRESENT	PRESENT
573_1512	Klebsiella pneumoniae	CHS94	USA	LEVF01000000	PATRIC	human			PRESENT	PRESENT	PRESENT	PRESENT	PRESENT	PRESENT	PRESENT	PRESENT	PRESENT
573_1511	Klebsiella pneumoniae	CHS93	USA	LEVE01000000	PATRIC	human			PRESENT	PRESENT	PRESENT	PRESENT	PRESENT	PRESENT	PRESENT	PRESENT	PRESENT
573_1510	Klebsiella pneumoniae	CHS92	USA	LEVD01000000	PATRIC	human			PRESENT	PRESENT	PRESENT	PRESENT	PRESENT	PRESENT	PRESENT	PRESENT	PRESENT
573_1509	Klebsiella pneumoniae	CHS91	USA	LEVC01000000	PATRIC	human			PRESENT	PRESENT	PRESENT	PRESENT	PRESENT	PRESENT	PRESENT	PRESENT	PRESENT
573_1508	Klebsiella pneumoniae	CHS90	USA	LEVB01000000	PATRIC	human			PRESENT	PRESENT	PRESENT	PRESENT	PRESENT	PRESENT	PRESENT	PRESENT	PRESENT
573_1507	Klebsiella pneumoniae	CHS89	USA	LEVA01000000	PATRIC	human			PRESENT	PRESENT	PRESENT	PRESENT	PRESENT	PRESENT	PRESENT	PRESENT	PRESENT
573_1506	Klebsiella pneumoniae	CHS88	USA	LEUZ01000000	PATRIC	human			PRESENT	PRESENT	PRESENT	PRESENT	PRESENT	PRESENT	PRESENT	PRESENT	PRESENT
573_1505	Klebsiella pneumoniae	CHS85	USA	LEUY01000000	PATRIC	human			PRESENT	PRESENT	PRESENT	PRESENT	PRESENT	PRESENT	PRESENT	PRESENT	PRESENT
573_1504	Klebsiella pneumoniae	CHS84	USA	LEUX01000000	PATRIC	human			PRESENT	PRESENT	PRESENT	PRESENT	PRESENT	PRESENT	PRESENT	PRESENT	PRESENT
573_1503	Klebsiella pneumoniae	CHS83	USA	LEUW01000000	PATRIC	human			PRESENT	PRESENT	PRESENT	PRESENT	PRESENT	PRESENT	PRESENT	PRESENT	PRESENT
573_1502	Klebsiella pneumoniae	CHS82	USA	LEUV01000000	PATRIC	human			PRESENT	PRESENT	PRESENT	PRESENT	PRESENT	PRESENT	PRESENT	PRESENT	PRESENT
573_1501	Klebsiella pneumoniae	CHS81	USA	LEUU01000000	PATRIC	human			PRESENT	PRESENT	PRESENT	PRESENT	PRESENT	PRESENT	PRESENT	PRESENT	PRESENT
573_1500	Klebsiella pneumoniae	CAV1344	USA	CP011624,CP011623,CP011619,CP011620,CP011621,CP011622	PATRIC	human	infection	2010	PRESENT	PRESENT	PRESENT	PRESENT	PRESENT	PRESENT	PRESENT	PRESENT	PRESENT
573_1499	Klebsiella pneumoniae	CAV1392	USA	CP011578,CP011577,CP011576,CP011575	PATRIC	human	infection	2011	PRESENT	PRESENT	PRESENT	PRESENT	PRESENT	PRESENT	PRESENT	PRESENT	PRESENT
573_1497	Klebsiella pneumoniae	CAV1596	USA	CP011647,CP011643,CP011644,CP011645,CP011646	PATRIC	human		2012	PRESENT	PRESENT	PRESENT	PRESENT	PRESENT	PRESENT	PRESENT	PRESENT	PRESENT
573_1495	Klebsiella variicola	CH4	Malaysia	JSXA01000000	PATRIC	Food			PRESENT	PRESENT	PRESENT	PRESENT	PRESENT	PRESENT	PRESENT	PRESENT	PRESENT
573_1494	Klebsiella variicola	B1	Malaysia	JSWX01000000	PATRIC				PRESENT	PRESENT	PRESENT	PRESENT	PRESENT	PRESENT	PRESENT	PRESENT	PRESENT
573_1493	Klebsiella pneumoniae	yzusk-4	China	CP011421	PATRIC	Food		2007	PRESENT	PRESENT	PRESENT	PRESENT	PRESENT	PRESENT	PRESENT	PRESENT	PRESENT
573_1492	Klebsiella variicola	CICC10011		LBCM01000000	PATRIC				PRESENT	PRESENT	PRESENT	PRESENT	PRESENT	PRESENT	PRESENT	PRESENT	PRESENT
573_1491	Klebsiella pneumoniae	ST-437	USA	LART01000000	PATRIC	human	infection	2014	PRESENT	PRESENT	PRESENT	PRESENT	PRESENT	PRESENT	PRESENT	PRESENT	PRESENT
573_1490	Klebsiella pneumoniae	unknown		CCHB01000000	PATRIC				PRESENT	PRESENT	PRESENT	PRESENT	PRESENT	PRESENT	PRESENT	PRESENT	PRESENT
573_1489	Klebsiella variicola	223/14	Malaysia	JRTV01000000	PATRIC	human	infection	2014	PRESENT	PRESENT	PRESENT	PRESENT	PRESENT	PRESENT	PRESENT	PRESENT	PRESENT
573_1488	Klebsiella pneumoniae	CIP 52.145		FO834906,FO834904,FO834905	PATRIC				PRESENT	PRESENT	PRESENT	PRESENT	PRESENT	PRESENT	PRESENT	PRESENT	PRESENT
573_1487	Klebsiella pneumoniae	CDPH3020	USA	LAFV01000000	PATRIC	human	infection	2014	PRESENT	PRESENT	PRESENT	PRESENT	PRESENT	PRESENT	PRESENT	PRESENT	PRESENT
573_1486	Klebsiella pneumoniae	CDPH5262	USA	LAFU01000000	PATRIC	human	infection	2014	PRESENT	PRESENT	PRESENT	PRESENT	PRESENT	PRESENT	PRESENT	PRESENT	PRESENT
573_1485	Klebsiella pneumoniae	CDPH3707	USA	LAFX01000000	PATRIC	human	infection	2014	PRESENT	PRESENT	PRESENT	PRESENT	PRESENT	PRESENT	PRESENT	PRESENT	PRESENT
573_1484	Klebsiella pneumoniae	CDPH3823	USA	LAFW01000000	PATRIC	human	infection	2014	PRESENT	PRESENT	PRESENT	PRESENT	PRESENT	PRESENT	PRESENT	PRESENT	PRESENT
573_1482	Klebsiella pneumoniae	CDPH3020	USA	JQCW01000000	PATRIC	human	infection	2014	PRESENT	PRESENT	PRESENT	PRESENT	PRESENT	PRESENT	PRESENT	PRESENT	PRESENT
573_1481	Klebsiella pneumoniae	CDPH3707	USA	JQCX01000000	PATRIC	human	infection	2014	PRESENT	PRESENT	PRESENT	PRESENT	PRESENT	PRESENT	PRESENT	PRESENT	PRESENT
573_1480	Klebsiella pneumoniae	DSM 2026	Germany	JYBC01000000	PATRIC			2014	PRESENT	PRESENT	PRESENT	PRESENT	PRESENT	PRESENT	PRESENT	PRESENT	PRESENT
573_1479	Klebsiella pneumoniae	442	Nepal	CDPE01000000	PATRIC	human	infection		PRESENT	PRESENT	PRESENT	PRESENT	PRESENT	PRESENT	PRESENT	PRESENT	PRESENT
573_1478	Klebsiella pneumoniae	98	Nepal	CDQG01000000	PATRIC	human	infection		PRESENT	PRESENT	PRESENT	PRESENT	PRESENT	PRESENT	PRESENT	PRESENT	PRESENT
573_1477	Klebsiella quasipneumoniae subsp. similipneumoniae	1kgm	Malaysia	JXBI01000000	PATRIC	environment		2012	PRESENT	PRESENT	PRESENT	PRESENT	PRESENT	PRESENT	PRESENT	PRESENT	PRESENT
573_1476	Klebsiella pneumoniae	UMNturkey9	USA	JRRF01000000	PATRIC			2012	PRESENT	PRESENT	PRESENT	PRESENT	PRESENT	PRESENT	PRESENT	PRESENT	PRESENT
573_1475	Klebsiella pneumoniae	KPM_nasey	France	CDNA01000000	PATRIC	free-living		2010	PRESENT	PRESENT	PRESENT	PRESENT	PRESENT	PRESENT	PRESENT	PRESENT	PRESENT
573_1474	Klebsiella pneumoniae	unknown		CCIY01000000	PATRIC				PRESENT	PRESENT	PRESENT	PRESENT	PRESENT	PRESENT	PRESENT	PRESENT	PRESENT
573_1473	Klebsiella pneumoniae	unknown		CCIX01000000	PATRIC				PRESENT	PRESENT	PRESENT	PRESENT	PRESENT	PRESENT	PRESENT	PRESENT	PRESENT
573_1472	Klebsiella pneumoniae	unknown		CCIW01000000	PATRIC				PRESENT	PRESENT	PRESENT	PRESENT	PRESENT	PRESENT	PRESENT	PRESENT	PRESENT
573_1471	Klebsiella pneumoniae	unknown		CCIV01000000	PATRIC				PRESENT	PRESENT	PRESENT	PRESENT	PRESENT	PRESENT	PRESENT	PRESENT	PRESENT
573_1470	Klebsiella pneumoniae	unknown		CCIU01000000	PATRIC				PRESENT	PRESENT	PRESENT	PRESENT	PRESENT	PRESENT	PRESENT	PRESENT	PRESENT
573_1469	Klebsiella pneumoniae	unknown		CCIT01000000	PATRIC				PRESENT	PRESENT	PRESENT	PRESENT	PRESENT	PRESENT	PRESENT	PRESENT	PRESENT
573_1468	Klebsiella pneumoniae	unknown		CCIS01000000	PATRIC				PRESENT	PRESENT	PRESENT	CONTIG	PRESENT	PRESENT	PRESENT	ABSENT	PRESENT
573_1467	Klebsiella pneumoniae	unknown		CCIR01000000	PATRIC				PRESENT	PRESENT	PRESENT	PRESENT	PRESENT	PRESENT	PRESENT	PRESENT	PRESENT
573_1466	Klebsiella pneumoniae	unknown		CCIP01000000	PATRIC				PRESENT	PRESENT	PRESENT	PRESENT	PRESENT	PRESENT	PRESENT	PRESENT	PRESENT
573_1465	Klebsiella pneumoniae	unknown		CCIQ01000000	PATRIC				PRESENT	PRESENT	PRESENT	PRESENT	PRESENT	PRESENT	PRESENT	PRESENT	PRESENT
573_1464	Klebsiella pneumoniae	unknown		CCIO01000000	PATRIC				PRESENT	PRESENT	PRESENT	PRESENT	PRESENT	PRESENT	PRESENT	PRESENT	PRESENT
573_1463	Klebsiella pneumoniae	unknown		CCJD01000000	PATRIC				PRESENT	PRESENT	PRESENT	PRESENT	PRESENT	PRESENT	PRESENT	PRESENT	PRESENT
573_1462	Klebsiella pneumoniae	unknown		CCIN01000000	PATRIC				PRESENT	PRESENT	PRESENT	PRESENT	PRESENT	PRESENT	PRESENT	PRESENT	PRESENT
573_1461	Klebsiella pneumoniae	unknown		CCIM01000000	PATRIC				PRESENT	PRESENT	PRESENT	PRESENT	PRESENT	PRESENT	PRESENT	PRESENT	PRESENT
573_1460	Klebsiella pneumoniae	unknown		CCIL01000000	PATRIC				PRESENT	PRESENT	PRESENT	PRESENT	PRESENT	PRESENT	PRESENT	PRESENT	PRESENT
573_1459	Klebsiella pneumoniae	unknown		CCJC01000000	PATRIC				PRESENT	PRESENT	PRESENT	PRESENT	PRESENT	PRESENT	PRESENT	PRESENT	PRESENT
573_1458	Klebsiella pneumoniae	unknown		CCIK01000000	PATRIC				PRESENT	PRESENT	PRESENT	PRESENT	PRESENT	PRESENT	PRESENT	PRESENT	PRESENT
573_1457	Klebsiella pneumoniae	unknown		CCJB01000000	PATRIC				PRESENT	PRESENT	PRESENT	PRESENT	PRESENT	PRESENT	PRESENT	PRESENT	PRESENT
573_1456	Klebsiella pneumoniae	unknown		CCIJ01000000	PATRIC				PRESENT	PRESENT	PRESENT	PRESENT	PRESENT	PRESENT	PRESENT	PRESENT	PRESENT
573_1455	Klebsiella pneumoniae	unknown		CCII01000000	PATRIC				PRESENT	PRESENT	PRESENT	PRESENT	PRESENT	PRESENT	PRESENT	PRESENT	PRESENT
573_1454	Klebsiella pneumoniae	unknown		CCIG01000000	PATRIC				PRESENT	PRESENT	PRESENT	PRESENT	PRESENT	PRESENT	PRESENT	PRESENT	PRESENT
573_1453	Klebsiella pneumoniae	unknown		CCIH01000000	PATRIC				PRESENT	PRESENT	PRESENT	PRESENT	PRESENT	PRESENT	PRESENT	PRESENT	PRESENT
573_1452	Klebsiella pneumoniae	unknown		CCIF01000000	PATRIC				PRESENT	PRESENT	PRESENT	PRESENT	PRESENT	PRESENT	PRESENT	PRESENT	PRESENT
573_1451	Klebsiella pneumoniae	unknown		CCIE01000000	PATRIC				PRESENT	PRESENT	PRESENT	PRESENT	PRESENT	PRESENT	PRESENT	PRESENT	PRESENT
573_1450	Klebsiella pneumoniae	unknown		CCIB01000000	PATRIC				PRESENT	PRESENT	PRESENT	PRESENT	PRESENT	PRESENT	PRESENT	PRESENT	PRESENT
573_1449	Klebsiella pneumoniae	unknown		CCID01000000	PATRIC				PRESENT	PRESENT	PRESENT	PRESENT	PRESENT	PRESENT	PRESENT	PRESENT	PRESENT
573_1448	Klebsiella pneumoniae	unknown		CCIC01000000	PATRIC				PRESENT	PRESENT	PRESENT	PRESENT	PRESENT	PRESENT	PRESENT	PRESENT	PRESENT
573_1447	Klebsiella pneumoniae	unknown		CCIA01000000	PATRIC				PRESENT	PRESENT	PRESENT	PRESENT	PRESENT	PRESENT	PRESENT	CONTIG	PRESENT
573_1446	Klebsiella pneumoniae	unknown		CCHZ01000000	PATRIC				PRESENT	PRESENT	PRESENT	PRESENT	PRESENT	PRESENT	PRESENT	PRESENT	PRESENT
573_1445	Klebsiella pneumoniae	unknown		CCHY01000000	PATRIC				PRESENT	PRESENT	PRESENT	PRESENT	PRESENT	PRESENT	PRESENT	PRESENT	PRESENT
573_1444	Klebsiella pneumoniae	unknown		CCHV01000000	PATRIC				PRESENT	PRESENT	PRESENT	PRESENT	PRESENT	PRESENT	PRESENT	PRESENT	PRESENT
573_1443	Klebsiella pneumoniae	unknown		CCHX01000000	PATRIC				PRESENT	PRESENT	PRESENT	PRESENT	PRESENT	PRESENT	PRESENT	PRESENT	PRESENT
573_1442	Klebsiella pneumoniae	unknown		CCHW01000000	PATRIC				PRESENT	PRESENT	PRESENT	PRESENT	PRESENT	PRESENT	PRESENT	PRESENT	PRESENT
573_1441	Klebsiella pneumoniae	unknown		CCHR01000000	PATRIC				PRESENT	PRESENT	PRESENT	PRESENT	PRESENT	PRESENT	PRESENT	PRESENT	PRESENT
573_1440	Klebsiella pneumoniae	unknown		CCHT01000000	PATRIC				PRESENT	PRESENT	PRESENT	PRESENT	PRESENT	PRESENT	PRESENT	PRESENT	PRESENT
573_1439	Klebsiella pneumoniae	unknown		CCHU01000000	PATRIC				PRESENT	PRESENT	PRESENT	PRESENT	PRESENT	PRESENT	PRESENT	PRESENT	PRESENT
573_1438	Klebsiella pneumoniae	unknown		CCHS01000000	PATRIC				PRESENT	PRESENT	PRESENT	PRESENT	PRESENT	PRESENT	PRESENT	PRESENT	PRESENT
573_1437	Klebsiella pneumoniae	unknown		CCHP01000000	PATRIC				PRESENT	PRESENT	PRESENT	PRESENT	PRESENT	PRESENT	PRESENT	PRESENT	PRESENT
573_1436	Klebsiella pneumoniae	unknown		CCHQ01000000	PATRIC				PRESENT	PRESENT	PRESENT	PRESENT	PRESENT	PRESENT	PRESENT	PRESENT	PRESENT
573_1435	Klebsiella pneumoniae	unknown		CCHO01000000	PATRIC				PRESENT	PRESENT	PRESENT	PRESENT	PRESENT	PRESENT	PRESENT	PRESENT	PRESENT
573_1434	Klebsiella pneumoniae	unknown		CCHN01000000	PATRIC				PRESENT	PRESENT	PRESENT	PRESENT	PRESENT	PRESENT	PRESENT	PRESENT	PRESENT
573_1433	Klebsiella pneumoniae	unknown		CCHL01000000	PATRIC				PRESENT	PRESENT	PRESENT	PRESENT	PRESENT	PRESENT	PRESENT	PRESENT	PRESENT
573_1432	Klebsiella pneumoniae	unknown		CCHM01000000	PATRIC				PRESENT	PRESENT	PRESENT	PRESENT	PRESENT	PRESENT	PRESENT	PRESENT	PRESENT
573_1431	Klebsiella pneumoniae	unknown		CCHK01000000	PATRIC				PRESENT	PRESENT	PRESENT	PRESENT	PRESENT	PRESENT	PRESENT	PRESENT	PRESENT
573_1430	Klebsiella pneumoniae	unknown		CCHJ01000000	PATRIC				PRESENT	PRESENT	PRESENT	PRESENT	PRESENT	PRESENT	PRESENT	PRESENT	PRESENT
573_1429	Klebsiella pneumoniae	unknown		CCHH01000000	PATRIC				PRESENT	PRESENT	PRESENT	PRESENT	PRESENT	PRESENT	PRESENT	PRESENT	PRESENT
573_1428	Klebsiella pneumoniae	unknown		CCHI01000000	PATRIC				PRESENT	PRESENT	PRESENT	PRESENT	PRESENT	PRESENT	PRESENT	PRESENT	PRESENT
573_1427	Klebsiella pneumoniae	unknown		CCHF01000000	PATRIC				PRESENT	PRESENT	PRESENT	PRESENT	PRESENT	PRESENT	PRESENT	PRESENT	PRESENT
573_1426	Klebsiella pneumoniae	unknown		CCHE01000000	PATRIC				PRESENT	PRESENT	PRESENT	PRESENT	PRESENT	PRESENT	PRESENT	PRESENT	PRESENT
573_1425	Klebsiella pneumoniae	unknown		CCHG01000000	PATRIC				PRESENT	PRESENT	PRESENT	PRESENT	PRESENT	PRESENT	PRESENT	PRESENT	PRESENT
573_1424	Klebsiella pneumoniae	unknown		CCHD01000000	PATRIC				PRESENT	PRESENT	PRESENT	PRESENT	PRESENT	PRESENT	PRESENT	PRESENT	PRESENT
573_1422	Klebsiella pneumoniae	unknown		CCHC01000000	PATRIC				PRESENT	PRESENT	PRESENT	PRESENT	PRESENT	PRESENT	PRESENT	PRESENT	PRESENT
573_1421	Klebsiella pneumoniae	unknown		CCGZ01000000	PATRIC				PRESENT	PRESENT	PRESENT	PRESENT	PRESENT	PRESENT	PRESENT	PRESENT	PRESENT
573_1420	Klebsiella pneumoniae	unknown		CCHA01000000	PATRIC				PRESENT	PRESENT	PRESENT	PRESENT	PRESENT	PRESENT	PRESENT	PRESENT	PRESENT
573_1419	Klebsiella pneumoniae	unknown		CCGX01000000	PATRIC				PRESENT	PRESENT	PRESENT	PRESENT	PRESENT	PRESENT	PRESENT	PRESENT	PRESENT
573_1418	Klebsiella pneumoniae	unknown		CCGW01000000	PATRIC				PRESENT	PRESENT	PRESENT	PRESENT	PRESENT	PRESENT	PRESENT	PRESENT	PRESENT
573_1417	Klebsiella pneumoniae	unknown		CCGU01000000	PATRIC				PRESENT	PRESENT	PRESENT	PRESENT	PRESENT	PRESENT	PRESENT	PRESENT	PRESENT
573_1416	Klebsiella pneumoniae	unknown		CCGV01000000	PATRIC				PRESENT	PRESENT	PRESENT	PRESENT	PRESENT	PRESENT	PRESENT	PRESENT	PRESENT
573_1415	Klebsiella pneumoniae	unknown		CCGT01000000	PATRIC				PRESENT	PRESENT	PRESENT	PRESENT	PRESENT	PRESENT	PRESENT	PRESENT	PRESENT
573_1414	Klebsiella pneumoniae	unknown		CCGY01000000	PATRIC				PRESENT	PRESENT	PRESENT	PRESENT	PRESENT	PRESENT	PRESENT	PRESENT	PRESENT
573_1413	Klebsiella pneumoniae	unknown		CCGS01000000	PATRIC				PRESENT	PRESENT	PRESENT	PRESENT	PRESENT	PRESENT	PRESENT	PRESENT	PRESENT
573_1412	Klebsiella pneumoniae	unknown		CCGR01000000	PATRIC				PRESENT	PRESENT	PRESENT	PRESENT	PRESENT	PRESENT	PRESENT	PRESENT	PRESENT
573_1411	Klebsiella pneumoniae	unknown		CCGQ01000000	PATRIC				PRESENT	PRESENT	PRESENT	PRESENT	PRESENT	PRESENT	PRESENT	PRESENT	PRESENT
573_1410	Klebsiella pneumoniae	unknown		CCGO01000000	PATRIC				PRESENT	PRESENT	PRESENT	PRESENT	PRESENT	PRESENT	PRESENT	PRESENT	PRESENT
573_1409	Klebsiella pneumoniae	unknown		CCGP01000000	PATRIC				PRESENT	PRESENT	PRESENT	PRESENT	PRESENT	PRESENT	PRESENT	PRESENT	PRESENT
573_1408	Klebsiella pneumoniae	unknown		CCGN01000000	PATRIC				PRESENT	PRESENT	PRESENT	PRESENT	PRESENT	PRESENT	PRESENT	PRESENT	PRESENT
573_1407	Klebsiella pneumoniae	unknown		CCGM01000000	PATRIC				PRESENT	PRESENT	PRESENT	PRESENT	PRESENT	PRESENT	PRESENT	PRESENT	PRESENT
573_1406	Klebsiella pneumoniae	unknown		CCGL01000000	PATRIC				PRESENT	PRESENT	PRESENT	PRESENT	PRESENT	PRESENT	PRESENT	PRESENT	PRESENT
573_1405	Klebsiella pneumoniae	unknown		CCGJ01000000	PATRIC				PRESENT	PRESENT	PRESENT	PRESENT	PRESENT	PRESENT	PRESENT	PRESENT	PRESENT
573_1404	Klebsiella pneumoniae	unknown		CCGI01000000	PATRIC				PRESENT	PRESENT	PRESENT	PRESENT	PRESENT	PRESENT	PRESENT	PRESENT	PRESENT
573_1403	Klebsiella pneumoniae	unknown		CCGK01000000	PATRIC				PRESENT	PRESENT	PRESENT	PRESENT	PRESENT	PRESENT	PRESENT	PRESENT	PRESENT
573_1402	Klebsiella pneumoniae	unknown		CCGF01000000	PATRIC				PRESENT	PRESENT	PRESENT	PRESENT	PRESENT	PRESENT	PRESENT	PRESENT	ABSENT
573_1401	Klebsiella pneumoniae	unknown		CCGG01000000	PATRIC				PRESENT	PRESENT	PRESENT	PRESENT	PRESENT	PRESENT	PRESENT	PRESENT	PRESENT
573_1400	Klebsiella pneumoniae	unknown		CCJA01000000	PATRIC				PRESENT	PRESENT	PRESENT	PRESENT	PRESENT	PRESENT	PRESENT	PRESENT	PRESENT
573_1399	Klebsiella pneumoniae	unknown		CCGE01000000	PATRIC				PRESENT	PRESENT	PRESENT	PRESENT	PRESENT	PRESENT	PRESENT	PRESENT	PRESENT
573_1398	Klebsiella pneumoniae	unknown		CCGD01000000	PATRIC				PRESENT	PRESENT	PRESENT	PRESENT	PRESENT	PRESENT	PRESENT	PRESENT	PRESENT
573_1397	Klebsiella pneumoniae	unknown		CCGH01000000	PATRIC				PRESENT	PRESENT	PRESENT	PRESENT	PRESENT	PRESENT	PRESENT	PRESENT	PRESENT
573_1396	Klebsiella pneumoniae	unknown		CCGC01000000	PATRIC				PRESENT	CONTIG	PRESENT	PRESENT	PRESENT	PRESENT	PRESENT	CONTIG	PRESENT
573_1395	Klebsiella pneumoniae	unknown		CCFY01000000	PATRIC				PRESENT	PRESENT	PRESENT	PRESENT	PRESENT	PRESENT	PRESENT	PRESENT	PRESENT
573_1394	Klebsiella pneumoniae	unknown		CCGB01000000	PATRIC				PRESENT	PRESENT	PRESENT	PRESENT	PRESENT	PRESENT	PRESENT	PRESENT	PRESENT
573_1393	Klebsiella pneumoniae	unknown		CCFZ01000000	PATRIC				PRESENT	PRESENT	PRESENT	PRESENT	PRESENT	PRESENT	PRESENT	PRESENT	PRESENT
573_1392	Klebsiella pneumoniae	unknown		CCGA01000000	PATRIC				PRESENT	PRESENT	PRESENT	PRESENT	PRESENT	PRESENT	PRESENT	PRESENT	PRESENT
573_1391	Klebsiella pneumoniae	unknown		CCFX01000000	PATRIC				PRESENT	PRESENT	PRESENT	PRESENT	PRESENT	PRESENT	PRESENT	PRESENT	PRESENT
573_1390	Klebsiella pneumoniae	unknown		CCFW01000000	PATRIC				PRESENT	PRESENT	PRESENT	PRESENT	PRESENT	PRESENT	PRESENT	PRESENT	PRESENT
573_1389	Klebsiella pneumoniae	unknown		CCFU01000000	PATRIC				PRESENT	PRESENT	PRESENT	PRESENT	PRESENT	PRESENT	PRESENT	PRESENT	PRESENT
573_1388	Klebsiella pneumoniae	unknown		CCFV01000000	PATRIC				PRESENT	PRESENT	PRESENT	PRESENT	PRESENT	PRESENT	PRESENT	PRESENT	PRESENT
573_1387	Klebsiella pneumoniae	unknown		CCFS01000000	PATRIC				PRESENT	PRESENT	PRESENT	PRESENT	PRESENT	PRESENT	PRESENT	PRESENT	PRESENT
573_1386	Klebsiella pneumoniae	unknown		CCFT01000000	PATRIC				PRESENT	PRESENT	PRESENT	PRESENT	PRESENT	PRESENT	PRESENT	PRESENT	PRESENT
573_1385	Klebsiella pneumoniae	unknown		CCFR01000000	PATRIC				PRESENT	PRESENT	PRESENT	PRESENT	PRESENT	PRESENT	PRESENT	PRESENT	PRESENT
573_1384	Klebsiella pneumoniae	unknown		CCFQ01000000	PATRIC				PRESENT	PRESENT	PRESENT	PRESENT	PRESENT	PRESENT	PRESENT	PRESENT	PRESENT
573_1383	Klebsiella pneumoniae	unknown		CCFP01000000	PATRIC				PRESENT	PRESENT	PRESENT	PRESENT	PRESENT	PRESENT	PRESENT	PRESENT	PRESENT
573_1382	Klebsiella pneumoniae	unknown		CCFO01000000	PATRIC				PRESENT	PRESENT	PRESENT	PRESENT	PRESENT	PRESENT	PRESENT	PRESENT	PRESENT
573_1381	Klebsiella pneumoniae	unknown		CCFN01000000	PATRIC				PRESENT	PRESENT	PRESENT	PRESENT	PRESENT	PRESENT	PRESENT	PRESENT	PRESENT
573_1380	Klebsiella pneumoniae	unknown		CCEY01000000	PATRIC				PRESENT	PRESENT	PRESENT	PRESENT	PRESENT	PRESENT	PRESENT	PRESENT	PRESENT
573_1379	Klebsiella pneumoniae	unknown		CCFM01000000	PATRIC				PRESENT	PRESENT	PRESENT	PRESENT	PRESENT	PRESENT	PRESENT	PRESENT	PRESENT
573_1378	Klebsiella pneumoniae	unknown		CCEX01000000	PATRIC				PRESENT	PRESENT	PRESENT	PRESENT	PRESENT	PRESENT	PRESENT	PRESENT	PRESENT
573_1377	Klebsiella pneumoniae	unknown		CCVM01000000	PATRIC				PRESENT	PRESENT	PRESENT	PRESENT	PRESENT	PRESENT	PRESENT	PRESENT	PRESENT
573_1376	Klebsiella pneumoniae	ST485	Australia	JXCH01000000	PATRIC	human	infection	2014	PRESENT	PRESENT	PRESENT	PRESENT	PRESENT	PRESENT	PRESENT	PRESENT	PRESENT
573_1375	Klebsiella pneumoniae	ST147	Australia	JXBF01000000	PATRIC	human	infection	2012	PRESENT	PRESENT	PRESENT	PRESENT	PRESENT	PRESENT	PRESENT	PRESENT	PRESENT
573_1374	Klebsiella pneumoniae	34618	USA	CP010392,CP010394,CP010393,CP010395,CP010396	PATRIC	human	infection		PRESENT	PRESENT	PRESENT	PRESENT	PRESENT	PRESENT	PRESENT	PRESENT	PRESENT
573_1373	Klebsiella pneumoniae	GN8	Malaysia	JWPY01000000	PATRIC	environment		2014	PRESENT	PRESENT	PRESENT	PRESENT	PRESENT	PRESENT	PRESENT	PRESENT	PRESENT
573_1372	Klebsiella pneumoniae	6234	Colombia	CP010391,CP010390,JWRK01000000	PATRIC	human			PRESENT	PRESENT	PRESENT	PRESENT	PRESENT	PRESENT	PRESENT	PRESENT	PRESENT
573_1371	Klebsiella pneumoniae	38547	USA	CP010388,CP010389,JWRL01000000	PATRIC	human	infection		PRESENT	PRESENT	PRESENT	PRESENT	PRESENT	PRESENT	PRESENT	PRESENT	PRESENT
573_1370	Klebsiella pneumoniae	38544	USA	CP010362,JWRM01000000	PATRIC	human	infection		PRESENT	PRESENT	PRESENT	PRESENT	PRESENT	PRESENT	PRESENT	PRESENT	PRESENT
573_1369	Klebsiella pneumoniae	32192	USA	CP010361,JWRN01000000	PATRIC	human	infection		PRESENT	PRESENT	PRESENT	PRESENT	PRESENT	PRESENT	PRESENT	PRESENT	PRESENT
573_1368	Klebsiella pneumoniae	CCBH13327	Brazil	JSER01000000	PATRIC			2013	PRESENT	PRESENT	PRESENT	PRESENT	PRESENT	PRESENT	PRESENT	PRESENT	PRESENT
573_1367	Klebsiella pneumoniae	4640	USA	JSZL01000000	PATRIC	human	infection		PRESENT	PRESENT	PRESENT	PRESENT	PRESENT	PRESENT	PRESENT	PRESENT	PRESENT
573_1366	Klebsiella pneumoniae	101712	USA	JSZJ01000000	PATRIC	human	infection	2007	PRESENT	PRESENT	PRESENT	PRESENT	PRESENT	PRESENT	PRESENT	PRESENT	PRESENT
573_1365	Klebsiella pneumoniae	101488	USA	JSZK01000000	PATRIC	human	infection	2006	PRESENT	PRESENT	PRESENT	PRESENT	PRESENT	PRESENT	PRESENT	PRESENT	PRESENT
573_1363	Klebsiella pneumoniae	XDR	China	JRGE01000000	PATRIC	human	infection	2013	PRESENT	PRESENT	PRESENT	PRESENT	PRESENT	PRESENT	PRESENT	PRESENT	PRESENT
573_1362	Klebsiella pneumoniae	FDAARGOS_84	USA	JTAX01000000	PATRIC	human	infection	2013	PRESENT	PRESENT	PRESENT	STOPS	PRESENT	PRESENT	PRESENT	PRESENT	PRESENT
573_1361	Klebsiella pneumoniae	XH209	China	CP009461	PATRIC	human	infection	2013	PRESENT	PRESENT	PRESENT	PRESENT	PRESENT	PRESENT	PRESENT	PRESENT	PRESENT
573_1360	Klebsiella pneumoniae	349	Malaysia	JQSE01000000	PATRIC		infection	2013	PRESENT	PRESENT	PRESENT	PRESENT	PRESENT	PRESENT	PRESENT	PRESENT	PRESENT
573_1359	Klebsiella pneumoniae	BAMC 07-18	USA	JRQE01000000	PATRIC	human	infection	2012	PRESENT	PRESENT	PRESENT	PRESENT	PRESENT	PRESENT	PRESENT	PRESENT	PRESENT
573_1357	Klebsiella pneumoniae	CDPH3823	USA	JQDX01000000	PATRIC	human	infection	2014	PRESENT	PRESENT	PRESENT	PRESENT	PRESENT	PRESENT	PRESENT	PRESENT	PRESENT
573_1356	Klebsiella pneumoniae	CDPH5262	USA	JQDY01000000	PATRIC	human	infection	2014	PRESENT	PRESENT	PRESENT	PRESENT	PRESENT	PRESENT	PRESENT	PRESENT	PRESENT
573_1355	Klebsiella pneumoniae	KPPR1		JNFR01000000	PATRIC	human			PRESENT	PRESENT	PRESENT	PRESENT	PRESENT	PRESENT	PRESENT	PRESENT	PRESENT
573_1354	Klebsiella pneumoniae	325	Malaysia	JQGN01000000	PATRIC	human		2013	PRESENT	PRESENT	PRESENT	PRESENT	STOPS	PRESENT	PRESENT	PRESENT	PRESENT
573_1353	Klebsiella pneumoniae	ATCC 13883		JOOW01000000	PATRIC				PRESENT	PRESENT	PRESENT	PRESENT	PRESENT	PRESENT	PRESENT	PRESENT	PRESENT
573_1352	Klebsiella pneumoniae	carbapenem-resistant blaNDM-1	USA	CP009114,CP009116,CP009115	PATRIC	human	infection		PRESENT	PRESENT	PRESENT	PRESENT	PRESENT	PRESENT	PRESENT	PRESENT	PRESENT
573_1351	Klebsiella pneumoniae	MRSN6920	USA	JPGS01000000	PATRIC	human	infection	2012	PRESENT	PRESENT	PRESENT	PRESENT	PRESENT	PRESENT	PRESENT	PRESENT	PRESENT
573_1350	Klebsiella pneumoniae	MRSN8157	USA	JPGT01000000	PATRIC	human		2012	PRESENT	PRESENT	PRESENT	PRESENT	PRESENT	PRESENT	PRESENT	PRESENT	PRESENT
573_1349	Klebsiella pneumoniae	IA565	USA	JPIQ01000000	PATRIC	human	infection	1981	PRESENT	PRESENT	PRESENT	PRESENT	PRESENT	PRESENT	PRESENT	PRESENT	PRESENT
573_1347	Klebsiella pneumoniae	KP_ST11_OXA48	Spain	JNHB01000000	PATRIC	human	infection	2012	PRESENT	PRESENT	PRESENT	PRESENT	PRESENT	PRESENT	PRESENT	PRESENT	PRESENT
573_1346	Klebsiella pneumoniae	Top52 #1721	USA	JNFE01000000	PATRIC		infection		PRESENT	PRESENT	PRESENT	PRESENT	PRESENT	PRESENT	PRESENT	PRESENT	PRESENT
573_1345	Klebsiella pneumoniae	5422	China	JGYH01000000	PATRIC	human		2012	PRESENT	PRESENT	PRESENT	PRESENT	PRESENT	PRESENT	PRESENT	PRESENT	PRESENT
573_1344	Klebsiella pneumoniae	unknown		CCBO010000000	PATRIC				PRESENT	PRESENT	PRESENT	PRESENT	PRESENT	PRESENT	PRESENT	PRESENT	PRESENT
5299_7_9	Klebsiella pneumoniae	1522	Indonesia	ERS012054	Holt et al 2015	Human	invasive	2005	PRESENT	PRESENT	PRESENT	PRESENT	PRESENT	PRESENT	PRESENT	PRESENT	PRESENT
5299_7_8	Klebsiella pneumoniae	2033	Indonesia	ERS012053	Holt et al 2015	Human		2005	PRESENT	PRESENT	PRESENT	PRESENT	PRESENT	PRESENT	PRESENT	PRESENT	PRESENT
5299_7_7	Klebsiella pneumoniae	QMP Z4-716	USA	ERS012052	Holt et al 2015	Bovine	infection	2006	PRESENT	PRESENT	PRESENT	PRESENT	PRESENT	PRESENT	PRESENT	PRESENT	PRESENT
5299_7_6	Klebsiella pneumoniae	2024	Indonesia	ERS012051	Holt et al 2015	Human	invasive	2005	PRESENT	PRESENT	PRESENT	PRESENT	PRESENT	PRESENT	PRESENT	PRESENT	PRESENT
5299_7_5	Klebsiella pneumoniae	1993	Indonesia	ERS012050	Holt et al 2015	Human	invasive	2005	PRESENT	PRESENT	PRESENT	PRESENT	PRESENT	PRESENT	PRESENT	PRESENT	PRESENT
5299_7_4	Klebsiella pneumoniae	1897	Indonesia	ERS012049	Holt et al 2015	Human	invasive	2005	PRESENT	PRESENT	PRESENT	PRESENT	PRESENT	PRESENT	PRESENT	PRESENT	PRESENT
5299_7_3	Klebsiella pneumoniae	1896	Indonesia	ERS012048	Holt et al 2015	Human	invasive	2005	PRESENT	PRESENT	PRESENT	PRESENT	PRESENT	PRESENT	PRESENT	PRESENT	PRESENT
5299_7_2	Klebsiella pneumoniae	1884	Indonesia	ERS012047	Holt et al 2015	Human	invasive	2005	PRESENT	PRESENT	PRESENT	PRESENT	PRESENT	PRESENT	PRESENT	PRESENT	PRESENT
5299_7_10	Klebsiella pneumoniae	TL125	UK	ERS012055	Holt et al 2015	Mouse		2009	PRESENT	PRESENT	PRESENT	PRESENT	PRESENT	PRESENT	PRESENT	PRESENT	PRESENT
5299_7_1	Klebsiella pneumoniae	1824	Indonesia	ERS012046	Holt et al 2015	Human	invasive	2005	PRESENT	PRESENT	PRESENT	PRESENT	PRESENT	PRESENT	PRESENT	PRESENT	PRESENT
5299_1_9	Klebsiella pneumoniae	QMP M1-885	USA	ERS011970	Holt et al 2015	Human	infection	2007	PRESENT	CONTIG	PRESENT	PRESENT	PRESENT	PRESENT	AMBIGUOUS	CONTIG	ABSENT
5299_1_8	Klebsiella pneumoniae	QMP M1-884	USA	ERS011969	Holt et al 2015	Human	infection	2007	PRESENT	PRESENT	PRESENT	PRESENT	PRESENT	PRESENT	PRESENT	PRESENT	PRESENT
5299_1_7	Klebsiella pneumoniae	QMP M1-882	USA	ERS011968	Holt et al 2015	Human	infection	2007	PRESENT	PRESENT	PRESENT	PRESENT	PRESENT	PRESENT	PRESENT	PRESENT	PRESENT
5299_1_5	Klebsiella quasipneumoniae subsp. quasipneumoniae	QMP M1-861	USA	ERS011966	Holt et al 2015	Human	invasive	2006	PRESENT	PARTIAL	PRESENT	PRESENT	PRESENT	STOPS	PARTIAL	CONTIG	CONTIG
5299_1_4	Klebsiella pneumoniae	QMP M1-826	USA	ERS011965	Holt et al 2015	Bovine	infection	2006	PRESENT	PRESENT	PRESENT	PRESENT	PRESENT	PRESENT	PRESENT	PRESENT	PRESENT
5299_1_3	Klebsiella pneumoniae	QMP M1-822	USA	ERS011964	Holt et al 2015	Bovine	infection	2006	PRESENT	PRESENT	PRESENT	PRESENT	PRESENT	PRESENT	PARTIAL	PRESENT	PRESENT
5299_1_2	Klebsiella pneumoniae	QMP M1-821	USA	ERS011963	Holt et al 2015	Bovine	infection	2006	PRESENT	PRESENT	PRESENT	PRESENT	PRESENT	PRESENT	PRESENT	PRESENT	PRESENT
5299_1_12	Klebsiella variicola	QMP M1-888	USA	ERS011973	Holt et al 2015	Human	infection	2007	PRESENT	CONTIG	PRESENT	PRESENT	PRESENT	PRESENT	PRESENT	CONTIG	PRESENT
5299_1_11	Klebsiella pneumoniae	QMP M1-887	USA	ERS011972	Holt et al 2015	Human	infection	2007	PRESENT	PRESENT	PRESENT	PRESENT	PRESENT	PRESENT	PRESENT	PRESENT	PRESENT
5299_1_10	Klebsiella pneumoniae	QMP M1-886	USA	ERS011971	Holt et al 2015	Human	infection	2007	PRESENT	PARTIAL	PRESENT	PRESENT	PRESENT	PRESENT	PRESENT	CONTIG	PRESENT
5299_1_1	Klebsiella pneumoniae	QMP M1-781	USA	ERS011962	Holt et al 2015	Bovine	infection	2006	PRESENT	PARTIAL	PRESENT	PRESENT	PRESENT	PRESENT	PRESENT	CONTIG	PRESENT
5235_8_9	Klebsiella pneumoniae	09-286G	Vietnam	ERS011791	Holt et al 2015	Human		2009	PRESENT	PRESENT	PRESENT	PRESENT	PRESENT	PRESENT	PRESENT	PRESENT	PRESENT
5235_8_8	Klebsiella pneumoniae	71B	Vietnam	ERS011790	Holt et al 2015	Human	infection	2007	PRESENT	PRESENT	PRESENT	PRESENT	PRESENT	PRESENT	PARTIAL	PRESENT	PRESENT
5235_8_7	Klebsiella pneumoniae	QMP B2-090	USA	ERS011789	Holt et al 2015	Bovine	infection	2006	PRESENT	PRESENT	PRESENT	PRESENT	PRESENT	PRESENT	PRESENT	PRESENT	PRESENT
5235_8_6	Klebsiella pneumoniae	08-0116m	Vietnam	ERS011788	Holt et al 2015	Human	invasive	2008	PRESENT	PRESENT	PRESENT	PRESENT	PRESENT	PRESENT	PRESENT	PRESENT	PRESENT
5235_8_5	Klebsiella pneumoniae	24m	Vietnam	ERS011787	Holt et al 2015	Human	invasive	2008	PRESENT	CONTIG	PRESENT	PRESENT	PRESENT	CONTIG	PARTIAL	CONTIG	ABSENT
5235_8_4	Klebsiella pneumoniae	08-0345m	Vietnam	ERS011786	Holt et al 2015	Human	invasive	2008	PRESENT	PRESENT	PRESENT	PRESENT	PRESENT	PRESENT	PRESENT	PRESENT	PRESENT
5235_8_3	Klebsiella pneumoniae	71M	Vietnam	ERS011785	Holt et al 2015	Human	invasive	2008	PRESENT	PARTIAL	PRESENT	PRESENT	PRESENT	PRESENT	PRESENT	CONTIG	PRESENT
5235_8_2	Klebsiella pneumoniae	08-049B	Vietnam	ERS011784	Holt et al 2015	Human	infection	2008	PRESENT	PRESENT	PRESENT	PRESENT	PRESENT	PRESENT	PRESENT	PRESENT	PRESENT
5235_8_10	Klebsiella variicola	08-109P	Vietnam	ERS011792	Holt et al 2015	Human		2008	PRESENT	CONTIG	PRESENT	PRESENT	PRESENT	PRESENT	PRESENT	CONTIG	PRESENT
5235_7_9	Klebsiella pneumoniae	1753	Indonesia	ERS012042	Holt et al 2015	Human	invasive	2005	PRESENT	PRESENT	PRESENT	PRESENT	PRESENT	PRESENT	PRESENT	PRESENT	PRESENT
5235_7_8	Klebsiella pneumoniae	1612	Indonesia	ERS012041	Holt et al 2015	Human	invasive	2005	PRESENT	PRESENT	PRESENT	PRESENT	PRESENT	PRESENT	PRESENT	PRESENT	PRESENT
5235_7_7	Klebsiella pneumoniae	QMP Z4-712	USA	ERS012040	Holt et al 2015	Bovine	infection	2006	PRESENT	PARTIAL	PRESENT	PRESENT	PRESENT	PRESENT	PARTIAL	CONTIG	CONTIG
5235_7_6	Klebsiella pneumoniae	1586	Indonesia	ERS012039	Holt et al 2015	Human	invasive	2005	PRESENT	PARTIAL	PRESENT	PRESENT	PRESENT	PRESENT	PRESENT	PRESENT	PRESENT
5235_7_5	Klebsiella pneumoniae	1585	Indonesia	ERS012038	Holt et al 2015	Human	invasive	2005	PRESENT	PRESENT	PRESENT	PRESENT	PRESENT	PRESENT	PRESENT	PRESENT	PRESENT
5235_7_4	Klebsiella pneumoniae	1576	Indonesia	ERS012037	Holt et al 2015	Human	invasive	2005	PRESENT	PRESENT	PRESENT	PRESENT	PRESENT	PRESENT	PRESENT	PRESENT	PRESENT
5235_7_3	Klebsiella pneumoniae	1557	Indonesia	ERS012036	Holt et al 2015	Human		2005	PRESENT	CONTIG	PRESENT	PARTIAL	PRESENT	PARTIAL	PRESENT	CONTIG	ABSENT
5235_7_2	Klebsiella pneumoniae	1555	Indonesia	ERS012035	Holt et al 2015	Human		2005	PRESENT	PRESENT	PRESENT	PRESENT	PRESENT	PRESENT	PRESENT	PRESENT	PRESENT
5235_7_12	Klebsiella pneumoniae	1789	Indonesia	ERS012045	Holt et al 2015	Human	invasive	2005	PRESENT	PRESENT	PRESENT	PRESENT	PRESENT	PRESENT	PRESENT	PRESENT	PRESENT
5235_7_11	Klebsiella pneumoniae	1765	Indonesia	ERS012044	Holt et al 2015	Human	invasive	2005	PRESENT	PRESENT	PRESENT	PRESENT	PRESENT	PRESENT	PARTIAL	PRESENT	CONTIG
5235_7_10	Klebsiella pneumoniae	1764	Indonesia	ERS012043	Holt et al 2015	Human	invasive	2005	PRESENT	PRESENT	PRESENT	PRESENT	PRESENT	PRESENT	PRESENT	PRESENT	PRESENT
5235_7_1	Klebsiella pneumoniae	1524	Indonesia	ERS012034	Holt et al 2015	Human		2005	PRESENT	PARTIAL	PRESENT	PRESENT	PRESENT	PRESENT	PARTIAL	PRESENT	PRESENT
5235_6_9	Klebsiella pneumoniae	558m	Vietnam	ERS012030	Holt et al 2015	Human	invasive	2009	PRESENT	PRESENT	PRESENT	PRESENT	PRESENT	PRESENT	PRESENT	PRESENT	PRESENT
5235_6_8	Klebsiella pneumoniae	2358m	Vietnam	ERS012029	Holt et al 2015	Human	invasive	2008	PRESENT	CONTIG	PRESENT	PRESENT	PRESENT	PARTIAL	PARTIAL	CONTIG	ABSENT
5235_6_7	Klebsiella pneumoniae	QMP Z4-709	USA	ERS012028	Holt et al 2015	Bovine	infection	2006	PRESENT	PARTIAL	PRESENT	PRESENT	PRESENT	AMBIGUOUS	PARTIAL	PRESENT	ABSENT
5235_6_6	Klebsiella pneumoniae	620m	Vietnam	ERS012027	Holt et al 2015	Human	invasive	2009	PRESENT	CONTIG	PRESENT	PRESENT	PRESENT	PRESENT	STOPS	CONTIG	PRESENT
5235_6_5	Klebsiella pneumoniae	311G	Vietnam	ERS012026	Holt et al 2015	Human		2008	PRESENT	CONTIG	PRESENT	PRESENT	PRESENT	PARTIAL	PRESENT	CONTIG	ABSENT
5235_6_3	Klebsiella pneumoniae	09-2985m	Vietnam	ERS012024	Holt et al 2015	Human	invasive	2009	PRESENT	CONTIG	PRESENT	PRESENT	PRESENT	PRESENT	PARTIAL	CONTIG	PRESENT
5235_6_2	Klebsiella pneumoniae	09-341B	Vietnam	ERS012023	Holt et al 2015	Human	infection	2009	PRESENT	PRESENT	PRESENT	PRESENT	PRESENT	PRESENT	PARTIAL	PRESENT	PRESENT
5235_6_12	Klebsiella pneumoniae	1523	Indonesia	ERS012033	Holt et al 2015	Human	invasive	2005	PRESENT	CONTIG	PRESENT	PRESENT	PRESENT	PRESENT	PARTIAL	CONTIG	PRESENT
5235_6_11	Klebsiella pneumoniae	1517	Indonesia	ERS012032	Holt et al 2015	Human	invasive	2005	PRESENT	PRESENT	PRESENT	PRESENT	PRESENT	PRESENT	PRESENT	PRESENT	PRESENT
5235_6_10	Klebsiella pneumoniae	805m	Vietnam	ERS012031	Holt et al 2015	Human	invasive	2009	PRESENT	PRESENT	PRESENT	PRESENT	PRESENT	PRESENT	PRESENT	PRESENT	PRESENT
5235_6_1	Klebsiella pneumoniae	09-2801m	Vietnam	ERS012022	Holt et al 2015	Human	invasive	2009	PRESENT	PARTIAL	PRESENT	PRESENT	PRESENT	CONTIG	CONTIG	CONTIG	ABSENT
5235_5_8	Klebsiella pneumoniae	09-2072m	Vietnam	ERS012017	Holt et al 2015	Human	invasive	2009	PRESENT	PRESENT	PRESENT	PRESENT	PRESENT	PRESENT	STOPS	PRESENT	PRESENT
5235_5_7	Klebsiella pneumoniae	QMP Z4-697	USA	ERS012016	Holt et al 2015	Bovine	infection	2006	PRESENT	ABSENT	ABSENT	AMBIGUOUS	ABSENT	AMBIGUOUS	ABSENT	ABSENT	ABSENT
5235_5_6	Klebsiella pneumoniae	09-309B	Vietnam	ERS012015	Holt et al 2015	Human	infection	2009	STOPS	PARTIAL	PARTIAL	PRESENT	PRESENT	PRESENT	AMBIGUOUS	ABSENT	ABSENT
5235_5_5	Klebsiella pneumoniae	09-2006m	Vietnam	ERS012014	Holt et al 2015	Human	invasive	2009	PRESENT	PRESENT	PRESENT	PRESENT	PRESENT	PRESENT	PRESENT	PRESENT	PRESENT
5235_5_4	Klebsiella pneumoniae	09-406B	Vietnam	ERS012013	Holt et al 2015	Human	infection	2009	PRESENT	CONTIG	PRESENT	PRESENT	CONTIG	CONTIG	PARTIAL	CONTIG	ABSENT
5235_5_3	Klebsiella pneumoniae	09-400B	Vietnam	ERS012012	Holt et al 2015	Human	infection	2009	PRESENT	PRESENT	PRESENT	PRESENT	PRESENT	PRESENT	PRESENT	PRESENT	PRESENT
5235_5_2	Klebsiella pneumoniae	09-2503m	Vietnam	ERS012011	Holt et al 2015	Human	invasive	2009	PRESENT	PRESENT	PRESENT	PRESENT	PRESENT	PRESENT	PRESENT	PRESENT	PRESENT
5235_5_12	Klebsiella pneumoniae	09-370B	Vietnam	ERS012021	Holt et al 2015	Human	infection	2009	PRESENT	PRESENT	PRESENT	PRESENT	PRESENT	PRESENT	PRESENT	CONTIG	ABSENT
5235_5_11	Klebsiella pneumoniae	09-332B	Vietnam	ERS012020	Holt et al 2015	Human	infection	2009	PRESENT	PRESENT	PRESENT	PRESENT	PRESENT	PRESENT	PRESENT	PRESENT	PRESENT
5235_5_10	Klebsiella quasipneumoniae subsp. similipneumoniae	09-439B	Vietnam	ERS012019	Holt et al 2015	Human		2009	PRESENT	PRESENT	PARTIAL	PRESENT	PRESENT	PRESENT	PRESENT	ABSENT	PRESENT
5235_5_1	Klebsiella quasipneumoniae subsp. quasipneumoniae	QMP Z4-726	USA	ERS012010	Holt et al 2015	Bovine	infection	2006	PRESENT	CONTIG	PRESENT	PRESENT	PRESENT	PRESENT	PARTIAL	CONTIG	CONTIG
5235_3_9	Klebsiella pneumoniae	QMP M1-868	USA	ERS012006	Holt et al 2015	Human	invasive	2006	PRESENT	CONTIG	PRESENT	PRESENT	PRESENT	PRESENT	PRESENT	CONTIG	PRESENT
5235_3_8	Klebsiella pneumoniae	QMP M1-862	USA	ERS012005	Holt et al 2015	Human	invasive	2006	PRESENT	PARTIAL	PRESENT	PRESENT	PRESENT	PRESENT	PRESENT	CONTIG	PRESENT
5235_3_7	Klebsiella pneumoniae	QMP M2-684	USA	ERS012004	Holt et al 2015	Bovine	carriage	2007	PRESENT	PRESENT	PRESENT	PRESENT	PRESENT	PRESENT	PRESENT	PRESENT	PRESENT
5235_3_6	Klebsiella pneumoniae	QMP M1-860	USA	ERS012003	Holt et al 2015	Human	infection	2006	STOPS	PARTIAL	PRESENT	PARTIAL	PRESENT	PRESENT	PRESENT	ABSENT	PRESENT
5235_3_5	Klebsiella pneumoniae	QMP M1-776	USA	ERS012002	Holt et al 2015	Human	invasive	2006	PRESENT	PRESENT	PRESENT	PRESENT	PRESENT	PRESENT	PRESENT	PRESENT	PRESENT
5235_3_4	Klebsiella pneumoniae	QMP M2-654	USA	ERS012001	Holt et al 2015	Bovine	carriage	2007	PRESENT	PRESENT	PRESENT	PRESENT	PRESENT	PRESENT	PRESENT	PRESENT	PRESENT
5235_3_2	Klebsiella pneumoniae	QMP M2-488	USA	ERS011999	Holt et al 2015	Bovine	carriage	2007	PRESENT	PRESENT	PRESENT	PRESENT	PRESENT	PRESENT	PRESENT	PRESENT	PRESENT
5235_3_12	Klebsiella pneumoniae	QMP Z4-724	USA	ERS012009	Holt et al 2015	Bovine	infection	2006	PRESENT	PRESENT	PRESENT	PRESENT	PRESENT	PRESENT	PRESENT	PRESENT	PRESENT
5235_3_11	Klebsiella pneumoniae	QMP Z4-702	USA	ERS012008	Holt et al 2015	Bovine	infection	2006	PRESENT	PRESENT	PRESENT	PRESENT	PRESENT	PRESENT	PRESENT	PRESENT	PRESENT
5235_3_1	Klebsiella pneumoniae	QMP M2-484	USA	ERS011998	Holt et al 2015	Bovine	carriage	2007	PRESENT	PARTIAL	PRESENT	PRESENT	PRESENT	PRESENT	PRESENT	CONTIG	PRESENT
5235_2_8	Klebsiella pneumoniae	QMP M2-389	USA	ERS011993	Holt et al 2015	Bovine	carriage	2007	PRESENT	PRESENT	PRESENT	PRESENT	PRESENT	AMBIGUOUS	AMBIGUOUS	PRESENT	ABSENT
5235_2_7	Klebsiella pneumoniae	QMP M1-414	USA	ERS011992	Holt et al 2015	Environmental		2005	PRESENT	PARTIAL	PRESENT	PRESENT	PRESENT	STOPS	PRESENT	CONTIG	ABSENT
5235_2_6	Klebsiella pneumoniae	QMP M1-029	USA	ERS011991	Holt et al 2015	Bovine	carriage	2005	PRESENT	CONTIG	PRESENT	PRESENT	PRESENT	PRESENT	PARTIAL	CONTIG	PRESENT
5235_2_5	Klebsiella pneumoniae	QMP M1-980	USA	ERS011990	Holt et al 2015	Human		2007	PRESENT	PARTIAL	PRESENT	PRESENT	CONTIG	CONTIG	AMBIGUOUS	CONTIG	ABSENT
5235_2_4	Klebsiella quasipneumoniae subsp. similipneumoniae	QMP M1-977	USA	ERS011989	Holt et al 2015	Human		2007	PRESENT	PRESENT	PRESENT	PRESENT	PRESENT	PRESENT	STOPS	PRESENT	CONTIG
5235_2_3	Klebsiella pneumoniae	QMP M1-975	USA	ERS011988	Holt et al 2015	Human	carriage	2007	PRESENT	PRESENT	PRESENT	PRESENT	PRESENT	PRESENT	PRESENT	PRESENT	PRESENT
5235_2_2	Klebsiella pneumoniae	QMP M1-974	USA	ERS011987	Holt et al 2015	Human	carriage	2007	PRESENT	PRESENT	PRESENT	PRESENT	PRESENT	PRESENT	PRESENT	PRESENT	PRESENT
5235_2_12	Klebsiella pneumoniae	QMP M1-418	USA	ERS011997	Holt et al 2015	Environmental		2005	PRESENT	PARTIAL	PRESENT	STOPS	PRESENT	STOPS	PARTIAL	CONTIG	ABSENT
5235_2_11	Klebsiella pneumoniae	QMP M1-407	USA	ERS011996	Holt et al 2015	Environmental		2005	PRESENT	PRESENT	PRESENT	PRESENT	PRESENT	PRESENT	PRESENT	PRESENT	PRESENT
5235_2_1	Klebsiella pneumoniae	QMP M1-972	USA	ERS011986	Holt et al 2015	Human		2007	PRESENT	PRESENT	PRESENT	PRESENT	PRESENT	PRESENT	PRESENT	PRESENT	PRESENT
5235_1_9	Klebsiella pneumoniae	QMP M1-965	USA	ERS011982	Holt et al 2015	Human		2007	PRESENT	PARTIAL	PRESENT	PRESENT	PRESENT	PRESENT	PRESENT	CONTIG	PRESENT
5235_1_8	Klebsiella pneumoniae	QMP M1-964	USA	ERS011981	Holt et al 2015	Human		2007	PRESENT	PARTIAL	PRESENT	PRESENT	PRESENT	STOPS	PARTIAL	CONTIG	ABSENT
5235_1_7	Klebsiella pneumoniae	QMP M1-963	USA	ERS011980	Holt et al 2015	Human	carriage	2007	PRESENT	PARTIAL	PRESENT	PRESENT	PRESENT	PRESENT	PRESENT	CONTIG	PRESENT
5235_1_6	Klebsiella pneumoniae	QMP M1-896	USA	ERS011979	Holt et al 2015	Human	infection	2007	PRESENT	PARTIAL	PRESENT	PRESENT	PRESENT	STOPS	PARTIAL	CONTIG	PRESENT
5235_1_5	Klebsiella pneumoniae	QMP M1-895	USA	ERS011978	Holt et al 2015	Human	infection	2007	PRESENT	PARTIAL	PRESENT	PRESENT	PRESENT	PRESENT	PARTIAL	PRESENT	PRESENT
5235_1_4	Klebsiella variicola	QMP M1-893	USA	ERS011977	Holt et al 2015	Human	infection	2007	PRESENT	PRESENT	PRESENT	PRESENT	PRESENT	PRESENT	PRESENT	PRESENT	PRESENT
5235_1_3	Klebsiella pneumoniae	QMP M1-892	USA	ERS011976	Holt et al 2015	Human	infection	2007	PRESENT	AMBIGUOUS	PRESENT	PRESENT	PRESENT	AMBIGUOUS	PARTIAL	PRESENT	ABSENT
5235_1_2	Klebsiella pneumoniae	QMP M1-891	USA	ERS011975	Holt et al 2015	Human	infection	2007	PRESENT	PRESENT	PRESENT	PRESENT	PRESENT	PRESENT	PARTIAL	PRESENT	PRESENT
5235_1_12	Klebsiella pneumoniae	QMP M1-970	USA	ERS011985	Holt et al 2015	Human		2007	CONTIG	AMBIGUOUS	PRESENT	CONTIG	PRESENT	CONTIG	PARTIAL	ABSENT	ABSENT
5235_1_11	Klebsiella pneumoniae	QMP M1-968	USA	ERS011984	Holt et al 2015	Human	carriage	2007	PRESENT	CONTIG	PRESENT	PRESENT	PRESENT	PRESENT	PARTIAL	CONTIG	PRESENT
5235_1_10	Klebsiella pneumoniae	QMP M1-967	USA	ERS011983	Holt et al 2015	Human		2007	PRESENT	PARTIAL	PRESENT	PRESENT	PRESENT	PRESENT	PARTIAL	CONTIG	CONTIG
5235_1_1	Klebsiella pneumoniae	QMP M1-889	USA	ERS011974	Holt et al 2015	Human	infection	2007	CONTIG	PARTIAL	PRESENT	CONTIG	PRESENT	AMBIGUOUS	STOPS	ABSENT	ABSENT
5197_8_9	Klebsiella pneumoniae	UI 12780	Laos	ERS011898	Holt et al 2015	Human	invasive	2008	PRESENT	PRESENT	PRESENT	PRESENT	PRESENT	PRESENT	PRESENT	PRESENT	PRESENT
5197_8_8	Klebsiella pneumoniae	ST 752	Laos	ERS011897	Holt et al 2015	Human	invasive	2008	PRESENT	PRESENT	PRESENT	PRESENT	PRESENT	PRESENT	PRESENT	PRESENT	PRESENT
5197_8_7	Klebsiella pneumoniae	QMP B2-282	USA	ERS011896	Holt et al 2015	Bovine	carriage	2006	PRESENT	PRESENT	PRESENT	PRESENT	PRESENT	PRESENT	PRESENT	PRESENT	PRESENT
5197_8_6	Klebsiella pneumoniae	UI 10871	Laos	ERS011895	Holt et al 2015	Human	invasive	2007	PRESENT	PRESENT	PRESENT	PRESENT	PRESENT	PRESENT	PRESENT	PRESENT	PRESENT
5197_8_5	Klebsiella quasipneumoniae subsp. similipneumoniae	UI 9552	Laos	ERS011894	Holt et al 2015	Human		2007	PRESENT	PRESENT	PRESENT	PRESENT	PRESENT	PRESENT	PRESENT	PRESENT	PRESENT
5197_8_4	Klebsiella pneumoniae	UI 8601	Laos	ERS011893	Holt et al 2015	Human	invasive	2006	PRESENT	PRESENT	PRESENT	PRESENT	PRESENT	PRESENT	PRESENT	PRESENT	PRESENT
5197_8_3	Klebsiella quasipneumoniae subsp. similipneumoniae	UI 7631	Laos	ERS011892	Holt et al 2015	Human		2006	PRESENT	PRESENT	PRESENT	PRESENT	PRESENT	PRESENT	PRESENT	PRESENT	PRESENT
5197_8_2	Klebsiella pneumoniae	UI 6717	Laos	ERS011891	Holt et al 2015	Human	invasive	2005	PRESENT	PRESENT	PRESENT	PRESENT	PRESENT	PRESENT	PRESENT	PRESENT	PRESENT
5197_8_12	Klebsiella pneumoniae	UI 15398	Laos	ERS011901	Holt et al 2015	Human	invasive	2009	PRESENT	PRESENT	PRESENT	PRESENT	PRESENT	PRESENT	PRESENT	PRESENT	PRESENT
5197_8_11	Klebsiella pneumoniae	UI 14245	Laos	ERS011900	Holt et al 2015	Human	invasive		PRESENT	PRESENT	PRESENT	PRESENT	PRESENT	PRESENT	PRESENT	PRESENT	PRESENT
5197_8_1	Klebsiella pneumoniae	UI 6167	Laos	ERS011890	Holt et al 2015	Human	invasive	2005	PRESENT	PRESENT	PRESENT	PRESENT	PRESENT	PRESENT	PRESENT	PRESENT	PRESENT
5197_7_8	Klebsiella pneumoniae	Pus 15987	Laos	ERS011873	Holt et al 2015	Human	infection	2009	PRESENT	PRESENT	PRESENT	PRESENT	PRESENT	PRESENT	PRESENT	PRESENT	PRESENT
5197_7_7	Klebsiella pneumoniae	QMP B2-248	USA	ERS011872	Holt et al 2015	Bovine	carriage	2006	PRESENT	PRESENT	PRESENT	PRESENT	PRESENT	PRESENT	PRESENT	PRESENT	PRESENT
5197_7_6	Klebsiella pneumoniae	Pus 15007	Laos	ERS011871	Holt et al 2015	Human	invasive	2009	PRESENT	PRESENT	PRESENT	PRESENT	PRESENT	PRESENT	PRESENT	PRESENT	PRESENT
5197_7_5	Klebsiella variicola	Pus 13542	Laos	ERS011870	Holt et al 2015	Human	invasive	2009	PRESENT	PRESENT	PRESENT	PRESENT	PRESENT	PRESENT	PRESENT	PRESENT	PRESENT
5197_7_4	Klebsiella pneumoniae	LF 7160	Laos	ERS011869	Holt et al 2015	Human	invasive	2007	PRESENT	PRESENT	PRESENT	PRESENT	PRESENT	PRESENT	PRESENT	PRESENT	PRESENT
5197_7_3	Klebsiella pneumoniae	Pus 9314/2	Laos	ERS011868	Holt et al 2015	Human	invasive	2008	PRESENT	PRESENT	PRESENT	PRESENT	PRESENT	PRESENT	PRESENT	PRESENT	PRESENT
5197_7_2	Klebsiella pneumoniae	Pus 4878	Laos	ERS011867	Holt et al 2015	Human	invasive	2007	PRESENT	PRESENT	PRESENT	PRESENT	PRESENT	PRESENT	PRESENT	PRESENT	PRESENT
5197_7_1	Klebsiella pneumoniae	AF 3927	Laos	ERS011866	Holt et al 2015	Human	invasive	2006	PRESENT	PRESENT	PRESENT	PRESENT	PRESENT	PRESENT	PRESENT	PRESENT	PRESENT
5197_2_9	Klebsiella pneumoniae	K242An	Vietnam	ERS011826	Holt et al 2015	Human	carriage	2005	PRESENT	PRESENT	PRESENT	PRESENT	PRESENT	PRESENT	PRESENT	PRESENT	PRESENT
5197_2_8	Klebsiella pneumoniae	K231An	Vietnam	ERS011824	Holt et al 2015	Human	carriage	2005	PRESENT	PRESENT	PRESENT	PRESENT	PRESENT	PRESENT	PRESENT	PRESENT	PRESENT
5197_2_7	Klebsiella pneumoniae	QMP B2-211	USA	ERS011825	Holt et al 2015	Bovine	infection	2006	PRESENT	CONTIG	PRESENT	PRESENT	PRESENT	PRESENT	PRESENT	CONTIG	PRESENT
5197_2_6	Klebsiella pneumoniae	K228An	Vietnam	ERS011823	Holt et al 2015	Human	carriage	2005	PRESENT	PRESENT	PRESENT	PRESENT	PRESENT	PRESENT	PRESENT	PRESENT	PRESENT
5197_2_5	Klebsiella quasipneumoniae subsp. similipneumoniae	K222Ca	Vietnam	ERS011822	Holt et al 2015	Human		2005	PRESENT	PRESENT	PRESENT	PRESENT	PRESENT	PRESENT	PRESENT	PRESENT	PRESENT
5197_2_4	Klebsiella quasipneumoniae subsp. similipneumoniae	K215Ax	Vietnam	ERS011821	Holt et al 2015	Human		2005	PRESENT	PRESENT	PRESENT	PRESENT	PRESENT	PRESENT	PRESENT	PRESENT	PRESENT
5197_2_3	Klebsiella pneumoniae	K113N	Vietnam	ERS011820	Holt et al 2015	Human	carriage	2004	PRESENT	PRESENT	PRESENT	PRESENT	PRESENT	PRESENT	PRESENT	PRESENT	PRESENT
5197_2_2	Klebsiella pneumoniae	K102An	Vietnam	ERS011819	Holt et al 2015	Human	carriage	2004	PRESENT	PRESENT	PRESENT	PRESENT	PRESENT	PRESENT	PRESENT	PRESENT	PRESENT
5197_2_12	Klebsiella quasipneumoniae subsp. similipneumoniae	K263An	Vietnam	ERS011829	Holt et al 2015	Human		2005	PRESENT	PRESENT	PRESENT	PRESENT	PRESENT	PRESENT	PRESENT	PRESENT	PRESENT
5197_2_11	Klebsiella pneumoniae	K262N	Vietnam	ERS011828	Holt et al 2015	Human	carriage	2005	PRESENT	PRESENT	PRESENT	PRESENT	PRESENT	PRESENT	PRESENT	PRESENT	PRESENT
5197_2_10	Klebsiella pneumoniae	K261An	Vietnam	ERS011827	Holt et al 2015	Human	carriage	2005	PRESENT	PRESENT	PRESENT	PRESENT	PRESENT	PRESENT	PRESENT	PRESENT	PRESENT
5197_2_1	Klebsiella pneumoniae	K86N	Vietnam	ERS011818	Holt et al 2015	Human	carriage	2004	PRESENT	PRESENT	PRESENT	PRESENT	PRESENT	PRESENT	PRESENT	PRESENT	PRESENT
5193_8_9	Klebsiella quasipneumoniae subsp. similipneumoniae	DU35427/05	Singapore	ERS011910	Holt et al 2015	Human		2005	PRESENT	PRESENT	PRESENT	PRESENT	PRESENT	PRESENT	PRESENT	PRESENT	PRESENT
5193_8_8	Klebsiella pneumoniae	DU33062/05	Singapore	ERS011909	Holt et al 2015	Human	carriage	2005	PRESENT	PRESENT	PRESENT	PRESENT	PRESENT	PRESENT	PRESENT	PRESENT	PRESENT
5193_8_7	Klebsiella variicola	QMP B2-288	USA	ERS011908	Holt et al 2015	Bovine	carriage	2006	PRESENT	PRESENT	PRESENT	PRESENT	PRESENT	PRESENT	PRESENT	PRESENT	PRESENT
5193_8_6	Klebsiella pneumoniae	DU10252/04	Singapore	ERS011907	Holt et al 2015	Human	infection	2004	PRESENT	PRESENT	PRESENT	PRESENT	PRESENT	PRESENT	PRESENT	PRESENT	PRESENT
5193_8_5	Klebsiella pneumoniae	DR5092/05	Singapore	ERS011906	Holt et al 2015	Human	carriage	2005	PRESENT	PRESENT	PRESENT	PRESENT	PRESENT	PRESENT	PRESENT	PRESENT	PRESENT
5193_8_4	Klebsiella pneumoniae	DB11802/05	Singapore	ERS011905	Holt et al 2015	Human	invasive	2005	PRESENT	PRESENT	PRESENT	PRESENT	PRESENT	PRESENT	PRESENT	PRESENT	PRESENT
5193_8_3	Klebsiella pneumoniae	DU4033/04	Singapore	ERS011904	Holt et al 2015	Human	infection	2004	PRESENT	PRESENT	PRESENT	PRESENT	PRESENT	PRESENT	PRESENT	PRESENT	PRESENT
5193_8_2	Klebsiella pneumoniae	DB44834/96	Singapore	ERS011903	Holt et al 2015	Human	invasive	1996	PRESENT	PRESENT	PRESENT	PRESENT	PRESENT	PRESENT	PRESENT	PRESENT	PRESENT
5193_8_12	Klebsiella pneumoniae	DR19891/02	Singapore	ERS011913	Holt et al 2015	Human	invasive	2002	PRESENT	PRESENT	PRESENT	PRESENT	STOPS	STOPS	PRESENT	PRESENT	PRESENT
5193_8_11	Klebsiella pneumoniae	DM1159/01	Singapore	ERS011912	Holt et al 2015	Human	invasive	2001	PRESENT	PRESENT	PRESENT	PRESENT	PRESENT	PRESENT	PRESENT	PRESENT	PRESENT
5193_8_10	Klebsiella pneumoniae	DU38032/05	Singapore	ERS011911	Holt et al 2015	Human	infection	2005	PRESENT	PRESENT	PRESENT	PRESENT	PRESENT	PRESENT	PRESENT	PRESENT	PRESENT
5193_8_1	Klebsiella pneumoniae	DM23092/04	Singapore	ERS011902	Holt et al 2015	Human	infection	2004	PRESENT	PRESENT	PRESENT	PRESENT	PRESENT	PRESENT	PRESENT	PRESENT	PRESENT
5193_7_9	Klebsiella pneumoniae	UI 3324	Laos	ERS011886	Holt et al 2015	Human	invasive	2003	PRESENT	PRESENT	PRESENT	PRESENT	PRESENT	PRESENT	PRESENT	PRESENT	PRESENT
5193_7_8	Klebsiella quasipneumoniae subsp. similipneumoniae	UI 2877	Laos	ERS011885	Holt et al 2015	Human		2002	PRESENT	PRESENT	PRESENT	PRESENT	PRESENT	PRESENT	PRESENT	PRESENT	PRESENT
5193_7_7	Klebsiella pneumoniae	QMP B2-252	USA	ERS011884	Holt et al 2015	Bovine	carriage	2006	PRESENT	PRESENT	PRESENT	PRESENT	PRESENT	PRESENT	PRESENT	PRESENT	PRESENT
5193_7_6	Klebsiella pneumoniae	UI 2213	Laos	ERS011883	Holt et al 2015	Human	invasive	2002	PRESENT	PRESENT	PRESENT	PRESENT	PRESENT	PRESENT	PRESENT	PRESENT	PRESENT
5193_7_5	Klebsiella pneumoniae	UI 522	Laos	ERS011882	Holt et al 2015	Human	invasive	2000	PRESENT	PRESENT	PRESENT	PRESENT	PRESENT	PRESENT	PRESENT	PRESENT	PRESENT
5193_7_3	Klebsiella pneumoniae	U 16821	Laos	ERS011880	Holt et al 2015	Human	infection	2009	PRESENT	PRESENT	PRESENT	PRESENT	PRESENT	PRESENT	PRESENT	PRESENT	PRESENT
5193_7_2	Klebsiella pneumoniae	U 13792/2	Laos	ERS011879	Holt et al 2015	Human	infection	2009	PRESENT	PRESENT	PRESENT	PRESENT	PRESENT	PRESENT	PRESENT	PRESENT	PRESENT
5193_7_11	Klebsiella pneumoniae	UI 4650	Laos	ERS011888	Holt et al 2015	Human	invasive		PRESENT	PRESENT	PRESENT	PRESENT	PRESENT	PRESENT	PRESENT	PRESENT	PRESENT
5193_7_10	Klebsiella quasipneumoniae subsp. similipneumoniae	UI 4256	Laos	ERS011887	Holt et al 2015	Human		2003	PRESENT	PRESENT	PRESENT	PRESENT	PRESENT	PRESENT	PRESENT	PRESENT	PRESENT
5193_7_1	Klebsiella pneumoniae	U 12567	Laos	ERS011878	Holt et al 2015	Human	infection	2008	PRESENT	PRESENT	PRESENT	PRESENT	PRESENT	PRESENT	PRESENT	PRESENT	PRESENT
5193_6_9	Klebsiella pneumoniae	7085	USA	ERS011862	Holt et al 2015	Monkey		2009	PRESENT	PRESENT	PRESENT	PRESENT	PRESENT	PRESENT	PRESENT	PRESENT	PRESENT
5193_6_8	Klebsiella pneumoniae	206535	USA	ERS011861	Holt et al 2015	Monkey		2008	PRESENT	PRESENT	PRESENT	PRESENT	PRESENT	PRESENT	PRESENT	PRESENT	PRESENT
5193_6_7	Klebsiella pneumoniae	QMP B2-228	USA	ERS011860	Holt et al 2015	Bovine	infection	2006	PRESENT	PRESENT	PRESENT	PRESENT	PRESENT	PRESENT	PRESENT	PRESENT	PRESENT
5193_6_6	Klebsiella pneumoniae	MM50237	USA	ERS011859	Holt et al 2015	Monkey		2008	PRESENT	PRESENT	PRESENT	PRESENT	PRESENT	PRESENT	PRESENT	PRESENT	PRESENT
5193_6_5	Klebsiella pneumoniae	KpV513	USA	ERS011858	Holt et al 2015	Monkey		2006	PRESENT	PRESENT	PRESENT	PRESENT	PRESENT	PRESENT	PRESENT	PRESENT	PRESENT
5193_6_4	Klebsiella pneumoniae	EW-85-R-MAN	Vietnam	ERS011857	Holt et al 2015	Human	carriage	2006	PRESENT	PRESENT	PRESENT	PRESENT	PRESENT	PRESENT	PRESENT	PRESENT	PRESENT
5193_6_3	Klebsiella pneumoniae	EW-68-R-MAC-1	Vietnam	ERS011856	Holt et al 2015	Human	carriage	2006	PRESENT	PRESENT	PRESENT	PRESENT	PRESENT	PRESENT	PRESENT	PRESENT	PRESENT
5193_6_2	Klebsiella pneumoniae	EW-67-R-MAC	Vietnam	ERS011855	Holt et al 2015	Human	carriage	2006	PRESENT	PRESENT	PRESENT	PRESENT	PRESENT	PRESENT	PRESENT	PRESENT	PRESENT
5193_6_12	Klebsiella pneumoniae	85997	USA	ERS011865	Holt et al 2015	Sea mammal		2008	PRESENT	PRESENT	PRESENT	PRESENT	PRESENT	PRESENT	PRESENT	PRESENT	PRESENT
5193_6_11	Klebsiella pneumoniae	812079	USA	ERS011864	Holt et al 2015	Sea mammal		2008	PRESENT	PRESENT	PRESENT	PRESENT	PRESENT	PRESENT	PRESENT	PRESENT	PRESENT
5193_6_10	Klebsiella pneumoniae	Kp-Miami	USA	ERS011863	Holt et al 2015	Human	invasive	2008	PRESENT	PRESENT	PRESENT	PRESENT	PRESENT	PRESENT	PRESENT	PRESENT	PRESENT
5193_6_1	Klebsiella quasipneumoniae subsp. similipneumoniae	EW-60-R-MAG-2	Vietnam	ERS011854	Holt et al 2015	Human		2006	PRESENT	PRESENT	PRESENT	PRESENT	PRESENT	PRESENT	PRESENT	PRESENT	PRESENT
5193_5_9	Klebsiella pneumoniae	EW-20-R-MAC-1	Vietnam	ERS011850	Holt et al 2015	Human	carriage	2006	PRESENT	PRESENT	PRESENT	PRESENT	PRESENT	PRESENT	PRESENT	PRESENT	PRESENT
5193_5_8	Klebsiella pneumoniae	EW-20-R-MAG-1	Vietnam	ERS011849	Holt et al 2015	Human	carriage	2006	PRESENT	PRESENT	PRESENT	PRESENT	PRESENT	PRESENT	PRESENT	PRESENT	PRESENT
5193_5_7	Klebsiella pneumoniae	QMP B2-223	USA	ERS011848	Holt et al 2015	Bovine	infection	2006	PRESENT	PRESENT	PRESENT	PRESENT	PRESENT	PRESENT	PRESENT	PRESENT	PRESENT
5193_5_6	Klebsiella quasipneumoniae subsp. similipneumoniae	073-CN-2	Vietnam	ERS011847	Holt et al 2015	Human		2007	PRESENT	PRESENT	PRESENT	PRESENT	PRESENT	PRESENT	PRESENT	PRESENT	PRESENT
5193_5_4	Klebsiella quasipneumoniae subsp. similipneumoniae	033-CAZ-1	Vietnam	ERS011845	Holt et al 2015	Human		2007	PRESENT	PRESENT	PRESENT	PRESENT	PRESENT	PRESENT	PRESENT	PRESENT	PRESENT
5193_5_2	Klebsiella pneumoniae	015-CN-2	Vietnam	ERS011843	Holt et al 2015	Human	carriage	2007	PRESENT	PRESENT	PRESENT	PRESENT	PRESENT	PRESENT	PRESENT	PRESENT	PRESENT
5193_5_12	Klebsiella pneumoniae	EW-44-R-MAG-1	Vietnam	ERS011853	Holt et al 2015	Human	carriage	2006	PRESENT	PRESENT	PRESENT	PRESENT	PRESENT	PRESENT	PRESENT	PRESENT	PRESENT
5193_5_11	Klebsiella pneumoniae	EW-33-R-MAC-2	Vietnam	ERS011852	Holt et al 2015	Human	carriage	2006	PRESENT	PRESENT	PRESENT	PRESENT	PRESENT	PRESENT	PRESENT	PRESENT	PRESENT
5193_5_10	Klebsiella pneumoniae	EW-29-R-MAG	Vietnam	ERS011851	Holt et al 2015	Human	carriage	2006	PRESENT	PRESENT	PRESENT	PRESENT	PRESENT	PRESENT	PRESENT	PRESENT	PRESENT
5193_5_1	Klebsiella pneumoniae	D-026-I-b-1	Vietnam	ERS011842	Holt et al 2015	Human	carriage	2005	PRESENT	PRESENT	PRESENT	PRESENT	PRESENT	PRESENT	PRESENT	PRESENT	PRESENT
5193_3_9	Klebsiella pneumoniae	A-003-I-a-1	Vietnam	ERS011838	Holt et al 2015	Human	carriage	2005	PRESENT	PRESENT	PRESENT	PRESENT	PRESENT	PRESENT	PRESENT	PRESENT	PRESENT
5193_3_8	Klebsiella pneumoniae	K307An	Vietnam	ERS011837	Holt et al 2015	Human	carriage	2005	PRESENT	PRESENT	PRESENT	PRESENT	PRESENT	PRESENT	PRESENT	PRESENT	PRESENT
5193_3_7	Klebsiella pneumoniae	K296N	Vietnam	ERS011836	Holt et al 2015	Human	carriage	2005	PRESENT	PRESENT	PRESENT	PRESENT	PRESENT	PRESENT	PRESENT	PRESENT	PRESENT
5193_3_6	Klebsiella pneumoniae	K290N	Vietnam	ERS011835	Holt et al 2015	Human	carriage	2005	PRESENT	PRESENT	PRESENT	PRESENT	PRESENT	PRESENT	PRESENT	PRESENT	PRESENT
5193_3_5	Klebsiella pneumoniae	K282Ax	Vietnam	ERS011834	Holt et al 2015	Human	carriage	2005	PRESENT	PRESENT	PRESENT	PRESENT	PRESENT	PRESENT	PRESENT	PRESENT	PRESENT
5193_3_4	Klebsiella pneumoniae	K280N	Vietnam	ERS011833	Holt et al 2015	Human	carriage	2005	PRESENT	PRESENT	PRESENT	PRESENT	PRESENT	PRESENT	PRESENT	PRESENT	PRESENT
5193_3_12	Klebsiella pneumoniae	D-022-I-b-1	Vietnam	ERS011841	Holt et al 2015	Human	carriage	2005	PRESENT	PRESENT	PRESENT	PRESENT	PRESENT	PRESENT	PRESENT	PRESENT	PRESENT
5193_3_11	Klebsiella quasipneumoniae subsp. similipneumoniae	C-017-I-a-1	Vietnam	ERS011840	Holt et al 2015	Human		2005	PRESENT	PRESENT	PRESENT	PRESENT	PRESENT	PRESENT	PRESENT	PRESENT	PRESENT
5193_3_10	Klebsiella pneumoniae	B-013-I-a-2	Vietnam	ERS011839	Holt et al 2015	Human	carriage	2005	PRESENT	PRESENT	PRESENT	PRESENT	PRESENT	PRESENT	PRESENT	PRESENT	PRESENT
5193_3_1	Klebsiella quasipneumoniae subsp. similipneumoniae	K268An	Vietnam	ERS011830	Holt et al 2015	Human		2005	PRESENT	PRESENT	PRESENT	PRESENT	PRESENT	PRESENT	PRESENT	PRESENT	PRESENT
5193_2_9	Klebsiella pneumoniae	K35N	Vietnam	ERS011814	Holt et al 2015	Human	carriage	2004	PRESENT	PRESENT	PRESENT	PRESENT	PRESENT	PRESENT	PRESENT	PRESENT	PRESENT
5193_2_8	Klebsiella pneumoniae	K21Sp	Vietnam	ERS011813	Holt et al 2015	Human	carriage	2004	PRESENT	PRESENT	PRESENT	PRESENT	PRESENT	PRESENT	PRESENT	PRESENT	PRESENT
5193_2_7	Klebsiella pneumoniae	QMP B2-176	USA	ERS011812	Holt et al 2015	Bovine	infection	2006	PRESENT	PRESENT	PRESENT	PRESENT	PRESENT	PRESENT	PRESENT	PRESENT	PRESENT
5193_2_6	Klebsiella pneumoniae	UV1714	Vietnam	ERS011811	Holt et al 2015	Human	infection	2007	PRESENT	PRESENT	PRESENT	PRESENT	PRESENT	PRESENT	PRESENT	PRESENT	PRESENT
5193_2_5	Klebsiella pneumoniae	UV1625	Vietnam	ERS011810	Holt et al 2015	Human	infection	2007	PRESENT	PRESENT	PRESENT	PRESENT	PRESENT	PRESENT	PRESENT	PRESENT	PRESENT
5193_2_4	Klebsiella quasipneumoniae subsp. similipneumoniae	BAL073	Vietnam	ERS011809	Holt et al 2015	Human		2009	PRESENT	PRESENT	PRESENT	PRESENT	PRESENT	PRESENT	PRESENT	PRESENT	PRESENT
5193_2_3	Klebsiella quasipneumoniae subsp. similipneumoniae	NCSR130	Vietnam	ERS011808	Holt et al 2015	Human		2007	PRESENT	PRESENT	PRESENT	PRESENT	PRESENT	PRESENT	PRESENT	PRESENT	PRESENT
5193_2_2	Klebsiella pneumoniae	NCSR101	Vietnam	ERS011807	Holt et al 2015	Human	infection	2007	PRESENT	PRESENT	PRESENT	PRESENT	PRESENT	PRESENT	PRESENT	PRESENT	PRESENT
5193_2_12	Klebsiella pneumoniae	K77An	Vietnam	ERS011817	Holt et al 2015	Human	carriage	2004	PRESENT	PRESENT	PRESENT	PRESENT	PRESENT	PRESENT	PRESENT	PRESENT	PRESENT
5193_2_11	Klebsiella pneumoniae	K53N	Vietnam	ERS011816	Holt et al 2015	Human	carriage	2004	PRESENT	PRESENT	PRESENT	PRESENT	PRESENT	PRESENT	PRESENT	PRESENT	PRESENT
5193_2_10	Klebsiella quasipneumoniae subsp. similipneumoniae	K38An	Vietnam	ERS011815	Holt et al 2015	Human		2004	PRESENT	PRESENT	PRESENT	PRESENT	PRESENT	PRESENT	PRESENT	PRESENT	PRESENT
5193_2_1	Klebsiella pneumoniae	UV1172	Vietnam	ERS011806	Holt et al 2015	Human	infection	2004	PRESENT	PRESENT	PRESENT	PRESENT	PRESENT	PRESENT	PRESENT	PRESENT	PRESENT
5193_1_9	Klebsiella pneumoniae	08-058D	Vietnam	ERS011802	Holt et al 2015	Human	infection	2008	PRESENT	PRESENT	PRESENT	PRESENT	PRESENT	PRESENT	PRESENT	PRESENT	PRESENT
5193_1_8	Klebsiella pneumoniae	08-475T	Vietnam	ERS011801	Holt et al 2015	Human	invasive	2009	PRESENT	PRESENT	PRESENT	PRESENT	PRESENT	PRESENT	PRESENT	PRESENT	PRESENT
5193_1_7	Klebsiella pneumoniae	QMP B2-170	USA	ERS011800	Holt et al 2015	Bovine	infection	2006	PRESENT	PRESENT	PRESENT	PRESENT	PRESENT	PRESENT	PRESENT	PRESENT	PRESENT
5193_1_6	Klebsiella pneumoniae	07-2034m	Vietnam	ERS011799	Holt et al 2015	Human	invasive	2007	PRESENT	PRESENT	PRESENT	PRESENT	PRESENT	PRESENT	PRESENT	PRESENT	PRESENT
5193_1_5	Klebsiella pneumoniae	09-0079m	Vietnam	ERS011798	Holt et al 2015	Human	invasive	2009	PRESENT	PRESENT	PRESENT	PRESENT	PRESENT	PRESENT	PRESENT	PRESENT	PRESENT
5193_1_4	Klebsiella pneumoniae	07-0003m	Vietnam	ERS011797	Holt et al 2015	Human	invasive	2007	PRESENT	PRESENT	PRESENT	PRESENT	PRESENT	PRESENT	PRESENT	PRESENT	PRESENT
5193_1_12	Klebsiella pneumoniae	UV937	Vietnam	ERS011805	Holt et al 2015	Human	infection	2003	PRESENT	PRESENT	PRESENT	PRESENT	PRESENT	PRESENT	PRESENT	PRESENT	PRESENT
5193_1_11	Klebsiella pneumoniae	08-1177m	Vietnam	ERS011804	Holt et al 2015	Human	invasive	2008	PRESENT	PRESENT	PRESENT	PRESENT	PRESENT	PRESENT	PRESENT	PRESENT	PRESENT
5193_1_10	Klebsiella variicola	1892m	Vietnam	ERS011803	Holt et al 2015	Human		2008	PRESENT	PRESENT	PRESENT	PRESENT	PRESENT	PRESENT	PRESENT	PRESENT	PRESENT
5193_1_1	Klebsiella pneumoniae	59M	Vietnam	ERS011794	Holt et al 2015	Human	invasive	2008	PRESENT	PRESENT	PRESENT	PRESENT	PRESENT	PRESENT	PRESENT	PRESENT	PRESENT
5151_6_9	Klebsiella pneumoniae	QMP M1-406	USA	ERS011958	Holt et al 2015	Environmental		2005	PRESENT	PRESENT	PRESENT	PRESENT	PRESENT	PRESENT	PRESENT	PRESENT	PRESENT
5151_6_8	Klebsiella pneumoniae	QMP M1-378	USA	ERS011957	Holt et al 2015	Bovine	carriage	2005	PRESENT	PRESENT	PRESENT	PRESENT	PRESENT	PRESENT	PRESENT	PRESENT	PRESENT
5151_6_7	Klebsiella pneumoniae	QMP M1-376	USA	ERS011956	Holt et al 2015	Bovine	carriage	2005	PRESENT	PRESENT	PRESENT	PRESENT	PRESENT	PRESENT	PRESENT	PRESENT	PRESENT
5151_6_6	Klebsiella pneumoniae	QMP M1-375	USA	ERS011955	Holt et al 2015	Bovine	carriage	2005	PRESENT	PRESENT	PRESENT	PRESENT	PRESENT	PRESENT	PRESENT	PRESENT	PRESENT
5151_6_5	Klebsiella pneumoniae	QMP M1-222	USA	ERS011954	Holt et al 2015	Bovine	infection	2005	PRESENT	PRESENT	PRESENT	PRESENT	PRESENT	PRESENT	PRESENT	PRESENT	PRESENT
5151_6_4	Klebsiella pneumoniae	QMP M1-220	USA	ERS011953	Holt et al 2015	Bovine	infection	2005	PRESENT	PRESENT	PRESENT	PRESENT	PRESENT	PRESENT	PRESENT	PRESENT	PRESENT
5151_6_3	Klebsiella pneumoniae	QMP M1-218	USA	ERS011952	Holt et al 2015	Bovine	infection	2005	PRESENT	PRESENT	PRESENT	PRESENT	PRESENT	PRESENT	PRESENT	PRESENT	PRESENT
5151_6_2	Klebsiella pneumoniae	QMP M1-217	USA	ERS011951	Holt et al 2015	Bovine	infection	2005	PRESENT	PRESENT	PRESENT	PRESENT	PRESENT	PRESENT	PRESENT	PRESENT	PRESENT
5151_6_12	Klebsiella variicola	QMP M1-428	USA	ERS011961	Holt et al 2015	Bovine	infection	2005	PRESENT	PRESENT	PRESENT	PRESENT	PRESENT	PRESENT	PRESENT	PRESENT	PRESENT
5151_6_11	Klebsiella pneumoniae	QMP M1-415	USA	ERS011960	Holt et al 2015	Environmental		2005	PRESENT	PRESENT	PRESENT	PRESENT	PRESENT	PRESENT	PRESENT	PRESENT	PRESENT
5151_6_10	Klebsiella pneumoniae	QMP M1-413	USA	ERS011959	Holt et al 2015	Environmental		2005	PRESENT	PRESENT	PRESENT	PRESENT	PRESENT	PRESENT	PRESENT	PRESENT	PRESENT
5151_6_1	Klebsiella pneumoniae	QMP M1-200	USA	ERS011950	Holt et al 2015	Bovine	infection	2005	PRESENT	PRESENT	PRESENT	PRESENT	PRESENT	PRESENT	PRESENT	PRESENT	PRESENT
5151_5_9	Klebsiella variicola	QMP M1-763	USA	ERS011946	Holt et al 2015	Bovine	carriage	2006	PRESENT	PRESENT	PRESENT	PRESENT	PRESENT	PRESENT	PRESENT	PRESENT	PRESENT
5151_5_8	Klebsiella pneumoniae	QMP M1-761	USA	ERS011945	Holt et al 2015	Bovine	infection	2006	PRESENT	PRESENT	PRESENT	PRESENT	PRESENT	PRESENT	AMBIGUOUS	PRESENT	CONTIG
5151_5_7	Klebsiella pneumoniae	QMP M1-728	USA	ERS011944	Holt et al 2015	Bovine	infection	2006	PRESENT	PARTIAL	PRESENT	PRESENT	PRESENT	PRESENT	PARTIAL	CONTIG	PRESENT
5151_5_6	Klebsiella variicola	QMP M1-726	USA	ERS011943	Holt et al 2015	Bovine	infection	2006	PRESENT	PRESENT	PRESENT	PRESENT	PRESENT	PRESENT	CONTIG	PRESENT	CONTIG
5151_5_5	Klebsiella pneumoniae	QMP M1-562	USA	ERS011942	Holt et al 2015	Bovine	infection	2005	PRESENT	CONTIG	PRESENT	PRESENT	PRESENT	PARTIAL	PRESENT	CONTIG	ABSENT
5151_5_4	Klebsiella pneumoniae	QMP M1-561	USA	ERS011941	Holt et al 2015	Bovine	infection	2005	PRESENT	PRESENT	PRESENT	PRESENT	PRESENT	PRESENT	PRESENT	PRESENT	PRESENT
5151_5_3	Klebsiella pneumoniae	QMP M1-560	USA	ERS011940	Holt et al 2015	Bovine	infection	2005	PRESENT	PARTIAL	PRESENT	PRESENT	PRESENT	PRESENT	PRESENT	CONTIG	PRESENT
5151_5_2	Klebsiella pneumoniae	QMP M1-559	USA	ERS011939	Holt et al 2015	Bovine	infection	2005	PRESENT	PRESENT	PRESENT	PRESENT	PRESENT	PRESENT	PRESENT	PRESENT	PRESENT
5151_5_12	Klebsiella pneumoniae	QMP M1-771	USA	ERS011949	Holt et al 2015	Human	invasive	2006	PRESENT	PRESENT	PRESENT	PRESENT	PRESENT	PRESENT	PRESENT	PRESENT	PRESENT
5151_5_11	Klebsiella pneumoniae	QMP M1-766	USA	ERS011948	Holt et al 2015	Bovine	carriage	2006	PRESENT	PRESENT	PRESENT	PRESENT	PRESENT	PRESENT	PRESENT	PRESENT	PRESENT
5151_5_10	Klebsiella variicola	QMP M1-765	USA	ERS011947	Holt et al 2015	Bovine	carriage	2006	PRESENT	PARTIAL	PRESENT	PRESENT	PRESENT	PRESENT	PRESENT	CONTIG	PRESENT
5151_5_1	Klebsiella pneumoniae	QMP M1-557	USA	ERS011938	Holt et al 2015	Bovine	infection	2005	PRESENT	PRESENT	PRESENT	PRESENT	PRESENT	PRESENT	PRESENT	PRESENT	PRESENT
5151_3_9	Klebsiella pneumoniae	QMP M1-044	USA	ERS011934	Holt et al 2015	Bovine	carriage	2005	PRESENT	PRESENT	PRESENT	PRESENT	PRESENT	PRESENT	PRESENT	PRESENT	PRESENT
5151_3_8	Klebsiella variicola	QMP M1-043	USA	ERS011933	Holt et al 2015	Bovine	carriage	2005	PRESENT	PRESENT	PRESENT	PRESENT	PRESENT	PRESENT	PRESENT	PRESENT	PRESENT
5151_3_7	Klebsiella pneumoniae	QMP M1-042	USA	ERS011932	Holt et al 2015	Bovine	carriage	2005	PRESENT	PRESENT	PRESENT	PRESENT	PRESENT	CONTIG	PRESENT	PRESENT	ABSENT
5151_3_6	Klebsiella pneumoniae	QMP M1-031	USA	ERS011931	Holt et al 2015	Bovine	carriage	2005	PRESENT	PRESENT	PRESENT	PRESENT	PRESENT	PRESENT	PRESENT	PRESENT	PRESENT
5151_3_5	Klebsiella pneumoniae	QMP M1-030	USA	ERS011930	Holt et al 2015	Bovine	carriage	2005	PRESENT	PRESENT	PRESENT	PRESENT	PRESENT	PRESENT	PRESENT	PRESENT	PRESENT
5151_3_2	Klebsiella pneumoniae	QMP B2-563	USA	ERS011927	Holt et al 2015	Bovine	infection	2006	PRESENT	PRESENT	PRESENT	PRESENT	PRESENT	PRESENT	PRESENT	PRESENT	PRESENT
5151_3_11	Klebsiella pneumoniae	QMP M1-198	USA	ERS011936	Holt et al 2015	Bovine	infection	2005	PRESENT	PRESENT	PRESENT	PRESENT	PRESENT	PRESENT	PRESENT	PRESENT	PRESENT
5151_3_10	Klebsiella pneumoniae	QMP M1-051	USA	ERS011935	Holt et al 2015	Bovine	carriage	2005	PRESENT	PRESENT	PRESENT	PRESENT	PRESENT	PRESENT	PRESENT	PRESENT	PRESENT
5151_3_1	Klebsiella variicola	QMP B2-483	USA	ERS011926	Holt et al 2015	Bovine	carriage	2006	PRESENT	PRESENT	PRESENT	PRESENT	PRESENT	PRESENT	PRESENT	PRESENT	PRESENT
5151_2_9	Klebsiella quasipneumoniae subsp. similipneumoniae	DR85/08	Singapore	ERS011922	Holt et al 2015	Environmental		2008	PRESENT	PRESENT	PRESENT	PRESENT	PRESENT	PRESENT	PRESENT	PRESENT	PRESENT
5151_2_8	Klebsiella pneumoniae	DX259/08	Singapore	ERS011921	Holt et al 2015	Human	invasive	2008	PRESENT	PRESENT	PRESENT	PRESENT	PRESENT	PRESENT	PRESENT	PRESENT	PRESENT
5151_2_7	Klebsiella variicola	QMP B2-340	USA	ERS011920	Holt et al 2015	Bovine	carriage	2006	PRESENT	PRESENT	PRESENT	PRESENT	PRESENT	PRESENT	PRESENT	PRESENT	PRESENT
5151_2_6	Klebsiella pneumoniae	DU8882/04	Singapore	ERS011919	Holt et al 2015	Human	infection	2004	PRESENT	PRESENT	PRESENT	PRESENT	PRESENT	PRESENT	PRESENT	PRESENT	PRESENT
5151_2_5	Klebsiella pneumoniae	DB270/04	Singapore	ERS011918	Holt et al 2015	Human	invasive	2004	PRESENT	PRESENT	PRESENT	PRESENT	PRESENT	PRESENT	PRESENT	PRESENT	PRESENT
5151_2_4	Klebsiella pneumoniae	DM11825/05	Singapore	ERS011917	Holt et al 2015	Human	invasive	2005	PRESENT	PRESENT	PRESENT	PRESENT	PRESENT	PRESENT	PRESENT	PRESENT	PRESENT
5151_2_3	Klebsiella pneumoniae	DM17337/04	Singapore	ERS011916	Holt et al 2015	Human	infection	2004	PRESENT	PRESENT	PRESENT	PRESENT	PRESENT	PRESENT	PRESENT	PRESENT	PRESENT
5151_2_2	Klebsiella pneumoniae	DM17138/03	Singapore	ERS011915	Holt et al 2015	Human	invasive	2003	PRESENT	PRESENT	PRESENT	PRESENT	PRESENT	PRESENT	PRESENT	PRESENT	PRESENT
5151_2_12	Klebsiella variicola	QMP B2-481	USA	ERS011925	Holt et al 2015	Bovine	carriage	2006	PRESENT	PRESENT	PRESENT	PRESENT	PRESENT	PRESENT	PRESENT	PRESENT	PRESENT
5151_2_11	Klebsiella pneumoniae	QMP B2-344	USA	ERS011924	Holt et al 2015	Bovine	carriage	2006	PRESENT	PRESENT	PRESENT	PRESENT	PRESENT	PRESENT	PRESENT	PRESENT	PRESENT
5151_2_10	Klebsiella pneumoniae	DU46543/08	Singapore	ERS011923	Holt et al 2015	Human	infection	2008	PRESENT	PRESENT	PRESENT	PRESENT	PRESENT	PRESENT	PRESENT	PRESENT	PRESENT
5151_2_1	Klebsiella pneumoniae	DM16912/02	Singapore	ERS011914	Holt et al 2015	Human	invasive	2002	PRESENT	PRESENT	PRESENT	PRESENT	PRESENT	PRESENT	PRESENT	PRESENT	PRESENT
5150_5_9	Klebsiella pneumoniae	AJ278	Australia	ERS005785	Holt et al 2015	Human	infection	2002	PRESENT	PRESENT	PRESENT	PRESENT	PRESENT	PRESENT	PRESENT	PRESENT	PRESENT
5150_5_8	Klebsiella pneumoniae	AJ256	Australia	ERS005784	Holt et al 2015	Human	infection	2002	PRESENT	CONTIG	PRESENT	PRESENT	PRESENT	PRESENT	PRESENT	CONTIG	PRESENT
5150_5_7	Klebsiella pneumoniae	AJ229	Australia	ERS005783	Holt et al 2015	Human	infection	2002	PRESENT	PRESENT	PRESENT	PRESENT	PRESENT	PRESENT	PRESENT	PRESENT	PRESENT
5150_5_5	Klebsiella pneumoniae	AJ218	Australia	ERS005781	Holt et al 2015	Human	infection	2002	PRESENT	PRESENT	PRESENT	PRESENT	PRESENT	PRESENT	PRESENT	PRESENT	PRESENT
5150_5_4	Klebsiella pneumoniae	AJ303	Australia	ERS005780	Holt et al 2015	Human	infection	2002	PRESENT	PRESENT	PRESENT	PRESENT	PRESENT	PRESENT	PRESENT	PRESENT	PRESENT
5150_5_3	Klebsiella pneumoniae	AJ299	Australia	ERS005779	Holt et al 2015	Human	invasive	2002	PRESENT	PRESENT	PRESENT	PRESENT	PRESENT	PRESENT	PRESENT	PRESENT	PRESENT
5150_5_2	Klebsiella variicola	AJ292	Australia	ERS005778	Holt et al 2015	Human		2002	PRESENT	PRESENT	PRESENT	PRESENT	PRESENT	PRESENT	PRESENT	PRESENT	PRESENT
5150_5_12	Klebsiella pneumoniae	AJ290	Australia	ERS005788	Holt et al 2015	Human	invasive	2002	PRESENT	PRESENT	PRESENT	PRESENT	PRESENT	PRESENT	PRESENT	PRESENT	PRESENT
5150_5_11	Klebsiella pneumoniae	AJ289	Australia	ERS005787	Holt et al 2015	Human	invasive	2002	PRESENT	PRESENT	PRESENT	PRESENT	PRESENT	PRESENT	PRESENT	PRESENT	PRESENT
5150_5_10	Klebsiella pneumoniae	AJ281	Australia	ERS005786	Holt et al 2015	Human	invasive	2002	PRESENT	PRESENT	PRESENT	PRESENT	PRESENT	PRESENT	PRESENT	PRESENT	PRESENT
5150_5_1	Klebsiella pneumoniae	AJ214	Australia	ERS005777	Holt et al 2015	Human	invasive	2002	PRESENT	PRESENT	PRESENT	PRESENT	PRESENT	PRESENT	PRESENT	PRESENT	PRESENT
5150_3_9	Klebsiella pneumoniae	AJ188	Australia	ERS005773	Holt et al 2015	Human	infection	2002	PRESENT	PRESENT	PRESENT	PRESENT	PRESENT	PRESENT	PRESENT	PRESENT	PRESENT
5150_3_8	Klebsiella variicola	AJ182	Australia	ERS005771	Holt et al 2015	Human		2002	PRESENT	CONTIG	PRESENT	PRESENT	PRESENT	PRESENT	PRESENT	CONTIG	PRESENT
5150_3_7	Klebsiella pneumoniae	AJ170	Australia	ERS005772	Holt et al 2015	Human	invasive	2002	PRESENT	PRESENT	PRESENT	PRESENT	PRESENT	PRESENT	PRESENT	PRESENT	PRESENT
5150_3_6	Klebsiella pneumoniae	AJ158	Australia	ERS005770	Holt et al 2015	Human	infection	2002	PRESENT	PRESENT	PRESENT	PRESENT	PRESENT	PRESENT	PRESENT	PRESENT	PRESENT
5150_3_5	Klebsiella pneumoniae	AJ156	Australia	ERS005768	Holt et al 2015	Human	infection	2002	PRESENT	PRESENT	PRESENT	PRESENT	PRESENT	PRESENT	PRESENT	PRESENT	PRESENT
5150_3_3	Klebsiella pneumoniae	AJ211	Australia	ERS005767	Holt et al 2015	Human	infection	2002	PRESENT	PRESENT	PRESENT	PRESENT	PRESENT	PRESENT	PRESENT	PRESENT	PRESENT
5150_3_2	Klebsiella pneumoniae	AJ210	Australia	ERS005766	Holt et al 2015	Human	invasive	2002	PRESENT	PRESENT	PRESENT	PRESENT	PRESENT	PRESENT	PRESENT	PRESENT	PRESENT
5150_3_11	Klebsiella pneumoniae	AJ205	Australia	ERS005775	Holt et al 2015	Human	infection	2002	PRESENT	PRESENT	PRESENT	PRESENT	PRESENT	PRESENT	PRESENT	PRESENT	PRESENT
5150_3_10	Klebsiella pneumoniae	AJ196	Australia	ERS005774	Holt et al 2015	Human	infection	2002	PRESENT	PRESENT	PRESENT	PRESENT	PRESENT	PRESENT	PRESENT	PRESENT	PRESENT
5150_3_1	Klebsiella pneumoniae	AJ155	Australia	ERS005765	Holt et al 2015	Human	infection	2002	PRESENT	PRESENT	PRESENT	PRESENT	PRESENT	PRESENT	PRESENT	PRESENT	PRESENT
5150_2_8	Klebsiella pneumoniae	AJ083	Australia	ERS005760	Holt et al 2015	Human	infection	2002	PRESENT	PRESENT	PRESENT	PRESENT	PRESENT	PRESENT	PRESENT	PRESENT	PRESENT
5150_2_7	Klebsiella pneumoniae	AJ082	Australia	ERS005759	Holt et al 2015	Human	infection	2002	PRESENT	PRESENT	PRESENT	PRESENT	PRESENT	PRESENT	PRESENT	PRESENT	PRESENT
5150_2_6	Klebsiella pneumoniae	AJ064	Australia	ERS005758	Holt et al 2015	Human	infection	2001	PRESENT	CONTIG	PRESENT	PRESENT	PRESENT	PRESENT	PRESENT	CONTIG	PRESENT
5150_2_5	Klebsiella pneumoniae	AJ056	Australia	ERS005757	Holt et al 2015	Human	infection	2001	PRESENT	PRESENT	PRESENT	PRESENT	PRESENT	PRESENT	PRESENT	PRESENT	PRESENT
5150_2_4	Klebsiella pneumoniae	AJ148	Australia	ERS005755	Holt et al 2015	Human	infection	2002	PRESENT	PRESENT	PRESENT	PRESENT	PRESENT	PRESENT	PRESENT	PRESENT	PRESENT
5150_2_3	Klebsiella pneumoniae	AJ146	Australia	ERS005756	Holt et al 2015	Human	infection	2002	PRESENT	PRESENT	PRESENT	PRESENT	PRESENT	PRESENT	PRESENT	PRESENT	PRESENT
5150_2_2	Klebsiella variicola	AJ135	Australia	ERS005754	Holt et al 2015	Human		2002	PRESENT	PRESENT	PRESENT	PRESENT	PRESENT	PRESENT	PRESENT	PRESENT	PRESENT
5150_2_12	Klebsiella pneumoniae	AJ099	Australia	ERS005764	Holt et al 2015	Human	infection	2002	PRESENT	PRESENT	PRESENT	PRESENT	PRESENT	PRESENT	PRESENT	PRESENT	PRESENT
5150_2_11	Klebsiella pneumoniae	AJ097	Australia	ERS005763	Holt et al 2015	Human	infection	2002	PRESENT	PRESENT	PRESENT	PRESENT	PRESENT	PRESENT	PRESENT	PRESENT	PRESENT
5150_2_10	Klebsiella pneumoniae	AJ094	Australia	ERS005762	Holt et al 2015	Human	infection	2002	PRESENT	PRESENT	PRESENT	PRESENT	PRESENT	PRESENT	PRESENT	PRESENT	PRESENT
5150_2_1	Klebsiella quasipneumoniae subsp. similipneumoniae	AJ055	Australia	ERS005752	Holt et al 2015	Human		2001	PRESENT	PRESENT	PRESENT	PRESENT	PRESENT	PRESENT	PRESENT	PRESENT	PRESENT
5150_1_9	Klebsiella pneumoniae	AJ031	Australia	ERS005749	Holt et al 2015	Human	infection	2001	PRESENT	PRESENT	PRESENT	PRESENT	PRESENT	PRESENT	PRESENT	PRESENT	PRESENT
5150_1_8	Klebsiella variicola	AJ027	Australia	ERS005748	Holt et al 2015	Human		2001	PRESENT	PRESENT	PRESENT	PRESENT	PRESENT	PRESENT	PRESENT	PRESENT	PRESENT
5150_1_7	Klebsiella variicola	AJ026	Australia	ERS005747	Holt et al 2015	Human		2001	PRESENT	PRESENT	PRESENT	PRESENT	PRESENT	PRESENT	PRESENT	PRESENT	PRESENT
5150_1_5	Klebsiella pneumoniae	AJ006	Australia	ERS005745	Holt et al 2015	Human	invasive	2001	PRESENT	PRESENT	PRESENT	PRESENT	PRESENT	PRESENT	PRESENT	PRESENT	PRESENT
5150_1_4	Klebsiella pneumoniae	AJ054	Australia	ERS005744	Holt et al 2015	Human	infection	2001	PRESENT	PRESENT	PRESENT	PRESENT	PRESENT	PRESENT	PRESENT	PRESENT	PRESENT
5150_1_3	Klebsiella pneumoniae	AJ049	Australia	ERS005743	Holt et al 2015	Human	infection	2001	PRESENT	PRESENT	PRESENT	PRESENT	PRESENT	PRESENT	PRESENT	PRESENT	PRESENT
5150_1_2	Klebsiella pneumoniae	AJ048	Australia	ERS005742	Holt et al 2015	Human	infection	2001	PRESENT	PRESENT	PRESENT	PRESENT	PRESENT	PRESENT	PRESENT	PRESENT	PRESENT
5150_1_11	Klebsiella pneumoniae	AJ034	Australia	ERS005751	Holt et al 2015	Human	infection	2001	PRESENT	PRESENT	PRESENT	PRESENT	PRESENT	PRESENT	PRESENT	PRESENT	PRESENT
5150_1_10	Klebsiella pneumoniae	AJ033	Australia	ERS005750	Holt et al 2015	Human	infection	2001	PRESENT	PRESENT	PRESENT	PRESENT	PRESENT	PRESENT	PRESENT	PRESENT	PRESENT
507522_6	Klebsiella variicola	342		CP000964,CP000966,CP000965	PATRIC	maize			PRESENT	PRESENT	PRESENT	PRESENT	PRESENT	PRESENT	PRESENT	PRESENT	PRESENT
484021_57	Klebsiella pneumoniae	NTUH-K2044		AP006725,AP006726	PATRIC		infection		PRESENT	PRESENT	PRESENT	PRESENT	PRESENT	PRESENT	PRESENT	PRESENT	PRESENT
272620_9	Klebsiella pneumoniae	MGH 78578		CP000647,CP000649,CP000650,CP000651,CP000652,CP000648	PATRIC	human			PRESENT	PRESENT	PRESENT	PRESENT	PRESENT	PRESENT	PRESENT	PRESENT	PRESENT
16870_8_9	Klebsiella pneumoniae	INF165	Australia	ERR1035980	wyres et al. 2016	human	infection	2013	PRESENT	PRESENT	PRESENT	PRESENT	PRESENT	PRESENT	PRESENT	PRESENT	PRESENT
16870_8_86	Klebsiella pneumoniae	INF246	Australia	ERR1035991	wyres et al. 2016	human	infection	2013	PRESENT	PRESENT	PRESENT	PRESENT	PRESENT	PRESENT	PRESENT	PRESENT	PRESENT
16870_8_85	Klebsiella variicola	INF245	Australia	ERR1035990	wyres et al. 2016	human	infection	2013	PRESENT	PRESENT	PRESENT	PRESENT	PRESENT	PRESENT	PRESENT	PRESENT	PRESENT
16870_8_84	Klebsiella pneumoniae	INF243	Australia	ERR1035989	wyres et al. 2016	human	infection	2013	PRESENT	PRESENT	PRESENT	PRESENT	PRESENT	PRESENT	PRESENT	PRESENT	PRESENT
16870_8_83	Klebsiella pneumoniae	INF242	Australia	ERR1035988	wyres et al. 2016	human	infection	2013	PRESENT	PRESENT	PRESENT	PRESENT	PRESENT	PRESENT	PRESENT	PRESENT	PRESENT
16870_8_82	Klebsiella pneumoniae	INF241	Australia	ERR1035987	wyres et al. 2016	human	infection	2013	PRESENT	PRESENT	PRESENT	PRESENT	PRESENT	PRESENT	PRESENT	PRESENT	PRESENT
16870_8_80	Klebsiella pneumoniae	INF239	Australia	ERR1035985	wyres et al. 2016	human	infection	2013	PRESENT	PRESENT	PRESENT	PRESENT	PRESENT	PRESENT	PRESENT	PRESENT	PRESENT
16870_8_8	Klebsiella pneumoniae	INF162	Australia	ERR1035979	wyres et al. 2016	human	infection	2013	PRESENT	PRESENT	PRESENT	PRESENT	PRESENT	PRESENT	PRESENT	PRESENT	PRESENT
16870_8_79	Klebsiella variicola	INF238	Australia	ERR1035984	wyres et al. 2016	human	infection	2013	PRESENT	PRESENT	PRESENT	PRESENT	PRESENT	PRESENT	PRESENT	PRESENT	PRESENT
16870_8_78	Klebsiella pneumoniae	INF237	Australia	ERR1035983	wyres et al. 2016	human	infection	2013	PRESENT	PRESENT	PRESENT	PRESENT	PRESENT	PRESENT	PRESENT	PRESENT	PRESENT
16870_8_76	Klebsiella pneumoniae	INF235	Australia	ERR1035981	wyres et al. 2016	human	infection	2013	PRESENT	PRESENT	PRESENT	PRESENT	PRESENT	PRESENT	PRESENT	PRESENT	PRESENT
16870_8_75	Klebsiella pneumoniae	INF234	Australia	ERR1023869	wyres et al. 2016	human	infection	2013	PRESENT	PRESENT	PRESENT	PRESENT	PRESENT	PRESENT	PRESENT	PRESENT	PRESENT
16870_8_74	Klebsiella pneumoniae	INF233	Australia	ERR1023868	wyres et al. 2016	human	infection	2013	PRESENT	PRESENT	PRESENT	PRESENT	PRESENT	PRESENT	PRESENT	PRESENT	PRESENT
16870_8_73	Klebsiella variicola	INF232	Australia	ERR1023867	wyres et al. 2016	human	infection	2013	PRESENT	PRESENT	PRESENT	PRESENT	PRESENT	PRESENT	PRESENT	PRESENT	PRESENT
16870_8_72	Klebsiella pneumoniae	INF231	Australia	ERR1023866	wyres et al. 2016	human	infection	2013	PRESENT	PRESENT	PRESENT	PRESENT	PRESENT	PRESENT	PRESENT	PRESENT	PRESENT
16870_8_71	Klebsiella quasipneumoniae subsp. similipneumoniae	INF230	Australia	ERR1023865	wyres et al. 2016	human	infection	2013	PRESENT	PRESENT	PRESENT	PRESENT	PRESENT	PRESENT	PRESENT	PRESENT	PRESENT
16870_8_7	Klebsiella pneumoniae	INF161	Australia	ERR1023804	wyres et al. 2016	human	infection	2013	PRESENT	PRESENT	PRESENT	PRESENT	PRESENT	PRESENT	PRESENT	PRESENT	PRESENT
16870_8_69	Klebsiella pneumoniae	INF227	Australia	ERR1023864	wyres et al. 2016	human	infection	2013	PRESENT	PRESENT	PRESENT	PRESENT	PRESENT	PRESENT	PRESENT	PRESENT	PRESENT
16870_8_68	Klebsiella pneumoniae	INF226	Australia	ERR1023863	wyres et al. 2016	human	infection	2013	PRESENT	PRESENT	PRESENT	PRESENT	PRESENT	PRESENT	PRESENT	PRESENT	PRESENT
16870_8_67	Klebsiella pneumoniae	INF225	Australia	ERR1023862	wyres et al. 2016	human	infection	2013	PRESENT	PRESENT	PRESENT	PRESENT	PRESENT	PRESENT	PRESENT	PRESENT	PRESENT
16870_8_66	Klebsiella pneumoniae	INF224	Australia	ERR1023861	wyres et al. 2016	human	infection	2013	PRESENT	PRESENT	PRESENT	PRESENT	PRESENT	PRESENT	PRESENT	PRESENT	PRESENT
16870_8_65	Klebsiella pneumoniae	INF223	Australia	ERR1023860	wyres et al. 2016	human	infection	2013	PRESENT	PRESENT	PRESENT	PRESENT	PRESENT	PRESENT	PRESENT	PRESENT	PRESENT
16870_8_64	Klebsiella quasipneumoniae subsp. similipneumoniae	INF222	Australia	ERR1023859	wyres et al. 2016	human	infection	2013	PRESENT	PRESENT	PRESENT	PRESENT	PRESENT	PRESENT	PRESENT	PRESENT	PRESENT
16870_8_63	Klebsiella quasipneumoniae subsp. similipneumoniae	INF221	Australia	ERR1023858	wyres et al. 2016	human	infection	2013	PRESENT	PRESENT	PRESENT	PRESENT	PRESENT	PRESENT	PRESENT	PRESENT	PRESENT
16870_8_62	Klebsiella pneumoniae	INF220	Australia	ERR1023857	wyres et al. 2016	human	infection	2013	PRESENT	PRESENT	PRESENT	PRESENT	PRESENT	PRESENT	PRESENT	PRESENT	PRESENT
16870_8_61	Klebsiella variicola	INF219	Australia	ERR1023856	wyres et al. 2016	human	infection	2013	PRESENT	PRESENT	PRESENT	PRESENT	PRESENT	PRESENT	PRESENT	PRESENT	PRESENT
16870_8_60	Klebsiella variicola	INF218	Australia	ERR1023855	wyres et al. 2016	human	infection	2013	PRESENT	PRESENT	PRESENT	PRESENT	PRESENT	PRESENT	PRESENT	PRESENT	PRESENT
16870_8_6	Klebsiella pneumoniae	INF160	Australia	ERR1023803	wyres et al. 2016	human	infection	2013	PRESENT	PRESENT	PRESENT	PRESENT	PRESENT	PRESENT	PRESENT	PRESENT	PRESENT
16870_8_59	Klebsiella variicola	INF217	Australia	ERR1023854	wyres et al. 2016	human	infection	2013	PRESENT	PRESENT	PRESENT	PRESENT	PRESENT	PRESENT	PRESENT	PRESENT	PRESENT
16870_8_58	Klebsiella variicola	INF216	Australia	ERR1023853	wyres et al. 2016	human	infection	2013	PRESENT	PRESENT	PRESENT	PRESENT	PRESENT	PRESENT	PRESENT	PRESENT	PRESENT
16870_8_57	Klebsiella pneumoniae	INF215	Australia	ERR1023852	wyres et al. 2016	human	infection	2013	PRESENT	PRESENT	PRESENT	PRESENT	PRESENT	PRESENT	PRESENT	PRESENT	PRESENT
16870_8_56	Klebsiella pneumoniae	INF214	Australia	ERR1023851	wyres et al. 2016	human	infection	2013	PRESENT	PRESENT	PRESENT	PRESENT	PRESENT	PRESENT	PRESENT	PRESENT	PRESENT
16870_8_55	Klebsiella pneumoniae	INF213	Australia	ERR1023850	wyres et al. 2016	human	infection	2013	PRESENT	PRESENT	PRESENT	PRESENT	PRESENT	PRESENT	PRESENT	PRESENT	PRESENT
16870_8_54	Klebsiella variicola	INF212	Australia	ERR1023849	wyres et al. 2016	human	infection	2013	PRESENT	PRESENT	PRESENT	PRESENT	PRESENT	PRESENT	PRESENT	PRESENT	PRESENT
16870_8_53	Klebsiella pneumoniae	INF211	Australia	ERR1023848	wyres et al. 2016	human	infection	2013	PRESENT	PRESENT	PRESENT	PRESENT	PRESENT	PRESENT	PRESENT	PRESENT	PRESENT
16870_8_51	Klebsiella variicola	INF209	Australia	ERR1023846	wyres et al. 2016	human	infection	2013	PRESENT	PRESENT	PRESENT	PRESENT	PRESENT	PRESENT	PRESENT	PRESENT	PRESENT
16870_8_50	Klebsiella variicola	INF208	Australia	ERR1023845	wyres et al. 2016	human	infection	2013	PRESENT	PRESENT	PRESENT	PRESENT	PRESENT	PRESENT	PRESENT	PRESENT	PRESENT
16870_8_5	Klebsiella pneumoniae	INF159	Australia	ERR1023802	wyres et al. 2016	human	infection	2013	PRESENT	PRESENT	PRESENT	PRESENT	PRESENT	PRESENT	PRESENT	PRESENT	PRESENT
16870_8_49	Klebsiella quasipneumoniae subsp. similipneumoniae	INF207	Australia	ERR1023844	wyres et al. 2016	human	infection	2013	PRESENT	PRESENT	PRESENT	PRESENT	PRESENT	PRESENT	PRESENT	PRESENT	PRESENT
16870_8_48	Klebsiella pneumoniae	INF206	Australia	ERR1023843	wyres et al. 2016	human	infection	2013	PRESENT	PRESENT	PRESENT	PRESENT	PRESENT	PRESENT	PRESENT	PRESENT	PRESENT
16870_8_47	Klebsiella pneumoniae	INF205	Australia	ERR1023842	wyres et al. 2016	human	infection	2013	PRESENT	PRESENT	PRESENT	PRESENT	PRESENT	PRESENT	PRESENT	PRESENT	PRESENT
16870_8_46	Klebsiella pneumoniae	INF204	Australia	ERR1023841	wyres et al. 2016	human	infection	2013	PRESENT	PRESENT	PRESENT	PRESENT	PRESENT	PRESENT	PRESENT	PRESENT	PRESENT
16870_8_45	Klebsiella variicola	INF203	Australia	ERR1023840	wyres et al. 2016	human	infection	2013	PRESENT	PRESENT	PRESENT	PRESENT	PRESENT	PRESENT	PRESENT	PRESENT	PRESENT
16870_8_44	Klebsiella pneumoniae	INF202	Australia	ERR1023839	wyres et al. 2016	human	infection	2013	PRESENT	PRESENT	PRESENT	PRESENT	PRESENT	PRESENT	PRESENT	PRESENT	PRESENT
16870_8_43	Klebsiella pneumoniae	INF201	Australia	ERR1023838	wyres et al. 2016	human	infection	2013	PRESENT	PRESENT	PRESENT	PRESENT	PRESENT	PRESENT	PRESENT	PRESENT	PRESENT
16870_8_42	Klebsiella pneumoniae	INF200	Australia	ERR1023837	wyres et al. 2016	human	infection	2013	PRESENT	PRESENT	PRESENT	PRESENT	PRESENT	PRESENT	PRESENT	PRESENT	PRESENT
16870_8_41	Klebsiella pneumoniae	INF199	Australia	ERR1023836	wyres et al. 2016	human	infection	2013	PRESENT	PRESENT	PRESENT	PRESENT	PRESENT	PRESENT	PRESENT	PRESENT	PRESENT
16870_8_40	Klebsiella pneumoniae	INF198	Australia	ERR1023835	wyres et al. 2016	human	infection	2013	PRESENT	PRESENT	PRESENT	PRESENT	PRESENT	PRESENT	PRESENT	PRESENT	PRESENT
16870_8_4	Klebsiella pneumoniae	INF158	Australia	ERR1023801	wyres et al. 2016	human		2013	PRESENT	PRESENT	PRESENT	PRESENT	PRESENT	PRESENT	PRESENT	PRESENT	PRESENT
16870_8_39	Klebsiella pneumoniae	INF197	Australia	ERR1023834	wyres et al. 2016	human	infection	2013	PRESENT	PRESENT	PRESENT	PRESENT	PRESENT	PRESENT	PRESENT	PRESENT	PRESENT
16870_8_38	Klebsiella quasipneumoniae subsp. similipneumoniae	INF186	Australia	ERR1023833	wyres et al. 2016	human	infection	2013	PRESENT	PRESENT	PRESENT	PRESENT	PRESENT	PRESENT	PRESENT	PRESENT	PRESENT
16870_8_37	Klebsiella quasipneumoniae subsp. similipneumoniae	INF195	Australia	ERR1023832	wyres et al. 2016	human	infection	2013	PRESENT	PRESENT	PRESENT	PRESENT	PRESENT	PRESENT	PRESENT	PRESENT	PRESENT
16870_8_36	Klebsiella pneumoniae	INF194	Australia	ERR1023831	wyres et al. 2016	human	infection	2013	PRESENT	PRESENT	PRESENT	PRESENT	PRESENT	PRESENT	PRESENT	PRESENT	PRESENT
16870_8_35	Klebsiella variicola	INF193	Australia	ERR1023830	wyres et al. 2016	human	infection	2013	PRESENT	PRESENT	PRESENT	PRESENT	PRESENT	PRESENT	PRESENT	PRESENT	PRESENT
16870_8_34	Klebsiella pneumoniae	INF192	Australia	ERR1023829	wyres et al. 2016	human	infection	2013	PRESENT	PRESENT	PRESENT	PRESENT	PRESENT	PRESENT	PRESENT	PRESENT	PRESENT
16870_8_33	Klebsiella pneumoniae	INF191	Australia	ERR1023828	wyres et al. 2016	human	infection	2013	PRESENT	PRESENT	PRESENT	PRESENT	PRESENT	PRESENT	PRESENT	PRESENT	PRESENT
16870_8_31	Klebsiella variicola	INF189	Australia	ERR1023826	wyres et al. 2016	human	infection	2013	PRESENT	PRESENT	PRESENT	PRESENT	PRESENT	PRESENT	PRESENT	PRESENT	PRESENT
16870_8_30	Klebsiella pneumoniae	INF188	Australia	ERR1023825	wyres et al. 2016	human	infection	2013	PRESENT	PRESENT	PRESENT	PRESENT	PRESENT	PRESENT	PRESENT	PRESENT	PRESENT
16870_8_3	Klebsiella pneumoniae	INF157	Australia	ERR1023800	wyres et al. 2016	human	infection	2013	PRESENT	PRESENT	PRESENT	PRESENT	PRESENT	PRESENT	PRESENT	PRESENT	PRESENT
16870_8_29	Klebsiella quasipneumoniae subsp. similipneumoniae	INF187	Australia	ERR1023824	wyres et al. 2016	human	infection	2013	PRESENT	PRESENT	PRESENT	PRESENT	PRESENT	PRESENT	PRESENT	PRESENT	PRESENT
16870_8_27	Klebsiella pneumoniae	INF184	Australia	ERR1023822	wyres et al. 2016	human	infection	2013	PRESENT	PRESENT	PRESENT	PRESENT	PRESENT	PRESENT	PRESENT	PRESENT	PRESENT
16870_8_26	Klebsiella pneumoniae	INF183	Australia	ERR1023821	wyres et al. 2016	human	infection	2013	PRESENT	PRESENT	PRESENT	PRESENT	PRESENT	PRESENT	PRESENT	PRESENT	PRESENT
16870_8_25	Klebsiella pneumoniae	INF182	Australia	ERR1023820	wyres et al. 2016	human	infection	2013	PRESENT	PRESENT	PRESENT	PRESENT	PRESENT	PRESENT	PRESENT	PRESENT	PRESENT
16870_8_24	Klebsiella variicola	INF181	Australia	ERR1023819	wyres et al. 2016	human	infection	2013	PRESENT	PRESENT	PRESENT	PRESENT	PRESENT	PRESENT	PRESENT	PRESENT	PRESENT
16870_8_23	Klebsiella pneumoniae	INF180	Australia	ERR1023818	wyres et al. 2016	human	infection	2013	PRESENT	PRESENT	PRESENT	PRESENT	PRESENT	PRESENT	PRESENT	PRESENT	PRESENT
16870_8_22	Klebsiella pneumoniae	INF179	Australia	ERR1023817	wyres et al. 2016	human	infection	2013	PRESENT	PRESENT	PRESENT	PRESENT	PRESENT	PRESENT	PRESENT	PRESENT	PRESENT
16870_8_21	Klebsiella pneumoniae	INF178	Australia	ERR1023816	wyres et al. 2016	human	infection	2013	PRESENT	PRESENT	PRESENT	PRESENT	PRESENT	PRESENT	PRESENT	PRESENT	PRESENT
16870_8_20	Klebsiella pneumoniae	INF177	Australia	ERR1023815	wyres et al. 2016	human	infection	2013	PRESENT	PRESENT	PRESENT	PRESENT	PRESENT	PRESENT	STOPS	PRESENT	PRESENT
16870_8_2	Klebsiella pneumoniae	INF156	Australia	ERR1023799	wyres et al. 2016	human	infection	2013	PRESENT	PRESENT	PRESENT	PRESENT	PRESENT	PRESENT	PRESENT	PRESENT	PRESENT
16870_8_19	Klebsiella pneumoniae	INF176	Australia	ERR1023814	wyres et al. 2016	human	infection	2013	PRESENT	PRESENT	PRESENT	PRESENT	PRESENT	PRESENT	PRESENT	PRESENT	PRESENT
16870_8_18	Klebsiella pneumoniae	INF175	Australia	ERR1023813	wyres et al. 2016	human	infection	2013	PRESENT	PRESENT	PRESENT	PRESENT	PRESENT	PRESENT	PRESENT	PRESENT	PRESENT
16870_8_17	Klebsiella pneumoniae	INF174	Australia	ERR1023812	wyres et al. 2016	human	infection	2013	PRESENT	PRESENT	PRESENT	PRESENT	PRESENT	PRESENT	PRESENT	PRESENT	PRESENT
16870_8_16	Klebsiella pneumoniae	INF173	Australia	ERR1023811	wyres et al. 2016	human	infection	2013	PRESENT	PRESENT	PRESENT	PRESENT	PRESENT	PRESENT	PRESENT	PRESENT	PRESENT
16870_8_15	Klebsiella pneumoniae	INF172	Australia	ERR1023810	wyres et al. 2016	human	infection	2013	PRESENT	PRESENT	PRESENT	PRESENT	PRESENT	PRESENT	PRESENT	PRESENT	PRESENT
16870_8_14	Klebsiella pneumoniae	INF171	Australia	ERR1023809	wyres et al. 2016	human	infection	2013	PRESENT	PRESENT	PRESENT	PRESENT	PRESENT	PRESENT	PRESENT	PRESENT	PRESENT
16870_8_13	Klebsiella pneumoniae	INF170	Australia	ERR1023808	wyres et al. 2016	human	infection	2013	PRESENT	PRESENT	PRESENT	PRESENT	PRESENT	PRESENT	PRESENT	PRESENT	PRESENT
16870_8_12	Klebsiella pneumoniae	INF168	Australia	ERR1023807	wyres et al. 2016	human	infection	2013	PRESENT	PRESENT	PRESENT	PRESENT	PRESENT	PRESENT	PRESENT	PRESENT	PRESENT
16870_8_11	Klebsiella pneumoniae	INF167	Australia	ERR1023806	wyres et al. 2016	human	infection	2013	PRESENT	PRESENT	PRESENT	PRESENT	PRESENT	PRESENT	PRESENT	PRESENT	PRESENT
16870_8_10	Klebsiella pneumoniae	INF166	Australia	ERR1023805	wyres et al. 2016	human	infection	2013	PRESENT	PRESENT	PRESENT	PRESENT	PRESENT	PRESENT	PRESENT	PRESENT	PRESENT
16870_8_1	Klebsiella pneumoniae	INF155	Australia	ERR1023798	wyres et al. 2016	human	infection	2013	PRESENT	PRESENT	PRESENT	PRESENT	PRESENT	PRESENT	PRESENT	PRESENT	PRESENT
16870_7_86	Klebsiella pneumoniae	INF067	Australia	ERR1023797	wyres et al. 2016	human	infection	2013	PRESENT	PRESENT	PRESENT	PRESENT	PRESENT	PRESENT	PRESENT	PRESENT	PRESENT
16870_7_84	Klebsiella pneumoniae	INF065	Australia	ERR1023796	wyres et al. 2016	human	infection	2013	PRESENT	PRESENT	PRESENT	PRESENT	PRESENT	PRESENT	PRESENT	PRESENT	PRESENT
16870_7_83	Klebsiella pneumoniae	INF063	Australia	ERR1023795	wyres et al. 2016	human	infection	2013	PRESENT	PRESENT	PRESENT	PRESENT	PRESENT	PRESENT	PRESENT	PRESENT	PRESENT
16870_7_82	Klebsiella pneumoniae	INF062	Australia	ERR1023794	wyres et al. 2016	human	infection	2013	PRESENT	PRESENT	PRESENT	PRESENT	PRESENT	PRESENT	PRESENT	PRESENT	PRESENT
16870_7_81	Klebsiella pneumoniae	INF060	Australia	ERR1023793	wyres et al. 2016	human	infection	2013	PRESENT	PRESENT	PRESENT	PRESENT	PRESENT	PRESENT	PRESENT	PRESENT	PRESENT
16870_7_80	Klebsiella pneumoniae	INF059	Australia	ERR1023792	wyres et al. 2016	human	infection	2013	PRESENT	PRESENT	PRESENT	PRESENT	PRESENT	PRESENT	PRESENT	PRESENT	PRESENT
16870_7_8	Klebsiella pneumoniae	INF357	Australia	ERR1023722	wyres et al. 2016	human	infection	2014	PRESENT	PRESENT	PRESENT	PRESENT	PRESENT	PRESENT	PRESENT	PRESENT	PRESENT
16870_7_79	Klebsiella variicola	INF058	Australia	ERR1023791	wyres et al. 2016	human	infection	2013	PRESENT	PRESENT	PRESENT	PRESENT	PRESENT	PRESENT	PRESENT	PRESENT	PRESENT
16870_7_78	Klebsiella pneumoniae	INF057	Australia	ERR1023790	wyres et al. 2016	human	infection	2013	PRESENT	PRESENT	PRESENT	PRESENT	PRESENT	PRESENT	PRESENT	PRESENT	PRESENT
16870_7_77	Klebsiella pneumoniae	INF056	Australia	ERR1023789	wyres et al. 2016	human	infection	2013	PRESENT	PRESENT	PRESENT	PRESENT	PRESENT	PRESENT	PRESENT	PRESENT	PRESENT
16870_7_76	Klebsiella pneumoniae	INF055	Australia	ERR1023788	wyres et al. 2016	human	infection	2013	PRESENT	PRESENT	PRESENT	PRESENT	PRESENT	PRESENT	PRESENT	PRESENT	PRESENT
16870_7_75	Klebsiella pneumoniae	INF054	Australia	ERR1023787	wyres et al. 2016	human	infection	2013	PRESENT	PRESENT	PRESENT	PRESENT	PRESENT	PRESENT	PRESENT	PRESENT	PRESENT
16870_7_74	Klebsiella pneumoniae	INF053	Australia	ERR1023786	wyres et al. 2016	human	infection	2013	PRESENT	PRESENT	PRESENT	PRESENT	PRESENT	PRESENT	PRESENT	PRESENT	PRESENT
16870_7_73	Klebsiella pneumoniae	INF052	Australia	ERR1023785	wyres et al. 2016	human	infection	2013	PRESENT	PRESENT	PRESENT	PRESENT	PRESENT	PRESENT	PRESENT	PRESENT	PRESENT
16870_7_72	Klebsiella pneumoniae	INF051	Australia	ERR1023784	wyres et al. 2016	human	infection	2013	PRESENT	PRESENT	PRESENT	PRESENT	PRESENT	PRESENT	PRESENT	PRESENT	PRESENT
16870_7_71	Klebsiella pneumoniae	INF050	Australia	ERR1023783	wyres et al. 2016	human	infection	2013	PRESENT	PRESENT	PRESENT	PRESENT	PRESENT	PRESENT	PRESENT	PRESENT	PRESENT
16870_7_70	Klebsiella pneumoniae	INF049	Australia	ERR1023782	wyres et al. 2016	human	infection	2013	PRESENT	PRESENT	PRESENT	PRESENT	PRESENT	PRESENT	PRESENT	PRESENT	PRESENT
16870_7_7	Klebsiella pneumoniae	INF342	Australia	ERR1023721	wyres et al. 2016	human	infection	2014	PRESENT	PRESENT	PRESENT	PRESENT	PRESENT	PRESENT	PRESENT	PRESENT	PRESENT
16870_7_69	Klebsiella variicola	INF048	Australia	ERR1023781	wyres et al. 2016	human	infection	2013	PRESENT	PRESENT	PRESENT	PRESENT	PRESENT	PRESENT	ABSENT	PRESENT	PRESENT
16870_7_68	Klebsiella variicola	INF047	Australia	ERR1023780	wyres et al. 2016	human	infection	2013	PRESENT	PRESENT	PRESENT	PRESENT	PRESENT	PRESENT	PRESENT	PRESENT	PRESENT
16870_7_67	Klebsiella pneumoniae	INF046	Australia	ERR1023779	wyres et al. 2016	human	infection	2013	PRESENT	PRESENT	PRESENT	PRESENT	PRESENT	PRESENT	PRESENT	PRESENT	PRESENT
16870_7_66	Klebsiella pneumoniae	INF045	Australia	ERR1023778	wyres et al. 2016	human	infection	2013	PRESENT	PRESENT	PRESENT	PRESENT	PRESENT	PRESENT	PRESENT	PRESENT	PRESENT
16870_7_65	Klebsiella pneumoniae	INF044	Australia	ERR1023777	wyres et al. 2016	human	infection	2013	PRESENT	PRESENT	PRESENT	PRESENT	PRESENT	PRESENT	PRESENT	PRESENT	PRESENT
16870_7_63	Klebsiella pneumoniae	INF042	Australia	ERR1023775	wyres et al. 2016	human	infection	2013	PRESENT	PRESENT	PRESENT	PRESENT	PRESENT	PRESENT	PRESENT	PRESENT	PRESENT
16870_7_62	Klebsiella pneumoniae	INF041	Australia	ERR1023774	wyres et al. 2016	human	infection	2013	PRESENT	PRESENT	PRESENT	PRESENT	PRESENT	PRESENT	PRESENT	PRESENT	PRESENT
16870_7_61	Klebsiella pneumoniae	INF040	Australia	ERR1023773	wyres et al. 2016	human	infection	2013	PRESENT	PRESENT	PRESENT	PRESENT	PRESENT	PRESENT	PRESENT	PRESENT	PRESENT
16870_7_60	Klebsiella pneumoniae	INF039	Australia	ERR1023772	wyres et al. 2016	human	infection	2013	PRESENT	PRESENT	PRESENT	PRESENT	PRESENT	PRESENT	PRESENT	PRESENT	PRESENT
16870_7_6	Klebsiella variicola	INF267	Australia	ERR1023720	wyres et al. 2016	human	infection	2013	PRESENT	PRESENT	PRESENT	PRESENT	PRESENT	PRESENT	PRESENT	PRESENT	PRESENT
16870_7_59	Klebsiella pneumoniae	INF038	Australia	ERR1023771	wyres et al. 2016	human	infection	2013	PRESENT	PRESENT	PRESENT	PRESENT	PRESENT	PRESENT	PRESENT	PRESENT	PRESENT
16870_7_57	Klebsiella variicola	INF036	Australia	ERR1023769	wyres et al. 2016	human	infection	2013	PRESENT	PRESENT	PRESENT	PRESENT	PRESENT	PRESENT	PRESENT	PRESENT	PRESENT
16870_7_56	Klebsiella quasipneumoniae subsp. similipneumoniae	INF035	Australia	ERR1023768	wyres et al. 2016	human	infection	2013	PRESENT	PRESENT	PRESENT	PRESENT	PRESENT	PRESENT	PRESENT	PRESENT	PRESENT
16870_7_55	Klebsiella quasipneumoniae subsp. similipneumoniae	INF034	Australia	ERR1023767	wyres et al. 2016	human	infection	2013	PRESENT	PRESENT	PRESENT	PRESENT	PRESENT	PRESENT	PRESENT	PRESENT	PRESENT
16870_7_54	Klebsiella pneumoniae	INF033	Australia	ERR1023766	wyres et al. 2016	human	infection	2013	PRESENT	PRESENT	PRESENT	PRESENT	PRESENT	PRESENT	PRESENT	PRESENT	PRESENT
16870_7_53	Klebsiella pneumoniae	INF032	Australia	ERR1023765	wyres et al. 2016	human	infection	2013	PRESENT	PRESENT	PRESENT	PRESENT	PRESENT	PRESENT	PRESENT	PRESENT	PRESENT
16870_7_51	Klebsiella pneumoniae	INF030	Australia	ERR1023763	wyres et al. 2016	human	infection	2013	PRESENT	PRESENT	PRESENT	PRESENT	PRESENT	PRESENT	PRESENT	PRESENT	PRESENT
16870_7_5	Klebsiella pneumoniae	INF263	Australia	ERR1023719	wyres et al. 2016	human	infection	2013	PRESENT	PRESENT	PRESENT	PRESENT	PRESENT	PRESENT	PRESENT	PRESENT	PRESENT
16870_7_49	Klebsiella pneumoniae	INF028	Australia	ERR1023761	wyres et al. 2016	human	infection	2013	PRESENT	PRESENT	PRESENT	PRESENT	PRESENT	PRESENT	PRESENT	PRESENT	PRESENT
16870_7_48	Klebsiella pneumoniae	INF027	Australia	ERR1023760	wyres et al. 2016	human	infection	2013	PRESENT	PRESENT	PRESENT	PRESENT	PRESENT	PRESENT	PRESENT	PRESENT	PRESENT
16870_7_46	Klebsiella pneumoniae	INF025	Australia	ERR1023758	wyres et al. 2016	human	infection	2013	PRESENT	PRESENT	PRESENT	PRESENT	PRESENT	PRESENT	PRESENT	PRESENT	PRESENT
16870_7_45	Klebsiella pneumoniae	INF024	Australia	ERR1023757	wyres et al. 2016	human	infection	2013	PRESENT	PRESENT	PRESENT	PRESENT	PRESENT	PRESENT	PRESENT	PRESENT	PRESENT
16870_7_44	Klebsiella pneumoniae	INF023	Australia	ERR1023756	wyres et al. 2016	human	infection	2013	PRESENT	PRESENT	PRESENT	PRESENT	PRESENT	PRESENT	PRESENT	PRESENT	PRESENT
16870_7_43	Klebsiella variicola	INF022	Australia	ERR1023755	wyres et al. 2016	human	infection	2013	PRESENT	PRESENT	PRESENT	PRESENT	PRESENT	PRESENT	PRESENT	PRESENT	PRESENT
16870_7_41	Klebsiella pneumoniae	INF020	Australia	ERR1023753	wyres et al. 2016	human	infection	2013	PRESENT	PRESENT	PRESENT	PRESENT	PRESENT	PRESENT	PRESENT	PRESENT	PRESENT
16870_7_40	Klebsiella pneumoniae	INF019	Australia	ERR1023752	wyres et al. 2016	human	infection	2013	PRESENT	PRESENT	PRESENT	PRESENT	PRESENT	PRESENT	PRESENT	PRESENT	PRESENT
16870_7_4	Klebsiella pneumoniae	INF229	Australia	ERR1023718	wyres et al. 2016	human	infection	2013	PRESENT	PRESENT	PRESENT	PRESENT	PRESENT	PRESENT	PRESENT	PRESENT	PRESENT
16870_7_39	Klebsiella pneumoniae	INF018	Australia	ERR1023751	wyres et al. 2016	human	infection	2013	PRESENT	PRESENT	PRESENT	PRESENT	PRESENT	PRESENT	PRESENT	PRESENT	PRESENT
16870_7_38	Klebsiella pneumoniae	INF017	Australia	ERR1023750	wyres et al. 2016	human	infection	2013	PRESENT	PRESENT	PRESENT	PRESENT	PRESENT	PRESENT	PRESENT	PRESENT	PRESENT
16870_7_35	Klebsiella pneumoniae	INF014	Australia	ERR1023749	wyres et al. 2016	human	infection	2013	PRESENT	PRESENT	PRESENT	PRESENT	PRESENT	PRESENT	PRESENT	PRESENT	PRESENT
16870_7_34	Klebsiella pneumoniae	INF013	Australia	ERR1023748	wyres et al. 2016	human	infection	2013	PRESENT	PRESENT	PRESENT	PRESENT	PRESENT	PRESENT	PRESENT	PRESENT	PRESENT
16870_7_33	Klebsiella pneumoniae	INF012	Australia	ERR1023747	wyres et al. 2016	human	infection	2013	PRESENT	PRESENT	PRESENT	PRESENT	PRESENT	PRESENT	PRESENT	PRESENT	PRESENT
16870_7_32	Klebsiella pneumoniae	INF011	Australia	ERR1023746	wyres et al. 2016	human	infection	2013	PRESENT	PRESENT	PRESENT	PRESENT	PRESENT	PRESENT	PRESENT	PRESENT	PRESENT
16870_7_30	Klebsiella pneumoniae	INF008	Australia	ERR1023744	wyres et al. 2016	human	infection	2013	PRESENT	PRESENT	PRESENT	PRESENT	PRESENT	PRESENT	PRESENT	PRESENT	PRESENT
16870_7_3	Klebsiella pneumoniae	INF196	Australia	ERR1023717	wyres et al. 2016	human	infection	2013	PRESENT	PRESENT	PRESENT	PRESENT	PRESENT	PRESENT	PRESENT	PRESENT	PRESENT
16870_7_29	Klebsiella pneumoniae	INF007	Australia	ERR1023743	wyres et al. 2016	human	infection	2013	PRESENT	PRESENT	PRESENT	PRESENT	PRESENT	PRESENT	PRESENT	PRESENT	PRESENT
16870_7_28	Klebsiella pneumoniae	INF006	Australia	ERR1023742	wyres et al. 2016	human	infection	2013	PRESENT	PRESENT	PRESENT	PRESENT	PRESENT	PRESENT	PRESENT	PRESENT	PRESENT
16870_7_27	Klebsiella variicola	INF005	Australia	ERR1023741	wyres et al. 2016	human	infection	2013	PRESENT	PRESENT	PRESENT	PRESENT	PRESENT	PRESENT	PRESENT	PRESENT	PRESENT
16870_7_26	Klebsiella pneumoniae	INF004	Australia	ERR1023740	wyres et al. 2016	human	infection	2013	PRESENT	PRESENT	PRESENT	PRESENT	PRESENT	PRESENT	PRESENT	PRESENT	PRESENT
16870_7_25	Klebsiella pneumoniae	INF003	Australia	ERR1023739	wyres et al. 2016	human	infection	2013	PRESENT	PRESENT	PRESENT	PRESENT	PRESENT	PRESENT	PRESENT	PRESENT	PRESENT
16870_7_24	Klebsiella pneumoniae	INF002	Australia	ERR1023738	wyres et al. 2016	human	infection	2013	PRESENT	PRESENT	PRESENT	PRESENT	PRESENT	PRESENT	PRESENT	PRESENT	PRESENT
16870_7_23	Klebsiella variicola	INF001	Australia	ERR1023737	wyres et al. 2016	human	infection	2013	PRESENT	PRESENT	PRESENT	PRESENT	PRESENT	PRESENT	PRESENT	PRESENT	PRESENT
16870_7_2	Klebsiella variicola	INF169	Australia	ERR1023716	wyres et al. 2016	human	infection	2013	PRESENT	PRESENT	PRESENT	PRESENT	PRESENT	PRESENT	PRESENT	PRESENT	PRESENT
16870_7_10	Klebsiella variicola	KSB1_9B	Australia	ERR1023724	wyres et al. 2016	human	carriage	2013	PRESENT	PRESENT	PRESENT	PRESENT	PRESENT	PRESENT	PRESENT	PRESENT	PRESENT
16852_1_9	Klebsiella variicola	KSB1_2F	Australia	ERR1023636	wyres et al. 2016	human	carriage	2013	PRESENT	PRESENT	PRESENT	PRESENT	PRESENT	PRESENT	PRESENT	PRESENT	PRESENT
16852_1_89	Klebsiella pneumoniae	MSB1_8A	Australia	ERR1023711	wyres et al. 2016	human	carriage	2014	PRESENT	PRESENT	PRESENT	PRESENT	PRESENT	PRESENT	PRESENT	PRESENT	PRESENT
16852_1_81	Klebsiella pneumoniae	KSB2_7D	Australia	ERR1023705	wyres et al. 2016	human	carriage	2014	PRESENT	PRESENT	PRESENT	PRESENT	PRESENT	PRESENT	PRESENT	PRESENT	PRESENT
16852_1_80	Klebsiella pneumoniae	KSB2_6D	Australia	ERR1023704	wyres et al. 2016	human	carriage	2014	PRESENT	PRESENT	PRESENT	PRESENT	PRESENT	PRESENT	PRESENT	PRESENT	PRESENT
16852_1_8	Klebsiella pneumoniae	KSB1_1F	Australia	ERR1023635	wyres et al. 2016	human	carriage	2013	PRESENT	PRESENT	PRESENT	PRESENT	PRESENT	PRESENT	PRESENT	PRESENT	PRESENT
16852_1_78	Klebsiella pneumoniae	KSB2_4D	Australia	ERR1023703	wyres et al. 2016	human	carriage	2014	PRESENT	PRESENT	PRESENT	PRESENT	PRESENT	PRESENT	PRESENT	PRESENT	PRESENT
16852_1_75	Klebsiella variicola	KSB2_1D	Australia	ERR1023700	wyres et al. 2016	human	carriage	2014	PRESENT	PRESENT	PRESENT	PRESENT	PRESENT	PRESENT	PRESENT	PRESENT	PRESENT
16852_1_74	Klebsiella pneumoniae	KSB2_10C	Australia	ERR1023699	wyres et al. 2016	human	carriage	2014	PRESENT	PRESENT	PRESENT	PRESENT	PRESENT	PRESENT	PRESENT	PRESENT	PRESENT
16852_1_73	Klebsiella pneumoniae	KSB2_9C	Australia	ERR1023698	wyres et al. 2016	human	carriage	2014	PRESENT	PRESENT	PRESENT	PRESENT	PRESENT	PRESENT	PRESENT	PRESENT	PRESENT
16852_1_72	Klebsiella pneumoniae	KSB2_8C	Australia	ERR1023697	wyres et al. 2016	human	carriage	2014	PRESENT	PRESENT	PRESENT	PRESENT	PRESENT	PRESENT	PRESENT	PRESENT	PRESENT
16852_1_71	Klebsiella variicola	KSB2_7C	Australia	ERR1023696	wyres et al. 2016	human	carriage	2014	PRESENT	PRESENT	PRESENT	PRESENT	PRESENT	PRESENT	PRESENT	PRESENT	PRESENT
16852_1_70	Klebsiella pneumoniae	KSB2_6C	Australia	ERR1023695	wyres et al. 2016	human	carriage	2014	PRESENT	PRESENT	PRESENT	PRESENT	PRESENT	PRESENT	PRESENT	PRESENT	PRESENT
16852_1_7	Klebsiella variicola	KSB1_10E	Australia	ERR1023634	wyres et al. 2016	human	carriage	2013	PRESENT	PRESENT	PRESENT	PRESENT	PRESENT	PRESENT	PRESENT	PRESENT	PRESENT
16852_1_69	Klebsiella pneumoniae	KSB2_3C	Australia	ERR1023694	wyres et al. 2016	human	carriage	2014	PRESENT	PRESENT	PRESENT	PRESENT	PRESENT	PRESENT	PRESENT	PRESENT	PRESENT
16852_1_67	Klebsiella pneumoniae	KSB2_1C	Australia	ERR1023693	wyres et al. 2016	human	carriage	2014	PRESENT	PRESENT	PRESENT	PRESENT	PRESENT	PRESENT	PRESENT	PRESENT	PRESENT
16852_1_66	Klebsiella pneumoniae	KSB2_10B	Australia	ERR1023692	wyres et al. 2016	human	carriage	2014	PRESENT	PRESENT	PRESENT	PRESENT	PRESENT	PRESENT	PRESENT	PRESENT	PRESENT
16852_1_65	Klebsiella pneumoniae	KSB2_8B	Australia	ERR1023691	wyres et al. 2016	human		2014	PRESENT	PRESENT	PRESENT	PRESENT	PRESENT	PRESENT	PRESENT	PRESENT	PRESENT
16852_1_64	Klebsiella pneumoniae	KSB2_7B	Australia	ERR1023690	wyres et al. 2016	human	carriage	2014	PRESENT	PRESENT	PRESENT	PRESENT	PRESENT	PRESENT	PRESENT	PRESENT	PRESENT
16852_1_63	Klebsiella pneumoniae	KSB2_6B	Australia	ERR1023689	wyres et al. 2016	human	carriage	2014	PRESENT	PRESENT	PRESENT	PRESENT	PRESENT	PRESENT	PRESENT	PRESENT	PRESENT
16852_1_62	Klebsiella pneumoniae	KSB2_4B	Australia	ERR1023688	wyres et al. 2016	human	carriage	2014	PRESENT	PRESENT	PRESENT	PRESENT	PRESENT	PRESENT	PRESENT	PRESENT	PRESENT
16852_1_61	Klebsiella pneumoniae	KSB2_3B	Australia	ERR1023687	wyres et al. 2016	human	carriage	2014	PRESENT	PRESENT	PRESENT	PRESENT	PRESENT	PRESENT	PRESENT	PRESENT	PRESENT
16852_1_60	Klebsiella pneumoniae	KSB2_2B	Australia	ERR1023686	wyres et al. 2016	human		2014	PRESENT	PRESENT	PRESENT	PRESENT	PRESENT	PRESENT	PRESENT	PRESENT	PRESENT
16852_1_6	Klebsiella pneumoniae	KSB1_9E	Australia	ERR1023633	wyres et al. 2016	human	carriage	2013	PRESENT	PRESENT	PRESENT	PRESENT	PRESENT	PRESENT	PRESENT	PRESENT	PRESENT
16852_1_59	Klebsiella pneumoniae	KSB2_1B	Australia	ERR1023685	wyres et al. 2016	human	carriage	2014	PRESENT	PRESENT	PRESENT	PRESENT	PRESENT	PRESENT	PRESENT	PRESENT	PRESENT
16852_1_56	Klebsiella pneumoniae	KSB2_8A	Australia	ERR1023682	wyres et al. 2016	human	carriage	2014	PRESENT	PRESENT	PRESENT	PRESENT	PRESENT	PRESENT	PRESENT	PRESENT	PRESENT
16852_1_55	Klebsiella pneumoniae	KSB2_7A	Australia	ERR1023681	wyres et al. 2016	human	carriage	2014	PRESENT	PRESENT	PRESENT	PRESENT	PRESENT	PRESENT	PRESENT	PRESENT	PRESENT
16852_1_54	Klebsiella variicola	KSB2_6A	Australia	ERR1023680	wyres et al. 2016	human	carriage	2014	PRESENT	PRESENT	PRESENT	PRESENT	PRESENT	PRESENT	PRESENT	PRESENT	PRESENT
16852_1_53	Klebsiella pneumoniae	KSB2_5A	Australia	ERR1023679	wyres et al. 2016	human		2014	PRESENT	PRESENT	PRESENT	PRESENT	PRESENT	PRESENT	PRESENT	PRESENT	PRESENT
16852_1_52	Klebsiella quasipneumoniae subsp. similipneumoniae	KSB2_4A	Australia	ERR1023678	wyres et al. 2016	human	carriage	2014	PRESENT	PRESENT	PRESENT	PRESENT	PRESENT	ABSENT	ABSENT	PRESENT	ABSENT
16852_1_51	Klebsiella variicola	KSB2_3A	Australia	ERR1023677	wyres et al. 2016	human	carriage	2014	PRESENT	PRESENT	PRESENT	PRESENT	PRESENT	PRESENT	PRESENT	PRESENT	PRESENT
16852_1_48	Klebsiella pneumoniae	KSB1_10J	Australia	ERR1023674	wyres et al. 2016	human	carriage	2014	PRESENT	PRESENT	PRESENT	PRESENT	PRESENT	PRESENT	PRESENT	PRESENT	PRESENT
16852_1_47	Klebsiella pneumoniae	KSB1_9J	Australia	ERR1023673	wyres et al. 2016	human	carriage	2014	PRESENT	PRESENT	PRESENT	PRESENT	PRESENT	PRESENT	PRESENT	PRESENT	PRESENT
16852_1_46	Klebsiella variicola	KSB1_8J	Australia	ERR1023672	wyres et al. 2016	human	carriage	2014	PRESENT	PRESENT	PRESENT	PRESENT	PRESENT	PRESENT	PRESENT	PRESENT	PRESENT
16852_1_45	Klebsiella pneumoniae	KSB1_7J	Australia	ERR1023671	wyres et al. 2016	human	carriage	2014	PRESENT	PRESENT	PRESENT	PRESENT	PRESENT	PRESENT	PRESENT	PRESENT	PRESENT
16852_1_43	Klebsiella pneumoniae	KSB1_3J	Australia	ERR1023669	wyres et al. 2016	human	carriage	2014	PRESENT	PRESENT	PRESENT	PRESENT	PRESENT	PRESENT	PRESENT	PRESENT	PRESENT
16852_1_42	Klebsiella variicola	KSB1_2J	Australia	ERR1023668	wyres et al. 2016	human	carriage	2014	PRESENT	PRESENT	PRESENT	PRESENT	PRESENT	PRESENT	PRESENT	PRESENT	PRESENT
16852_1_40	Klebsiella pneumoniae	KSB1_9I	Australia	ERR1023666	wyres et al. 2016	human	carriage	2014	PRESENT	PRESENT	PRESENT	PRESENT	PRESENT	PRESENT	PRESENT	PRESENT	PRESENT
16852_1_4	Klebsiella pneumoniae	KSB1_7E	Australia	ERR1023631	wyres et al. 2016	human	carriage	2013	PRESENT	PRESENT	PRESENT	PRESENT	PRESENT	PRESENT	PRESENT	PRESENT	PRESENT
16852_1_39	Klebsiella pneumoniae	KSB1_8I	Australia	ERR1023665	wyres et al. 2016	human	carriage	2014	PRESENT	PRESENT	PRESENT	PRESENT	PRESENT	PRESENT	PRESENT	PRESENT	PRESENT
16852_1_38	Klebsiella pneumoniae	KSB1_6I	Australia	ERR1023664	wyres et al. 2016	human	carriage	2014	PRESENT	PRESENT	PRESENT	PRESENT	PRESENT	PRESENT	PRESENT	PRESENT	PRESENT
16852_1_36	Klebsiella quasipneumoniae subsp. similipneumoniae	KSB1_3I	Australia	ERR1023662	wyres et al. 2016	human	carriage	2014	PRESENT	PRESENT	PRESENT	PRESENT	PRESENT	PRESENT	PRESENT	PRESENT	PRESENT
16852_1_34	Klebsiella pneumoniae	KSB1_1I	Australia	ERR1023660	wyres et al. 2016	human	carriage	2014	PRESENT	PRESENT	PRESENT	PRESENT	PRESENT	PRESENT	PRESENT	PRESENT	PRESENT
16852_1_33	Klebsiella pneumoniae	KSB1_10H	Australia	ERR1023659	wyres et al. 2016	human	carriage	2014	PRESENT	PRESENT	PRESENT	PRESENT	PRESENT	PRESENT	PRESENT	PRESENT	PRESENT
16852_1_30	Klebsiella pneumoniae	KSB1_7H	Australia	ERR1023656	wyres et al. 2016	human	carriage	2014	PRESENT	PRESENT	PRESENT	PRESENT	PRESENT	PRESENT	PRESENT	PRESENT	PRESENT
16852_1_3	Klebsiella pneumoniae	KSB1_6E	Australia	ERR1023630	wyres et al. 2016	human	carriage	2013	PRESENT	PRESENT	PRESENT	PRESENT	PRESENT	PRESENT	PRESENT	PRESENT	PRESENT
16852_1_27	Klebsiella variicola	KSB1_4H	Australia	ERR1023654	wyres et al. 2016	human	carriage	2014	PRESENT	PRESENT	PRESENT	PRESENT	PRESENT	PRESENT	PRESENT	PRESENT	PRESENT
16852_1_26	Klebsiella pneumoniae	KSB1_2H	Australia	ERR1023653	wyres et al. 2016	human	carriage	2014	PRESENT	PRESENT	PRESENT	PRESENT	PRESENT	PRESENT	PRESENT	PRESENT	PRESENT
16852_1_25	Klebsiella pneumoniae	KSB1_10G	Australia	ERR1023652	wyres et al. 2016	human	carriage	2014	PRESENT	PRESENT	PRESENT	PRESENT	PRESENT	PRESENT	PRESENT	PRESENT	PRESENT
16852_1_23	Klebsiella pneumoniae	KSB1_8G	Australia	ERR1023650	wyres et al. 2016	human	carriage	2013	PRESENT	PRESENT	PRESENT	PRESENT	PRESENT	PRESENT	PRESENT	PRESENT	PRESENT
16852_1_22	Klebsiella pneumoniae	KSB1_7G	Australia	ERR1023649	wyres et al. 2016	human	carriage	2013	PRESENT	PRESENT	PRESENT	PRESENT	PRESENT	PRESENT	PRESENT	PRESENT	PRESENT
16852_1_21	Klebsiella pneumoniae	KSB1_6G	Australia	ERR1023648	wyres et al. 2016	human	carriage	2013	PRESENT	PRESENT	PRESENT	PRESENT	PRESENT	PRESENT	PRESENT	PRESENT	PRESENT
16852_1_20	Klebsiella quasipneumoniae subsp. quasipneumoniae	KSB1_4G	Australia	ERR1023647	wyres et al. 2016	human	carriage	2013	PRESENT	PRESENT	PRESENT	PRESENT	PRESENT	PRESENT	PRESENT	PRESENT	PRESENT
16852_1_2	Klebsiella pneumoniae	KSB1_5E	Australia	ERR1023629	wyres et al. 2016	human	carriage	2013	PRESENT	PRESENT	PRESENT	PRESENT	PRESENT	PRESENT	PRESENT	PRESENT	PRESENT
16852_1_19	Klebsiella pneumoniae	KSB1_3G	Australia	ERR1023646	wyres et al. 2016	human	carriage	2013	PRESENT	PRESENT	PRESENT	PRESENT	PRESENT	PRESENT	PRESENT	PRESENT	PRESENT
16852_1_18	Klebsiella variicola	KSB1_2G	Australia	ERR1023645	wyres et al. 2016	human	carriage	2013	PRESENT	PRESENT	PRESENT	PRESENT	PRESENT	PRESENT	PRESENT	PRESENT	PRESENT
16852_1_17	Klebsiella pneumoniae	KSB1_1G	Australia	ERR1023644	wyres et al. 2016	human	carriage	2013	PRESENT	PRESENT	PRESENT	PRESENT	PRESENT	PRESENT	PRESENT	PRESENT	PRESENT
16852_1_16	Klebsiella variicola	KSB1_10F	Australia	ERR1023643	wyres et al. 2016	human	carriage	2013	PRESENT	PRESENT	PRESENT	PRESENT	PRESENT	PRESENT	PRESENT	PRESENT	PRESENT
16852_1_15	Klebsiella variicola	KSB1_9F	Australia	ERR1023642	wyres et al. 2016	human	carriage	2013	PRESENT	PRESENT	PRESENT	PRESENT	PRESENT	PRESENT	PRESENT	PRESENT	PRESENT
16852_1_14	Klebsiella variicola	KSB1_8F	Australia	ERR1023641	wyres et al. 2016	human	carriage	2013	PRESENT	PRESENT	PRESENT	PRESENT	PRESENT	PRESENT	PRESENT	PRESENT	PRESENT
16852_1_13	Klebsiella pneumoniae	KSB1_7F	Australia	ERR1023640	wyres et al. 2016	human	carriage	2013	PRESENT	PRESENT	PRESENT	PRESENT	PRESENT	PRESENT	PRESENT	PRESENT	PRESENT
16852_1_12	Klebsiella pneumoniae	KSB1_5F	Australia	ERR1023639	wyres et al. 2016	human	carriage	2013	PRESENT	PRESENT	PRESENT	PRESENT	PRESENT	PRESENT	PRESENT	PRESENT	PRESENT
16852_1_11	Klebsiella variicola	KSB1_4F	Australia	ERR1023638	wyres et al. 2016	human	carriage	2013	PRESENT	PRESENT	PRESENT	PRESENT	PRESENT	PRESENT	PRESENT	PRESENT	PRESENT
16852_1_10	Klebsiella variicola	KSB1_3F	Australia	ERR1023637	wyres et al. 2016	human	carriage	2013	PRESENT	PRESENT	PRESENT	PRESENT	PRESENT	PRESENT	PRESENT	PRESENT	PRESENT
16852_1_1	Klebsiella pneumoniae	KSB1_4E	Australia	ERR1023628	wyres et al. 2016	human	carriage	2013	PRESENT	PRESENT	PRESENT	PRESENT	PRESENT	PRESENT	PRESENT	PRESENT	PRESENT
16780_7_73	Klebsiella pneumoniae	MINF_7E	Australia	ERR1015427	wyres et al. 2016	human	infection	2014	PRESENT	PRESENT	PRESENT	PRESENT	PRESENT	PRESENT	PRESENT	PRESENT	PRESENT
16780_7_51	Klebsiella pneumoniae	MINF_6B	Australia	ERR1015406	wyres et al. 2016	human		2014	PRESENT	PRESENT	PRESENT	PRESENT	PRESENT	PRESENT	PRESENT	PRESENT	PRESENT
16780_6_9	Klebsiella pneumoniae	INF356	Australia	ERR1015289	wyres et al. 2016	human	infection	2014	PRESENT	PRESENT	PRESENT	PRESENT	PRESENT	PRESENT	PRESENT	PRESENT	PRESENT
16780_6_8	Klebsiella pneumoniae	INF355	Australia	ERR1015288	wyres et al. 2016	human		2014	PRESENT	PRESENT	PRESENT	PRESENT	PRESENT	PRESENT	PRESENT	PRESENT	PRESENT
16780_6_7	Klebsiella pneumoniae	INF354	Australia	ERR1015287	wyres et al. 2016	human	infection	2014	PRESENT	PRESENT	PRESENT	PRESENT	PRESENT	PRESENT	PRESENT	PRESENT	PRESENT
16780_6_68	Klebsiella pneumoniae	MSB1_5D 14021410	Australia	ERR1015341	wyres et al. 2016	human			PRESENT	PRESENT	PRESENT	PRESENT	PRESENT	PRESENT	PRESENT	PRESENT	PRESENT
16780_6_6	Klebsiella pneumoniae	INF353	Australia	ERR1015286	wyres et al. 2016	human	infection	2014	PRESENT	PRESENT	PRESENT	PRESENT	PRESENT	PRESENT	PRESENT	PRESENT	PRESENT
16780_6_5	Klebsiella variicola	INF352	Australia	ERR1015285	wyres et al. 2016	human	infection	2014	PRESENT	PRESENT	PRESENT	PRESENT	PRESENT	PRESENT	PRESENT	PRESENT	PRESENT
16780_6_48	Klebsiella pneumoniae	KSB1_3E	Australia	ERR1015323	wyres et al. 2016	human	carriage	2013	PRESENT	PRESENT	PRESENT	PRESENT	PRESENT	PRESENT	PRESENT	PRESENT	PRESENT
16780_6_47	Klebsiella pneumoniae	KSB1_2E	Australia	ERR1015322	wyres et al. 2016	human	carriage	2013	PRESENT	PRESENT	PRESENT	PRESENT	PRESENT	PRESENT	PRESENT	PRESENT	PRESENT
16780_6_44	Klebsiella variicola	KSB1_8D	Australia	ERR1015321	wyres et al. 2016	human	carriage	2013	PRESENT	PRESENT	PRESENT	PRESENT	PRESENT	PRESENT	PRESENT	PRESENT	PRESENT
16780_6_43	Klebsiella pneumoniae	KSB1_7D	Australia	ERR1015320	wyres et al. 2016	human	carriage	2013	PRESENT	PRESENT	PRESENT	PRESENT	PRESENT	PRESENT	PRESENT	PRESENT	PRESENT
16780_6_42	Klebsiella quasipneumoniae subsp. similipneumoniae	KSB1_6D	Australia	ERR1015319	wyres et al. 2016	human	carriage	2013	PRESENT	PRESENT	PRESENT	PRESENT	PRESENT	PRESENT	PRESENT	PRESENT	PRESENT
16780_6_41	Klebsiella pneumoniae	KSB1_4D	Australia	ERR1015318	wyres et al. 2016	human	carriage	2013	PRESENT	PRESENT	PRESENT	PRESENT	PRESENT	PRESENT	PRESENT	PRESENT	PRESENT
16780_6_40	Klebsiella pneumoniae	KSB1_3D	Australia	ERR1015317	wyres et al. 2016	human	carriage	2013	PRESENT	PRESENT	PRESENT	PRESENT	PRESENT	PRESENT	PRESENT	PRESENT	PRESENT
16780_6_4	Klebsiella pneumoniae	INF351	Australia	ERR1015284	wyres et al. 2016	human	infection	2014	PRESENT	PRESENT	PRESENT	PRESENT	PRESENT	PRESENT	PRESENT	PRESENT	PRESENT
16780_6_39	Klebsiella pneumoniae	KSB1_2D	Australia	ERR1015316	wyres et al. 2016	human	carriage	2013	PRESENT	PRESENT	PRESENT	PRESENT	PRESENT	PRESENT	PRESENT	PRESENT	PRESENT
16780_6_38	Klebsiella pneumoniae	KSB1_1D	Australia	ERR1015315	wyres et al. 2016	human	carriage	2013	PRESENT	PRESENT	PRESENT	PRESENT	PRESENT	PRESENT	PRESENT	PRESENT	PRESENT
16780_6_37	Klebsiella pneumoniae	KSB1_10C	Australia	ERR1015314	wyres et al. 2016	human	carriage	2013	PRESENT	PRESENT	PRESENT	PRESENT	PRESENT	PRESENT	PRESENT	PRESENT	PRESENT
16780_6_35	Klebsiella pneumoniae	KSB1_8C	Australia	ERR1015312	wyres et al. 2016	human	carriage	2013	PRESENT	PRESENT	PRESENT	PRESENT	PRESENT	PRESENT	PRESENT	PRESENT	PRESENT
16780_6_34	Klebsiella pneumoniae	KSB1_7C	Australia	ERR1015311	wyres et al. 2016	human	carriage	2013	PRESENT	PRESENT	PRESENT	PRESENT	PRESENT	PRESENT	PRESENT	PRESENT	PRESENT
16780_6_33	Klebsiella pneumoniae	KSB1_6C	Australia	ERR1015310	wyres et al. 2016	human	carriage	2013	PRESENT	PRESENT	PRESENT	PRESENT	PRESENT	PRESENT	PRESENT	PRESENT	PRESENT
16780_6_32	Klebsiella pneumoniae	KSB1_5C	Australia	ERR1015309	wyres et al. 2016	human	carriage	2013	PRESENT	PRESENT	PRESENT	PRESENT	PRESENT	PRESENT	PRESENT	PRESENT	PRESENT
16780_6_31	Klebsiella pneumoniae	KSB1_4C	Australia	ERR1015308	wyres et al. 2016	human	carriage	2013	PRESENT	PRESENT	PRESENT	PRESENT	PRESENT	PRESENT	PRESENT	PRESENT	PRESENT
16780_6_3	Klebsiella pneumoniae	INF350	Australia	ERR1015283	wyres et al. 2016	human	infection	2014	PRESENT	PRESENT	PRESENT	PRESENT	PRESENT	PRESENT	PRESENT	PRESENT	PRESENT
16780_6_28	Klebsiella pneumoniae	KSB1_1C	Australia	ERR1015307	wyres et al. 2016	human	carriage	2013	PRESENT	PRESENT	PRESENT	PRESENT	PRESENT	PRESENT	PRESENT	PRESENT	PRESENT
16780_6_27	Klebsiella variicola	KSB1_10B	Australia	ERR1015306	wyres et al. 2016	human	carriage	2013	PRESENT	PRESENT	PRESENT	PRESENT	PRESENT	PRESENT	PRESENT	PRESENT	PRESENT
16780_6_26	Klebsiella variicola	KSB1_8B	Australia	ERR1015305	wyres et al. 2016	human	carriage	2013	PRESENT	PRESENT	PRESENT	PRESENT	PRESENT	PRESENT	PRESENT	PRESENT	PRESENT
16780_6_25	Klebsiella pneumoniae	KSB1_4B	Australia	ERR1015304	wyres et al. 2016	human	carriage	2013	PRESENT	PRESENT	PRESENT	PRESENT	PRESENT	PRESENT	PRESENT	PRESENT	PRESENT
16780_6_24	Klebsiella variicola	KSB1_3B	Australia	ERR1015303	wyres et al. 2016	human	carriage	2013	PRESENT	PRESENT	PRESENT	PRESENT	PRESENT	PRESENT	PRESENT	PRESENT	PRESENT
16780_6_23	Klebsiella pneumoniae	KSB1_2B	Australia	ERR1015302	wyres et al. 2016	human	carriage	2013	PRESENT	PRESENT	PRESENT	PRESENT	PRESENT	PRESENT	PRESENT	PRESENT	PRESENT
16780_6_22	Klebsiella pneumoniae	KSB1_10A	Australia	ERR1015301	wyres et al. 2016	human	carriage	2013	PRESENT	PRESENT	PRESENT	PRESENT	PRESENT	PRESENT	PRESENT	PRESENT	PRESENT
16780_6_21	Klebsiella pneumoniae	KSB1_8A	Australia	ERR1015300	wyres et al. 2016	human	carriage	2013	PRESENT	PRESENT	PRESENT	PRESENT	PRESENT	PRESENT	PRESENT	PRESENT	PRESENT
16780_6_2	Klebsiella variicola	INF349	Australia	ERR1015282	wyres et al. 2016	human	infection	2014	PRESENT	PRESENT	PRESENT	PRESENT	PRESENT	PRESENT	PRESENT	PRESENT	PRESENT
16780_6_18	Klebsiella pneumoniae	KSB1_5A	Australia	ERR1015298	wyres et al. 2016	human	carriage	2013	PRESENT	PRESENT	PRESENT	PRESENT	PRESENT	PRESENT	PRESENT	PRESENT	PRESENT
16780_6_17	Klebsiella pneumoniae	KSB1_4A	Australia	ERR1015297	wyres et al. 2016	human	carriage	2013	PRESENT	PRESENT	PRESENT	PRESENT	PRESENT	PRESENT	PRESENT	PRESENT	PRESENT
16780_6_16	Klebsiella variicola	KSB1_2A	Australia	ERR1015296	wyres et al. 2016	human	carriage	2013	PRESENT	PRESENT	PRESENT	PRESENT	PRESENT	PRESENT	PRESENT	PRESENT	PRESENT
16780_6_15	Klebsiella pneumoniae	KSB1_1A	Australia	ERR1015295	wyres et al. 2016	human	carriage	2013	PRESENT	PRESENT	PRESENT	PRESENT	PRESENT	PRESENT	PRESENT	PRESENT	PRESENT
16780_6_13	Klebsiella pneumoniae	INF361	Australia	ERR1015293	wyres et al. 2016	human	infection	2014	PRESENT	PRESENT	PRESENT	PRESENT	PRESENT	PRESENT	PRESENT	PRESENT	PRESENT
16780_6_12	Klebsiella pneumoniae	INF360	Australia	ERR1015292	wyres et al. 2016	human	infection	2014	PRESENT	PRESENT	PRESENT	PRESENT	PRESENT	PRESENT	PRESENT	PRESENT	PRESENT
16780_6_11	Klebsiella pneumoniae	INF359	Australia	ERR1015291	wyres et al. 2016	human	infection	2014	PRESENT	PRESENT	PRESENT	PRESENT	PRESENT	PRESENT	PRESENT	PRESENT	PRESENT
16780_6_10	Klebsiella pneumoniae	INF358	Australia	ERR1015290	wyres et al. 2016	human	infection	2014	PRESENT	PRESENT	PRESENT	PRESENT	PRESENT	PRESENT	PRESENT	PRESENT	PRESENT
16780_6_1	Klebsiella pneumoniae	INF348	Australia	ERR1015281	wyres et al. 2016	human	infection	2014	PRESENT	PRESENT	PRESENT	PRESENT	PRESENT	PRESENT	PRESENT	PRESENT	PRESENT
16703_7_9	Klebsiella pneumoniae	INF256	Australia	ERR1008719	wyres et al. 2016	human	infection	2013	PRESENT	PRESENT	PRESENT	PRESENT	PRESENT	PRESENT	PRESENT	PRESENT	PRESENT
16703_7_86	Klebsiella pneumoniae	INF347	Australia	ERR1008794	wyres et al. 2016	human	infection	2014	PRESENT	PRESENT	PRESENT	PRESENT	PRESENT	PRESENT	PRESENT	PRESENT	PRESENT
16703_7_85	Klebsiella pneumoniae	INF346	Australia	ERR1008793	wyres et al. 2016	human	infection	2014	PRESENT	PRESENT	PRESENT	PRESENT	PRESENT	PRESENT	PRESENT	PRESENT	PRESENT
16703_7_84	Klebsiella variicola	INF345	Australia	ERR1008792	wyres et al. 2016	human	infection	2014	PRESENT	PRESENT	PRESENT	PRESENT	PRESENT	PRESENT	PRESENT	PRESENT	PRESENT
16703_7_83	Klebsiella pneumoniae	INF344	Australia	ERR1008791	wyres et al. 2016	human	infection	2014	PRESENT	PRESENT	PRESENT	PRESENT	PRESENT	PRESENT	PRESENT	PRESENT	PRESENT
16703_7_81	Klebsiella pneumoniae	INF341	Australia	ERR1008790	wyres et al. 2016	human	infection	2014	PRESENT	PRESENT	PRESENT	PRESENT	PRESENT	PRESENT	PRESENT	PRESENT	PRESENT
16703_7_79	Klebsiella pneumoniae	INF338	Australia	ERR1008788	wyres et al. 2016	human	infection	2014	PRESENT	PRESENT	PRESENT	PRESENT	PRESENT	PRESENT	PRESENT	PRESENT	PRESENT
16703_7_78	Klebsiella pneumoniae	INF337	Australia	ERR1008787	wyres et al. 2016	human	infection	2014	PRESENT	PRESENT	PRESENT	PRESENT	PRESENT	PRESENT	PRESENT	PRESENT	PRESENT
16703_7_77	Klebsiella variicola	INF336	Australia	ERR1008786	wyres et al. 2016	human	infection	2014	PRESENT	PRESENT	PRESENT	PRESENT	PRESENT	PRESENT	PRESENT	PRESENT	PRESENT
16703_7_75	Klebsiella pneumoniae	INF334	Australia	ERR1008784	wyres et al. 2016	human	infection	2014	PRESENT	PRESENT	PRESENT	PRESENT	PRESENT	PRESENT	PRESENT	PRESENT	PRESENT
16703_7_74	Klebsiella pneumoniae	INF331	Australia	ERR1008783	wyres et al. 2016	human	infection	2014	PRESENT	PRESENT	PRESENT	PRESENT	PRESENT	PRESENT	PRESENT	PRESENT	PRESENT
16703_7_73	Klebsiella variicola	INF330	Australia	ERR1008782	wyres et al. 2016	human	infection	2014	PRESENT	PRESENT	PRESENT	PRESENT	PRESENT	PRESENT	PRESENT	PRESENT	PRESENT
16703_7_72	Klebsiella pneumoniae	INF329	Australia	ERR1008781	wyres et al. 2016	human	infection	2014	PRESENT	PRESENT	PRESENT	PRESENT	PRESENT	PRESENT	PRESENT	PRESENT	PRESENT
16703_7_71	Klebsiella pneumoniae	INF328	Australia	ERR1008780	wyres et al. 2016	human	infection	2014	PRESENT	PRESENT	PRESENT	PRESENT	PRESENT	PRESENT	PRESENT	PRESENT	PRESENT
16703_7_70	Klebsiella pneumoniae	INF327	Australia	ERR1008779	wyres et al. 2016	human	infection	2014	PRESENT	PRESENT	PRESENT	PRESENT	PRESENT	PRESENT	PRESENT	PRESENT	PRESENT
16703_7_7	Klebsiella pneumoniae	INF253	Australia	ERR1008718	wyres et al. 2016	human	infection	2013	PRESENT	PRESENT	PRESENT	PRESENT	PRESENT	PRESENT	PRESENT	PRESENT	PRESENT
16703_7_69	Klebsiella pneumoniae	INF325	Australia	ERR1008778	wyres et al. 2016	human	infection	2014	PRESENT	PRESENT	PRESENT	PRESENT	PRESENT	PRESENT	PRESENT	PRESENT	PRESENT
[truncated: 716 more rows]
